# Supplementary material
Source: PubMed Central journal article supplement (PMC4638043)
Supplement: supp_M114.047530_mcp.M114.047530-1.pdf [file supp_M114.047530_mcp.M114.047530-1.pdf]

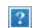

# Mascot Search Results

User : bo ek  
 Email : bo.ek@kemi.uu.se  
 Search title : bo\_21Ronqvist  
 MS data file : data06.mgf  
 Database : Swissprot2013 sprot (540261 sequences; 191876607 residues)  
 Taxonomy : Homo sapiens (human) (20258 sequences)  
 Timestamp : 16 Jun 2014 at 07:12:53 GMT  
 Enzyme : Trypsin  
 Fixed modifications : Carbamidomethyl (C)  
 Variable modifications : Oxidation (M)  
 Mass values : Monoisotopic  
 Protein Mass : Unrestricted  
 Peptide Mass Tolerance : ± 10 ppm  
 Fragment Mass Tolerance : ± 0.4 Da  
 Max Missed Cleavages : 1  
 Instrument type : ESI-FTICR  
 Number of queries : 5951  
 Protein hits :

|                              |                                                                                                       |
|------------------------------|-------------------------------------------------------------------------------------------------------|
| <a href="#">AMPN HUMAN</a>   | Aminopeptidase N OS=Homo sapiens GN=ANPEP PE=1 SV=4                                                   |
| <a href="#">DPP4 HUMAN</a>   | Dipeptidyl peptidase 4 OS=Homo sapiens GN=DPP4 PE=1 SV=2                                              |
| <a href="#">NEP HUMAN</a>    | Neprilysin OS=Homo sapiens GN=MME PE=1 SV=2                                                           |
| <a href="#">K1C9 HUMAN</a>   | Keratin, type I cytoskeletal 9 OS=Homo sapiens GN=KRT9 PE=1 SV=3                                      |
| <a href="#">K22E HUMAN</a>   | Keratin, type II cytoskeletal 2 epidermal OS=Homo sapiens GN=KRT2 PE=1 SV=2                           |
| <a href="#">GAPR1 HUMAN</a>  | Golgi-associated plant pathogenesis-related protein 1 OS=Homo sapiens GN=GLIPR2 PE=1 SV=3             |
| <a href="#">K2C1 HUMAN</a>   | Keratin, type II cytoskeletal 1 OS=Homo sapiens GN=KRT1 PE=1 SV=6                                     |
| <a href="#">TMPS2 HUMAN</a>  | Transmembrane protease serine 2 OS=Homo sapiens GN=TMPS2 PE=1 SV=3                                    |
| <a href="#">BASP1 HUMAN</a>  | Brain acid soluble protein 1 OS=Homo sapiens GN=BASP1 PE=1 SV=2                                       |
| <a href="#">ASM3B HUMAN</a>  | Acid sphingomyelinase-like phosphodiesterase 3b OS=Homo sapiens GN=SMPDL3B PE=2 SV=2                  |
| <a href="#">IFM1 HUMAN</a>   | Interferon-induced transmembrane protein 1 OS=Homo sapiens GN=IFITM1 PE=1 SV=3                        |
| <a href="#">RAB3B HUMAN</a>  | Ras-related protein Rab-3B OS=Homo sapiens GN=RAB3B PE=1 SV=2                                         |
| <a href="#">ADAM9 HUMAN</a>  | Disintegrin and metalloproteinase domain-containing protein 9 OS=Homo sapiens GN=ADAM9 PE=1 SV=1      |
| <a href="#">TRFL HUMAN</a>   | Lactotransferrin OS=Homo sapiens GN=LTF PE=1 SV=6                                                     |
| <a href="#">IDHC HUMAN</a>   | Isocitrate dehydrogenase [NADP] cytoplasmic OS=Homo sapiens GN=IDH1 PE=1 SV=2                         |
| <a href="#">CA2D1 HUMAN</a>  | Voltage-dependent calcium channel subunit alpha-2/delta-1 OS=Homo sapiens GN=CACNA2D1 PE=1 SV=3       |
| <a href="#">CD177 HUMAN</a>  | CD177 antigen OS=Homo sapiens GN=CD177 PE=1 SV=2                                                      |
| <a href="#">L433Z HUMAN</a>  | 14-3-3 protein zeta/delta OS=Homo sapiens GN=YWHAZ PE=1 SV=1                                          |
| <a href="#">S15A2 HUMAN</a>  | Solute carrier family 15 member 2 OS=Homo sapiens GN=SLC15A2 PE=2 SV=2                                |
| <a href="#">PDC6I HUMAN</a>  | Programmed cell death 6-interacting protein OS=Homo sapiens GN=PDC6IP PE=1 SV=1                       |
| <a href="#">AT8A1 HUMAN</a>  | Probable phospholipid-transporting ATPase IA OS=Homo sapiens GN=ATP8A1 PE=1 SV=1                      |
| <a href="#">STEAP4 HUMAN</a> | Metalloreductase STEAP4 OS=Homo sapiens GN=STEAP4 PE=1 SV=1                                           |
| <a href="#">SEMGL1 HUMAN</a> | Semenogelin-1 OS=Homo sapiens GN=SEMGL1 PE=1 SV=2                                                     |
| <a href="#">ALBU HUMAN</a>   | Serum albumin OS=Homo sapiens GN=ALB PE=1 SV=2                                                        |
| <a href="#">SNP23 HUMAN</a>  | Synaptosomal-associated protein 23 OS=Homo sapiens GN=SNAP23 PE=1 SV=1                                |
| <a href="#">L433T HUMAN</a>  | 14-3-3 protein theta OS=Homo sapiens GN=YWHAQ PE=1 SV=1                                               |
| <a href="#">PGK1 HUMAN</a>   | Phosphoglycerate kinase 1 OS=Homo sapiens GN=PGK1 PE=1 SV=3                                           |
| <a href="#">ANXA2 HUMAN</a>  | Annexin A2 OS=Homo sapiens GN=ANXA2 PE=1 SV=2                                                         |
| <a href="#">TGM4 HUMAN</a>   | Protein-glutamine gamma-glutamyltransferase 4 OS=Homo sapiens GN=TGM4 PE=1 SV=2                       |
| <a href="#">VPP1 HUMAN</a>   | V-type proton ATPase 116 kDa subunit a isoform 1 OS=Homo sapiens GN=ATP6V0A1 PE=1 SV=3                |
| <a href="#">GPC5C HUMAN</a>  | G-protein coupled receptor family C group 5 member C OS=Homo sapiens GN=GPRC5C PE=1 SV=2              |
| <a href="#">EDIL3 HUMAN</a>  | EGF-like repeat and discoidin I-like domain-containing protein 3 OS=Homo sapiens GN=EDIL3 PE=1 SV=1   |
| <a href="#">FOLH1 HUMAN</a>  | Glutamate carboxypeptidase 2 OS=Homo sapiens GN=FOLH1 PE=1 SV=1                                       |
| <a href="#">NHRF1 HUMAN</a>  | Na(+)/H(+) exchange regulatory cofactor NHE-RF1 OS=Homo sapiens GN=SLC9A3R1 PE=1 SV=4                 |
| <a href="#">GNAI3 HUMAN</a>  | Guanine nucleotide-binding protein G(k) subunit alpha OS=Homo sapiens GN=GNAI3 PE=1 SV=3              |
| <a href="#">ATP9A HUMAN</a>  | Probable phospholipid-transporting ATPase IIA OS=Homo sapiens GN=ATP9A PE=1 SV=3                      |
| <a href="#">MYO1C HUMAN</a>  | Unconventional myosin-Ic OS=Homo sapiens GN=MYO1C PE=1 SV=4                                           |
| <a href="#">GNAS1 HUMAN</a>  | Guanine nucleotide-binding protein G(s) subunit alpha isoforms XLas OS=Homo sapiens GN=GNAS PE=1 SV=2 |
| <a href="#">RHOG HUMAN</a>   | Rho-related GTP-binding protein RhoG OS=Homo sapiens GN=RHO G PE=1 SV=1                               |
| <a href="#">MGA HUMAN</a>    | Maltase-glucoamylase, intestinal OS=Homo sapiens GN=MGAM PE=1 SV=5                                    |
| <a href="#">ARRD1 HUMAN</a>  | Arrestin domain-containing protein 1 OS=Homo sapiens GN=ARRDC1 PE=2 SV=1                              |
| <a href="#">HSP7C HUMAN</a>  | Heat shock cognate 71 kDa protein OS=Homo sapiens GN=HSPA8 PE=1 SV=1                                  |
| <a href="#">SPIT1 HUMAN</a>  | Kunitz-type protease inhibitor 1 OS=Homo sapiens GN=SPINT1 PE=1 SV=2                                  |
| <a href="#">CDC42 HUMAN</a>  | Cell division control protein 42 homolog OS=Homo sapiens GN=CDC42 PE=1 SV=2                           |
| <a href="#">MPI HUMAN</a>    | Mannose-6-phosphate isomerase OS=Homo sapiens GN=MPI PE=1 SV=2                                        |
| <a href="#">PCBP1 HUMAN</a>  | Poly(rC)-binding protein 1 OS=Homo sapiens GN=PCBP1 PE=1 SV=2                                         |
| <a href="#">HSP71 HUMAN</a>  | Heat shock 70 kDa protein 1A/1B OS=Homo sapiens GN=HSPA1A PE=1 SV=5                                   |
| <a href="#">ENOA HUMAN</a>   | Alpha-enolase OS=Homo sapiens GN=ENO1 PE=1 SV=2                                                       |
| <a href="#">K1C16 HUMAN</a>  | Keratin, type I cytoskeletal 16 OS=Homo sapiens GN=KRT16 PE=1 SV=4                                    |
| <a href="#">VP37B HUMAN</a>  | Vacuolar protein sorting-associated protein 37B OS=Homo sapiens GN=VPS37B PE=1 SV=1                   |
| <a href="#">ANXA1 HUMAN</a>  | Annexin A1 OS=Homo sapiens GN=ANXA1 PE=1 SV=2                                                         |
| <a href="#">ALDOA HUMAN</a>  | Fructose-bisphosphate aldolase A OS=Homo sapiens GN=ALDOA PE=1 SV=2                                   |
| <a href="#">CAN5 HUMAN</a>   | Calpain-5 OS=Homo sapiens GN=CAPN5 PE=1 SV=2                                                          |
| <a href="#">HS90A HUMAN</a>  | Heat shock protein HSP 90-alpha OS=Homo sapiens GN=HSP90AA1 PE=1 SV=5                                 |
| <a href="#">STOM HUMAN</a>   | Erythrocyte band 7 integral membrane protein OS=Homo sapiens GN=STOM PE=1 SV=3                        |
| <a href="#">KINH HUMAN</a>   | Kinesin-1 heavy chain OS=Homo sapiens GN=KIF5B PE=1 SV=1                                              |

|                              |                                                                                                     |
|------------------------------|-----------------------------------------------------------------------------------------------------|
| <a href="#">ESPBI HUMAN</a>  | Epididymal sperm-binding protein 1 OS=Homo sapiens GN=ELSPBP1 PE=1 SV=2                             |
| <a href="#">MELPH HUMAN</a>  | Melanophilin OS=Homo sapiens GN=MLPH PE=1 SV=1                                                      |
| <a href="#">ANX11 HUMAN</a>  | Annexin A11 OS=Homo sapiens GN=ANXA11 PE=1 SV=1                                                     |
| <a href="#">HSP76 HUMAN</a>  | Heat shock 70 kDa protein 6 OS=Homo sapiens GN=HSPA6 PE=1 SV=2                                      |
| <a href="#">PPBT HUMAN</a>   | Alkaline phosphatase, tissue-nonspecific isozyme OS=Homo sapiens GN=ALPL PE=1 SV=4                  |
| <a href="#">MFGM HUMAN</a>   | Lactadherin OS=Homo sapiens GN=MFG8 PE=1 SV=2                                                       |
| <a href="#">IPSP HUMAN</a>   | Plasma serine protease inhibitor OS=Homo sapiens GN=SERPINA5 PE=1 SV=3                              |
| <a href="#">KAP2 HUMAN</a>   | cAMP-dependent protein kinase type II-alpha regulatory subunit OS=Homo sapiens GN=PRKAR2A PE=1 SV=2 |
| <a href="#">HSP72 HUMAN</a>  | Heat shock-related 70 kDa protein 2 OS=Homo sapiens GN=HSPA2 PE=1 SV=1                              |
| <a href="#">MYO5B HUMAN</a>  | Unconventional myosin-Vb OS=Homo sapiens GN=MYO5B PE=1 SV=3                                         |
| <a href="#">ANXA7 HUMAN</a>  | Annexin A7 OS=Homo sapiens GN=ANXA7 PE=1 SV=3                                                       |
| <a href="#">CBPO HUMAN</a>   | Carboxypeptidase O OS=Homo sapiens GN=CPO PE=2 SV=1                                                 |
| <a href="#">DAF HUMAN</a>    | Complement decay-accelerating factor OS=Homo sapiens GN=CD55 PE=1 SV=4                              |
| <a href="#">CBPM HUMAN</a>   | Carboxypeptidase M OS=Homo sapiens GN=CPM PE=1 SV=2                                                 |
| <a href="#">SEMG2 HUMAN</a>  | Semenogelin-2 OS=Homo sapiens GN=SEMG2 PE=1 SV=1                                                    |
| <a href="#">KCY HUMAN</a>    | UMP-CMP kinase OS=Homo sapiens GN=CMK1 PE=1 SV=3                                                    |
| <a href="#">GRP78 HUMAN</a>  | 78 kDa glucose-regulated protein OS=Homo sapiens GN=HSPA5 PE=1 SV=2                                 |
| <a href="#">RB27A HUMAN</a>  | Ras-related protein Rab-27A OS=Homo sapiens GN=RAB27A PE=1 SV=3                                     |
| <a href="#">MYO5A HUMAN</a>  | Unconventional myosin-Va OS=Homo sapiens GN=MYO5A PE=1 SV=2                                         |
| <a href="#">PLS1 HUMAN</a>   | Phospholipid scramblase 1 OS=Homo sapiens GN=PLSCR1 PE=1 SV=1                                       |
| <a href="#">ACTA HUMAN</a>   | Actin, aortic smooth muscle OS=Homo sapiens GN=ACTA2 PE=1 SV=1                                      |
| <a href="#">CAH4 HUMAN</a>   | Carbonic anhydrase 4 OS=Homo sapiens GN=CA4 PE=1 SV=2                                               |
| <a href="#">KCRB HUMAN</a>   | Creatine kinase B-type OS=Homo sapiens GN=CKB PE=1 SV=1                                             |
| <a href="#">RAC1 HUMAN</a>   | Ras-related C3 botulinum toxin substrate 1 OS=Homo sapiens GN=RAC1 PE=1 SV=1                        |
| <a href="#">VPS28 HUMAN</a>  | Vacuolar protein sorting-associated protein 28 homolog OS=Homo sapiens GN=VPS28 PE=1 SV=1           |
| <a href="#">TPIS HUMAN</a>   | Triosephosphate isomerase OS=Homo sapiens GN=TP11 PE=1 SV=3                                         |
| <a href="#">NIBAN HUMAN</a>  | Protein Niban OS=Homo sapiens GN=FAM129A PE=1 SV=1                                                  |
| <a href="#">TS101 HUMAN</a>  | Tumor susceptibility gene 101 protein OS=Homo sapiens GN=TSG101 PE=1 SV=2                           |
| <a href="#">RS27A HUMAN</a>  | Ubiquitin-40S ribosomal protein S27a OS=Homo sapiens GN=RPS27A PE=1 SV=2                            |
| <a href="#">KPCD HUMAN</a>   | Protein kinase C delta type OS=Homo sapiens GN=PRKCD PE=1 SV=2                                      |
| <a href="#">NDRG1 HUMAN</a>  | Protein NDRG1 OS=Homo sapiens GN=NDRG1 PE=1 SV=1                                                    |
| <a href="#">VPS37C HUMAN</a> | Vacuolar protein sorting-associated protein 37C OS=Homo sapiens GN=VPS37C PE=1 SV=2                 |
| <a href="#">APOC3 HUMAN</a>  | Apolipoprotein C-III OS=Homo sapiens GN=APOC3 PE=1 SV=1                                             |
| <a href="#">AT11B HUMAN</a>  | Probable phospholipid-transporting ATPase IF OS=Homo sapiens GN=ATP11B PE=1 SV=2                    |
| <a href="#">PRDX6 HUMAN</a>  | Peroxisomal protein 6 OS=Homo sapiens GN=PRDX6 PE=1 SV=3                                            |
| <a href="#">1433G HUMAN</a>  | 14-3-3 protein gamma OS=Homo sapiens GN=YWHAG PE=1 SV=2                                             |
| <a href="#">YBOX1 HUMAN</a>  | Nuclease-sensitive element-binding protein 1 OS=Homo sapiens GN=YBX1 PE=1 SV=3                      |
| <a href="#">DHSO HUMAN</a>   | Sorbitol dehydrogenase OS=Homo sapiens GN=SORD PE=1 SV=4                                            |
| <a href="#">CD63 HUMAN</a>   | CD63 antigen OS=Homo sapiens GN=CD63 PE=1 SV=2                                                      |
| <a href="#">LDHC HUMAN</a>   | L-lactate dehydrogenase C chain OS=Homo sapiens GN=LDHC PE=1 SV=4                                   |
| <a href="#">ENTPD3 HUMAN</a> | Ectonucleoside triphosphate diphosphohydrolase 3 OS=Homo sapiens GN=ENTPD3 PE=1 SV=2                |
| <a href="#">K1324 HUMAN</a>  | UPF0577 protein KIAA1324 OS=Homo sapiens GN=KIAA1324 PE=2 SV=2                                      |
| <a href="#">GPR64 HUMAN</a>  | G-protein coupled receptor 64 OS=Homo sapiens GN=GPR64 PE=1 SV=2                                    |
| <a href="#">CAPG HUMAN</a>   | Macrophage-capping protein OS=Homo sapiens GN=CAPG PE=1 SV=2                                        |
| <a href="#">PPAP HUMAN</a>   | Prostatic acid phosphatase OS=Homo sapiens GN=ACPP PE=1 SV=3                                        |
| <a href="#">SNTD HUMAN</a>   | 5'-nucleotidase OS=Homo sapiens GN=NT5E PE=1 SV=1                                                   |
| <a href="#">LDHB HUMAN</a>   | L-lactate dehydrogenase B chain OS=Homo sapiens GN=LDHB PE=1 SV=2                                   |
| <a href="#">1433B HUMAN</a>  | 14-3-3 protein beta/alpha OS=Homo sapiens GN=YWHAB PE=1 SV=3                                        |
| <a href="#">RAB3D HUMAN</a>  | Ras-related protein Rab-3D OS=Homo sapiens GN=RAB3D PE=1 SV=1                                       |
| <a href="#">CYFPI HUMAN</a>  | Cytoplasmic FMR1-interacting protein 1 OS=Homo sapiens GN=CYFIP1 PE=1 SV=1                          |
| <a href="#">DDAH2 HUMAN</a>  | N(G),N(G)-dimethylarginine dimethylaminohydrolase 2 OS=Homo sapiens GN=DDAH2 PE=1 SV=1              |
| <a href="#">GNA13 HUMAN</a>  | Guanine nucleotide-binding protein subunit alpha-13 OS=Homo sapiens GN=GNA13 PE=1 SV=2              |
| <a href="#">GGT1 HUMAN</a>   | Gamma-glutamyltranspeptidase 1 OS=Homo sapiens GN=GGT1 PE=1 SV=2                                    |
| <a href="#">TSN7 HUMAN</a>   | Tetraspanin-7 OS=Homo sapiens GN=TSPAN7 PE=1 SV=2                                                   |
| <a href="#">TERA HUMAN</a>   | Transitional endoplasmic reticulum ATPase OS=Homo sapiens GN=VCP PE=1 SV=4                          |
| <a href="#">CD38 HUMAN</a>   | ADP-ribosyl cyclase 1 OS=Homo sapiens GN=CD38 PE=1 SV=2                                             |
| <a href="#">CIB1 HUMAN</a>   | Calcium and integrin-binding protein 1 OS=Homo sapiens GN=CIB1 PE=1 SV=4                            |
| <a href="#">HEBP1 HUMAN</a>  | Heme-binding protein 1 OS=Homo sapiens GN=HEBP1 PE=1 SV=1                                           |
| <a href="#">MYO1D HUMAN</a>  | Unconventional myosin-Id OS=Homo sapiens GN=MYO1D PE=1 SV=2                                         |
| <a href="#">MYH9 HUMAN</a>   | Myosin-9 OS=Homo sapiens GN=MYH9 PE=1 SV=4                                                          |
| <a href="#">MYH11 HUMAN</a>  | Myosin-11 OS=Homo sapiens GN=MYH11 PE=1 SV=3                                                        |
| <a href="#">RAB1A HUMAN</a>  | Ras-related protein Rab-1A OS=Homo sapiens GN=RAB1A PE=1 SV=3                                       |
| <a href="#">NHRF2 HUMAN</a>  | Na(+)/H(+) exchange regulatory cofactor NHE-RF2 OS=Homo sapiens GN=SLC9A3R2 PE=1 SV=2               |
| <a href="#">G6PI HUMAN</a>   | Glucose-6-phosphate isomerase OS=Homo sapiens GN=GPI PE=1 SV=4                                      |
| <a href="#">GNAI1 HUMAN</a>  | Guanine nucleotide-binding protein G(i) subunit alpha-1 OS=Homo sapiens GN=GNAI1 PE=1 SV=2          |
| <a href="#">CD9 HUMAN</a>    | CD9 antigen OS=Homo sapiens GN=CD9 PE=1 SV=4                                                        |
| <a href="#">FLOT1 HUMAN</a>  | Flotillin-1 OS=Homo sapiens GN=FLOT1 PE=1 SV=3                                                      |
| <a href="#">S52A3 HUMAN</a>  | Solute carrier family 52, riboflavin transporter, member 3 OS=Homo sapiens GN=SLC52A3 PE=1 SV=4     |
| <a href="#">1433F HUMAN</a>  | 14-3-3 protein eta OS=Homo sapiens GN=YWHAH PE=1 SV=4                                               |
| <a href="#">1433S HUMAN</a>  | 14-3-3 protein sigma OS=Homo sapiens GN=SFN PE=1 SV=1                                               |
| <a href="#">RAB8A HUMAN</a>  | Ras-related protein Rab-8A OS=Homo sapiens GN=RAB8A PE=1 SV=1                                       |
| <a href="#">CNDP2 HUMAN</a>  | Cytosolic non-specific dipeptidase OS=Homo sapiens GN=CNDP2 PE=1 SV=2                               |
| <a href="#">PLS3 HUMAN</a>   | Phospholipid scramblase 3 OS=Homo sapiens GN=PLSCR3 PE=1 SV=2                                       |
| <a href="#">PCYT2 HUMAN</a>  | Ethanolamine-phosphate cytidyltransferase OS=Homo sapiens GN=PCYT2 PE=1 SV=1                        |
| <a href="#">MRP HUMAN</a>    | MARCKS-related protein OS=Homo sapiens GN=MARCKSL1 PE=1 SV=2                                        |
| <a href="#">FAS HUMAN</a>    | Fatty acid synthase OS=Homo sapiens GN=FASN PE=1 SV=3                                               |
| <a href="#">RB27B HUMAN</a>  | Ras-related protein Rab-27B OS=Homo sapiens GN=RAB27B PE=1 SV=4                                     |
| <a href="#">CLUS HUMAN</a>   | Clusterin OS=Homo sapiens GN=CLU PE=1 SV=1                                                          |

|                              |                                                                                                               |
|------------------------------|---------------------------------------------------------------------------------------------------------------|
| <a href="#">TSN31 HUMAN</a>  | Tetraspanin-31 OS=Homo sapiens GN=TSpan31 PE=2 SV=1                                                           |
| <a href="#">FXL20 HUMAN</a>  | F-box/LRR-repeat protein 20 OS=Homo sapiens GN=FBXL20 PE=1 SV=2                                               |
| <a href="#">TCPR1 HUMAN</a>  | Tectonin beta-propeller repeat-containing protein 1 OS=Homo sapiens GN=TECPR1 PE=1 SV=1                       |
| <a href="#">RAB3A HUMAN</a>  | Ras-related protein Rab-3A OS=Homo sapiens GN=RAB3A PE=1 SV=1                                                 |
| <a href="#">CAZA1 HUMAN</a>  | F-actin-capping protein subunit alpha-1 OS=Homo sapiens GN=CAPZA1 PE=1 SV=3                                   |
| <a href="#">WFDC8 HUMAN</a>  | WAP four-disulfide core domain protein 8 OS=Homo sapiens GN=WFDC8 PE=2 SV=2                                   |
| <a href="#">MT1G HUMAN</a>   | Metallothionein-1G OS=Homo sapiens GN=MT1G PE=1 SV=2                                                          |
| <a href="#">PROF2 HUMAN</a>  | Profilin-2 OS=Homo sapiens GN=PFN2 PE=1 SV=3                                                                  |
| <a href="#">ADAM7 HUMAN</a>  | Disintegrin and metalloproteinase domain-containing protein 7 OS=Homo sapiens GN=ADAM7 PE=1 SV=3              |
| <a href="#">PRSS8 HUMAN</a>  | Prostasin OS=Homo sapiens GN=PRSS8 PE=1 SV=1                                                                  |
| <a href="#">RAB8B HUMAN</a>  | Ras-related protein Rab-8B OS=Homo sapiens GN=RAB8B PE=1 SV=2                                                 |
| <a href="#">HORN HUMAN</a>   | Hornerin OS=Homo sapiens GN=HRNR PE=1 SV=2                                                                    |
| <a href="#">KIF5A HUMAN</a>  | Kinesin heavy chain isoform 5A OS=Homo sapiens GN=KIF5A PE=1 SV=2                                             |
| <a href="#">KIF5C HUMAN</a>  | Kinesin heavy chain isoform 5C OS=Homo sapiens GN=KIF5C PE=1 SV=1                                             |
| <a href="#">L433E HUMAN</a>  | 14-3-3 protein epsilon OS=Homo sapiens GN=YWHAE PE=1 SV=1                                                     |
| <a href="#">RRAS2 HUMAN</a>  | Ras-related protein R-Ras2 OS=Homo sapiens GN=RRAS2 PE=1 SV=1                                                 |
| <a href="#">K1C10 HUMAN</a>  | Keratin, type I cytoskeletal 10 OS=Homo sapiens GN=KRT10 PE=1 SV=6                                            |
| <a href="#">MT1E HUMAN</a>   | Metallothionein-1E OS=Homo sapiens GN=MT1E PE=1 SV=1                                                          |
| <a href="#">TBB2A HUMAN</a>  | Tubulin beta-2A chain OS=Homo sapiens GN=TUBB2A PE=1 SV=1                                                     |
| <a href="#">PSCA HUMAN</a>   | Prostate stem cell antigen OS=Homo sapiens GN=PSCA PE=1 SV=1                                                  |
| <a href="#">PODXL HUMAN</a>  | Podocalyxin OS=Homo sapiens GN=PODXL PE=1 SV=2                                                                |
| <a href="#">STXB2 HUMAN</a>  | Syntaxin-binding protein 2 OS=Homo sapiens GN=STXBP2 PE=1 SV=2                                                |
| <a href="#">RAB35 HUMAN</a>  | Ras-related protein Rab-35 OS=Homo sapiens GN=RAB35 PE=1 SV=1                                                 |
| <a href="#">GNA12 HUMAN</a>  | Guanine nucleotide-binding protein alpha-12 OS=Homo sapiens GN=GNA12 PE=1 SV=4                                |
| <a href="#">CTL2 HUMAN</a>   | Choline transporter-like protein 2 OS=Homo sapiens GN=SLC44A2 PE=1 SV=3                                       |
| <a href="#">DOP2 HUMAN</a>   | Protein dopey-2 OS=Homo sapiens GN=DOPEY2 PE=1 SV=5                                                           |
| <a href="#">PLSL HUMAN</a>   | Plastin-2 OS=Homo sapiens GN=LCP1 PE=1 SV=6                                                                   |
| <a href="#">HCK HUMAN</a>    | Tyrosine-protein kinase HCK OS=Homo sapiens GN=HCK PE=1 SV=5                                                  |
| <a href="#">FAM84A HUMAN</a> | Protein FAM84A OS=Homo sapiens GN=FAM84A PE=2 SV=2                                                            |
| <a href="#">K1C14 HUMAN</a>  | Keratin, type I cytoskeletal 14 OS=Homo sapiens GN=KRT14 PE=1 SV=4                                            |
| <a href="#">PTGR1 HUMAN</a>  | Prostaglandin reductase 1 OS=Homo sapiens GN=PTGR1 PE=1 SV=2                                                  |
| <a href="#">GBG12 HUMAN</a>  | Guanine nucleotide-binding protein G(I)/G(S)/G(O) subunit gamma-12 OS=Homo sapiens GN=GNG12 PE=1 SV=3         |
| <a href="#">RAB5C HUMAN</a>  | Ras-related protein Rab-5C OS=Homo sapiens GN=RAB5C PE=1 SV=2                                                 |
| <a href="#">PACN3 HUMAN</a>  | Protein kinase C and casein kinase substrate in neurons protein 3 OS=Homo sapiens GN=PACN3 PE=1 SV=2          |
| <a href="#">PHP14 HUMAN</a>  | 14 kDa phosphohistidine phosphatase OS=Homo sapiens GN=PHPT1 PE=1 SV=1                                        |
| <a href="#">LAMP1 HUMAN</a>  | Lysosome-associated membrane glycoprotein 1 OS=Homo sapiens GN=LAMP1 PE=1 SV=3                                |
| <a href="#">TSN9 HUMAN</a>   | Tetraspanin-9 OS=Homo sapiens GN=TSpan9 PE=1 SV=1                                                             |
| <a href="#">GBB1 HUMAN</a>   | Guanine nucleotide-binding protein G(I)/G(S)/G(T) subunit beta-1 OS=Homo sapiens GN=GNB1 PE=1 SV=3            |
| <a href="#">KPYM HUMAN</a>   | Pyruvate kinase isozymes M1/M2 OS=Homo sapiens GN=PKM PE=1 SV=4                                               |
| <a href="#">EZR1 HUMAN</a>   | Ezrin OS=Homo sapiens GN=EZR PE=1 SV=4                                                                        |
| <a href="#">SERC5 HUMAN</a>  | Serine incorporator 5 OS=Homo sapiens GN=SERINC5 PE=2 SV=1                                                    |
| <a href="#">STAT3 HUMAN</a>  | Signal transducer and activator of transcription 3 OS=Homo sapiens GN=STAT3 PE=1 SV=2                         |
| <a href="#">RAB3C HUMAN</a>  | Ras-related protein Rab-3C OS=Homo sapiens GN=RAB3C PE=2 SV=1                                                 |
| <a href="#">WDR48 HUMAN</a>  | WD repeat-containing protein 48 OS=Homo sapiens GN=WDR48 PE=1 SV=1                                            |
| <a href="#">CD47 HUMAN</a>   | Leukocyte surface antigen CD47 OS=Homo sapiens GN=CD47 PE=1 SV=1                                              |
| <a href="#">GMPPA HUMAN</a>  | Mannose-1-phosphate guanyltrtransferase alpha OS=Homo sapiens GN=GMPPA PE=1 SV=1                              |
| <a href="#">ANXA4 HUMAN</a>  | Annexin A4 OS=Homo sapiens GN=ANXA4 PE=1 SV=4                                                                 |
| <a href="#">S26A3 HUMAN</a>  | Chloride anion exchanger OS=Homo sapiens GN=SLC26A3 PE=1 SV=1                                                 |
| <a href="#">LY6K HUMAN</a>   | Lymphocyte antigen 6K OS=Homo sapiens GN=LY6K PE=1 SV=2                                                       |
| <a href="#">POTEE HUMAN</a>  | POTE ankyrin domain family member E OS=Homo sapiens GN=POTEE PE=1 SV=3                                        |
| <a href="#">DHAK HUMAN</a>   | Bifunctional ATP-dependent dihydroxyacetone kinase/FAD-AMP lyase (cyclizing) OS=Homo sapiens GN=DAK PE=1 SV=2 |
| <a href="#">G3P HUMAN</a>    | Glyceraldehyde-3-phosphate dehydrogenase OS=Homo sapiens GN=GAPDH PE=1 SV=3                                   |
| <a href="#">LRC47 HUMAN</a>  | Leucine-rich repeat-containing protein 47 OS=Homo sapiens GN=LRR47 PE=1 SV=1                                  |
| <a href="#">GSTO1 HUMAN</a>  | Glutathione S-transferase omega-1 OS=Homo sapiens GN=GSTO1 PE=1 SV=2                                          |
| <a href="#">CD59 HUMAN</a>   | CD59 glycoprotein OS=Homo sapiens GN=CD59 PE=1 SV=1                                                           |
| <a href="#">NPT2B HUMAN</a>  | Sodium-dependent phosphate transport protein 2B OS=Homo sapiens GN=SLC34A2 PE=1 SV=3                          |
| <a href="#">LDHA HUMAN</a>   | L-lactate dehydrogenase A chain OS=Homo sapiens GN=LDHA PE=1 SV=2                                             |
| <a href="#">PIP HUMAN</a>    | Prolactin-inducible protein OS=Homo sapiens GN=PIP PE=1 SV=1                                                  |
| <a href="#">WFDC2 HUMAN</a>  | WAP four-disulfide core domain protein 2 OS=Homo sapiens GN=WFDC2 PE=1 SV=2                                   |
| <a href="#">CC50A HUMAN</a>  | Cell cycle control protein 50A OS=Homo sapiens GN=TMEM30A PE=1 SV=1                                           |
| <a href="#">GDI2 HUMAN</a>   | Rab GDP dissociation inhibitor beta OS=Homo sapiens GN=GDI2 PE=1 SV=2                                         |
| <a href="#">CB072 HUMAN</a>  | Uncharacterized protein C2orf72 OS=Homo sapiens GN=C2orf72 PE=2 SV=2                                          |
| <a href="#">LELP1 HUMAN</a>  | Late cornified envelope-like proline-rich protein 1 OS=Homo sapiens GN=LELP1 PE=2 SV=1                        |
| <a href="#">FNTPA HUMAN</a>  | Protein farnesyltransferase/geranylgeranyltransferase type-1 subunit alpha OS=Homo sapiens GN=FNTPA PE=1 SV=1 |
| <a href="#">HPR1 HUMAN</a>   | Hypoxanthine-guanine phosphoribosyltransferase OS=Homo sapiens GN=HPR1 PE=1 SV=2                              |
| <a href="#">CHM2A HUMAN</a>  | Charged multivesicular body protein 2a OS=Homo sapiens GN=CHMP2A PE=1 SV=1                                    |
| <a href="#">K2C6B HUMAN</a>  | Keratin, type II cytoskeletal 6B OS=Homo sapiens GN=KRT6B PE=1 SV=5                                           |
| <a href="#">AGM1 HUMAN</a>   | Phosphoacetylglucosamine mutase OS=Homo sapiens GN=PGM3 PE=1 SV=1                                             |
| <a href="#">RAP1A HUMAN</a>  | Ras-related protein Rap-1A OS=Homo sapiens GN=RAP1A PE=1 SV=1                                                 |
| <a href="#">CAMP HUMAN</a>   | Cathelicidin antimicrobial peptide OS=Homo sapiens GN=CAMP PE=1 SV=1                                          |
| <a href="#">GBG5 HUMAN</a>   | Guanine nucleotide-binding protein G(I)/G(S)/G(O) subunit gamma-5 OS=Homo sapiens GN=GNG5 PE=1 SV=3           |
| <a href="#">TMC5 HUMAN</a>   | Transmembrane channel-like protein 5 OS=Homo sapiens GN=TMC5 PE=2 SV=3                                        |
| <a href="#">CRIS1 HUMAN</a>  | Cysteine-rich secretory protein 1 OS=Homo sapiens GN=CRISP1 PE=1 SV=1                                         |
| <a href="#">GNAL HUMAN</a>   | Guanine nucleotide-binding protein G(olf) subunit alpha OS=Homo sapiens GN=GNAL PE=1 SV=1                     |
| <a href="#">ENOB HUMAN</a>   | Beta-enolase OS=Homo sapiens GN=ENO3 PE=1 SV=5                                                                |
| <a href="#">SH3BP4 HUMAN</a> | SH3 domain-binding protein 4 OS=Homo sapiens GN=SH3BP4 PE=1 SV=1                                              |
| <a href="#">DCXR HUMAN</a>   | L-xylulose reductase OS=Homo sapiens GN=DCXR PE=1 SV=2                                                        |
| <a href="#">PEBP1 HUMAN</a>  | Phosphatidylethanolamine-binding protein 1 OS=Homo sapiens GN=PEBP1 PE=1 SV=3                                 |

|                              |                                                                                                       |
|------------------------------|-------------------------------------------------------------------------------------------------------|
| <a href="#">ZA2G HUMAN</a>   | Zinc-alpha-2-glycoprotein OS=Homo sapiens GN=AZGP1 PE=1 SV=2                                          |
| <a href="#">CHM4B HUMAN</a>  | Charged multivesicular body protein 4b OS=Homo sapiens GN=CHMP4B PE=1 SV=1                            |
| <a href="#">LDH6A HUMAN</a>  | L-lactate dehydrogenase A-like 6A OS=Homo sapiens GN=LDHAL6A PE=2 SV=1                                |
| <a href="#">PRIO HUMAN</a>   | Major prion protein OS=Homo sapiens GN=PRNP PE=1 SV=1                                                 |
| <a href="#">TCPO HUMAN</a>   | T-complex protein 1 subunit theta OS=Homo sapiens GN=CCT8 PE=1 SV=4                                   |
| <a href="#">LSR HUMAN</a>    | Lipolysis-stimulated lipoprotein receptor OS=Homo sapiens GN=LSR PE=1 SV=4                            |
| <a href="#">P20D2 HUMAN</a>  | Peptidase M20 domain-containing protein 2 OS=Homo sapiens GN=PM20D2 PE=1 SV=2                         |
| <a href="#">CTNB1 HUMAN</a>  | Catenin beta-1 OS=Homo sapiens GN=CTNNB1 PE=1 SV=1                                                    |
| <a href="#">PGAM1 HUMAN</a>  | Phosphoglycerate mutase 1 OS=Homo sapiens GN=PGAM1 PE=1 SV=2                                          |
| <a href="#">K1C25 HUMAN</a>  | Keratin, type I cytoskeletal 25 OS=Homo sapiens GN=KRT25 PE=1 SV=1                                    |
| <a href="#">K1C28 HUMAN</a>  | Keratin, type I cytoskeletal 28 OS=Homo sapiens GN=KRT28 PE=1 SV=2                                    |
| <a href="#">S10AB HUMAN</a>  | Protein S100-A11 OS=Homo sapiens GN=S100A11 PE=1 SV=2                                                 |
| <a href="#">RAB5A HUMAN</a>  | Ras-related protein Rab-5A OS=Homo sapiens GN=RAB5A PE=1 SV=2                                         |
| <a href="#">S26A2 HUMAN</a>  | Sulfate transporter OS=Homo sapiens GN=SLC26A2 PE=1 SV=2                                              |
| <a href="#">MT1F HUMAN</a>   | Metallothionein-1F OS=Homo sapiens GN=MT1F PE=1 SV=1                                                  |
| <a href="#">EIF5A1 HUMAN</a> | Eukaryotic translation initiation factor 5A-1 OS=Homo sapiens GN=EIF5A PE=1 SV=2                      |
| <a href="#">SYTL1 HUMAN</a>  | Synaptotagmin-like protein 1 OS=Homo sapiens GN=SYTL1 PE=1 SV=1                                       |
| <a href="#">KADI HUMAN</a>   | Adenylate kinase isoenzyme 1 OS=Homo sapiens GN=AK1 PE=1 SV=3                                         |
| <a href="#">RAB10 HUMAN</a>  | Ras-related protein Rab-10 OS=Homo sapiens GN=RAB10 PE=1 SV=1                                         |
| <a href="#">RAB15 HUMAN</a>  | Ras-related protein Rab-15 OS=Homo sapiens GN=RAB15 PE=1 SV=1                                         |
| <a href="#">GBB2 HUMAN</a>   | Guanine nucleotide-binding protein G(I)/G(S)/G(T) subunit beta-2 OS=Homo sapiens GN=GNB2 PE=1 SV=3    |
| <a href="#">MARCKS HUMAN</a> | Myristoylated alanine-rich C-kinase substrate OS=Homo sapiens GN=MARCKS PE=1 SV=4                     |
| <a href="#">TMM8A HUMAN</a>  | Transmembrane protein 8A OS=Homo sapiens GN=TMEM8A PE=1 SV=3                                          |
| <a href="#">HIN1L HUMAN</a>  | Putative HIN1-like protein OS=Homo sapiens GN=HIN1L PE=5 SV=1                                         |
| <a href="#">LG3BP HUMAN</a>  | Galectin-3-binding protein OS=Homo sapiens GN=LGALS3BP PE=1 SV=1                                      |
| <a href="#">ZCCHV HUMAN</a>  | Zinc finger CCCH-type antiviral protein 1 OS=Homo sapiens GN=ZC3HAV1 PE=1 SV=3                        |
| <a href="#">BCAS1 HUMAN</a>  | Breast carcinoma-amplified sequence 1 OS=Homo sapiens GN=BCAS1 PE=1 SV=2                              |
| <a href="#">CBR1 HUMAN</a>   | Carbonyl reductase [NADPH] 1 OS=Homo sapiens GN=CBR1 PE=1 SV=3                                        |
| <a href="#">DNJB2 HUMAN</a>  | DnaJ homolog subfamily B member 2 OS=Homo sapiens GN=DNAJB2 PE=1 SV=3                                 |
| <a href="#">TSN6 HUMAN</a>   | Tetraspanin-6 OS=Homo sapiens GN=TSN6 PE=1 SV=1                                                       |
| <a href="#">TXNL1 HUMAN</a>  | Thioredoxin-like protein 1 OS=Homo sapiens GN=TXNL1 PE=1 SV=3                                         |
| <a href="#">CD36 HUMAN</a>   | Platelet glycoprotein 4 OS=Homo sapiens GN=CD36 PE=1 SV=2                                             |
| <a href="#">UBL3 HUMAN</a>   | Ubiquitin-like protein 3 OS=Homo sapiens GN=UBL3 PE=1 SV=1                                            |
| <a href="#">TR10C HUMAN</a>  | Tumor necrosis factor receptor superfamily member 10C OS=Homo sapiens GN=TNFRSF10C PE=1 SV=3          |
| <a href="#">CD14 HUMAN</a>   | Monocyte differentiation antigen CD14 OS=Homo sapiens GN=CD14 PE=1 SV=2                               |
| <a href="#">ALDR HUMAN</a>   | Aldose reductase OS=Homo sapiens GN=AKR1B1 PE=1 SV=3                                                  |
| <a href="#">K22O HUMAN</a>   | Keratin, type II cytoskeletal 2 oral OS=Homo sapiens GN=KRT76 PE=1 SV=2                               |
| <a href="#">K2C4 HUMAN</a>   | Keratin, type II cytoskeletal 4 OS=Homo sapiens GN=KRT4 PE=1 SV=4                                     |
| <a href="#">INADL HUMAN</a>  | InaD-like protein OS=Homo sapiens GN=INADL PE=1 SV=3                                                  |
| <a href="#">MDHC HUMAN</a>   | Malate dehydrogenase, cytoplasmic OS=Homo sapiens GN=MDH1 PE=1 SV=4                                   |
| <a href="#">COLL1 HUMAN</a>  | Colipase-like protein 1 OS=Homo sapiens GN=CLPSL1 PE=2 SV=1                                           |
| <a href="#">MYOF HUMAN</a>   | Myoferlin OS=Homo sapiens GN=MYOF PE=1 SV=1                                                           |
| <a href="#">APOD HUMAN</a>   | Apolipoprotein D OS=Homo sapiens GN=APOD PE=1 SV=1                                                    |
| <a href="#">PTTG HUMAN</a>   | Pituitary tumor-transforming gene 1 protein-interacting protein OS=Homo sapiens GN=PTTG1IP PE=1 SV=1  |
| <a href="#">BAIP2 HUMAN</a>  | Brain-specific angiogenesis inhibitor 1-associated protein 2 OS=Homo sapiens GN=BAIP2 PE=1 SV=1       |
| <a href="#">AT8A2 HUMAN</a>  | Probable phospholipid-transporting ATPase IB OS=Homo sapiens GN=ATP8A2 PE=2 SV=2                      |
| <a href="#">SORT HUMAN</a>   | Sortilin OS=Homo sapiens GN=SORT1 PE=1 SV=3                                                           |
| <a href="#">P2RX4 HUMAN</a>  | P2X purinoceptor 4 OS=Homo sapiens GN=P2RX4 PE=1 SV=2                                                 |
| <a href="#">REPS2 HUMAN</a>  | RalBP1-associated Eps domain-containing protein 2 OS=Homo sapiens GN=REPS2 PE=1 SV=2                  |
| <a href="#">SMIM1 HUMAN</a>  | Small integral membrane protein 1 OS=Homo sapiens GN=SMIM1 PE=1 SV=1                                  |
| <a href="#">LFG3 HUMAN</a>   | Protein lifeguard 3 OS=Homo sapiens GN=TMBIM1 PE=1 SV=2                                               |
| <a href="#">SORCN HUMAN</a>  | Sorcিন OS=Homo sapiens GN=SRI PE=1 SV=1                                                               |
| <a href="#">PGK2 HUMAN</a>   | Phosphoglycerate kinase 2 OS=Homo sapiens GN=PGK2 PE=1 SV=3                                           |
| <a href="#">GNA11 HUMAN</a>  | Guanine nucleotide-binding protein subunit alpha-11 OS=Homo sapiens GN=GNA11 PE=1 SV=2                |
| <a href="#">SO2A1 HUMAN</a>  | Solute carrier organic anion transporter family member 2A1 OS=Homo sapiens GN=SLCO2A1 PE=1 SV=2       |
| <a href="#">HYES HUMAN</a>   | Bifunctional epoxide hydrolase 2 OS=Homo sapiens GN=EPHX2 PE=1 SV=2                                   |
| <a href="#">GTR5 HUMAN</a>   | Solute carrier family 2, facilitated glucose transporter member 5 OS=Homo sapiens GN=SLC2A5 PE=1 SV=1 |
| <a href="#">CLIC1 HUMAN</a>  | Chloride intracellular channel protein 1 OS=Homo sapiens GN=CLIC1 PE=1 SV=4                           |
| <a href="#">ZDHHC2 HUMAN</a> | Palmitoyltransferase ZDHHC2 OS=Homo sapiens GN=ZDHHC2 PE=2 SV=1                                       |
| <a href="#">DCD HUMAN</a>    | Dermcidin OS=Homo sapiens GN=DCD PE=1 SV=2                                                            |
| <a href="#">CC181 HUMAN</a>  | Coiled-coil domain-containing protein 181 OS=Homo sapiens GN=CCDC181 PE=2 SV=1                        |
| <a href="#">TR134 HUMAN</a>  | Tripartite motif-containing protein 34 OS=Homo sapiens GN=TRIM34 PE=1 SV=2                            |
| <a href="#">RRAS HUMAN</a>   | Ras-related protein R-Ras OS=Homo sapiens GN=RRAS PE=1 SV=1                                           |
| <a href="#">PRDX1 HUMAN</a>  | Peroxiredoxin-1 OS=Homo sapiens GN=PRDX1 PE=1 SV=1                                                    |
| <a href="#">PRS8 HUMAN</a>   | 26S protease regulatory subunit 8 OS=Homo sapiens GN=PSMC5 PE=1 SV=1                                  |
| <a href="#">K12L4 HUMAN</a>  | Killer cell immunoglobulin-like receptor 2DL4 OS=Homo sapiens GN=KIR2DL4 PE=1 SV=3                    |
| <a href="#">GNAQ HUMAN</a>   | Guanine nucleotide-binding protein G(q) subunit alpha OS=Homo sapiens GN=GNAQ PE=1 SV=4               |
| <a href="#">RAB14 HUMAN</a>  | Ras-related protein Rab-14 OS=Homo sapiens GN=RAB14 PE=1 SV=4                                         |
| <a href="#">IGSF21 HUMAN</a> | Immunoglobulin superfamily member 21 OS=Homo sapiens GN=IGSF21 PE=2 SV=1                              |
| <a href="#">TSN8 HUMAN</a>   | Tetraspanin-8 OS=Homo sapiens GN=TSN8 PE=1 SV=1                                                       |
| <a href="#">VIGLN HUMAN</a>  | Vigilin OS=Homo sapiens GN=HDLBP PE=1 SV=2                                                            |
| <a href="#">MIF HUMAN</a>    | Macrophage migration inhibitory factor OS=Homo sapiens GN=MIF PE=1 SV=4                               |
| <a href="#">PLST HUMAN</a>   | Plastin-3 OS=Homo sapiens GN=PLS3 PE=1 SV=4                                                           |
| <a href="#">PTPRJ HUMAN</a>  | Receptor-type tyrosine-protein phosphatase eta OS=Homo sapiens GN=PTPRJ PE=1 SV=3                     |
| <a href="#">FLOT2 HUMAN</a>  | Flotillin-2 OS=Homo sapiens GN=FLOT2 PE=1 SV=2                                                        |
| <a href="#">RB39B HUMAN</a>  | Ras-related protein Rab-39B OS=Homo sapiens GN=RAB39B PE=1 SV=1                                       |
| <a href="#">RAB6A HUMAN</a>  | Ras-related protein Rab-6A OS=Homo sapiens GN=RAB6A PE=1 SV=3                                         |
| <a href="#">RB33B HUMAN</a>  | Ras-related protein Rab-33B OS=Homo sapiens GN=RAB33B PE=1 SV=1                                       |

|                                |                                                                                                                        |
|--------------------------------|------------------------------------------------------------------------------------------------------------------------|
| <a href="#">GP2_HUMAN</a>      | Pancreatic secretory granule membrane major glycoprotein GP2 OS=Homo sapiens GN=GP2 PE=2 SV=3                          |
| <a href="#">PEPD_HUMAN</a>     | Xaa-Pro dipeptidase OS=Homo sapiens GN=PEPD PE=1 SV=3                                                                  |
| <a href="#">SGTA_HUMAN</a>     | Small glutamine-rich tetraatricopeptide repeat-containing protein alpha OS=Homo sapiens GN=SGTA PE=1 SV=1              |
| <a href="#">PPME1_HUMAN</a>    | Protein phosphatase methylesterase 1 OS=Homo sapiens GN=PPME1 PE=1 SV=3                                                |
| <a href="#">AT1A2_HUMAN</a>    | Sodium/potassium-transporting ATPase subunit alpha-2 OS=Homo sapiens GN=ATP1A2 PE=1 SV=1                               |
| <a href="#">FKBP1A_HUMAN</a>   | Peptidyl-prolyl cis-trans isomerase FKBP1A OS=Homo sapiens GN=FKBP1A PE=1 SV=2                                         |
| <a href="#">ANO7_HUMAN</a>     | Anoctamin-7 OS=Homo sapiens GN=ANO7 PE=1 SV=2                                                                          |
| <a href="#">UBP14_HUMAN</a>    | Ubiquitin carboxyl-terminal hydrolase 14 OS=Homo sapiens GN=USP14 PE=1 SV=3                                            |
| <a href="#">GNAZ_HUMAN</a>     | Guanine nucleotide-binding protein G(z) subunit alpha OS=Homo sapiens GN=GNAZ PE=2 SV=3                                |
| <a href="#">IMP1_HUMAN</a>     | Inositol monophosphatase 1 OS=Homo sapiens GN=IMP1 PE=1 SV=1                                                           |
| <a href="#">NPDC1_HUMAN</a>    | Neural proliferation differentiation and control protein 1 OS=Homo sapiens GN=NPDC1 PE=1 SV=2                          |
| <a href="#">PTPRB_HUMAN</a>    | Receptor-type tyrosine-protein phosphatase beta OS=Homo sapiens GN=PTPRB PE=1 SV=3                                     |
| <a href="#">SUIS_HUMAN</a>     | Sucrase-isomaltase, intestinal OS=Homo sapiens GN=SI PE=1 SV=6                                                         |
| <a href="#">PRDX2_HUMAN</a>    | Peroxiredoxin-2 OS=Homo sapiens GN=PRDX2 PE=1 SV=5                                                                     |
| <a href="#">AL9A1_HUMAN</a>    | 4-trimethylaminobutyraldehyde dehydrogenase OS=Homo sapiens GN=ALDH9A1 PE=1 SV=3                                       |
| <a href="#">CK052_HUMAN</a>    | Uncharacterized protein Cllorf52 OS=Homo sapiens GN=Cllorf52 PE=2 SV=2                                                 |
| <a href="#">NCALD_HUMAN</a>    | Neurocalcin-delta OS=Homo sapiens GN=NCALD PE=2 SV=2                                                                   |
| <a href="#">MEGF9_HUMAN</a>    | Multiple epidermal growth factor-like domains protein 9 OS=Homo sapiens GN=MEGF9 PE=2 SV=3                             |
| <a href="#">COL12_HUMAN</a>    | Collectin-12 OS=Homo sapiens GN=COL12 PE=1 SV=3                                                                        |
| <a href="#">TMEM106B_HUMAN</a> | Transmembrane protein 106B OS=Homo sapiens GN=TMEM106B PE=1 SV=2                                                       |
| <a href="#">GSH1_HUMAN</a>     | Glutamate--cysteine ligase catalytic subunit OS=Homo sapiens GN=GCLC PE=1 SV=2                                         |
| <a href="#">ENOG_HUMAN</a>     | Gamma-enolase OS=Homo sapiens GN=ENO2 PE=1 SV=3                                                                        |
| <a href="#">ALDH3_HUMAN</a>    | Aldehyde dehydrogenase family 1 member A3 OS=Homo sapiens GN=ALDH1A3 PE=1 SV=2                                         |
| <a href="#">SUCB2_HUMAN</a>    | Succinyl-CoA ligase [GDP-forming] subunit beta, mitochondrial OS=Homo sapiens GN=SUCB2 PE=1 SV=2                       |
| <a href="#">AT1A4_HUMAN</a>    | Sodium/potassium-transporting ATPase subunit alpha-4 OS=Homo sapiens GN=ATP1A4 PE=1 SV=3                               |
| <a href="#">TBC1D10A_HUMAN</a> | TBC1 domain family member 10A OS=Homo sapiens GN=TBC1D10A PE=1 SV=1                                                    |
| <a href="#">LPP1_HUMAN</a>     | Lipid phosphate phosphohydrolase 1 OS=Homo sapiens GN=PPAP2A PE=1 SV=1                                                 |
| <a href="#">LSAMP_HUMAN</a>    | Limbic system-associated membrane protein OS=Homo sapiens GN=LSAMP PE=1 SV=2                                           |
| <a href="#">ENPP3_HUMAN</a>    | Ectonucleotide pyrophosphatase/phosphodiesterase family member 3 OS=Homo sapiens GN=ENPP3 PE=1 SV=2                    |
| <a href="#">LAMP2_HUMAN</a>    | Lysosome-associated membrane glycoprotein 2 OS=Homo sapiens GN=LAMP2 PE=1 SV=2                                         |
| <a href="#">PRDX5_HUMAN</a>    | Peroxiredoxin-5, mitochondrial OS=Homo sapiens GN=PRDX5 PE=1 SV=4                                                      |
| <a href="#">IQGAP2_HUMAN</a>   | Ras GTPase-activating-like protein IQGAP2 OS=Homo sapiens GN=IQGAP2 PE=1 SV=4                                          |
| <a href="#">ACLY_HUMAN</a>     | ATP-citrate synthase OS=Homo sapiens GN=ACLY PE=1 SV=3                                                                 |
| <a href="#">DSP_HUMAN</a>      | Desmoplakin OS=Homo sapiens GN=DSP PE=1 SV=3                                                                           |
| <a href="#">SPINT3_HUMAN</a>   | Kunitz-type protease inhibitor 3 OS=Homo sapiens GN=SPINT3 PE=2 SV=3                                                   |
| <a href="#">WDR1_HUMAN</a>     | WD repeat-containing protein 1 OS=Homo sapiens GN=WDR1 PE=1 SV=4                                                       |
| <a href="#">COPT1_HUMAN</a>    | High affinity copper uptake protein 1 OS=Homo sapiens GN=SLC31A1 PE=1 SV=1                                             |
| <a href="#">ANXA6_HUMAN</a>    | Annexin A6 OS=Homo sapiens GN=ANXA6 PE=1 SV=3                                                                          |
| <a href="#">ANO6_HUMAN</a>     | Anoctamin-6 OS=Homo sapiens GN=ANO6 PE=1 SV=2                                                                          |
| <a href="#">ISP1_HUMAN</a>     | Type I inositol 1,4,5-trisphosphate 5-phosphatase OS=Homo sapiens GN=INPP5A PE=2 SV=1                                  |
| <a href="#">GMPR1_HUMAN</a>    | GMP reductase 1 OS=Homo sapiens GN=GMPR1 PE=1 SV=1                                                                     |
| <a href="#">LFA3_HUMAN</a>     | Lymphocyte function-associated antigen 3 OS=Homo sapiens GN=CD58 PE=1 SV=1                                             |
| <a href="#">ISK2_HUMAN</a>     | Serine protease inhibitor Kazal-type 2 OS=Homo sapiens GN=SPINK2 PE=1 SV=2                                             |
| <a href="#">AQP5_HUMAN</a>     | Aquaporin-5 OS=Homo sapiens GN=AQP5 PE=1 SV=1                                                                          |
| <a href="#">GSHB_HUMAN</a>     | Glutathione synthetase OS=Homo sapiens GN=GSS PE=1 SV=1                                                                |
| <a href="#">MAL2_HUMAN</a>     | Protein MAL2 OS=Homo sapiens GN=MAL2 PE=1 SV=1                                                                         |
| <a href="#">SLC5A1_HUMAN</a>   | Sodium/glucose cotransporter 1 OS=Homo sapiens GN=SLC5A1 PE=1 SV=1                                                     |
| <a href="#">NEFH_HUMAN</a>     | Neurofilament heavy polypeptide OS=Homo sapiens GN=NEFH PE=1 SV=4                                                      |
| <a href="#">MAP2K2_HUMAN</a>   | Dual specificity mitogen-activated protein kinase 2 OS=Homo sapiens GN=MAP2K2 PE=1 SV=1                                |
| <a href="#">RAB13_HUMAN</a>    | Ras-related protein Rab-13 OS=Homo sapiens GN=RAB13 PE=1 SV=1                                                          |
| <a href="#">2AAA_HUMAN</a>     | Serine/threonine-protein phosphatase 2A 65 kDa regulatory subunit A alpha isoform OS=Homo sapiens GN=PPP2R1A PE=1 SV=4 |
| <a href="#">TUBA1A_HUMAN</a>   | Tubulin alpha-1A chain OS=Homo sapiens GN=TUBA1A PE=1 SV=1                                                             |
| <a href="#">ZNF263_HUMAN</a>   | Zinc finger protein 263 OS=Homo sapiens GN=ZNF263 PE=2 SV=2                                                            |
| <a href="#">CHMP5_HUMAN</a>    | Charged multivesicular body protein 5 OS=Homo sapiens GN=CHMP5 PE=1 SV=1                                               |
| <a href="#">RNH1_HUMAN</a>     | Ribonuclease inhibitor OS=Homo sapiens GN=RNH1 PE=1 SV=2                                                               |
| <a href="#">SYT7_HUMAN</a>     | Synaptotagmin-7 OS=Homo sapiens GN=SYT7 PE=1 SV=3                                                                      |
| <a href="#">EEF1A1_HUMAN</a>   | Elongation factor 1-alpha 1 OS=Homo sapiens GN=EEF1A1 PE=1 SV=1                                                        |
| <a href="#">VAS1_HUMAN</a>     | V-type proton ATPase subunit S1 OS=Homo sapiens GN=ATP6A1 PE=1 SV=2                                                    |
| <a href="#">GSTP1_HUMAN</a>    | Glutathione S-transferase P OS=Homo sapiens GN=GSTP1 PE=1 SV=2                                                         |
| <a href="#">TLN1_HUMAN</a>     | Talin-1 OS=Homo sapiens GN=TLN1 PE=1 SV=3                                                                              |
| <a href="#">QOR_HUMAN</a>      | Quinone oxidoreductase OS=Homo sapiens GN=CRYZ PE=1 SV=1                                                               |
| <a href="#">TCPD_HUMAN</a>     | T-complex protein 1 subunit delta OS=Homo sapiens GN=CCT4 PE=1 SV=4                                                    |
| <a href="#">GPC4_HUMAN</a>     | Glypican-4 OS=Homo sapiens GN=GPC4 PE=1 SV=4                                                                           |
| <a href="#">COL4A5_HUMAN</a>   | Collagen alpha-5(IV) chain OS=Homo sapiens GN=COL4A5 PE=1 SV=2                                                         |
| <a href="#">LIN7C_HUMAN</a>    | Protein lin-7 homolog C OS=Homo sapiens GN=LIN7C PE=1 SV=1                                                             |
| <a href="#">KGP2_HUMAN</a>     | cGMP-dependent protein kinase 2 OS=Homo sapiens GN=PRKG2 PE=1 SV=1                                                     |
| <a href="#">CHMP1B_HUMAN</a>   | Charged multivesicular body protein 1b OS=Homo sapiens GN=CHMP1B PE=1 SV=1                                             |
| <a href="#">MVB12B_HUMAN</a>   | Multivesicular body subunit 12B OS=Homo sapiens GN=MVB12B PE=1 SV=2                                                    |
| <a href="#">SYTL4_HUMAN</a>    | Synaptotagmin-like protein 4 OS=Homo sapiens GN=SYTL4 PE=1 SV=2                                                        |
| <a href="#">SDCBP_HUMAN</a>    | Syntenin-1 OS=Homo sapiens GN=SDCBP PE=1 SV=1                                                                          |
| <a href="#">HID1_HUMAN</a>     | Protein HID1 OS=Homo sapiens GN=HID1 PE=1 SV=1                                                                         |
| <a href="#">ZG16B_HUMAN</a>    | Zymogen granule protein 16 homolog B OS=Homo sapiens GN=ZG16B PE=1 SV=3                                                |
| <a href="#">NPC2_HUMAN</a>     | Epididymal secretory protein E1 OS=Homo sapiens GN=NPC2 PE=1 SV=1                                                      |
| <a href="#">KLK3_HUMAN</a>     | Prostate-specific antigen OS=Homo sapiens GN=KLK3 PE=1 SV=2                                                            |
| <a href="#">CNP37_HUMAN</a>    | 2',3'-cyclic-nucleotide 3'-phosphodiesterase OS=Homo sapiens GN=CNP37 PE=1 SV=2                                        |
| <a href="#">CKAP5_HUMAN</a>    | Cytoskeleton-associated protein 5 OS=Homo sapiens GN=CKAP5 PE=1 SV=3                                                   |
| <a href="#">FERM2_HUMAN</a>    | Fermitin family homolog 2 OS=Homo sapiens GN=FERM2 PE=1 SV=1                                                           |
| <a href="#">SERA_HUMAN</a>     | D-3-phosphoglycerate dehydrogenase OS=Homo sapiens GN=PHGDH PE=1 SV=4                                                  |

|                               |                                                                                                          |
|-------------------------------|----------------------------------------------------------------------------------------------------------|
| <a href="#">TALDO HUMAN</a>   | Transaldolase OS=Homo sapiens GN=TALDO1 PE=1 SV=2                                                        |
| <a href="#">CTL4 HUMAN</a>    | Choline transporter-like protein 4 OS=Homo sapiens GN=SLC44A4 PE=2 SV=2                                  |
| <a href="#">ANXA5 HUMAN</a>   | Annexin A5 OS=Homo sapiens GN=ANXA5 PE=1 SV=2                                                            |
| <a href="#">GTR3 HUMAN</a>    | Solute carrier family 2, facilitated glucose transporter member 3 OS=Homo sapiens GN=SLC2A3 PE=1 SV=1    |
| <a href="#">LANC1 HUMAN</a>   | LanC-like protein 1 OS=Homo sapiens GN=LANCL1 PE=1 SV=1                                                  |
| <a href="#">CHM2B HUMAN</a>   | Charged multivesicular body protein 2b OS=Homo sapiens GN=CHMP2B PE=1 SV=1                               |
| <a href="#">DB126 HUMAN</a>   | Beta-defensin 126 OS=Homo sapiens GN=DEFB126 PE=2 SV=2                                                   |
| <a href="#">LEG3 HUMAN</a>    | Galectin-3 OS=Homo sapiens GN=LGALS3 PE=1 SV=5                                                           |
| <a href="#">GBG4 HUMAN</a>    | Guanine nucleotide-binding protein G(I)/G(S)/G(O) subunit gamma-4 OS=Homo sapiens GN=GNG4 PE=1 SV=1      |
| <a href="#">PROM2 HUMAN</a>   | Prominin-2 OS=Homo sapiens GN=PROM2 PE=1 SV=1                                                            |
| <a href="#">ZNT4 HUMAN</a>    | Zinc transporter 4 OS=Homo sapiens GN=SLC30A4 PE=2 SV=2                                                  |
| <a href="#">AT8B1 HUMAN</a>   | Probable phospholipid-transporting ATPase IC OS=Homo sapiens GN=ATP8B1 PE=1 SV=3                         |
| <a href="#">TM63A HUMAN</a>   | Transmembrane protein 63A OS=Homo sapiens GN=TMEM63A PE=2 SV=3                                           |
| <a href="#">SERC1 HUMAN</a>   | Serine incorporator 1 OS=Homo sapiens GN=SERINC1 PE=1 SV=1                                               |
| <a href="#">PROF1 HUMAN</a>   | Profilin-1 OS=Homo sapiens GN=PFN1 PE=1 SV=2                                                             |
| <a href="#">RAB44 HUMAN</a>   | Ras-related protein Rab-44 OS=Homo sapiens GN=RAB44 PE=3 SV=3                                            |
| <a href="#">ITCH HUMAN</a>    | E3 ubiquitin-protein ligase Itchy homolog OS=Homo sapiens GN=ITCH PE=1 SV=2                              |
| <a href="#">MYO1B HUMAN</a>   | Unconventional myosin-Ib OS=Homo sapiens GN=MYO1B PE=1 SV=3                                              |
| <a href="#">K2C7 HUMAN</a>    | Keratin, type II cytoskeletal 7 OS=Homo sapiens GN=KRT7 PE=1 SV=5                                        |
| <a href="#">DDAH1 HUMAN</a>   | N(G),N(G)-dimethylarginine dimethylaminohydrolase 1 OS=Homo sapiens GN=DDAH1 PE=1 SV=3                   |
| <a href="#">FUCM HUMAN</a>    | Fucose mutarotase OS=Homo sapiens GN=FUOM PE=1 SV=2                                                      |
| <a href="#">YES HUMAN</a>     | Tyrosine-protein kinase Yes OS=Homo sapiens GN=YES1 PE=1 SV=3                                            |
| <a href="#">UBA1 HUMAN</a>    | Ubiquitin-like modifier-activating enzyme 1 OS=Homo sapiens GN=UBA1 PE=1 SV=3                            |
| <a href="#">RHOA HUMAN</a>    | Transforming protein RhoA OS=Homo sapiens GN=RHOA PE=1 SV=1                                              |
| <a href="#">ABCB6 HUMAN</a>   | ATP-binding cassette sub-family B member 6, mitochondrial OS=Homo sapiens GN=ABCB6 PE=1 SV=1             |
| <a href="#">MGRN1 HUMAN</a>   | E3 ubiquitin-protein ligase MGRN1 OS=Homo sapiens GN=MGRN1 PE=1 SV=2                                     |
| <a href="#">NCKP1 HUMAN</a>   | Nck-associated protein 1 OS=Homo sapiens GN=NCKAP1 PE=1 SV=1                                             |
| <a href="#">UBR2 HUMAN</a>    | E3 ubiquitin-protein ligase UBR2 OS=Homo sapiens GN=UBR2 PE=1 SV=1                                       |
| <a href="#">AP1B1 HUMAN</a>   | AP-1 complex subunit beta-1 OS=Homo sapiens GN=AP1B1 PE=1 SV=2                                           |
| <a href="#">RALB HUMAN</a>    | Ras-related protein Ral-B OS=Homo sapiens GN=RALB PE=1 SV=1                                              |
| <a href="#">VINC HUMAN</a>    | Vinculin OS=Homo sapiens GN=VCL PE=1 SV=4                                                                |
| <a href="#">TNAP3 HUMAN</a>   | Tumor necrosis factor alpha-induced protein 3 OS=Homo sapiens GN=TNFAIP3 PE=1 SV=1                       |
| <a href="#">CYTC HUMAN</a>    | Cystatin-C OS=Homo sapiens GN=CST3 PE=1 SV=1                                                             |
| <a href="#">PTHB1 HUMAN</a>   | Protein PTHB1 OS=Homo sapiens GN=BBS9 PE=1 SV=1                                                          |
| <a href="#">SARG HUMAN</a>    | Specifically androgen-regulated gene protein OS=Homo sapiens GN=SARG PE=1 SV=2                           |
| <a href="#">VAT1 HUMAN</a>    | Synaptic vesicle membrane protein VAT-1 homolog OS=Homo sapiens GN=VAT1 PE=1 SV=2                        |
| <a href="#">SPTN2 HUMAN</a>   | Spectrin beta chain, non-erythrocytic 2 OS=Homo sapiens GN=SPTN2 PE=1 SV=3                               |
| <a href="#">KI609 HUMAN</a>   | TLD domain-containing protein KIAA1609 OS=Homo sapiens GN=KIAA1609 PE=1 SV=2                             |
| <a href="#">EPM2A HUMAN</a>   | Laforin OS=Homo sapiens GN=EPM2A PE=1 SV=2                                                               |
| <a href="#">SRP54 HUMAN</a>   | Signal recognition particle 54 kDa protein OS=Homo sapiens GN=SRP54 PE=1 SV=1                            |
| <a href="#">SYCC HUMAN</a>    | Cysteine--tRNA ligase, cytoplasmic OS=Homo sapiens GN=CARS PE=1 SV=3                                     |
| <a href="#">RNF14 HUMAN</a>   | E3 ubiquitin-protein ligase RNF14 OS=Homo sapiens GN=RNF14 PE=1 SV=1                                     |
| <a href="#">MPP10 HUMAN</a>   | U3 small nucleolar ribonucleoprotein protein MPP10 OS=Homo sapiens GN=MPHOSPH10 PE=1 SV=2                |
| <a href="#">UBP30 HUMAN</a>   | Ubiquitin carboxyl-terminal hydrolase 30 OS=Homo sapiens GN=USP30 PE=1 SV=1                              |
| <a href="#">SMAG2 HUMAN</a>   | Protein Smaug homolog 2 OS=Homo sapiens GN=SAMD4B PE=1 SV=1                                              |
| <a href="#">AIMP1 HUMAN</a>   | Aminoacyl tRNA synthase complex-interacting multifunctional protein 1 OS=Homo sapiens GN=AIMP1 PE=1 SV=2 |
| <a href="#">NRAP HUMAN</a>    | Nebulin-related-anchoring protein OS=Homo sapiens GN=NRAP PE=2 SV=2                                      |
| <a href="#">SPRE HUMAN</a>    | Sepiapterin reductase OS=Homo sapiens GN=SPR PE=1 SV=1                                                   |
| <a href="#">ABHD14B HUMAN</a> | Alpha/beta hydrolase domain-containing protein 14B OS=Homo sapiens GN=ABHD14B PE=1 SV=1                  |
| <a href="#">ZBTB32 HUMAN</a>  | Zinc finger and BTB domain-containing protein 32 OS=Homo sapiens GN=ZBTB32 PE=1 SV=1                     |
| <a href="#">CD151 HUMAN</a>   | CD151 antigen OS=Homo sapiens GN=CD151 PE=1 SV=3                                                         |
| <a href="#">TSPAN11 HUMAN</a> | Tetraspanin-11 OS=Homo sapiens GN=TSPAN11 PE=2 SV=2                                                      |
| <a href="#">FLA HUMAN</a>     | Filaggrin OS=Homo sapiens GN=FLG PE=1 SV=3                                                               |
| <a href="#">CRLD2 HUMAN</a>   | Cysteine-rich secretory protein LCCL domain-containing 2 OS=Homo sapiens GN=CRISPLD2 PE=1 SV=1           |
| <a href="#">TR49C HUMAN</a>   | Tripartite motif-containing protein 49C OS=Homo sapiens GN=TRIM49C PE=2 SV=1                             |
| <a href="#">FAM73B HUMAN</a>  | Protein FAM73B OS=Homo sapiens GN=FAM73B PE=1 SV=1                                                       |
| <a href="#">TMED2 HUMAN</a>   | Transmembrane emp24 domain-containing protein 2 OS=Homo sapiens GN=TMED2 PE=1 SV=1                       |
| <a href="#">BASI HUMAN</a>    | Basigin OS=Homo sapiens GN=BSG PE=1 SV=2                                                                 |
| <a href="#">UNC80 HUMAN</a>   | Protein unc-80 homolog OS=Homo sapiens GN=UNC80 PE=2 SV=2                                                |
| <a href="#">FAT2 HUMAN</a>    | Protocadherin Fat 2 OS=Homo sapiens GN=FAT2 PE=1 SV=2                                                    |
| <a href="#">PPIA HUMAN</a>    | Peptidyl-prolyl cis-trans isomerase A OS=Homo sapiens GN=PPIA PE=1 SV=2                                  |
| <a href="#">WNT3A HUMAN</a>   | Protein Wnt-3a OS=Homo sapiens GN=WNT3A PE=1 SV=2                                                        |
| <a href="#">CS018 HUMAN</a>   | Uncharacterized protein C19orf18 OS=Homo sapiens GN=C19orf18 PE=2 SV=1                                   |
| <a href="#">ANXA3 HUMAN</a>   | Annexin A3 OS=Homo sapiens GN=ANXA3 PE=1 SV=3                                                            |
| <a href="#">FAM43A HUMAN</a>  | Protein FAM43A OS=Homo sapiens GN=FAM43A PE=2 SV=2                                                       |
| <a href="#">AT2B3 HUMAN</a>   | Plasma membrane calcium-transporting ATPase 3 OS=Homo sapiens GN=ATP2B3 PE=1 SV=3                        |
| <a href="#">AT2B4 HUMAN</a>   | Plasma membrane calcium-transporting ATPase 4 OS=Homo sapiens GN=ATP2B4 PE=1 SV=2                        |
| <a href="#">BCOR HUMAN</a>    | BCL-6 corepressor OS=Homo sapiens GN=BCOR PE=1 SV=1                                                      |
| <a href="#">TBCB HUMAN</a>    | Tubulin-folding cofactor B OS=Homo sapiens GN=TBCB PE=1 SV=2                                             |
| <a href="#">SH3R3 HUMAN</a>   | SH3 domain-containing RING finger protein 3 OS=Homo sapiens GN=SH3R3 PE=1 SV=2                           |
| <a href="#">PRAX HUMAN</a>    | Periaxin OS=Homo sapiens GN=PRX PE=1 SV=2                                                                |
| <a href="#">INTS1 HUMAN</a>   | Integrator complex subunit 1 OS=Homo sapiens GN=INTS1 PE=1 SV=2                                          |
| <a href="#">FAM83H HUMAN</a>  | Protein FAM83H OS=Homo sapiens GN=FAM83H PE=1 SV=3                                                       |
| <a href="#">MTMR6 HUMAN</a>   | Myotubularin-related protein 6 OS=Homo sapiens GN=MTMR6 PE=1 SV=3                                        |
| <a href="#">SRCAP HUMAN</a>   | Helicase SRCAP OS=Homo sapiens GN=SRCAP PE=1 SV=3                                                        |
| <a href="#">WDR35 HUMAN</a>   | WD repeat-containing protein 35 OS=Homo sapiens GN=WDR35 PE=1 SV=3                                       |
| <a href="#">POD1 HUMAN</a>    | DNA polymerase delta catalytic subunit OS=Homo sapiens GN=POLD1 PE=1 SV=2                                |
| <a href="#">PMS2P11 HUMAN</a> | Putative postmeiotic segregation increased 2-like protein 11 OS=Homo sapiens GN=PMS2P11 PE=5 SV=1        |

[CC170 HUMAN](#) Coiled-coil domain-containing protein 170 OS=Homo sapiens GN=CCDC170 PE=2 SV=3  
[CR3L2 HUMAN](#) Cyclic AMP-responsive element-binding protein 3-like protein 2 OS=Homo sapiens GN=CREB3L2 PE=1 SV=3  
[NUDC2 HUMAN](#) NudC domain-containing protein 2 OS=Homo sapiens GN=NUDC2 PE=1 SV=1  
[RPC3 HUMAN](#) DNA-directed RNA polymerase III subunit RPC3 OS=Homo sapiens GN=POLR3C PE=1 SV=1  
[UBP24 HUMAN](#) Ubiquitin carboxyl-terminal hydrolase 24 OS=Homo sapiens GN=USP24 PE=1 SV=3  
[SNT3B HUMAN](#) 7-methylguanosine phosphate-specific 5'-nucleotidase OS=Homo sapiens GN=NT5C3B PE=1 SV=4  
[OR4A5 HUMAN](#) Olfactory receptor 4A5 OS=Homo sapiens GN=OR4A5 PE=2 SV=4  
[GPR11 HUMAN](#) GLIPR1-like protein 1 OS=Homo sapiens GN=GLIPR1L1 PE=1 SV=2  
[BRD7 HUMAN](#) Bromodomain-containing protein 7 OS=Homo sapiens GN=BRD7 PE=1 SV=1  
[VKGC HUMAN](#) Vitamin K-dependent gamma-carboxylase OS=Homo sapiens GN=GGCX PE=1 SV=2  
[HLBP3 HUMAN](#) HCLS1-binding protein 3 OS=Homo sapiens GN=HSLBP3 PE=1 SV=1  
[MIPEP HUMAN](#) Mitochondrial intermediate peptidase OS=Homo sapiens GN=MIPEP PE=1 SV=2  
[MDR3 HUMAN](#) Multidrug resistance protein 3 OS=Homo sapiens GN=ABCB4 PE=1 SV=2  
[F151A HUMAN](#) Protein FAM151A OS=Homo sapiens GN=FAM151A PE=2 SV=2  
[QSOX1 HUMAN](#) Sulfhydryl oxidase 1 OS=Homo sapiens GN=QSOX1 PE=1 SV=3  
[CTR4 HUMAN](#) Cationic amino acid transporter 4 OS=Homo sapiens GN=SLC7A4 PE=2 SV=3  
[AP4A HUMAN](#) Bis(5'-nucleosyl)-tetrphosphatase [asymmetrical] OS=Homo sapiens GN=NUDT2 PE=1 SV=3  
[AT2B2 HUMAN](#) Plasma membrane calcium-transporting ATPase 2 OS=Homo sapiens GN=ATP2B2 PE=1 SV=2  
[KANK1 HUMAN](#) KN motif and ankyrin repeat domain-containing protein 1 OS=Homo sapiens GN=KANK1 PE=1 SV=3  
[RHG35 HUMAN](#) Rho GTPase-activating protein 35 OS=Homo sapiens GN=ARHGAP35 PE=1 SV=3  
[RUFY3 HUMAN](#) Protein RUFY3 OS=Homo sapiens GN=RUFY3 PE=1 SV=1  
[STK4 HUMAN](#) Serine/threonine-protein kinase 4 OS=Homo sapiens GN=STK4 PE=1 SV=2  
[CCD41 HUMAN](#) Coiled-coil domain-containing protein 41 OS=Homo sapiens GN=CCDC41 PE=2 SV=2  
[TXLNB HUMAN](#) Beta-taxilin OS=Homo sapiens GN=TXLNB PE=1 SV=3  
[DYST HUMAN](#) Dystonin OS=Homo sapiens GN=DST PE=1 SV=4  
[F117B HUMAN](#) Protein FAM117B OS=Homo sapiens GN=FAM117B PE=1 SV=2  
[MA1B1 HUMAN](#) Endoplasmic reticulum mannosyl-oligosaccharide 1,2-alpha-mannosidase OS=Homo sapiens GN=MAN1B1 PE=1 SV=2  
[TRY3 HUMAN](#) Trypsin-3 OS=Homo sapiens GN=PRSS3 PE=1 SV=2  
[WDR67 HUMAN](#) WD repeat-containing protein 67 OS=Homo sapiens GN=WDR67 PE=2 SV=2  
[INP4B HUMAN](#) Type II inositol 3,4-bisphosphate 4-phosphatase OS=Homo sapiens GN=INPP4B PE=2 SV=4  
[M3K9 HUMAN](#) Mitogen-activated protein kinase kinase kinase 9 OS=Homo sapiens GN=MAP3K9 PE=1 SV=3  
[PD2R2 HUMAN](#) Prostaglandin D2 receptor 2 OS=Homo sapiens GN=PTGDR2 PE=1 SV=3  
[K1671 HUMAN](#) Uncharacterized protein KIAA1671 OS=Homo sapiens GN=KIAA1671 PE=1 SV=2  
[DPYD HUMAN](#) Dihydropyrimidine dehydrogenase [NADP(+)] OS=Homo sapiens GN=DPYD PE=1 SV=2  
[PADI6 HUMAN](#) Protein-arginine deiminase type-6 OS=Homo sapiens GN=PADI6 PE=1 SV=3  
[RRP36 HUMAN](#) Ribosomal RNA processing protein 36 homolog OS=Homo sapiens GN=RRP36 PE=1 SV=1  
[UBP54 HUMAN](#) Inactive ubiquitin carboxyl-terminal hydrolase 54 OS=Homo sapiens GN=USP54 PE=1 SV=4  
[NEBL HUMAN](#) Nebulette OS=Homo sapiens GN=NEBL PE=1 SV=1  
[TIM21 HUMAN](#) Mitochondrial import inner membrane translocase subunit Tim21 OS=Homo sapiens GN=TIMM21 PE=1 SV=1  
[LINES HUMAN](#) Protein Lines homolog OS=Homo sapiens GN=LINS PE=2 SV=2  
[POP1 HUMAN](#) Ribonucleases P/MRP protein subunit POP1 OS=Homo sapiens GN=POP1 PE=1 SV=2  
[PEG3 HUMAN](#) Paternally-expressed gene 3 protein OS=Homo sapiens GN=PEG3 PE=1 SV=1  
[DJB14 HUMAN](#) DnaJ homolog subfamily B member 14 OS=Homo sapiens GN=DNAJB14 PE=2 SV=1  
[PITM2 HUMAN](#) Membrane-associated phosphatidylinositol transfer protein 2 OS=Homo sapiens GN=PITPNM2 PE=1 SV=1  
[CMBL HUMAN](#) Carboxymethylglutaminylase homolog OS=Homo sapiens GN=CMBL PE=1 SV=1  
[KDM2A HUMAN](#) Lysine-specific demethylase 2A OS=Homo sapiens GN=KDM2A PE=1 SV=3  
[ZCCHC4 HUMAN](#) Zinc finger CCHC domain-containing protein 4 OS=Homo sapiens GN=ZCCHC4 PE=1 SV=3  
[EXD2 HUMAN](#) Exonuclease 3'-5' domain-containing protein 2 OS=Homo sapiens GN=EXD2 PE=1 SV=2  
[TILB HUMAN](#) Protein TILB homolog OS=Homo sapiens GN=LRRC6 PE=1 SV=3  
[I22R1 HUMAN](#) Interleukin-22 receptor subunit alpha-1 OS=Homo sapiens GN=IL22RA1 PE=1 SV=1  
[ANKH1 HUMAN](#) Ankyrin repeat and KH domain-containing protein 1 OS=Homo sapiens GN=ANKHD1 PE=1 SV=1  
[LRC45 HUMAN](#) Leucine-rich repeat-containing protein 45 OS=Homo sapiens GN=LRRC45 PE=2 SV=1  
[ACOC HUMAN](#) Cytoplasmic aconitate hydratase OS=Homo sapiens GN=ACO1 PE=1 SV=3  
[PARI HUMAN](#) PCNA-interacting partner OS=Homo sapiens GN=PARPBP PE=1 SV=3

|                                                      | Swissprot2013 | Decoy | False discovery rate |
|------------------------------------------------------|---------------|-------|----------------------|
| Peptide matches above identity threshold             | 2017          | 132   | 6.54 %               |
| Peptide matches above homology or identity threshold | 2030          | 145   | 7.14 %               |

## Select Summary Report

|                               |                     |                                  |
|-------------------------------|---------------------|----------------------------------|
| Select Summary (protein hits) |                     | <a href="#">Help</a>             |
| Significance threshold p<     | Max. number of hits |                                  |
| Standard scoring              | MudPIT scoring      | Ions score or expect cut-off     |
| Show pop-ups                  | Suppress pop-ups    | Sort unassigned Decreasing Score |
|                               |                     | Require bold red                 |

1. [AMPN\\_HUMAN](#) Mass: 109870 Score: 5650 Queries matched: 129 emPAI: 2.88

Aminopeptidase N OS=Homo sapiens GN=ANPEP PE=1 SV=4

| Query                | Observed | Mr(expt) | Mr(calc) | ppm   | Miss | Score | Expect   | Rank | Peptide                                                                                                                                                                                                                                                                                                                                                                                                                         |
|----------------------|----------|----------|----------|-------|------|-------|----------|------|---------------------------------------------------------------------------------------------------------------------------------------------------------------------------------------------------------------------------------------------------------------------------------------------------------------------------------------------------------------------------------------------------------------------------------|
| <a href="#">413</a>  | 443.76   | 885.51   | 885.50   | 3.45  | 0    | 70    | 1e-006   | 1    | K.IQTQLQR.D <a href="#">399</a> <a href="#">400</a> <a href="#">401</a> <a href="#">402</a> <a href="#">403</a> <a href="#">404</a> <a href="#">405</a> <a href="#">407</a> <a href="#">408</a> <a href="#">409</a> <a href="#">410</a> <a href="#">411</a> <a href="#">412</a>                                                                                                                                                 |
| <a href="#">480</a>  | 451.25   | 900.49   | 900.49   | 2.31  | 0    | 73    | 3.2e-007 | 1    | R.ALEQALEK.T                                                                                                                                                                                                                                                                                                                                                                                                                    |
| <a href="#">551</a>  | 455.72   | 909.43   | 909.43   | 1.16  | 0    | 39    | 0.00066  | 1    | R.SEVYGPVK.N                                                                                                                                                                                                                                                                                                                                                                                                                    |
| <a href="#">575</a>  | 457.26   | 912.51   | 912.51   | 1.53  | 1    | 27    | 0.014    | 1    | M.AKGFYISK.S <a href="#">573</a>                                                                                                                                                                                                                                                                                                                                                                                                |
| <a href="#">614</a>  | 463.72   | 925.42   | 925.42   | -3.92 | 0    | (5)   | 0.95     | 1    | R.SEVYGPVK.N                                                                                                                                                                                                                                                                                                                                                                                                                    |
| <a href="#">711</a>  | 472.28   | 942.54   | 942.53   | 8.47  | 0    | 32    | 0.0041   | 1    | K.ELWILNR.Y <a href="#">710</a>                                                                                                                                                                                                                                                                                                                                                                                                 |
| <a href="#">753</a>  | 479.28   | 956.55   | 956.54   | 5.81  | 0    | 63    | 4.9e-006 | 1    | K.QASNGVLR.I <a href="#">751</a>                                                                                                                                                                                                                                                                                                                                                                                                |
| <a href="#">1066</a> | 507.80   | 1013.59  | 1013.59  | 1.99  | 0    | 30    | 0.0091   | 1    | R.SIQLPTTVR.D                                                                                                                                                                                                                                                                                                                                                                                                                   |
| <a href="#">1067</a> | 507.81   | 1013.60  | 1013.60  | 1.16  | 1    | 53    | 1.6e-005 | 1    | R.KIQTQLQR.D                                                                                                                                                                                                                                                                                                                                                                                                                    |
| <a href="#">1453</a> | 542.74   | 1083.47  | 1083.47  | 1.53  | 0    | (58)  | 4.7e-006 | 1    | R.SEYMEGNVR.K <a href="#">1450</a> <a href="#">1452</a> <a href="#">1454</a>                                                                                                                                                                                                                                                                                                                                                    |
| <a href="#">1530</a> | 550.74   | 1099.46  | 1099.46  | -0.76 | 0    | 65    | 4.1e-007 | 1    | R.SEYMEGNVR.K <a href="#">1529</a> <a href="#">1531</a> <a href="#">1532</a> <a href="#">1533</a> <a href="#">1534</a>                                                                                                                                                                                                                                                                                                          |
| <a href="#">1646</a> | 561.31   | 1120.61  | 1120.60  | 6.06  | 0    | 62    | 5.2e-006 | 1    | R.DHSAIPVINR.A <a href="#">1645</a>                                                                                                                                                                                                                                                                                                                                                                                             |
| <a href="#">1693</a> | 565.82   | 1129.63  | 1129.63  | -0.97 | 1    | 68    | 9.2e-007 | 1    | R.ALEQALEKTK.A                                                                                                                                                                                                                                                                                                                                                                                                                  |
| <a href="#">1950</a> | 585.29   | 1168.57  | 1168.57  | -0.27 | 0    | 49    | 0.0001   | 1    | R.GVGGSQPPDIDK.T <a href="#">1946</a> <a href="#">1947</a> <a href="#">1948</a> <a href="#">1951</a>                                                                                                                                                                                                                                                                                                                            |
| <a href="#">2103</a> | 601.83   | 1201.64  | 1201.64  | -0.27 | 0    | (74)  | 3.7e-007 | 1    | K.DLTALSNMLPK.G <a href="#">2104</a>                                                                                                                                                                                                                                                                                                                                                                                            |
| <a href="#">2153</a> | 606.79   | 1211.57  | 1211.56  | 5.71  | 1    | (38)  | 0.00086  | 1    | R.SEYMEGNVRK.V <a href="#">2152</a>                                                                                                                                                                                                                                                                                                                                                                                             |
| <a href="#">2187</a> | 609.83   | 1217.64  | 1217.63  | 2.90  | 0    | 76    | 2.9e-007 | 1    | K.DLTALSNMLPK.G <a href="#">2186</a> <a href="#">2188</a>                                                                                                                                                                                                                                                                                                                                                                       |
| <a href="#">2212</a> | 612.77   | 1223.52  | 1223.52  | 1.03  | 0    | 69    | 3.3e-007 | 1    | R.VNYDEENWR.K <a href="#">2213</a>                                                                                                                                                                                                                                                                                                                                                                                              |
| <a href="#">2225</a> | 613.35   | 1224.68  | 1224.67  | 3.77  | 0    | 72    | 2.8e-007 | 1    | K.EATDVIIHHSK.K <a href="#">2223</a> <a href="#">2224</a>                                                                                                                                                                                                                                                                                                                                                                       |
| <a href="#">2234</a> | 614.78   | 1227.56  | 1227.56  | -0.07 | 1    | 38    | 0.00055  | 1    | R.SEYMEGNVRK.V <a href="#">2233</a> <a href="#">2235</a> <a href="#">2236</a>                                                                                                                                                                                                                                                                                                                                                   |
| <a href="#">2299</a> | 619.32   | 1236.62  | 1236.62  | 2.20  | 0    | (26)  | 0.022    | 1    | K.DLMVLNDVYR.V                                                                                                                                                                                                                                                                                                                                                                                                                  |
| <a href="#">2389</a> | 627.31   | 1252.61  | 1252.61  | 0.58  | 0    | 60    | 1e-005   | 1    | K.DLMVLNDVYR.V                                                                                                                                                                                                                                                                                                                                                                                                                  |
| <a href="#">2467</a> | 635.27   | 1268.53  | 1268.53  | -1.43 | 0    | 103   | 8.6e-011 | 1    | K.DNEETGFGSGTR.A <a href="#">2460</a> <a href="#">2461</a> <a href="#">2462</a> <a href="#">2463</a> <a href="#">2464</a> <a href="#">2465</a> <a href="#">2466</a> <a href="#">2468</a> <a href="#">2469</a> <a href="#">2470</a> <a href="#">2471</a> <a href="#">2472</a> <a href="#">2473</a>                                                                                                                               |
| <a href="#">2690</a> | 657.36   | 1312.71  | 1312.71  | -1.29 | 1    | 52    | 4.2e-005 | 1    | R.GLYVFKGSSTVR.F <a href="#">2691</a>                                                                                                                                                                                                                                                                                                                                                                                           |
| <a href="#">2750</a> | 664.79   | 1327.56  | 1327.56  | 1.67  | 0    | 65    | 5.2e-007 | 1    | K.SFPCFDEPAMK.A                                                                                                                                                                                                                                                                                                                                                                                                                 |
| <a href="#">2823</a> | 672.79   | 1343.56  | 1343.55  | 6.16  | 0    | (45)  | 4e-005   | 1    | K.SFPCFDEPAMK.A <a href="#">2822</a>                                                                                                                                                                                                                                                                                                                                                                                            |
| <a href="#">2870</a> | 676.81   | 1351.61  | 1351.62  | -1.68 | 1    | 65    | 1.6e-006 | 1    | R.VNYDEENWRK.I                                                                                                                                                                                                                                                                                                                                                                                                                  |
| <a href="#">2919</a> | 681.34   | 1360.68  | 1360.68  | -1.20 | 0    | 132   | 5.9e-013 | 1    | K.VVATTQQAADAR.K <a href="#">2908</a> <a href="#">2909</a> <a href="#">2910</a> <a href="#">2911</a> <a href="#">2912</a> <a href="#">2913</a> <a href="#">2914</a> <a href="#">2915</a> <a href="#">2916</a> <a href="#">2917</a> <a href="#">2918</a> <a href="#">2920</a> <a href="#">2921</a> <a href="#">2922</a> <a href="#">2923</a> <a href="#">2924</a> <a href="#">2925</a> <a href="#">2926</a> <a href="#">2927</a> |
| <a href="#">2988</a> | 689.34   | 1376.67  | 1376.67  | 0.91  | 0    | (129) | 8.3e-013 | 1    | K.VVATTQQAADAR.K <a href="#">2979</a> <a href="#">2980</a> <a href="#">2981</a> <a href="#">2982</a> <a href="#">2983</a> <a href="#">2985</a> <a href="#">2986</a> <a href="#">2987</a> <a href="#">2989</a> <a href="#">2990</a> <a href="#">2991</a>                                                                                                                                                                         |
| <a href="#">3211</a> | 722.90   | 1443.79  | 1443.78  | 2.38  | 0    | 25    | 0.019    | 1    | R.VTLRPYLTPNDR.G                                                                                                                                                                                                                                                                                                                                                                                                                |
| <a href="#">3246</a> | 728.83   | 1455.65  | 1455.65  | -2.32 | 1    | 74    | 1.4e-007 | 1    | R.KSFPCFDEPAMK.A                                                                                                                                                                                                                                                                                                                                                                                                                |
| <a href="#">3279</a> | 732.37   | 1462.73  | 1462.72  | 6.82  | 0    | 73    | 4.5e-007 | 1    | R.QQDYWLIDVR.A <a href="#">3278</a>                                                                                                                                                                                                                                                                                                                                                                                             |
| <a href="#">3300</a> | 734.40   | 1466.78  | 1466.78  | -0.88 | 0    | 61    | 4.4e-006 | 1    | R.YLSYTLNPDILR.K                                                                                                                                                                                                                                                                                                                                                                                                                |
| <a href="#">3360</a> | 745.39   | 1488.77  | 1488.77  | -1.74 | 1    | (98)  | 1.5e-009 | 1    | R.KVVATTQQAADAR.K <a href="#">3361</a> <a href="#">3363</a>                                                                                                                                                                                                                                                                                                                                                                     |
| <a href="#">3416</a> | 753.39   | 1504.76  | 1504.77  | -5.73 | 1    | 116   | 1.9e-011 | 1    | R.KVVATTQQAADAR.K <a href="#">3417</a> <a href="#">3418</a> <a href="#">3419</a>                                                                                                                                                                                                                                                                                                                                                |
| <a href="#">4090</a> | 862.92   | 1723.83  | 1723.83  | 2.31  | 0    | 83    | 3.5e-008 | 1    | R.ENSLLDPLSSSSSNK.E                                                                                                                                                                                                                                                                                                                                                                                                             |
| <a href="#">4619</a> | 663.98   | 1988.93  | 1988.93  | 0.16  | 0    | 27    | 0.011    | 1    | K.QWMENPNNPIHPNLR.S                                                                                                                                                                                                                                                                                                                                                                                                             |
| <a href="#">4666</a> | 1005.49  | 2008.97  | 2008.97  | -0.88 | 1    | 95    | 2.2e-009 | 1    | R.ENSLLDPLSSSSSNKER.V <a href="#">4668</a>                                                                                                                                                                                                                                                                                                                                                                                      |

2. [DPP4\\_HUMAN](#) Mass: 88907 Score: 3597 Queries matched: 98 emPAI: 2.40

Dipeptidyl peptidase 4 OS=Homo sapiens GN=DPP4 PE=1 SV=2

| Query               | Observed | Mr(expt) | Mr(calc) | ppm   | Miss | Score | Expect   | Rank | Peptide                                                                                                                                                                                                               |
|---------------------|----------|----------|----------|-------|------|-------|----------|------|-----------------------------------------------------------------------------------------------------------------------------------------------------------------------------------------------------------------------|
| <a href="#">44</a>  | 405.70   | 809.38   | 809.37   | 2.50  | 0    | 44    | 0.00018  | 1    | K.MGFVDNK.R                                                                                                                                                                                                           |
| <a href="#">49</a>  | 406.18   | 810.35   | 810.35   | 0.23  | 0    | 73    | 1.5e-007 | 1    | R.GSGYQGDK.I <a href="#">48</a> <a href="#">50</a> <a href="#">51</a> <a href="#">52</a> <a href="#">53</a>                                                                                                           |
| <a href="#">130</a> | 413.69   | 825.37   | 825.37   | -1.68 | 0    | (34)  | 0.0014   | 1    | K.MGFVDNK.R                                                                                                                                                                                                           |
| <a href="#">266</a> | 427.74   | 853.46   | 853.46   | 2.49  | 0    | 39    | 0.0007   | 1    | K.IMHAINR.R                                                                                                                                                                                                           |
| <a href="#">274</a> | 428.75   | 855.48   | 855.48   | -1.78 | 0    | 69    | 6e-007   | 1    | K.AGAVNPTVK.F <a href="#">269</a> <a href="#">270</a> <a href="#">271</a> <a href="#">272</a> <a href="#">273</a> <a href="#">275</a> <a href="#">276</a> <a href="#">277</a> <a href="#">278</a> <a href="#">279</a> |
| <a href="#">389</a> | 442.72   | 883.42   | 883.41   | 7.48  | 0    | 51    | 5.9e-005 | 1    | K.DCTFITK.G <a href="#">387</a> <a href="#">388</a>                                                                                                                                                                   |
| <a href="#">421</a> | 444.75   | 887.48   | 887.47   | 5.37  | 0    | 47    | 0.00031  | 1    | R.QLITEER.I <a href="#">420</a>                                                                                                                                                                                       |
| <a href="#">581</a> | 458.28   | 914.54   | 914.53   | 4.63  | 0    | 45    | 0.00024  | 1    | R.ISLQWLR.R                                                                                                                                                                                                           |
| <a href="#">588</a> | 459.74   | 917.46   | 917.45   | 6.24  | 0    | 38    | 0.0015   | 1    | R.WNCLVAR.Q <a href="#">587</a>                                                                                                                                                                                       |
| <a href="#">767</a> | 480.29   | 958.56   | 958.56   | 1.82  | 1    | 47    | 0.00012  | 1    | K.TVRVPYPK.A                                                                                                                                                                                                          |



|                      |        |         |         |       |   |      |          |   |                          |                                                                                                                                                                                                                   |
|----------------------|--------|---------|---------|-------|---|------|----------|---|--------------------------|-------------------------------------------------------------------------------------------------------------------------------------------------------------------------------------------------------------------|
| <a href="#">804</a>  | 483.75 | 965.48  | 965.48  | 0.92  | 1 | (48) | 0.00015  | 1 | K.MGFVDNKR.I             | <a href="#">807</a>                                                                                                                                                                                               |
| <a href="#">813</a>  | 484.26 | 966.50  | 966.50  | 0.92  | 0 | 48   | 9.3e-005 | 1 | K.IQLSDYTK.V             | <a href="#">812</a> <a href="#">814</a>                                                                                                                                                                           |
| <a href="#">886</a>  | 491.74 | 981.47  | 981.47  | 0.42  | 1 | 51   | 5.4e-005 | 1 | K.MGFVDNKR.I             |                                                                                                                                                                                                                   |
| <a href="#">1026</a> | 504.71 | 1007.41 | 1007.42 | -0.93 | 0 | 94   | 9.5e-010 | 1 | K.GTDDATADSR.K           | <a href="#">1023</a> <a href="#">1024</a> <a href="#">1025</a> <a href="#">1027</a> <a href="#">1028</a> <a href="#">1029</a> <a href="#">1030</a> <a href="#">1031</a> <a href="#">1032</a> <a href="#">1033</a> |
| <a href="#">1130</a> | 515.28 | 1028.55 | 1028.54 | 7.93  | 0 | 65   | 3.1e-006 | 1 | K.CGIAVAPVSR.W           | <a href="#">1129</a>                                                                                                                                                                                              |
| <a href="#">1427</a> | 540.77 | 1079.52 | 1079.52 | -0.52 | 0 | 69   | 9.1e-007 | 1 | K.IISNEEGYR.H            | <a href="#">1429</a>                                                                                                                                                                                              |
| <a href="#">1479</a> | 544.79 | 1087.57 | 1087.57 | 0.07  | 0 | 42   | 0.00066  | 1 | K.IEPNLPYSR.I            | <a href="#">1478</a> <a href="#">1480</a>                                                                                                                                                                         |
| <a href="#">1553</a> | 552.28 | 1102.55 | 1102.55 | 3.91  | 0 | 82   | 6.4e-008 | 1 | R.VLEDNSALDK.M           | <a href="#">1548</a> <a href="#">1549</a> <a href="#">1550</a> <a href="#">1551</a> <a href="#">1552</a> <a href="#">1554</a>                                                                                     |
| <a href="#">1979</a> | 588.30 | 1174.58 | 1174.58 | -1.87 | 0 | (72) | 5e-007   | 1 | K.MLQNVQMPSK.K           |                                                                                                                                                                                                                   |
| <a href="#">2041</a> | 596.30 | 1190.58 | 1190.58 | -2.50 | 0 | 73   | 3.5e-007 | 1 | K.MLQNVQMPSK.K           | <a href="#">2043</a> <a href="#">2044</a> <a href="#">2048</a> <a href="#">2049</a> <a href="#">2050</a> <a href="#">2054</a>                                                                                     |
| <a href="#">2053</a> | 596.30 | 1190.58 | 1190.58 | 1.91  | 0 | (65) | 2.3e-006 | 1 | K.MLQNVQMPSK.K           | <a href="#">2045</a> <a href="#">2046</a> <a href="#">2047</a> <a href="#">2051</a> <a href="#">2052</a> <a href="#">2055</a>                                                                                     |
| <a href="#">2123</a> | 604.29 | 1206.57 | 1206.57 | -0.88 | 0 | (62) | 4e-006   | 1 | K.MLQNVQMPSK.K           | <a href="#">2118</a> <a href="#">2119</a> <a href="#">2120</a> <a href="#">2121</a> <a href="#">2122</a> <a href="#">2124</a> <a href="#">2125</a> <a href="#">2126</a>                                           |
| <a href="#">2459</a> | 634.79 | 1267.56 | 1267.55 | 8.17  | 0 | 60   | 4.2e-006 | 1 | R.CQYYSVSFSK.E           | <a href="#">2458</a>                                                                                                                                                                                              |
| <a href="#">2878</a> | 677.33 | 1352.64 | 1352.64 | -1.60 | 0 | 5    | 2.2      | 1 | R.WISDHEVLYK.Q           |                                                                                                                                                                                                                   |
| <a href="#">3326</a> | 739.35 | 1476.68 | 1476.67 | 8.22  | 0 | 76   | 1.5e-007 | 1 | K.VTCLSCELNPER.C         | <a href="#">3324</a> <a href="#">3325</a>                                                                                                                                                                         |
| <a href="#">3389</a> | 749.39 | 1496.77 | 1496.77 | 1.79  | 0 | 47   | 0.00015  | 1 | K.LAYVWNNDIYVK.I         |                                                                                                                                                                                                                   |
| <a href="#">3433</a> | 755.83 | 1509.64 | 1509.64 | 2.27  | 0 | 72   | 1.4e-007 | 1 | R.WEYDSVYTER.Y           |                                                                                                                                                                                                                   |
| <a href="#">3643</a> | 789.39 | 1576.77 | 1576.77 | -1.70 | 0 | 104  | 3.1e-010 | 1 | R.LGTFEVEDQIEAAR.Q       | <a href="#">3644</a>                                                                                                                                                                                              |
| <a href="#">4107</a> | 578.63 | 1732.88 | 1732.87 | 2.97  | 1 | 30   | 0.007    | 1 | R.RLGFTEVEDQIEAAR.Q      |                                                                                                                                                                                                                   |
| <a href="#">4510</a> | 648.99 | 1943.94 | 1943.94 | 0.88  | 0 | 25   | 0.017    | 1 | R.CSGPGLPLYTLHSSVNDK.G   |                                                                                                                                                                                                                   |
| <a href="#">4925</a> | 759.38 | 2275.12 | 2275.12 | 1.75  | 1 | (36) | 0.0015   | 1 | R.VLEDNSALDKMLQNVQMPSK.K |                                                                                                                                                                                                                   |
| <a href="#">4932</a> | 764.71 | 2291.12 | 2291.11 | 2.49  | 1 | 49   | 7.5e-005 | 1 | R.VLEDNSALDKMLQNVQMPSK.K |                                                                                                                                                                                                                   |

3. [NEP\\_HUMAN](#) Mass: 86144 Score: 1683 Queries matched: 58 emPAI: 2.12

Neprilysin OS=Homo sapiens GN=MME PE=1 SV=2

| Query                | Observed | Mr (expt) | Mr (calc) | ppm   | Miss | Score | Expect   | Rank | Peptide                |                                                                                                                                                                                     |
|----------------------|----------|-----------|-----------|-------|------|-------|----------|------|------------------------|-------------------------------------------------------------------------------------------------------------------------------------------------------------------------------------|
| <a href="#">6</a>    | 400.75   | 799.49    | 799.49    | 0.16  | 1    | 49    | 9.3e-005 | 1    | K.ALAIKER.I            |                                                                                                                                                                                     |
| <a href="#">72</a>   | 406.78   | 811.55    | 811.55    | -0.63 | 0    | 28    | 0.0014   | 1    | K.LKPILTK.Y            | <a href="#">73</a>                                                                                                                                                                  |
| <a href="#">133</a>  | 414.73   | 827.44    | 827.44    | -1.10 | 0    | 44    | 0.00015  | 1    | K.DVLQEPK.T            | <a href="#">132</a> <a href="#">134</a>                                                                                                                                             |
| <a href="#">222</a>  | 422.75   | 843.48    | 843.48    | 3.81  | 0    | 57    | 2.9e-005 | 1    | K.AIAQLNSK.Y           | <a href="#">219</a> <a href="#">220</a> <a href="#">221</a>                                                                                                                         |
| <a href="#">743</a>  | 477.73   | 953.44    | 953.44    | -4.75 | 0    | 17    | 0.11     | 1    | K.YACGGWLK.R           |                                                                                                                                                                                     |
| <a href="#">880</a>  | 491.72   | 981.42    | 981.42    | -0.83 | 0    | (39)  | 0.00036  | 1    | K.NSYMNPEK.K           | <a href="#">877</a> <a href="#">878</a> <a href="#">879</a> <a href="#">881</a> <a href="#">882</a>                                                                                 |
| <a href="#">965</a>  | 499.72   | 997.42    | 997.42    | 1.34  | 0    | 46    | 6.6e-005 | 1    | K.NSYMNPEK.K           | <a href="#">964</a> <a href="#">966</a>                                                                                                                                             |
| <a href="#">989</a>  | 501.76   | 1001.51   | 1001.51   | -2.34 | 0    | 38    | 0.0018   | 1    | R.NVIPETSSR.Y          | <a href="#">985</a> <a href="#">986</a> <a href="#">987</a> <a href="#">988</a> <a href="#">990</a> <a href="#">993</a> <a href="#">994</a> <a href="#">995</a> <a href="#">996</a> |
| <a href="#">1000</a> | 501.78   | 1001.54   | 1001.54   | 2.21  | 0    | 59    | 1.6e-005 | 1    | K.TEDIVAVQK.A          | <a href="#">999</a>                                                                                                                                                                 |
| <a href="#">1054</a> | 506.74   | 1011.47   | 1011.47   | 5.09  | 0    | 70    | 4.8e-007 | 1    | K.YGASWTAEK.A          | <a href="#">1053</a>                                                                                                                                                                |
| <a href="#">1120</a> | 514.28   | 1026.55   | 1026.55   | 2.72  | 1    | 48    | 9.2e-005 | 1    | R.AYQNYIKK.N           |                                                                                                                                                                                     |
| <a href="#">1579</a> | 554.28   | 1106.54   | 1106.54   | 1.49  | 0    | 50    | 8.1e-005 | 1    | R.NDPMLLYNK.M          |                                                                                                                                                                                     |
| <a href="#">1585</a> | 555.77   | 1109.52   | 1109.52   | 4.78  | 1    | 52    | 3.3e-005 | 1    | K.NSYMNPEKK.C          | <a href="#">1584</a>                                                                                                                                                                |
| <a href="#">1684</a> | 565.27   | 1128.53   | 1128.53   | -2.61 | 0    | 38    | 0.00071  | 1    | K.TDVHSPGNFR.I         | <a href="#">1685</a>                                                                                                                                                                |
| <a href="#">2538</a> | 642.83   | 1283.64   | 1283.64   | 0.29  | 0    | 84    | 2.6e-008 | 1    | R.LYVEAAFAGESK.H       |                                                                                                                                                                                     |
| <a href="#">2678</a> | 656.28   | 1310.55   | 1310.55   | 2.17  | 0    | 53    | 9.7e-006 | 1    | R.DYECTGIYK.E          |                                                                                                                                                                                     |
| <a href="#">3223</a> | 725.35   | 1448.69   | 1448.68   | 6.14  | 0    | 118   | 1.2e-011 | 1    | R.IGYPDDIVSNDK.L       | <a href="#">3222</a>                                                                                                                                                                |
| <a href="#">3247</a> | 728.86   | 1455.70   | 1455.70   | 1.95  | 0    | 75    | 1.9e-007 | 1    | K.ALYGTTSETATWR.R      |                                                                                                                                                                                     |
| <a href="#">3802</a> | 814.42   | 1626.83   | 1626.83   | 0.26  | 0    | 97    | 1.4e-009 | 1    | R.LPIDENQLALEMKN.V     |                                                                                                                                                                                     |
| <a href="#">3851</a> | 822.42   | 1642.83   | 1642.82   | 2.68  | 0    | (87)  | 1.6e-008 | 1    | R.LPIDENQLALEMKN.V     |                                                                                                                                                                                     |
| <a href="#">3913</a> | 834.86   | 1667.71   | 1667.71   | -4.95 | 0    | 108   | 2.9e-011 | 1    | R.CANYVNGNMENAVGR.L    | <a href="#">3915</a>                                                                                                                                                                |
| <a href="#">3944</a> | 842.86   | 1683.71   | 1683.71   | -1.45 | 0    | (95)  | 5.3e-010 | 1    | R.CANYVNGNMENAVGR.L    | <a href="#">3943</a>                                                                                                                                                                |
| <a href="#">4299</a> | 902.44   | 1802.86   | 1802.87   | -7.56 | 0    | 95    | 2.2e-009 | 1    | K.SESQMDITDINTPKPK.K   | <a href="#">4300</a>                                                                                                                                                                |
| <a href="#">4617</a> | 663.67   | 1987.99   | 1987.99   | 2.33  | 1    | (43)  | 0.00029  | 1    | M.GKSESQMDITDINTPKPK.K |                                                                                                                                                                                     |
| <a href="#">4654</a> | 669.00   | 2003.98   | 2003.98   | -0.12 | 1    | 51    | 4.5e-005 | 1    | M.GKSESQMDITDINTPKPK.K |                                                                                                                                                                                     |
| <a href="#">4748</a> | 1023.96  | 2045.91   | 2045.91   | 2.15  | 0    | 35    | 0.00078  | 1    | R.LIQNMDATTEPCTDFFK.Y  |                                                                                                                                                                                     |
| <a href="#">4856</a> | 724.04   | 2169.09   | 2169.07   | 5.85  | 1    | (7)   | 1.3      | 1    | R.QEERLPIDENQLALEMKN.V |                                                                                                                                                                                     |
| <a href="#">4864</a> | 729.36   | 2185.07   | 2185.07   | -1.37 | 1    | 23    | 0.026    | 1    | R.QEERLPIDENQLALEMKN.V |                                                                                                                                                                                     |

4. [K1C9\\_HUMAN](#) Mass: 62255 Score: 1606 Queries matched: 32 emPAI: 0.89

Keratin, type I cytoskeletal 9 OS=Homo sapiens GN=KRT9 PE=1 SV=3

| Query                | Observed | Mr(expt) | Mr(calc) | ppm   | Miss | Score | Expect   | Rank | Peptide                                                                                                                                                          |
|----------------------|----------|----------|----------|-------|------|-------|----------|------|------------------------------------------------------------------------------------------------------------------------------------------------------------------|
| <a href="#">464</a>  | 449.21   | 896.41   | 896.41   | -0.79 | 0    | 53    | 2.1e-005 | 1    | R.MTLDDFR.I                                                                                                                                                      |
| <a href="#">884</a>  | 491.72   | 981.43   | 981.43   | 0.72  | 0    | 86    | 7.7e-009 | 1    | R.FSSSGGGGGGR.F <a href="#">883</a> <a href="#">885</a>                                                                                                          |
| <a href="#">1334</a> | 530.79   | 1059.56  | 1059.56  | 1.36  | 0    | 26    | 0.028    | 1    | K.TLLDIDNTR.M                                                                                                                                                    |
| <a href="#">1362</a> | 533.25   | 1064.49  | 1064.49  | -2.86 | 0    | (73)  | 2.8e-007 | 1    | K.STMQELNSR.L <a href="#">1361</a> <a href="#">1363</a> <a href="#">1364</a> <a href="#">1365</a> <a href="#">1366</a> <a href="#">1367</a> <a href="#">1368</a> |
| <a href="#">1436</a> | 541.25   | 1080.49  | 1080.49  | -0.38 | 0    | 74    | 1.7e-007 | 1    | K.STMQELNSR.L <a href="#">1437</a> <a href="#">1438</a>                                                                                                          |
| <a href="#">1644</a> | 561.30   | 1120.58  | 1120.58  | 6.74  | 0    | 23    | 0.046    | 1    | R.QEYEQLIAK.N                                                                                                                                                    |
| <a href="#">1880</a> | 579.30   | 1156.59  | 1156.58  | 6.81  | 0    | 61    | 5.9e-006 | 1    | R.QGVADINGLR.Q <a href="#">1878</a> <a href="#">1879</a>                                                                                                         |
| <a href="#">2114</a> | 603.81   | 1205.60  | 1205.60  | 6.57  | 0    | 28    | 0.019    | 1    | R.QVLDNLTMEK.S                                                                                                                                                   |
| <a href="#">2263</a> | 616.80   | 1231.59  | 1231.59  | -2.49 | 0    | 105   | 2.3e-010 | 1    | R.SGGGGGGLGSGGSIR.S <a href="#">2262</a> <a href="#">2264</a> <a href="#">2265</a>                                                                               |
| <a href="#">2280</a> | 618.27   | 1234.52  | 1234.52  | -0.89 | 0    | 82    | 1.1e-008 | 1    | R.FSSSSGYGGSSR.V <a href="#">2278</a> <a href="#">2279</a> <a href="#">2281</a> <a href="#">2282</a>                                                             |
| <a href="#">4275</a> | 896.37   | 1790.72  | 1790.72  | 2.01  | 0    | 139   | 1.4e-014 | 1    | R.GSGGSGYGGGSGGGYGGGSGSR.G <a href="#">4276</a>                                                                                                                  |

5. [K22E\\_HUMAN](#) Mass: 65678 Score: 1404 Queries matched: 27 emPAI: 0.47

Keratin, type II cytoskeletal 2 epidermal OS=Homo sapiens GN=KRT2 PE=1 SV=2

| Query                | Observed | Mr(expt) | Mr(calc) | ppm   | Miss | Score | Expect   | Rank | Peptide                                                                                                                                                          |
|----------------------|----------|----------|----------|-------|------|-------|----------|------|------------------------------------------------------------------------------------------------------------------------------------------------------------------|
| <a href="#">159</a>  | 416.25   | 830.48   | 830.49   | -8.23 | 0    | 20    | 0.092    | 2    | R.SLVGLGGTK.S                                                                                                                                                    |
| <a href="#">1204</a> | 521.28   | 1040.55  | 1040.55  | -0.77 | 0    | 42    | 0.00029  | 1    | K.VDPEIQNVK.A <a href="#">1199</a> <a href="#">1200</a> <a href="#">1201</a> <a href="#">1202</a> <a href="#">1203</a> <a href="#">1205</a> <a href="#">1206</a> |
| <a href="#">1376</a> | 533.76   | 1065.51  | 1065.51  | 1.11  | 1    | 14    | 0.33     | 4    | K.YEDEINKR.T                                                                                                                                                     |
| <a href="#">1576</a> | 554.27   | 1106.53  | 1106.54  | -1.53 | 0    | 51    | 7.1e-005 | 1    | K.AQYEEIAQR.S <a href="#">1575</a> <a href="#">1577</a> <a href="#">1578</a>                                                                                     |
| <a href="#">2076</a> | 599.28   | 1196.54  | 1196.54  | 0.31  | 0    | 98    | 7.3e-010 | 1    | K.GGSISGGYGGGGK.H <a href="#">2075</a>                                                                                                                           |
| <a href="#">2396</a> | 627.81   | 1253.60  | 1253.60  | -0.67 | 0    | 90    | 6.5e-009 | 1    | R.GFSSGSVAVSGSR.R <a href="#">2395</a> <a href="#">2397</a> <a href="#">2399</a> <a href="#">2400</a>                                                            |
| <a href="#">3691</a> | 794.85   | 1587.68  | 1587.68  | 0.60  | 0    | 132   | 1.2e-013 | 1    | R.GSSSSGGYGGGGSSSVK.G <a href="#">3692</a>                                                                                                                       |
| <a href="#">4117</a> | 870.86   | 1739.70  | 1739.70  | 0.36  | 0    | 156   | 2.8e-016 | 1    | R.GSSSSGGYSSGSSSYGSGGR.Q <a href="#">4121</a>                                                                                                                    |
| <a href="#">4139</a> | 871.38   | 1740.74  | 1740.74  | -0.09 | 0    | 161   | 1.3e-016 | 1    | R.GSGGGGSISSGGYGGGSGGR.Y <a href="#">4138</a>                                                                                                                    |

6. [GAPR1\\_HUMAN](#) Mass: 17322 Score: 1292 Queries matched: 26 emPAI: 1.24

Golgi-associated plant pathogenesis-related protein 1 OS=Homo sapiens GN=GLIPR2 PE=1 SV=3

| Query                | Observed | Mr(expt) | Mr(calc) | ppm   | Miss | Score | Expect   | Rank | Peptide                                                                                                                                                                                                                            |
|----------------------|----------|----------|----------|-------|------|-------|----------|------|------------------------------------------------------------------------------------------------------------------------------------------------------------------------------------------------------------------------------------|
| <a href="#">2</a>    | 400.19   | 798.37   | 798.36   | 5.91  | 0    | 25    | 0.013    | 1    | K.HSPESSR.G <a href="#">1</a>                                                                                                                                                                                                      |
| <a href="#">126</a>  | 413.21   | 824.40   | 824.41   | -6.36 | 0    | 11    | 0.34     | 2    | R.WYSEIK.N <a href="#">125</a> <a href="#">127</a> <a href="#">129</a>                                                                                                                                                             |
| <a href="#">2381</a> | 627.31   | 1252.60  | 1252.60  | -1.71 | 0    | 116   | 2.3e-011 | 1    | K.ASASDGSFVVAR.Y <a href="#">2382</a> <a href="#">2384</a> <a href="#">2385</a> <a href="#">2386</a> <a href="#">2387</a> <a href="#">2388</a> <a href="#">2390</a>                                                                |
| <a href="#">3239</a> | 727.35   | 1452.69  | 1452.68  | 4.44  | 0    | 103   | 3.5e-010 | 1    | R.EAQYSEALASTR.I <a href="#">3229</a> <a href="#">3230</a> <a href="#">3231</a> <a href="#">3232</a> <a href="#">3233</a> <a href="#">3234</a> <a href="#">3236</a> <a href="#">3237</a> <a href="#">3238</a> <a href="#">3240</a> |
| <a href="#">4439</a> | 942.92   | 1883.82  | 1883.81  | 2.89  | 0    | 63    | 1.1e-006 | 1    | R.GQCGENLAWASYDQTK.E                                                                                                                                                                                                               |

7. [K2C1\\_HUMAN](#) Mass: 66170 Score: 1243 Queries matched: 34 emPAI: 0.93

Keratin, type II cytoskeletal 1 OS=Homo sapiens GN=KRT1 PE=1 SV=6

| Query                | Observed | Mr(expt) | Mr(calc) | ppm   | Miss | Score | Expect   | Rank | Peptide                                                                                                                |
|----------------------|----------|----------|----------|-------|------|-------|----------|------|------------------------------------------------------------------------------------------------------------------------|
| <a href="#">18</a>   | 401.73   | 801.44   | 801.43   | 2.65  | 1    | 26    | 0.044    | 1    | R.EREQIK.S                                                                                                             |
| <a href="#">353</a>  | 437.75   | 873.49   | 873.49   | 0.63  | 0    | 46    | 0.00031  | 1    | R.SLVNLGGSK.S                                                                                                          |
| <a href="#">973</a>  | 500.23   | 998.44   | 998.44   | 6.73  | 0    | 63    | 1.9e-006 | 1    | K.DVDGAYMTK.V <a href="#">968</a> <a href="#">969</a> <a href="#">970</a> <a href="#">972</a>                          |
| <a href="#">1070</a> | 508.22   | 1014.43  | 1014.43  | 1.76  | 0    | (30)  | 0.0018   | 1    | K.DVDGAYMTK.V <a href="#">1069</a>                                                                                     |
| <a href="#">1152</a> | 517.26   | 1032.51  | 1032.51  | 1.33  | 0    | 54    | 4.2e-005 | 1    | R.TLLEGEESR.M                                                                                                          |
| <a href="#">1369</a> | 533.26   | 1064.51  | 1064.51  | -2.33 | 0    | 60    | 7e-006   | 1    | K.AQYEDIAQK.S <a href="#">1370</a> <a href="#">1371</a> <a href="#">1372</a> <a href="#">1373</a> <a href="#">1374</a> |
| <a href="#">1376</a> | 533.76   | 1065.51  | 1065.51  | 1.11  | 1    | 14    | 0.33     | 4    | K.YEDEINKR.T                                                                                                           |
| <a href="#">1498</a> | 546.75   | 1091.50  | 1091.50  | -0.34 | 0    | 97    | 1.1e-009 | 1    | R.GSGGSSGSGIGGR.G <a href="#">1499</a> <a href="#">1500</a>                                                            |
| <a href="#">1658</a> | 563.28   | 1124.54  | 1124.53  | 0.61  | 0    | 76    | 1.5e-007 | 1    | K.AEAESLYQSK.Y <a href="#">1656</a> <a href="#">1657</a> <a href="#">1659</a>                                          |
| <a href="#">1874</a> | 579.26   | 1156.50  | 1156.51  | -7.04 | 0    | 6     | 0.73     | 1    | R.DYQELMNTK.L                                                                                                          |
| <a href="#">1999</a> | 590.31   | 1178.60  | 1178.59  | 3.62  | 0    | 53    | 4.3e-005 | 1    | K.YEELQITAGR.H                                                                                                         |
| <a href="#">2774</a> | 666.76   | 1331.51  | 1331.51  | -0.83 | 0    | 60    | 1e-006   | 1    | K.NMQDMVEDYR.N <a href="#">2773</a> <a href="#">2775</a> <a href="#">2776</a> <a href="#">2777</a>                     |
| <a href="#">5008</a> | 1192.48  | 2382.95  | 2382.94  | 1.24  | 0    | 82    | 5.8e-009 | 1    | R.GGGGGYGGSSYGGGSGGGGSGGGGGR.G <a href="#">5007</a> <a href="#">5010</a>                                               |

8. [TMPS2\\_HUMAN](#) Mass: 55079 Score: 1170 Queries matched: 23 emPAI: 0.48

Transmembrane protease serine 2 OS=Homo sapiens GN=TMPS2 PE=1 SV=3

| Query                | Observed | Mr(expt) | Mr(calc) | ppm   | Miss | Score | Expect   | Rank | Peptide                                                                                                                                                                                     |
|----------------------|----------|----------|----------|-------|------|-------|----------|------|---------------------------------------------------------------------------------------------------------------------------------------------------------------------------------------------|
| <a href="#">653</a>  | 466.76   | 931.50   | 931.50   | -1.47 | 0    | 72    | 6.7e-007 | 1    | K.TSEVLNAAK.V <a href="#">650</a> <a href="#">651</a> <a href="#">652</a> <a href="#">654</a> <a href="#">655</a> <a href="#">656</a> <a href="#">657</a> <a href="#">658</a>               |
| <a href="#">820</a>  | 486.30   | 970.59   | 970.58   | 6.26  | 0    | 57    | 1.5e-005 | 1    | K.VLLIETQR.C <a href="#">819</a>                                                                                                                                                            |
| <a href="#">1098</a> | 512.24   | 1022.47  | 1022.47  | 0.04  | 0    | 75    | 1.6e-007 | 1    | K.SPSGTVCTSK.T <a href="#">1099</a>                                                                                                                                                         |
| <a href="#">1938</a> | 584.26   | 1166.50  | 1166.50  | -0.06 | 0    | 47    | 5e-005   | 1    | K.LYHSDACSSK.A                                                                                                                                                                              |
| <a href="#">3845</a> | 821.44   | 1640.86  | 1640.86  | 2.28  | 0    | 119   | 7.2e-012 | 1    | R.VLTQASNPVVCTQPK.S <a href="#">3837</a> <a href="#">3839</a> <a href="#">3840</a> <a href="#">3841</a> <a href="#">3842</a> <a href="#">3843</a> <a href="#">3846</a> <a href="#">3847</a> |

9. [BASP1\\_HUMAN](#) Mass: 22680 Score: 1038 Queries matched: 31 emPAI: 3.76

Brain acid soluble protein 1 OS=Homo sapiens GN=BASP1 PE=1 SV=2

| Query                | Observed | Mr(expt) | Mr(calc) | ppm   | Miss | Score | Expect   | Rank | Peptide                                                                                                                                                             |
|----------------------|----------|----------|----------|-------|------|-------|----------|------|---------------------------------------------------------------------------------------------------------------------------------------------------------------------|
| <a href="#">680</a>  | 469.71   | 937.41   | 937.41   | -0.14 | 0    | 52    | 2.1e-005 | 1    | K.GYNNVNDK.A <a href="#">678</a> <a href="#">681</a> <a href="#">683</a> <a href="#">684</a>                                                                        |
| <a href="#">1376</a> | 533.76   | 1065.51  | 1065.51  | 1.09  | 1    | 46    | 0.00023  | 1    | K.KGYNNVNDK.A                                                                                                                                                       |
| <a href="#">2535</a> | 642.82   | 1283.64  | 1283.64  | -0.47 | 0    | 9     | 0.74     | 1    | K.TEAPAAPAAQETK.S                                                                                                                                                   |
| <a href="#">2572</a> | 645.30   | 1288.58  | 1288.58  | 0.16  | 0    | 109   | 4.1e-011 | 1    | K.AEGAATEEEGTPK.E <a href="#">2573</a> <a href="#">2574</a>                                                                                                         |
| <a href="#">3023</a> | 693.84   | 1385.67  | 1385.67  | -0.94 | 0    | 73    | 2.7e-007 | 1    | K.ETPAATEAPSSTPK.A <a href="#">3022</a> <a href="#">3024</a> <a href="#">3025</a>                                                                                   |
| <a href="#">3159</a> | 714.34   | 1426.66  | 1426.66  | 0.78  | 0    | 69    | 5.3e-007 | 1    | K.ESEPQAAEPAAK.E <a href="#">3153</a> <a href="#">3154</a> <a href="#">3155</a> <a href="#">3156</a> <a href="#">3157</a> <a href="#">3158</a> <a href="#">3160</a> |
| <a href="#">4239</a> | 888.43   | 1774.85  | 1774.85  | -1.35 | 0    | 49    | 7.8e-005 | 1    | K.APEQEQAAPGPAAGGEAPK.A                                                                                                                                             |
| <a href="#">4495</a> | 966.94   | 1931.87  | 1931.87  | -0.76 | 0    | 77    | 9.8e-008 | 1    | K.SDGAPASDSKPGSSEAAPSSK.E <a href="#">4494</a> <a href="#">4496</a>                                                                                                 |
| <a href="#">4937</a> | 766.72   | 2297.14  | 2297.13  | 5.58  | 1    | 38    | 0.00083  | 1    | K.AEPPKAPQEQAAPGPAAGGEAPK.A <a href="#">4935</a> <a href="#">4936</a>                                                                                               |
| <a href="#">5164</a> | 879.42   | 2635.23  | 2635.22  | 2.68  | 1    | 25    | 0.01     | 1    | K.AAEAAAAPAESAAPAGEEPSKEGEPK.K <a href="#">5165</a>                                                                                                                 |

10. [ASM3B\\_HUMAN](#) Mass: 51237 Score: 1032 Queries matched: 22 emPAI: 0.23

Acid sphingomyelinase-like phosphodiesterase 3b OS=Homo sapiens GN=SMPDL3B PE=2 SV=2

| Query                | Observed | Mr(expt) | Mr(calc) | ppm   | Miss | Score | Expect   | Rank | Peptide                                                                                                                                                                                                                                                              |
|----------------------|----------|----------|----------|-------|------|-------|----------|------|----------------------------------------------------------------------------------------------------------------------------------------------------------------------------------------------------------------------------------------------------------------------|
| <a href="#">54</a>   | 406.22   | 810.43   | 810.43   | -6.26 | 0    | 71    | 5e-007   | 1    | K.LPGPSGAGR.I <a href="#">55</a> <a href="#">56</a> <a href="#">57</a> <a href="#">58</a> <a href="#">59</a> <a href="#">60</a> <a href="#">61</a> <a href="#">62</a> <a href="#">63</a> <a href="#">64</a> <a href="#">65</a> <a href="#">66</a> <a href="#">67</a> |
| <a href="#">1472</a> | 544.79   | 1087.56  | 1087.56  | -5.00 | 0    | 101   | 7.9e-010 | 1    | R.IAGDQSTLQR.Y <a href="#">1473</a> <a href="#">1474</a> <a href="#">1475</a> <a href="#">1476</a> <a href="#">1477</a>                                                                                                                                              |
| <a href="#">3712</a> | 797.44   | 1592.86  | 1592.86  | -1.73 | 0    | 96    | 1.1e-009 | 1    | K.TTLPGVVGNANPAIR.V <a href="#">3713</a>                                                                                                                                                                                                                             |

11. [IFM1\\_HUMAN](#) Mass: 14126 Score: 1008 Queries matched: 11 emPAI: 0.63

Interferon-induced transmembrane protein 1 OS=Homo sapiens GN=IFITM1 PE=1 SV=3

| Query                | Observed | Mr(expt) | Mr(calc) | ppm   | Miss | Score | Expect   | Rank | Peptide                                                                                                                                            |
|----------------------|----------|----------|----------|-------|------|-------|----------|------|----------------------------------------------------------------------------------------------------------------------------------------------------|
| <a href="#">3632</a> | 785.38   | 1568.75  | 1568.75  | 0.24  | 0    | (151) | 5.3e-015 | 1    | K.MVGDVTGAQAYASTAK.C <a href="#">3629</a> <a href="#">3631</a> <a href="#">3633</a> <a href="#">3634</a> <a href="#">3635</a> <a href="#">3636</a> |
| <a href="#">3675</a> | 793.38   | 1584.74  | 1584.75  | -1.03 | 0    | 154   | 1.8e-015 | 1    | K.MVGDVTGAQAYASTAK.C <a href="#">3671</a> <a href="#">3676</a> <a href="#">3677</a>                                                                |

## Proteins matching the same set of peptides:

[IFM2\\_HUMAN](#) Mass: 14794 Score: 1008 Queries matched: 11

Interferon-induced transmembrane protein 2 OS=Homo sapiens GN=IFITM2 PE=1 SV=2

[IFM3\\_HUMAN](#) Mass: 14794 Score: 1008 Queries matched: 11

Interferon-induced transmembrane protein 3 OS=Homo sapiens GN=IFITM3 PE=1 SV=2

12. [RAB3B\\_HUMAN](#) Mass: 24970 Score: 960 Queries matched: 16 emPAI: 1.34

Ras-related protein Rab-3B OS=Homo sapiens GN=RAB3B PE=1 SV=2

| Query                | Observed | Mr(expt) | Mr(calc) | ppm   | Miss | Score | Expect   | Rank | Peptide                                                                                                                                                                                     |
|----------------------|----------|----------|----------|-------|------|-------|----------|------|---------------------------------------------------------------------------------------------------------------------------------------------------------------------------------------------|
| <a href="#">816</a>  | 484.68   | 967.34   | 967.34   | -0.70 | 0    | (46)  | 2.4e-005 | 1    | K.CDMEER.V <a href="#">817</a>                                                                                                                                                              |
| <a href="#">897</a>  | 492.67   | 983.33   | 983.33   | 0.44  | 0    | 61    | 7.6e-007 | 1    | K.CDMEER.V                                                                                                                                                                                  |
| <a href="#">1538</a> | 550.84   | 1099.66  | 1099.66  | 3.69  | 0    | 68    | 5.1e-007 | 1    | K.LLIIGNSSVGK.T <a href="#">1537</a>                                                                                                                                                        |
| <a href="#">2701</a> | 658.83   | 1315.65  | 1315.65  | 1.50  | 0    | 74    | 3.2e-007 | 1    | K.LQIWDTAGQER.Y                                                                                                                                                                             |
| <a href="#">3919</a> | 835.87   | 1669.72  | 1669.72  | 2.12  | 0    | (99)  | 2.6e-010 | 1    | K.MSDSLDTPSMLGSSK.N                                                                                                                                                                         |
| <a href="#">3959</a> | 843.86   | 1685.72  | 1685.71  | 1.64  | 0    | 126   | 4.5e-013 | 1    | K.MSDSLDTPSMLGSSK.N <a href="#">3954</a> <a href="#">3955</a> <a href="#">3956</a> <a href="#">3957</a> <a href="#">3958</a> <a href="#">3960</a> <a href="#">3961</a> <a href="#">3962</a> |

13. [ADAM9\\_HUMAN](#) Mass: 93006 Score: 944 Queries matched: 18 emPAI: 0.17

Disintegrin and metalloproteinase domain-containing protein 9 OS=Homo sapiens GN=ADAM9 PE=1 SV=1

| Query                | Observed | Mr(expt) | Mr(calc) | ppm   | Miss | Score | Expect   | Rank | Peptide                                                                                                                                                               |
|----------------------|----------|----------|----------|-------|------|-------|----------|------|-----------------------------------------------------------------------------------------------------------------------------------------------------------------------|
| <a href="#">1275</a> | 526.23   | 1050.45  | 1050.46  | -7.84 | 0    | 69    | 3.4e-007 | 1    | K.CATGNALCGK.L <a href="#">1277</a> <a href="#">1278</a> <a href="#">1279</a> <a href="#">1280</a> <a href="#">1281</a>                                               |
| <a href="#">2227</a> | 613.77   | 1225.52  | 1225.52  | 0.68  | 0    | (41)  | 0.00016  | 1    | K.SCIMNSGASGSR.N <a href="#">2226</a>                                                                                                                                 |
| <a href="#">2319</a> | 621.76   | 1241.51  | 1241.51  | 1.02  | 0    | 62    | 8.4e-007 | 1    | K.SCIMNSGASGSR.N <a href="#">2318</a>                                                                                                                                 |
| <a href="#">3569</a> | 775.82   | 1549.63  | 1549.64  | -5.66 | 0    | 98    | 1.4e-010 | 1    | K.LVDAGEECDGCTPK.E <a href="#">3568</a> <a href="#">3570</a> <a href="#">3571</a> <a href="#">3572</a> <a href="#">3573</a> <a href="#">3574</a> <a href="#">3575</a> |

14. [TRFL\\_HUMAN](#) Mass: 80014 Score: 927 Queries matched: 30 emPAI: 1.16

Lactotransferrin OS=Homo sapiens GN=LTF PE=1 SV=6

| Query                | Observed | Mr(expt) | Mr(calc) | ppm   | Miss | Score | Expect   | Rank | Peptide                                              |
|----------------------|----------|----------|----------|-------|------|-------|----------|------|------------------------------------------------------|
| <a href="#">155</a>  | 415.70   | 829.39   | 829.39   | -0.99 | 0    | 35    | 0.0011   | 1    | K.SCHTGLR.R                                          |
| <a href="#">261</a>  | 426.71   | 851.42   | 851.41   | 1.65  | 0    | 57    | 1.4e-005 | 1    | K.DSAIGFSR.V                                         |
| <a href="#">285</a>  | 429.23   | 856.44   | 856.45   | -4.15 | 0    | 21    | 0.055    | 1    | R.GPPVSCIK.R <a href="#">284</a> <a href="#">286</a> |
| <a href="#">435</a>  | 445.71   | 889.41   | 889.41   | 0.14  | 0    | 47    | 0.00014  | 1    | K.SEEEVAAR.R <a href="#">436</a>                     |
| <a href="#">668</a>  | 468.27   | 934.54   | 934.53   | 0.23  | 0    | 59    | 4.6e-006 | 1    | R.VPSSHAVVAR.S                                       |
| <a href="#">726</a>  | 475.22   | 948.43   | 948.43   | 0.49  | 0    | 52    | 4.1e-005 | 1    | R.LCAGTGGENK.C <a href="#">725</a>                   |
| <a href="#">844</a>  | 488.22   | 974.43   | 974.42   | 1.15  | 0    | 38    | 0.00028  | 1    | K.CVPNSNER.Y <a href="#">845</a> <a href="#">846</a> |
| <a href="#">1082</a> | 509.76   | 1017.51  | 1017.51  | -0.28 | 1    | 52    | 6.5e-005 | 1    | R.KSEEEVAAR.R                                        |
| <a href="#">1089</a> | 510.76   | 1019.50  | 1019.50  | 0.32  | 0    | 89    | 1.5e-008 | 1    | R.DGAGDVAFIR.E <a href="#">1090</a>                  |
| <a href="#">1358</a> | 532.82   | 1063.62  | 1063.61  | 1.54  | 0    | 14    | 0.1      | 1    | K.QVLLHQAK.F                                         |
| <a href="#">1830</a> | 575.82   | 1149.62  | 1149.62  | 3.42  | 0    | 40    | 0.00068  | 1    | R.THYAVAVVK.K <a href="#">1829</a>                   |
| <a href="#">2298</a> | 619.31   | 1236.61  | 1236.60  | 6.49  | 0    | 65    | 2.6e-006 | 1    | R.SDTSLTWSVK.G                                       |
| <a href="#">2933</a> | 681.86   | 1361.71  | 1361.70  | 6.96  | 0    | 68    | 1.4e-006 | 1    | K.CGLVPVLAENYK.S <a href="#">2932</a>                |
| <a href="#">3043</a> | 697.35   | 1392.68  | 1392.67  | 5.88  | 0    | 102   | 5.6e-010 | 1    | R.CLAENAGDVAFVK.D                                    |
| <a href="#">3214</a> | 723.36   | 1444.71  | 1444.71  | -3.59 | 0    | 63    | 3.9e-006 | 1    | R.VVWCAVGEQELR.K                                     |
| <a href="#">3649</a> | 790.38   | 1578.74  | 1578.75  | -2.29 | 0    | 82    | 4e-008   | 1    | K.NLLFNDNTECLAR.L                                    |
| <a href="#">3706</a> | 795.89   | 1589.76  | 1589.75  | 8.78  | 0    | 62    | 4.6e-006 | 1    | R.SVQWCAVSQPEATK.C <a href="#">3705</a>              |
| <a href="#">3773</a> | 807.90   | 1613.79  | 1613.78  | 1.47  | 0    | 45    | 0.00021  | 1    | R.DSPIQCTQAIENR.A                                    |
| <a href="#">4311</a> | 904.40   | 1806.78  | 1806.79  | -3.81 | 0    | 0     | 3.2      | 2    | R.SNLCALCIGDEQGENK.C                                 |
| <a href="#">4405</a> | 931.89   | 1861.76  | 1861.76  | 0.68  | 0    | 94    | 4.4e-010 | 1    | K.FDEYFSQSCAPGSDPR.S                                 |

15. [IDHC\\_HUMAN](#) Mass: 46915 Score: 852 Queries matched: 23 emPAI: 0.85

Isocitrate dehydrogenase [NADP] cytoplasmic OS=Homo sapiens GN=IDH1 PE=1 SV=2

| Query                | Observed | Mr(expt) | Mr(calc) | ppm   | Miss | Score | Expect   | Rank | Peptide                                                                                                 |
|----------------------|----------|----------|----------|-------|------|-------|----------|------|---------------------------------------------------------------------------------------------------------|
| <a href="#">182</a>  | 419.21   | 836.40   | 836.40   | -2.06 | 0    | 32    | 0.005    | 1    | K.SQFEAQK.I <a href="#">181</a> <a href="#">183</a>                                                     |
| <a href="#">932</a>  | 496.24   | 990.46   | 990.46   | 0.02  | 0    | 42    | 0.00035  | 1    | R.DATNDQVTK.D <a href="#">931</a>                                                                       |
| <a href="#">1466</a> | 544.29   | 1086.57  | 1086.57  | 0.59  | 0    | 42    | 0.0007   | 1    | R.ATDFVVPVPGPK.V                                                                                        |
| <a href="#">2276</a> | 617.81   | 1233.61  | 1233.61  | -1.68 | 0    | 77    | 1.8e-007 | 1    | R.LIDDMVAQAMK.S                                                                                         |
| <a href="#">3193</a> | 719.86   | 1437.70  | 1437.70  | 1.84  | 0    | 68    | 1.3e-006 | 1    | K.VEITYTPSDGTQK.V <a href="#">3194</a> <a href="#">3195</a>                                             |
| <a href="#">3983</a> | 848.39   | 1694.76  | 1694.76  | 1.43  | 0    | (92)  | 2.4e-009 | 1    | K.ISGGSVVEMQGDENR.I                                                                                     |
| <a href="#">4037</a> | 856.38   | 1710.75  | 1710.76  | -3.68 | 0    | (103) | 1.5e-010 | 1    | K.ISGGSVVEMQGDENR.I <a href="#">4036</a> <a href="#">4038</a> <a href="#">4041</a> <a href="#">4044</a> |
| <a href="#">4042</a> | 856.39   | 1710.76  | 1710.76  | 3.53  | 0    | 120   | 4.1e-012 | 1    | K.ISGGSVVEMQGDENR.I <a href="#">4039</a> <a href="#">4040</a> <a href="#">4043</a> <a href="#">4045</a> |
| <a href="#">4092</a> | 864.38   | 1726.74  | 1726.75  | -7.56 | 0    | (17)  | 0.04     | 1    | K.ISGGSVVEMQGDENR.I <a href="#">4093</a>                                                                |

16. [CA2D1\\_HUMAN](#) Mass: 125630 Score: 778 Queries matched: 27 emPAI: 0.26

Voltage-dependent calcium channel subunit alpha-2/delta-1 OS=Homo sapiens GN=CACNA2D1 PE=1 SV=3

| Query                | Observed | Mr(expt) | Mr(calc) | ppm   | Miss | Score | Expect   | Rank | Peptide                                                                                                                                                               |
|----------------------|----------|----------|----------|-------|------|-------|----------|------|-----------------------------------------------------------------------------------------------------------------------------------------------------------------------|
| <a href="#">793</a>  | 483.21   | 964.41   | 964.42   | -3.35 | 0    | 17    | 0.046    | 1    | K.MIDGESGK.T <a href="#">788</a> <a href="#">790</a> <a href="#">791</a> <a href="#">792</a> <a href="#">795</a> <a href="#">796</a>                                  |
| <a href="#">799</a>  | 483.69   | 965.37   | 965.37   | 0.02  | 0    | 50    | 9.9e-006 | 1    | K.GTCCPDR.L <a href="#">800</a> <a href="#">801</a>                                                                                                                   |
| <a href="#">1333</a> | 530.78   | 1059.55  | 1059.56  | -1.85 | 0    | 47    | 0.00026  | 1    | K.LEETITQAR.Y                                                                                                                                                         |
| <a href="#">1357</a> | 532.79   | 1063.57  | 1063.57  | 0.82  | 0    | 64    | 3.7e-006 | 1    | R.FVVDGGITR.V                                                                                                                                                         |
| <a href="#">3009</a> | 691.83   | 1381.65  | 1381.65  | -4.68 | 0    | 58    | 7.9e-006 | 1    | K.SGPGAYESGIMVSK.A                                                                                                                                                    |
| <a href="#">3673</a> | 793.38   | 1584.74  | 1584.73  | 3.46  | 0    | 105   | 1.2e-010 | 1    | K.TPNNPSCNADLINR.V <a href="#">3667</a> <a href="#">3668</a> <a href="#">3669</a> <a href="#">3670</a> <a href="#">3671</a> <a href="#">3672</a> <a href="#">3674</a> |
| <a href="#">3924</a> | 836.37   | 1670.72  | 1670.72  | -1.41 | 0    | 75    | 4.9e-008 | 1    | K.SYDYQSVCEPGAAPK.Q <a href="#">3920</a> <a href="#">3921</a> <a href="#">3923</a> <a href="#">3925</a>                                                               |
| <a href="#">4782</a> | 1058.51  | 2115.00  | 2115.00  | 0.24  | 0    | 33    | 0.0021   | 1    | R.LLIQAEQTSQGNPCDMVK.Q                                                                                                                                                |

|                                                                                  |                             |              |            |                     |             |       |          |      |                                                                                                                                                                                                 |
|----------------------------------------------------------------------------------|-----------------------------|--------------|------------|---------------------|-------------|-------|----------|------|-------------------------------------------------------------------------------------------------------------------------------------------------------------------------------------------------|
| 17.                                                                              | <a href="#">CD177_HUMAN</a> | Mass: 47929  | Score: 743 | Queries matched: 22 | emPAI: 1.28 |       |          |      |                                                                                                                                                                                                 |
| CD177 antigen OS=Homo sapiens GN=CD177 PE=1 SV=2                                 |                             |              |            |                     |             |       |          |      |                                                                                                                                                                                                 |
| Query                                                                            | Observed                    | Mr(expt)     | Mr(calc)   | ppm                 | Miss        | Score | Expect   | Rank | Peptide                                                                                                                                                                                         |
| <a href="#">438</a>                                                              | 446.26                      | 890.50       | 890.50     | 3.72                | 0           | 41    | 0.00053  | 1    | R.QIGIFSAR.E                                                                                                                                                                                    |
| <a href="#">594</a>                                                              | 460.75                      | 919.49       | 919.49     | 1.42                | 0           | 67    | 1.8e-006 | 1    | R.GGGIFSNLR.V                                                                                                                                                                                   |
| <a href="#">722</a>                                                              | 474.72                      | 947.43       | 947.43     | 1.32                | 0           | 29    | 0.0055   | 1    | K.DFLTCHR.G                                                                                                                                                                                     |
| <a href="#">2039</a>                                                             | 595.34                      | 1188.67      | 1188.67    | -2.18               | 1           | 19    | 0.045    | 1    | R.LRGGGIFSNLR.V                                                                                                                                                                                 |
| <a href="#">2289</a>                                                             | 618.79                      | 1235.56      | 1235.56    | 0.72                | 0           | 68    | 5.9e-007 | 1    | K.GCSTVGAQNSQK.T <a href="#">2288</a> <a href="#">2290</a> <a href="#">2291</a>                                                                                                                 |
| <a href="#">2577</a>                                                             | 645.79                      | 1289.56      | 1289.57    | -3.61               | 1           | 43    | 8.7e-005 | 1    | K.GCTEAKDQEP.R.V <a href="#">2578</a> <a href="#">2579</a>                                                                                                                                      |
| <a href="#">2592</a>                                                             | 646.81                      | 1291.60      | 1291.60    | -0.61               | 0           | 55    | 1.9e-005 | 1    | K.GTTHCYDGLLR.L                                                                                                                                                                                 |
| <a href="#">4624</a>                                                             | 996.44                      | 1990.86      | 1990.87    | -1.54               | 0           | 103   | 8.5e-011 | 1    | R.QCPTCVQLPGLTCSSGSPR.M <a href="#">4622</a> <a href="#">4623</a> <a href="#">4625</a> <a href="#">4626</a> <a href="#">4627</a> <a href="#">4628</a> <a href="#">4629</a> <a href="#">4630</a> |
| <a href="#">5074</a>                                                             | 1235.52                     | 2469.03      | 2469.04    | -0.76               | 0           | 89    | 1.7e-009 | 1    | R.CPVCLSMEGCLEGTTEEICPK.G                                                                                                                                                                       |
| 18.                                                                              | <a href="#">1433Z_HUMAN</a> | Mass: 27899  | Score: 743 | Queries matched: 20 | emPAI: 1.15 |       |          |      |                                                                                                                                                                                                 |
| 14-3-3 protein zeta/delta OS=Homo sapiens GN=YWHAZ PE=1 SV=1                     |                             |              |            |                     |             |       |          |      |                                                                                                                                                                                                 |
| Query                                                                            | Observed                    | Mr(expt)     | Mr(calc)   | ppm                 | Miss        | Score | Expect   | Rank | Peptide                                                                                                                                                                                         |
| <a href="#">86</a>                                                               | 408.71                      | 815.41       | 815.41     | 0.04                | 0           | 56    | 1.8e-005 | 1    | K.LAEQAER.Y <a href="#">83</a> <a href="#">84</a> <a href="#">85</a>                                                                                                                            |
| <a href="#">428</a>                                                              | 445.25                      | 888.49       | 888.49     | -0.65               | 0           | 46    | 0.00026  | 1    | R.VVSSIEQK.T <a href="#">425</a> <a href="#">426</a> <a href="#">427</a> <a href="#">430</a>                                                                                                    |
| <a href="#">538</a>                                                              | 454.27                      | 906.53       | 906.52     | 8.47                | 0           | 37    | 0.0012   | 1    | R.NLLSVAYK.N                                                                                                                                                                                    |
| <a href="#">1735</a>                                                             | 568.71                      | 1135.40      | 1135.40    | 1.72                | 0           | 54    | 3.9e-006 | 1    | R.YDDMAACMK.S <a href="#">1733</a> <a href="#">1734</a>                                                                                                                                         |
| <a href="#">2508</a>                                                             | 640.33                      | 1278.65      | 1278.65    | 7.01                | 1           | 74    | 2.9e-007 | 1    | R.YLAEVAAGDDKK.G                                                                                                                                                                                |
| <a href="#">2656</a>                                                             | 652.85                      | 1303.68      | 1303.68    | 1.90                | 0           | 19    | 0.12     | 2    | K.FLIPNASQAESK.V                                                                                                                                                                                |
| <a href="#">3567</a>                                                             | 774.87                      | 1547.72      | 1547.71    | 9.12                | 0           | 105   | 1.6e-010 | 1    | K.SVTEQGAELSNEER.N <a href="#">3563</a> <a href="#">3564</a> <a href="#">3565</a> <a href="#">3566</a>                                                                                          |
| 19.                                                                              | <a href="#">S15A2_HUMAN</a> | Mass: 82415  | Score: 688 | Queries matched: 24 | emPAI: 0.30 |       |          |      |                                                                                                                                                                                                 |
| Solute carrier family 15 member 2 OS=Homo sapiens GN=SLC15A2 PE=2 SV=2           |                             |              |            |                     |             |       |          |      |                                                                                                                                                                                                 |
| Query                                                                            | Observed                    | Mr(expt)     | Mr(calc)   | ppm                 | Miss        | Score | Expect   | Rank | Peptide                                                                                                                                                                                         |
| <a href="#">470</a>                                                              | 450.24                      | 898.48       | 898.48     | -1.07               | 0           | 40    | 0.00047  | 1    | K.IEDIPANK.M <a href="#">467</a> <a href="#">468</a> <a href="#">469</a> <a href="#">471</a>                                                                                                    |
| <a href="#">868</a>                                                              | 490.74                      | 979.47       | 979.48     | -2.07               | 0           | 77    | 1.5e-007 | 1    | R.TTNGMTTVR.F <a href="#">865</a> <a href="#">866</a> <a href="#">867</a> <a href="#">869</a>                                                                                                   |
| <a href="#">952</a>                                                              | 498.74                      | 995.47       | 995.47     | 0.31                | 0           | (61)  | 4.3e-006 | 1    | R.TTNGMTTVR.F <a href="#">951</a>                                                                                                                                                               |
| <a href="#">2622</a>                                                             | 649.30                      | 1296.58      | 1296.57    | 5.16                | 0           | 62    | 2.4e-006 | 1    | R.EDGNSISSMMVK.D <a href="#">2621</a>                                                                                                                                                           |
| <a href="#">2684</a>                                                             | 657.29                      | 1312.56      | 1312.56    | -5.26               | 0           | (51)  | 1.3e-005 | 1    | R.EDGNSISSMMVK.D <a href="#">2682</a> <a href="#">2683</a> <a href="#">2685</a> <a href="#">2686</a> <a href="#">2687</a> <a href="#">2688</a> <a href="#">2689</a>                             |
| <a href="#">2766</a>                                                             | 665.29                      | 1328.56      | 1328.56    | -2.02               | 0           | (53)  | 9.3e-006 | 1    | R.EDGNSISSMMVK.D <a href="#">2767</a>                                                                                                                                                           |
| 20.                                                                              | <a href="#">PDC6I_HUMAN</a> | Mass: 96590  | Score: 672 | Queries matched: 25 | emPAI: 0.40 |       |          |      |                                                                                                                                                                                                 |
| Programmed cell death 6-interacting protein OS=Homo sapiens GN=PDC6IP PE=1 SV=1  |                             |              |            |                     |             |       |          |      |                                                                                                                                                                                                 |
| Query                                                                            | Observed                    | Mr(expt)     | Mr(calc)   | ppm                 | Miss        | Score | Expect   | Rank | Peptide                                                                                                                                                                                         |
| <a href="#">82</a>                                                               | 408.25                      | 814.49       | 814.49     | -1.25               | 1           | 44    | 0.00027  | 1    | K.KQEGLLK.N                                                                                                                                                                                     |
| <a href="#">431</a>                                                              | 445.26                      | 888.51       | 888.51     | 4.73                | 1           | 22    | 0.049    | 1    | K.MKDAlIAK.L                                                                                                                                                                                    |
| <a href="#">579</a>                                                              | 458.25                      | 914.48       | 914.48     | -0.46               | 0           | 53    | 3.6e-005 | 1    | K.AVQADGQVK.E <a href="#">580</a>                                                                                                                                                               |
| <a href="#">836</a>                                                              | 487.29                      | 972.57       | 972.56     | 7.61                | 0           | 36    | 0.001    | 1    | K.EVFPVLAAK.H <a href="#">835</a>                                                                                                                                                               |
| <a href="#">1959</a>                                                             | 585.33                      | 1168.65      | 1168.65    | 3.59                | 0           | 52    | 2.8e-005 | 1    | K.STPVNVPISQK.F <a href="#">1953</a> <a href="#">1954</a> <a href="#">1955</a> <a href="#">1956</a> <a href="#">1958</a>                                                                        |
| <a href="#">2657</a>                                                             | 652.85                      | 1303.69      | 1303.68    | 8.00                | 0           | 70    | 7e-007   | 1    | K.TMQGSEVVNVLK.S <a href="#">2655</a> <a href="#">2656</a>                                                                                                                                      |
| <a href="#">3490</a>                                                             | 766.86                      | 1531.71      | 1531.70    | 3.83                | 0           | 85    | 2e-008   | 1    | R.LLDEEATDNDLR.A                                                                                                                                                                                |
| <a href="#">4831</a>                                                             | 1081.48                     | 2160.95      | 2160.95    | -1.35               | 0           | 105   | 7.5e-011 | 1    | K.FIQQTYPGEGEEQAQYCR.A <a href="#">4829</a> <a href="#">4830</a> <a href="#">4833</a> <a href="#">4834</a> <a href="#">4835</a> <a href="#">4836</a> <a href="#">4837</a> <a href="#">4838</a>  |
| 21.                                                                              | <a href="#">AT8A1_HUMAN</a> | Mass: 132597 | Score: 661 | Queries matched: 17 | emPAI: 0.21 |       |          |      |                                                                                                                                                                                                 |
| Probable phospholipid-transporting ATPase IA OS=Homo sapiens GN=ATP8A1 PE=1 SV=1 |                             |              |            |                     |             |       |          |      |                                                                                                                                                                                                 |
| Query                                                                            | Observed                    | Mr(expt)     | Mr(calc)   | ppm                 | Miss        | Score | Expect   | Rank | Peptide                                                                                                                                                                                         |
| <a href="#">69</a>                                                               | 406.71                      | 811.41       | 811.41     | 2.06                | 0           | 30    | 0.0045   | 1    | K.YPELYK.T                                                                                                                                                                                      |
| <a href="#">1006</a>                                                             | 502.73                      | 1003.44      | 1003.44    | 0.58                | 0           | 58    | 3.6e-006 | 1    | R.IECESPNR.H <a href="#">1005</a>                                                                                                                                                               |

|                      |        |         |         |       |   |    |          |   |                                                                                                                                                                   |
|----------------------|--------|---------|---------|-------|---|----|----------|---|-------------------------------------------------------------------------------------------------------------------------------------------------------------------|
| <a href="#">1392</a> | 535.80 | 1069.58 | 1069.58 | 5.91  | 0 | 36 | 0.0014   | 1 | K.SQDPGAVVLGK.S <a href="#">1390</a>                                                                                                                              |
| <a href="#">1813</a> | 574.28 | 1146.55 | 1146.55 | 1.23  | 0 | 88 | 1.4e-008 | 1 | K.TSLADQEEVR.T <a href="#">1809</a> <a href="#">1810</a> <a href="#">1812</a> <a href="#">1814</a> <a href="#">1815</a> <a href="#">1816</a> <a href="#">1817</a> |
| <a href="#">2646</a> | 651.88 | 1301.74 | 1301.73 | 2.36  | 0 | 69 | 4.7e-007 | 1 | R.TIFINQPQLTK.F                                                                                                                                                   |
| <a href="#">2771</a> | 666.35 | 1330.68 | 1330.67 | 2.65  | 0 | 87 | 1.7e-008 | 1 | R.TSNLNEELGQVK.Y                                                                                                                                                  |
| <a href="#">2970</a> | 687.36 | 1372.71 | 1372.71 | -0.77 | 0 | 85 | 2.9e-008 | 1 | K.TLVDEVQELEAK.S <a href="#">2971</a>                                                                                                                             |

22. [STEAP4\\_HUMAN](#) Mass: 52518 Score: 659 Queries matched: 17 emPAI: 0.73

Metalloreductase STEAP4 OS=Homo sapiens GN=STEAP4 PE=1 SV=1

| Query                | Observed | Mr(expt) | Mr(calc) | ppm   | Miss | Score | Expect   | Rank | Peptide                                                                                                                  |
|----------------------|----------|----------|----------|-------|------|-------|----------|------|--------------------------------------------------------------------------------------------------------------------------|
| <a href="#">659</a>  | 467.26   | 932.51   | 932.51   | 1.72  | 0    | 23    | 0.042    | 1    | R.FLSPSNLR.W <a href="#">660</a>                                                                                         |
| <a href="#">714</a>  | 472.75   | 943.49   | 943.50   | -5.33 | 1    | 7     | 1.7      | 2    | R.IRQWER.N                                                                                                               |
| <a href="#">1679</a> | 564.84   | 1127.66  | 1127.65  | 2.06  | 0    | 52    | 3.1e-005 | 1    | K.ILVDISNNLK.I                                                                                                           |
| <a href="#">1848</a> | 577.27   | 1152.52  | 1152.52  | -3.89 | 0    | 55    | 1.3e-005 | 1    | R.QVFCVCGNDSK.A <a href="#">1849</a> <a href="#">1850</a> <a href="#">1851</a> <a href="#">1853</a> <a href="#">1854</a> |
| <a href="#">3861</a> | 823.92   | 1645.82  | 1645.82  | 2.08  | 0    | 90    | 8.5e-009 | 1    | R.NLGLTPMDQGSLSMAAK.E                                                                                                    |
| <a href="#">3902</a> | 831.92   | 1661.82  | 1661.81  | 6.15  | 0    | (72)  | 5.1e-007 | 1    | R.NLGLTPMDQGSLSMAAK.E                                                                                                    |
| <a href="#">3936</a> | 839.91   | 1677.81  | 1677.81  | 3.00  | 0    | (88)  | 1.1e-008 | 1    | R.NLGLTPMDQGSLSMAAK.E <a href="#">3937</a>                                                                               |
| <a href="#">3938</a> | 840.40   | 1678.79  | 1678.79  | 0.68  | 0    | 83    | 2.3e-008 | 1    | K.TCIDALPLTMNSSEK.Q                                                                                                      |
| <a href="#">4375</a> | 918.99   | 1835.97  | 1835.95  | 8.78  | 0    | 101   | 4e-010   | 1    | K.TTLLPSGAEVLSYSEAAK.K <a href="#">4374</a>                                                                              |

23. [SEMGL\\_HUMAN](#) Mass: 52157 Score: 651 Queries matched: 15 emPAI: 0.51

Semenogelin-1 OS=Homo sapiens GN=SEMGL PE=1 SV=2

| Query                | Observed | Mr(expt) | Mr(calc) | ppm   | Miss | Score | Expect   | Rank | Peptide                                                                        |
|----------------------|----------|----------|----------|-------|------|-------|----------|------|--------------------------------------------------------------------------------|
| <a href="#">890</a>  | 491.77   | 981.52   | 981.52   | -2.11 | 0    | 65    | 1.8e-006 | 1    | K.SQIQAPNPK.Q <a href="#">889</a> <a href="#">891</a>                          |
| <a href="#">1165</a> | 517.76   | 1033.50  | 1033.50  | -0.11 | 0    | 56    | 2.2e-005 | 1    | K.EQTSVSGAOK.G <a href="#">1166</a> <a href="#">1167</a>                       |
| <a href="#">2546</a> | 643.80   | 1285.58  | 1285.58  | -1.34 | 0    | 74    | 1.5e-007 | 1    | K.ISYQSSSTEER.R <a href="#">2544</a> <a href="#">2545</a> <a href="#">2547</a> |
| <a href="#">2960</a> | 685.81   | 1369.61  | 1369.61  | -3.67 | 0    | 82    | 2e-008   | 1    | K.GISSQYSNTEER.L <a href="#">2959</a>                                          |
| <a href="#">3722</a> | 801.36   | 1600.71  | 1600.71  | 0.60  | 0    | 92    | 1.6e-009 | 1    | R.GTQNPSQDQGNPSGK.G <a href="#">3720</a> <a href="#">3721</a>                  |

24. [ALBU\\_HUMAN](#) Mass: 71317 Score: 606 Queries matched: 16 emPAI: 0.36

Serum albumin OS=Homo sapiens GN=ALB PE=1 SV=2

| Query                | Observed | Mr(expt) | Mr(calc) | ppm   | Miss | Score | Expect   | Rank | Peptide                                                                                              |
|----------------------|----------|----------|----------|-------|------|-------|----------|------|------------------------------------------------------------------------------------------------------|
| <a href="#">898</a>  | 492.74   | 983.47   | 983.48   | -6.34 | 0    | 17    | 0.12     | 1    | K.TYETLLEK.C                                                                                         |
| <a href="#">1064</a> | 507.30   | 1012.59  | 1012.59  | 2.51  | 0    | 37    | 0.0011   | 1    | K.LVAASQAALGL.- <a href="#">1062</a> <a href="#">1063</a>                                            |
| <a href="#">2962</a> | 686.29   | 1370.56  | 1370.56  | 0.49  | 0    | 55    | 2.9e-006 | 1    | K.AAFTECCQAADK.A <a href="#">2961</a>                                                                |
| <a href="#">3178</a> | 717.77   | 1433.52  | 1433.53  | -3.08 | 0    | 49    | 1.1e-005 | 1    | R.ETYGEMADCCAK.Q <a href="#">3179</a> <a href="#">3180</a>                                           |
| <a href="#">3206</a> | 722.32   | 1442.63  | 1442.63  | -0.67 | 0    | 73    | 1.4e-007 | 1    | K.YICENQDSISSK.L <a href="#">3203</a> <a href="#">3204</a> <a href="#">3205</a> <a href="#">3207</a> |
| <a href="#">3392</a> | 749.79   | 1497.57  | 1497.57  | 1.12  | 0    | 111   | 7.9e-012 | 1    | K.TCVADESAENCDK.S <a href="#">3391</a>                                                               |

25. [SNP23\\_HUMAN](#) Mass: 23682 Score: 598 Queries matched: 12 emPAI: 0.16

Synaptosomal-associated protein 23 OS=Homo sapiens GN=SNP23 PE=1 SV=1

| Query                | Observed | Mr(expt) | Mr(calc) | ppm   | Miss | Score | Expect   | Rank | Peptide                                                                                                                                                                                                                                 |
|----------------------|----------|----------|----------|-------|------|-------|----------|------|-----------------------------------------------------------------------------------------------------------------------------------------------------------------------------------------------------------------------------------------|
| <a href="#">1152</a> | 517.26   | 1032.51  | 1032.52  | -9.56 | 1    | 1     | 8.4      | 4    | R.ITDRADTNR.D                                                                                                                                                                                                                           |
| <a href="#">4309</a> | 904.40   | 1806.78  | 1806.78  | -2.38 | 0    | 95    | 1.2e-009 | 1    | K.TTWGDGGGNSPCNVVSK.Q <a href="#">4307</a> <a href="#">4308</a> <a href="#">4310</a> <a href="#">4311</a> <a href="#">4312</a> <a href="#">4313</a> <a href="#">4314</a> <a href="#">4315</a> <a href="#">4316</a> <a href="#">4317</a> |

26. [1433T\\_HUMAN](#) Mass: 28032 Score: 558 Queries matched: 12 emPAI: 0.66

14-3-3 protein theta OS=Homo sapiens GN=YWHAQ PE=1 SV=1

| Query                | Observed | Mr(expt) | Mr(calc) | ppm   | Miss | Score | Expect   | Rank | Peptide                                                                                                |
|----------------------|----------|----------|----------|-------|------|-------|----------|------|--------------------------------------------------------------------------------------------------------|
| <a href="#">86</a>   | 408.71   | 815.41   | 815.41   | 0.04  | 0    | 56    | 1.8e-005 | 1    | K.LAEQAER.Y <a href="#">83</a> <a href="#">84</a> <a href="#">85</a>                                   |
| <a href="#">498</a>  | 452.26   | 902.51   | 902.51   | 0.50  | 0    | 49    | 0.00011  | 1    | R.VISSIEQK.T <a href="#">499</a>                                                                       |
| <a href="#">538</a>  | 454.27   | 906.53   | 906.52   | 8.47  | 0    | 37    | 0.0012   | 1    | R.NLLSVAYK.N                                                                                           |
| <a href="#">3491</a> | 766.86   | 1531.71  | 1531.71  | -2.87 | 0    | 109   | 6.5e-011 | 1    | K.AVTEQGAELSNEER.N <a href="#">3489</a> <a href="#">3492</a> <a href="#">3494</a> <a href="#">3495</a> |

27. [PGK1\\_HUMAN](#) Mass: 44985 Score: 543 Queries matched: 16 emPAI: 0.38

Phosphoglycerate kinase 1 OS=Homo sapiens GN=PGK1 PE=1 SV=3

| Query                | Observed | Mr(expt) | Mr(calc) | ppm   | Miss | Score | Expect   | Rank | Peptide                                                                                                    |
|----------------------|----------|----------|----------|-------|------|-------|----------|------|------------------------------------------------------------------------------------------------------------|
| <a href="#">38</a>   | 405.21   | 808.40   | 808.41   | -3.88 | 0    | 58    | 1.2e-005 | 1    | K.YAEAVTR.A <a href="#">39</a> <a href="#">40</a> <a href="#">41</a> <a href="#">42</a> <a href="#">43</a> |
| <a href="#">390</a>  | 442.73   | 883.45   | 883.44   | 1.46  | 0    | 18    | 0.086    | 1    | K.ELNYFAK.A                                                                                                |
| <a href="#">1143</a> | 516.74   | 1031.46  | 1031.46  | 3.51  | 0    | 54    | 1.1e-005 | 1    | K.DCVGPEVEK.A <a href="#">1140</a> <a href="#">1141</a> <a href="#">1142</a>                               |
| <a href="#">1523</a> | 549.32   | 1096.62  | 1096.61  | 2.84  | 0    | 12    | 0.23     | 1    | K.VLPGVDALSNI.-                                                                                            |
| <a href="#">1539</a> | 551.27   | 1100.53  | 1100.53  | -0.83 | 0    | 58    | 1e-005   | 1    | K.NNQITNNQR.I <a href="#">1540</a>                                                                         |
| <a href="#">4162</a> | 877.90   | 1753.79  | 1753.78  | 6.68  | 0    | 100   | 3.8e-010 | 1    | R.GCITIIIGGGDTATCCAK.W <a href="#">4161</a>                                                                |

28. [ANXA2\\_HUMAN](#) Mass: 38808 Score: 538 Queries matched: 12 emPAI: 0.20

Annexin A2 OS=Homo sapiens GN=ANXA2 PE=1 SV=2

| Query                | Observed | Mr(expt) | Mr(calc) | ppm   | Miss | Score | Expect   | Rank | Peptide                                                                                                                  |
|----------------------|----------|----------|----------|-------|------|-------|----------|------|--------------------------------------------------------------------------------------------------------------------------|
| <a href="#">2203</a> | 611.80   | 1221.59  | 1221.59  | -1.77 | 0    | 71    | 5e-007   | 1    | K.TPAQYDASELK.A <a href="#">2201</a> <a href="#">2202</a> <a href="#">2204</a> <a href="#">2205</a> <a href="#">2207</a> |
| <a href="#">2329</a> | 622.82   | 1243.62  | 1243.62  | 2.10  | 0    | 74    | 3.3e-007 | 1    | R.TNQELQEINR.V <a href="#">2324</a> <a href="#">2325</a> <a href="#">2326</a> <a href="#">2327</a> <a href="#">2328</a>  |

## Proteins matching the same set of peptides:

[AXA2L\\_HUMAN](#) Mass: 38806 Score: 538 Queries matched: 12

Putative annexin A2-like protein OS=Homo sapiens GN=ANXA2P2 PE=5 SV=2

29. [TGM4\\_HUMAN](#) Mass: 77951 Score: 521 Queries matched: 9 emPAI: 0.38

Protein-glutamine gamma-glutamyltransferase 4 OS=Homo sapiens GN=TGM4 PE=1 SV=2

| Query                | Observed | Mr(expt) | Mr(calc) | ppm   | Miss | Score | Expect   | Rank | Peptide                                   |
|----------------------|----------|----------|----------|-------|------|-------|----------|------|-------------------------------------------|
| <a href="#">1270</a> | 525.31   | 1048.60  | 1048.60  | -0.29 | 0    | 57    | 4e-006   | 1    | K.HTLVVLDPR.T                             |
| <a href="#">2020</a> | 592.85   | 1183.68  | 1183.68  | 2.18  | 0    | 61    | 4.1e-006 | 1    | K.NTLAIPPLTDVK.F                          |
| <a href="#">3140</a> | 711.32   | 1420.62  | 1420.62  | -3.16 | 0    | 87    | 4.7e-009 | 1    | R.SVTGFDSAHDTER.N                         |
| <a href="#">3716</a> | 798.38   | 1594.75  | 1594.75  | 0.65  | 0    | 95    | 1.6e-009 | 1    | R.NLTVDTYVNEGEK.I                         |
| <a href="#">3974</a> | 846.88   | 1691.75  | 1691.75  | -3.30 | 0    | 88    | 5.1e-009 | 1    | K.GYDGWQAVDTPQER.S <a href="#">3975</a>   |
| <a href="#">4151</a> | 875.43   | 1748.84  | 1748.83  | 4.61  | 0    | 69    | 6.6e-007 | 1    | R.SQGVFCCGSPPLTAIR.K <a href="#">4150</a> |
| <a href="#">4500</a> | 967.50   | 1932.99  | 1933.00  | -4.58 | 0    | 102   | 4.5e-010 | 1    | K.TSQIQGVSEVTLTLDK.T                      |

30. [VPP1\\_HUMAN](#) Mass: 97148 Score: 518 Queries matched: 14 emPAI: 0.21

V-type proton ATPase 116 kDa subunit a isoform 1 OS=Homo sapiens GN=ATP6V0A1 PE=1 SV=3

| Query                | Observed | Mr(expt) | Mr(calc) | ppm   | Miss | Score | Expect   | Rank | Peptide                                                                                              |
|----------------------|----------|----------|----------|-------|------|-------|----------|------|------------------------------------------------------------------------------------------------------|
| <a href="#">785</a>  | 482.73   | 963.44   | 963.44   | -0.82 | 0    | 52    | 3.7e-005 | 1    | K.EMASGVNTR.I <a href="#">786</a>                                                                    |
| <a href="#">864</a>  | 490.73   | 979.44   | 979.44   | 1.08  | 0    | (47)  | 7.2e-005 | 1    | K.EMASGVNTR.I                                                                                        |
| <a href="#">3144</a> | 711.84   | 1421.66  | 1421.66  | 1.09  | 0    | 79    | 6e-008   | 1    | R.MQTNQTPPTYNK.T <a href="#">3141</a> <a href="#">3142</a> <a href="#">3143</a> <a href="#">3145</a> |
| <a href="#">3190</a> | 719.84   | 1437.66  | 1437.66  | 0.36  | 0    | (68)  | 6.4e-007 | 1    | R.MQTNQTPPTYNK.T <a href="#">3189</a> <a href="#">3191</a> <a href="#">3192</a>                      |
| <a href="#">3548</a> | 774.36   | 1546.71  | 1546.71  | 0.25  | 0    | 43    | 0.00023  | 1    | R.ASLYPCPETPQER.K <a href="#">3549</a>                                                               |

31. [GPC5C\\_HUMAN](#) Mass: 48732 Score: 517 Queries matched: 10 emPAI: 0.16

G-protein coupled receptor family C group 5 member C OS=Homo sapiens GN=GPC5C PE=1 SV=2

| Query                | Observed | Mr(expt) | Mr(calc) | ppm   | Miss | Score | Expect   | Rank | Peptide                                                                                                 |
|----------------------|----------|----------|----------|-------|------|-------|----------|------|---------------------------------------------------------------------------------------------------------|
| <a href="#">4148</a> | 873.38   | 1744.74  | 1744.74  | 3.67  | 0    | 90    | 1.7e-009 | 1    | K.SSPEQSYQGDMPYTR.G <a href="#">4144</a> <a href="#">4145</a> <a href="#">4146</a> <a href="#">4147</a> |
| <a href="#">4185</a> | 881.37   | 1760.73  | 1760.73  | -1.18 | 0    | (81)  | 7.3e-009 | 1    | K.SSPEQSYQGDMPYTR.G <a href="#">4180</a> <a href="#">4182</a> <a href="#">4183</a> <a href="#">4184</a> |

32. [EDIL3\\_HUMAN](#) Mass: 55098 Score: 514 Queries matched: 22 emPAI: 0.93

EGF-like repeat and discoidin I-like domain-containing protein 3 OS=Homo sapiens GN=EDIL3 PE=1 SV=1

| Query                | Observed | Mr(expt) | Mr(calc) | ppm   | Miss | Score | Expect   | Rank | Peptide                                                                                                                                                    |
|----------------------|----------|----------|----------|-------|------|-------|----------|------|------------------------------------------------------------------------------------------------------------------------------------------------------------|
| <a href="#">315</a>  | 434.21   | 866.41   | 866.41   | -0.36 | 0    | 35    | 0.0036   | 1    | K.IAYSNDGK.T <a href="#">313</a> <a href="#">314</a>                                                                                                       |
| <a href="#">523</a>  | 453.75   | 905.49   | 905.49   | 1.62  | 0    | 37    | 0.0011   | 1    | R.IGSPEYIK.S                                                                                                                                               |
| <a href="#">666</a>  | 468.24   | 934.47   | 934.47   | -1.06 | 0    | 41    | 0.00066  | 1    | R.LYPQVCR.R <a href="#">667</a>                                                                                                                            |
| <a href="#">834</a>  | 487.29   | 972.56   | 972.56   | 0.55  | 0    | 77    | 1.3e-007 | 1    | R.VTGVITQGAK.R <a href="#">828</a> <a href="#">829</a> <a href="#">830</a> <a href="#">831</a> <a href="#">832</a> <a href="#">833</a> <a href="#">835</a> |
| <a href="#">1380</a> | 534.74   | 1067.47  | 1067.47  | 0.53  | 0    | 58    | 6.4e-006 | 1    | K.GTNEDMVFR.G                                                                                                                                              |

|                      |        |         |         |       |   |    |         |   |                                             |
|----------------------|--------|---------|---------|-------|---|----|---------|---|---------------------------------------------|
| <a href="#">1881</a> | 579.32 | 1156.63 | 1156.62 | 1.34  | 0 | 32 | 0.005   | 1 | K.NVIDPPIYAR.H <a href="#">1882</a>         |
| <a href="#">1888</a> | 580.28 | 1158.54 | 1158.54 | 4.40  | 0 | 46 | 0.00014 | 1 | R.GDTFIGVVK.C                               |
| <a href="#">1923</a> | 583.75 | 1165.48 | 1165.48 | -1.93 | 0 | 36 | 0.00033 | 1 | R.SELLGCTEEE. - <a href="#">1922</a>        |
| <a href="#">4560</a> | 981.98 | 1961.95 | 1961.95 | 0.03  | 0 | 41 | 0.00052 | 1 | R.GNIDNNTPYANSFTPPIK.A <a href="#">4561</a> |

33. [FOLH1\\_HUMAN](#) Mass: 84506 Score: 504 Queries matched: 17 emPAI: 0.47

Glutamate carboxypeptidase 2 OS=Homo sapiens GN=FOLH1 PE=1 SV=1

| Query                | Observed | Mr(expt) | Mr(calc) | ppm   | Miss | Score | Expect   | Rank | Peptide                                                    |
|----------------------|----------|----------|----------|-------|------|-------|----------|------|------------------------------------------------------------|
| <a href="#">586</a>  | 459.24   | 916.47   | 916.48   | -2.06 | 0    | 12    | 0.66     | 1    | K.QIQSQWK.E                                                |
| <a href="#">789</a>  | 483.21   | 964.41   | 964.41   | -1.89 | 0    | 37    | 0.00046  | 1    | K.SPDEGFEGK.S <a href="#">794</a> <a href="#">797</a>      |
| <a href="#">1266</a> | 524.82   | 1047.62  | 1047.61  | 8.72  | 0    | 52    | 2.2e-005 | 1    | R.IYNVIGTLR.G <a href="#">1265</a>                         |
| <a href="#">1900</a> | 581.29   | 1160.57  | 1160.57  | -0.06 | 0    | 71    | 6.3e-007 | 1    | K.SSNEATNITPK.H <a href="#">1897</a>                       |
| <a href="#">2040</a> | 596.28   | 1190.54  | 1190.54  | 0.95  | 0    | (26)  | 0.0094   | 1    | K.SPSPEFSGMPR.I                                            |
| <a href="#">2117</a> | 604.27   | 1206.54  | 1206.53  | 1.21  | 0    | 63    | 1.9e-006 | 1    | K.SPSPEFSGMPR.I <a href="#">2116</a>                       |
| <a href="#">2345</a> | 624.28   | 1246.55  | 1246.54  | 5.24  | 0    | 63    | 1.5e-006 | 1    | K.MGGSAPPDSSWR.G                                           |
| <a href="#">2438</a> | 632.28   | 1262.54  | 1262.53  | 3.79  | 0    | (58)  | 2.9e-006 | 1    | K.MGGSAPPDSSWR.G <a href="#">2436</a> <a href="#">2437</a> |
| <a href="#">3735</a> | 801.89   | 1601.77  | 1601.76  | 4.79  | 0    | 41    | 0.0005   | 1    | K.SYPDGWNLPGGGVQR.G                                        |
| <a href="#">4326</a> | 906.47   | 1810.93  | 1810.91  | 7.28  | 0    | 42    | 0.00036  | 1    | K.GVILYSDPADYFAPGVK.S                                      |

34. [NHRF1\\_HUMAN](#) Mass: 39130 Score: 494 Queries matched: 17 emPAI: 0.32

Na(+)/H(+) exchange regulatory cofactor NHE-RF1 OS=Homo sapiens GN=SLC9A3R1 PE=1 SV=4

| Query                | Observed | Mr(expt) | Mr(calc) | ppm   | Miss | Score | Expect   | Rank | Peptide                                                                                                                                                     |
|----------------------|----------|----------|----------|-------|------|-------|----------|------|-------------------------------------------------------------------------------------------------------------------------------------------------------------|
| <a href="#">1115</a> | 513.78   | 1025.54  | 1025.54  | -2.05 | 0    | 46    | 0.00017  | 1    | R.LVEPGSPAEEK.A <a href="#">1113</a> <a href="#">1114</a>                                                                                                   |
| <a href="#">3076</a> | 700.84   | 1399.66  | 1399.66  | -1.22 | 0    | 76    | 1.4e-007 | 1    | R.SVDPSPAEASGLR.A <a href="#">3075</a> <a href="#">3077</a> <a href="#">3078</a> <a href="#">3079</a> <a href="#">3080</a> <a href="#">3081</a>             |
| <a href="#">5108</a> | 1294.59  | 2587.17  | 2587.19  | -7.00 | 0    | 96    | 5.9e-010 | 1    | R.AQEAPGQAEPPAAAEVQAGNENEPR.E <a href="#">5109</a> <a href="#">5110</a> <a href="#">5111</a> <a href="#">5112</a> <a href="#">5113</a> <a href="#">5114</a> |

35. [GNAI3\\_HUMAN](#) Mass: 41076 Score: 484 Queries matched: 10 emPAI: 0.42

Guanine nucleotide-binding protein G(k) subunit alpha OS=Homo sapiens GN=GNAI3 PE=1 SV=3

| Query                | Observed | Mr(expt) | Mr(calc) | ppm   | Miss | Score | Expect   | Rank | Peptide                                                                                                                 |
|----------------------|----------|----------|----------|-------|------|-------|----------|------|-------------------------------------------------------------------------------------------------------------------------|
| <a href="#">547</a>  | 455.22   | 908.42   | 908.42   | 2.56  | 0    | 53    | 3.1e-005 | 1    | K.MFDVGGQR.S                                                                                                            |
| <a href="#">1316</a> | 529.32   | 1056.62  | 1056.62  | 0.47  | 0    | 73    | 2.5e-007 | 1    | K.LLLLGAESGK.S <a href="#">1317</a>                                                                                     |
| <a href="#">1518</a> | 548.75   | 1095.48  | 1095.48  | -0.32 | 0    | 76    | 6.3e-008 | 1    | R.DGGVQACFSR.S <a href="#">1515</a> <a href="#">1516</a> <a href="#">1517</a> <a href="#">1519</a> <a href="#">1520</a> |
| <a href="#">4188</a> | 881.46   | 1760.91  | 1760.91  | 4.32  | 0    | 41    | 0.00065  | 1    | R.ISQSNYIPTQQDVLRT                                                                                                      |

36. [ATP9A\\_HUMAN](#) Mass: 119989 Score: 483 Queries matched: 27 emPAI: 0.20

Probable phospholipid-transporting ATPase IIA OS=Homo sapiens GN=ATP9A PE=1 SV=3

| Query                | Observed | Mr(expt) | Mr(calc) | ppm   | Miss | Score | Expect   | Rank | Peptide                                                                                                                                                                     |
|----------------------|----------|----------|----------|-------|------|-------|----------|------|-----------------------------------------------------------------------------------------------------------------------------------------------------------------------------|
| <a href="#">143</a>  | 415.23   | 828.44   | 828.45   | -2.28 | 0    | 17    | 0.13     | 1    | R.NVINNQK.Y <a href="#">145</a> <a href="#">146</a> <a href="#">147</a> <a href="#">148</a> <a href="#">149</a> <a href="#">150</a> <a href="#">151</a> <a href="#">152</a> |
| <a href="#">713</a>  | 472.75   | 943.49   | 943.49   | -2.32 | 0    | 48    | 0.00015  | 1    | R.LPVACTQR.L <a href="#">715</a>                                                                                                                                            |
| <a href="#">787</a>  | 482.73   | 963.44   | 963.44   | -0.31 | 0    | 59    | 7.3e-006 | 1    | R.DQSSMQLR.T <a href="#">781</a> <a href="#">782</a> <a href="#">783</a> <a href="#">784</a>                                                                                |
| <a href="#">1015</a> | 503.24   | 1004.47  | 1004.47  | 2.98  | 0    | 68    | 1.2e-006 | 1    | R.SVMNTSNPR.S <a href="#">1009</a> <a href="#">1010</a> <a href="#">1011</a> <a href="#">1012</a> <a href="#">1013</a> <a href="#">1014</a>                                 |
| <a href="#">1092</a> | 511.24   | 1020.47  | 1020.47  | 3.25  | 0    | (16)  | 0.1      | 1    | R.SVMNTSNPR.S <a href="#">1091</a>                                                                                                                                          |
| <a href="#">1346</a> | 531.30   | 1060.58  | 1060.57  | 4.16  | 0    | 50    | 7.4e-005 | 1    | R.VPADMIFLR.T                                                                                                                                                               |
| <a href="#">2671</a> | 654.29   | 1306.57  | 1306.57  | 3.82  | 0    | 73    | 1.7e-007 | 1    | R.TDQLDGETDWK.L                                                                                                                                                             |

37. [MYO1C\\_HUMAN](#) Mass: 122461 Score: 473 Queries matched: 10 emPAI: 0.13

Unconventional myosin-Ic OS=Homo sapiens GN=MYO1C PE=1 SV=4

| Query                | Observed | Mr(expt) | Mr(calc) | ppm   | Miss | Score | Expect   | Rank | Peptide                                                                                           |
|----------------------|----------|----------|----------|-------|------|-------|----------|------|---------------------------------------------------------------------------------------------------|
| <a href="#">914</a>  | 494.26   | 986.51   | 986.50   | 8.67  | 0    | 53    | 5.6e-005 | 1    | R.LGTDEISPR.V                                                                                     |
| <a href="#">1408</a> | 538.26   | 1074.51  | 1074.51  | -2.20 | 0    | 54    | 2.3e-005 | 1    | K.DNYPQSVPR.L <a href="#">1406</a> <a href="#">1407</a> <a href="#">1409</a> <a href="#">1410</a> |
| <a href="#">1630</a> | 559.79   | 1117.57  | 1117.57  | 1.79  | 0    | 53    | 5.5e-005 | 1    | K.IICDLVEEK.F                                                                                     |
| <a href="#">2855</a> | 675.32   | 1348.63  | 1348.63  | -0.56 | 0    | 119   | 8e-012   | 1    | R.DQAVMISGESGAGK.T <a href="#">2852</a> <a href="#">2853</a>                                      |



38. [GNAS1\\_HUMAN](#) Mass: 111697 Score: 461 Queries matched: 15 emPAI: 0.14  
 Guanine nucleotide-binding protein G(s) subunit alpha isoforms XLas OS=Homo sapiens GN=GNAS PE=1 SV=2

| Query                | Observed | Mr(expt) | Mr(calc) | ppm   | Miss | Score | Expect   | Rank | Peptide                                                                                                                      |
|----------------------|----------|----------|----------|-------|------|-------|----------|------|------------------------------------------------------------------------------------------------------------------------------|
| <a href="#">296</a>  | 432.22   | 862.42   | 862.41   | 1.28  | 0    | 67    | 2.1e-006 | 1    | R.ISTASGDGR.H <a href="#">295</a> <a href="#">298</a> <a href="#">300</a> <a href="#">303</a> <a href="#">306</a>            |
| <a href="#">1316</a> | 529.32   | 1056.62  | 1056.62  | 0.47  | 0    | 73    | 2.5e-007 | 1    | R.LLLLGGESGK.S <a href="#">1317</a>                                                                                          |
| <a href="#">1509</a> | 547.81   | 1093.61  | 1093.60  | 6.90  | 0    | 64    | 1.7e-006 | 1    | R.VLTSGIFETK.F                                                                                                               |
| <a href="#">4232</a> | 887.89   | 1773.77  | 1773.77  | -1.35 | 0    | 65    | 8.5e-007 | 1    | R.YTTPEDATPEPGEPR.V <a href="#">4231</a> <a href="#">4233</a> <a href="#">4234</a> <a href="#">4235</a> <a href="#">4236</a> |

## Proteins matching the same set of peptides:

[GNAS2\\_HUMAN](#) Mass: 46092 Score: 461 Queries matched: 15  
 Guanine nucleotide-binding protein G(s) subunit alpha isoforms short OS=Homo sapiens GN=GNAS PE=1 SV=1

39. [RHOG\\_HUMAN](#) Mass: 21751 Score: 455 Queries matched: 14 emPAI: 0.38  
 Rho-related GTP-binding protein RhoG OS=Homo sapiens GN=RHOG PE=1 SV=1

| Query                | Observed | Mr(expt) | Mr(calc) | ppm   | Miss | Score | Expect   | Rank | Peptide                                                                                                                                                            |
|----------------------|----------|----------|----------|-------|------|-------|----------|------|--------------------------------------------------------------------------------------------------------------------------------------------------------------------|
| <a href="#">1326</a> | 530.78   | 1059.54  | 1059.54  | -1.74 | 0    | 69    | 1.7e-006 | 1    | K.CVVVGDGAVGK.T <a href="#">1324</a> <a href="#">1325</a> <a href="#">1327</a> <a href="#">1328</a> <a href="#">1329</a> <a href="#">1330</a> <a href="#">1331</a> |
| <a href="#">4213</a> | 882.97   | 1763.92  | 1763.92  | 0.28  | 0    | 65    | 1.6e-006 | 1    | K.EQGQAPITPQQGQALAK.Q <a href="#">4211</a> <a href="#">4212</a> <a href="#">4214</a> <a href="#">4215</a> <a href="#">4216</a>                                     |

40. [MGA\\_HUMAN](#) Mass: 211031 Score: 447 Queries matched: 29 emPAI: 0.11  
 Maltase-glucoamylase, intestinal OS=Homo sapiens GN=MGAM PE=1 SV=5

| Query                | Observed | Mr(expt) | Mr(calc) | ppm   | Miss | Score | Expect   | Rank | Peptide                                                                                                                                                                                                                                                      |
|----------------------|----------|----------|----------|-------|------|-------|----------|------|--------------------------------------------------------------------------------------------------------------------------------------------------------------------------------------------------------------------------------------------------------------|
| <a href="#">21</a>   | 402.70   | 803.38   | 803.38   | 0.40  | 0    | 18    | 0.13     | 1    | R.DQPPGYK.K <a href="#">22</a> <a href="#">24</a>                                                                                                                                                                                                            |
| <a href="#">189</a>  | 419.71   | 837.40   | 837.40   | -1.80 | 0    | 44    | 0.0002   | 1    | R.STFPSSGR.W <a href="#">184</a> <a href="#">185</a> <a href="#">186</a> <a href="#">188</a> <a href="#">190</a> <a href="#">191</a> <a href="#">192</a> <a href="#">193</a> <a href="#">194</a> <a href="#">195</a> <a href="#">196</a> <a href="#">197</a> |
| <a href="#">563</a>  | 456.74   | 911.46   | 911.46   | 0.12  | 0    | 43    | 0.00027  | 1    | R.NHNTIGTR.R                                                                                                                                                                                                                                                 |
| <a href="#">770</a>  | 481.24   | 960.46   | 960.46   | -0.15 | 0    | 55    | 2.3e-005 | 1    | K.LTDQTNRR.F <a href="#">771</a>                                                                                                                                                                                                                             |
| <a href="#">1264</a> | 524.79   | 1047.56  | 1047.56  | -0.14 | 0    | 53    | 5e-005   | 1    | R.QLDFTLSFK.F                                                                                                                                                                                                                                                |
| <a href="#">2526</a> | 641.83   | 1281.64  | 1281.64  | -0.06 | 0    | 63    | 3.9e-006 | 1    | R.INCIPDQPPTK.A <a href="#">2524</a> <a href="#">2525</a> <a href="#">2527</a> <a href="#">2528</a> <a href="#">2529</a> <a href="#">2530</a>                                                                                                                |
| <a href="#">4142</a> | 872.91   | 1743.81  | 1743.81  | 1.49  | 0    | 59    | 5.2e-006 | 1    | R.EIEELYNNPQNPERS                                                                                                                                                                                                                                            |
| <a href="#">4742</a> | 682.34   | 2043.99  | 2043.99  | 1.80  | 0    | 11    | 0.42     | 1    | K.HNGVPSQTSPTVTYDSNLK.V                                                                                                                                                                                                                                      |

41. [ARRD1\\_HUMAN](#) Mass: 46352 Score: 446 Queries matched: 9 emPAI: 0.36  
 Arrestin domain-containing protein 1 OS=Homo sapiens GN=ARRDC1 PE=2 SV=1

| Query                | Observed | Mr(expt) | Mr(calc) | ppm   | Miss | Score | Expect   | Rank | Peptide                                                                         |
|----------------------|----------|----------|----------|-------|------|-------|----------|------|---------------------------------------------------------------------------------|
| <a href="#">333</a>  | 435.76   | 869.51   | 869.51   | 1.88  | 0    | 39    | 0.0006   | 1    | R.LGAPLPR.A                                                                     |
| <a href="#">875</a>  | 491.27   | 980.53   | 980.53   | 3.43  | 1    | 1     | 4.4      | 6    | K.RWIHDVR.T                                                                     |
| <a href="#">1403</a> | 537.29   | 1072.57  | 1072.58  | -1.63 | 0    | 78    | 1.5e-007 | 1    | R.TIAEVEGAGVK.A                                                                 |
| <a href="#">2520</a> | 641.30   | 1280.58  | 1280.59  | -3.26 | 0    | 93    | 2.4e-009 | 1    | R.VTCIGSCGVSNK.A <a href="#">2521</a> <a href="#">2522</a> <a href="#">2523</a> |
| <a href="#">3209</a> | 722.89   | 1443.77  | 1443.77  | -3.29 | 0    | 72    | 4.6e-007 | 1    | R.VVYSPGEPLAGTVR.V <a href="#">3210</a>                                         |

42. [HSP7C\\_HUMAN](#) Mass: 71082 Score: 443 Queries matched: 14 emPAI: 0.36  
 Heat shock cognate 71 kDa protein OS=Homo sapiens GN=HSPA8 PE=1 SV=1

| Query                | Observed | Mr(expt) | Mr(calc) | ppm   | Miss | Score | Expect   | Rank | Peptide                                                                                                                  |
|----------------------|----------|----------|----------|-------|------|-------|----------|------|--------------------------------------------------------------------------------------------------------------------------|
| <a href="#">26</a>   | 402.73   | 803.44   | 803.44   | 0.24  | 0    | 30    | 0.016    | 1    | K.ITITNDK.G <a href="#">27</a>                                                                                           |
| <a href="#">171</a>  | 417.70   | 833.40   | 833.40   | 0.03  | 0    | 32    | 0.0062   | 1    | R.MVQEAEK.Y <a href="#">172</a>                                                                                          |
| <a href="#">716</a>  | 472.77   | 943.52   | 943.52   | 2.20  | 0    | 43    | 0.00046  | 1    | K.VCNPIITK.L                                                                                                             |
| <a href="#">2238</a> | 614.81   | 1227.61  | 1227.62  | -6.20 | 0    | 75    | 2.6e-007 | 1    | K.VEIIANDQGNR.T <a href="#">2239</a> <a href="#">2240</a> <a href="#">2241</a> <a href="#">2242</a> <a href="#">2244</a> |
| <a href="#">2647</a> | 652.30   | 1302.59  | 1302.59  | 0.00  | 0    | 55    | 1.4e-005 | 1    | K.NSLESYAFNMK.A                                                                                                          |
| <a href="#">3871</a> | 825.41   | 1648.80  | 1648.79  | 6.54  | 0    | 56    | 1.8e-005 | 1    | K.NQVAMNPNTVFDK.R                                                                                                        |
| <a href="#">4267</a> | 596.67   | 1786.98  | 1786.98  | -0.33 | 1    | 7     | 0.39     | 1    | R.IINEPTAAAIAYGLDKK.V                                                                                                    |

43. [SPIT1\\_HUMAN](#) Mass: 60128 Score: 434 Queries matched: 12 emPAI: 0.27  
 Kunitz-type protease inhibitor 1 OS=Homo sapiens GN=SPINT1 PE=1 SV=2

| Query | Observed | Mr(expt) | Mr(calc) | ppm | Miss | Score | Expect | Rank | Peptide |
|-------|----------|----------|----------|-----|------|-------|--------|------|---------|
|-------|----------|----------|----------|-----|------|-------|--------|------|---------|

|                                                                             |                             |             |            |                     |             |       |          |      |                                                                                                                                                                    |
|-----------------------------------------------------------------------------|-----------------------------|-------------|------------|---------------------|-------------|-------|----------|------|--------------------------------------------------------------------------------------------------------------------------------------------------------------------|
| <a href="#">110</a>                                                         | 411.73                      | 821.45      | 821.45     | 4.71                | 1           | 8     | 0.67     | 3    | R.SYRQLR.T                                                                                                                                                         |
| <a href="#">1156</a>                                                        | 517.73                      | 1033.45     | 1033.45    | 4.27                | 0           | 33    | 0.0014   | 1    | K.DVENTDWR.L                                                                                                                                                       |
| <a href="#">1228</a>                                                        | 522.80                      | 1043.58     | 1043.57    | 6.44                | 1           | 9     | 1.1      | 4    | R.LLRGDTDVR.V                                                                                                                                                      |
| <a href="#">1263</a>                                                        | 524.78                      | 1047.54     | 1047.53    | 7.42                | 0           | 48    | 0.00015  | 1    | R.TQFGGSGIPK.A <a href="#">1262</a>                                                                                                                                |
| <a href="#">1831</a>                                                        | 575.85                      | 1149.68     | 1149.68    | 1.49                | 0           | 10    | 0.21     | 1    | K.VQPQEPVLK.D                                                                                                                                                      |
| <a href="#">2752</a>                                                        | 664.79                      | 1327.57     | 1327.57    | -3.14               | 0           | 91    | 1.9e-009 | 1    | K.QTEDYCLSNK.V <a href="#">2751</a> <a href="#">2753</a> <a href="#">2754</a> <a href="#">2758</a>                                                                 |
| <a href="#">3411</a>                                                        | 751.84                      | 1501.66     | 1501.65    | 1.06                | 0           | 57    | 5.1e-006 | 1    | R.WYYPTEQICK.S                                                                                                                                                     |
| <hr/>                                                                       |                             |             |            |                     |             |       |          |      |                                                                                                                                                                    |
| 44.                                                                         | <a href="#">CDC42_HUMAN</a> | Mass: 21587 | Score: 424 | Queries matched: 13 | emPAI: 0.39 |       |          |      |                                                                                                                                                                    |
| Cell division control protein 42 homolog OS=Homo sapiens GN=CDC42 PE=1 SV=2 |                             |             |            |                     |             |       |          |      |                                                                                                                                                                    |
| Query                                                                       | Observed                    | Mr(expt)    | Mr(calc)   | ppm                 | Miss        | Score | Expect   | Rank | Peptide                                                                                                                                                            |
| <a href="#">500</a>                                                         | 452.72                      | 903.42      | 903.42     | -0.52               | 0           | 15    | 0.15     | 1    | R.DDPSTIEK.L                                                                                                                                                       |
| <a href="#">1326</a>                                                        | 530.78                      | 1059.54     | 1059.54    | -1.74               | 0           | 69    | 1.7e-006 | 1    | K.CVVVGDGAVGK.T <a href="#">1324</a> <a href="#">1325</a> <a href="#">1327</a> <a href="#">1328</a> <a href="#">1329</a> <a href="#">1330</a> <a href="#">1331</a> |
| <a href="#">2085</a>                                                        | 599.79                      | 1197.57     | 1197.57    | 1.90                | 0           | 81    | 4.3e-008 | 1    | K.YVECSALTQK.G <a href="#">2082</a> <a href="#">2083</a> <a href="#">2086</a>                                                                                      |
| <hr/>                                                                       |                             |             |            |                     |             |       |          |      |                                                                                                                                                                    |
| 45.                                                                         | <a href="#">MPI_HUMAN</a>   | Mass: 47196 | Score: 417 | Queries matched: 5  | emPAI: 0.08 |       |          |      |                                                                                                                                                                    |
| Mannose-6-phosphate isomerase OS=Homo sapiens GN=MPI PE=1 SV=2              |                             |             |            |                     |             |       |          |      |                                                                                                                                                                    |
| Query                                                                       | Observed                    | Mr(expt)    | Mr(calc)   | ppm                 | Miss        | Score | Expect   | Rank | Peptide                                                                                                                                                            |
| <a href="#">4225</a>                                                        | 887.34                      | 1772.66     | 1772.66    | -1.57               | 0           | 112   | 5.8e-012 | 1    | K.GDCVECMACSDNTR.A <a href="#">4226</a> <a href="#">4227</a> <a href="#">4228</a> <a href="#">4229</a>                                                             |
| <hr/>                                                                       |                             |             |            |                     |             |       |          |      |                                                                                                                                                                    |
| 46.                                                                         | <a href="#">PCBP1_HUMAN</a> | Mass: 37987 | Score: 417 | Queries matched: 10 | emPAI: 0.21 |       |          |      |                                                                                                                                                                    |
| Poly(rC)-binding protein 1 OS=Homo sapiens GN=PCBP1 PE=1 SV=2               |                             |             |            |                     |             |       |          |      |                                                                                                                                                                    |
| Query                                                                       | Observed                    | Mr(expt)    | Mr(calc)   | ppm                 | Miss        | Score | Expect   | Rank | Peptide                                                                                                                                                            |
| <a href="#">1463</a>                                                        | 543.78                      | 1085.55     | 1085.55    | -0.83               | 0           | 61    | 5.1e-006 | 1    | K.IANPVEGSSGR.Q <a href="#">1462</a>                                                                                                                               |
| <a href="#">2557</a>                                                        | 644.80                      | 1287.59     | 1287.59    | 1.53                | 0           | 67    | 8.4e-007 | 1    | R.INISEGNCPER.I <a href="#">2551</a> <a href="#">2552</a> <a href="#">2553</a> <a href="#">2554</a> <a href="#">2555</a> <a href="#">2556</a> <a href="#">2558</a> |
| <hr/>                                                                       |                             |             |            |                     |             |       |          |      |                                                                                                                                                                    |
| 47.                                                                         | <a href="#">HSP71_HUMAN</a> | Mass: 70294 | Score: 415 | Queries matched: 17 | emPAI: 0.29 |       |          |      |                                                                                                                                                                    |
| Heat shock 70 kDa protein 1A/1B OS=Homo sapiens GN=HSPA1A PE=1 SV=5         |                             |             |            |                     |             |       |          |      |                                                                                                                                                                    |
| Query                                                                       | Observed                    | Mr(expt)    | Mr(calc)   | ppm                 | Miss        | Score | Expect   | Rank | Peptide                                                                                                                                                            |
| <a href="#">26</a>                                                          | 402.73                      | 803.44      | 803.44     | 0.24                | 0           | 30    | 0.016    | 1    | K.ITITNDK.G <a href="#">27</a>                                                                                                                                     |
| <a href="#">171</a>                                                         | 417.70                      | 833.40      | 833.40     | 0.03                | 0           | 32    | 0.0062   | 1    | R.MVQEAEK.Y <a href="#">172</a>                                                                                                                                    |
| <a href="#">484</a>                                                         | 451.74                      | 901.47      | 901.48     | -1.65               | 0           | 29    | 0.013    | 1    | R.STLEPVEK.A <a href="#">485</a>                                                                                                                                   |
| <a href="#">719</a>                                                         | 474.24                      | 946.46      | 946.46     | -0.06               | 0           | 42    | 0.00051  | 1    | K.SAVEDEGLK.G <a href="#">720</a> <a href="#">721</a>                                                                                                              |
| <a href="#">1708</a>                                                        | 566.79                      | 1131.57     | 1131.58    | -3.69               | 1           | 3     |          | 5    | K.SAVEDEGLKGI.I <a href="#">1709</a>                                                                                                                               |
| <a href="#">2238</a>                                                        | 614.81                      | 1227.61     | 1227.62    | -6.20               | 0           | 75    | 2.6e-007 | 1    | K.VEIITANDQGNR.T <a href="#">2239</a> <a href="#">2240</a> <a href="#">2241</a> <a href="#">2242</a> <a href="#">2244</a>                                          |
| <hr/>                                                                       |                             |             |            |                     |             |       |          |      |                                                                                                                                                                    |
| 48.                                                                         | <a href="#">ENO1_HUMAN</a>  | Mass: 47481 | Score: 410 | Queries matched: 12 | emPAI: 0.70 |       |          |      |                                                                                                                                                                    |
| Alpha-enolase OS=Homo sapiens GN=ENO1 PE=1 SV=2                             |                             |             |            |                     |             |       |          |      |                                                                                                                                                                    |
| Query                                                                       | Observed                    | Mr(expt)    | Mr(calc)   | ppm                 | Miss        | Score | Expect   | Rank | Peptide                                                                                                                                                            |
| <a href="#">32</a>                                                          | 403.73                      | 805.45      | 805.44     | 1.45                | 0           | 29    | 0.007    | 1    | K.YNQLLR.I                                                                                                                                                         |
| <a href="#">45</a>                                                          | 405.73                      | 809.44      | 809.44     | 1.99                | 0           | 43    | 0.00018  | 1    | K.AVEHINK.T                                                                                                                                                        |
| <a href="#">504</a>                                                         | 452.73                      | 903.45      | 903.45     | -1.18               | 0           | 53    | 6.3e-005 | 1    | R.IEELGSK.A <a href="#">501</a> <a href="#">502</a> <a href="#">503</a> <a href="#">505</a> <a href="#">506</a>                                                    |
| <a href="#">1022</a>                                                        | 504.25                      | 1006.50     | 1006.49    | 1.25                | 0           | 36    | 0.0019   | 1    | K.SCNCLLK.V                                                                                                                                                        |
| <a href="#">3091</a>                                                        | 703.86                      | 1405.71     | 1405.71    | 1.24                | 0           | 98    | 1.5e-009 | 1    | R.GNPTVEVDLFTSK.G                                                                                                                                                  |
| <a href="#">3149</a>                                                        | 713.37                      | 1424.72     | 1424.72    | 1.97                | 0           | 37    | 0.0018   | 1    | R.YISPDQLADLYK.S                                                                                                                                                   |
| <a href="#">3812</a>                                                        | 817.42                      | 1632.83     | 1632.81    | 6.99                | 0           | 121   | 6.1e-012 | 1    | K.VNQIGSVTESLQACK.L                                                                                                                                                |
| <hr/>                                                                       |                             |             |            |                     |             |       |          |      |                                                                                                                                                                    |
| 49.                                                                         | <a href="#">K1C16_HUMAN</a> | Mass: 51578 | Score: 409 | Queries matched: 6  | emPAI: 0.15 |       |          |      |                                                                                                                                                                    |
| Keratin, type I cytoskeletal 16 OS=Homo sapiens GN=KRT16 PE=1 SV=4          |                             |             |            |                     |             |       |          |      |                                                                                                                                                                    |
| Query                                                                       | Observed                    | Mr(expt)    | Mr(calc)   | ppm                 | Miss        | Score | Expect   | Rank | Peptide                                                                                                                                                            |
| <a href="#">1566</a>                                                        | 553.77                      | 1105.52     | 1105.52    | 0.27                | 0           | 65    | 2.2e-006 | 1    | K.VTQNLNDR.L <a href="#">1567</a>                                                                                                                                  |
| <a href="#">4771</a>                                                        | 1052.48                     | 2102.95     | 2102.95    | 0.26                | 0           | 99    | 4.6e-010 | 1    | R.GQTGGDVNVEMDAAPGVLSR.I <a href="#">4770</a> <a href="#">4772</a> <a href="#">4773</a>                                                                            |

|                                                                                     |                              |             |            |                     |             |       |          |      |                                                                                                                                                                            |
|-------------------------------------------------------------------------------------|------------------------------|-------------|------------|---------------------|-------------|-------|----------|------|----------------------------------------------------------------------------------------------------------------------------------------------------------------------------|
| 50.                                                                                 | <a href="#">VP37B_HUMAN</a>  | Mass: 31345 | Score: 388 | Queries matched: 7  | emPAI: 0.41 |       |          |      |                                                                                                                                                                            |
| Vacuolar protein sorting-associated protein 37B OS=Homo sapiens GN=VPS37B PE=1 SV=1 |                              |             |            |                     |             |       |          |      |                                                                                                                                                                            |
| Query                                                                               | Observed                     | Mr(expt)    | Mr(calc)   | ppm                 | Miss        | Score | Expect   | Rank | Peptide                                                                                                                                                                    |
| <a href="#">597</a>                                                                 | 461.23                       | 920.44      | 920.44     | 4.28                | 0           | 25    | 0.025    | 1    | K.EMTLASNR.S                                                                                                                                                               |
| <a href="#">2785</a>                                                                | 667.32                       | 1332.63     | 1332.63    | -0.06               | 0           | 96    | 1.8e-009 | 1    | K.MEETQNVQLNK.E <a href="#">2783</a> <a href="#">2784</a> <a href="#">2786</a>                                                                                             |
| <a href="#">2854</a>                                                                | 675.32                       | 1348.63     | 1348.63    | -1.46               | 0           | (88)  | 1.1e-008 | 1    | K.MEETQNVQLNK.E <a href="#">2856</a>                                                                                                                                       |
| 51.                                                                                 | <a href="#">ANXA1_HUMAN</a>  | Mass: 38918 | Score: 386 | Queries matched: 10 | emPAI: 0.44 |       |          |      |                                                                                                                                                                            |
| Annexin A1 OS=Homo sapiens GN=ANXA1 PE=1 SV=2                                       |                              |             |            |                     |             |       |          |      |                                                                                                                                                                            |
| Query                                                                               | Observed                     | Mr(expt)    | Mr(calc)   | ppm                 | Miss        | Score | Expect   | Rank | Peptide                                                                                                                                                                    |
| <a href="#">153</a>                                                                 | 415.26                       | 828.51      | 828.51     | 2.88                | 0           | 12    | 0.39     | 1    | R.NALLSLAK.G                                                                                                                                                               |
| <a href="#">583</a>                                                                 | 458.75                       | 915.49      | 915.48     | 1.46                | 0           | 47    | 0.00025  | 1    | K.ILVALCGGN.- <a href="#">582</a>                                                                                                                                          |
| <a href="#">1426</a>                                                                | 540.75                       | 1079.48     | 1079.48    | 1.90                | 0           | 30    | 0.0055   | 1    | R.SEIDMNDIK.A                                                                                                                                                              |
| <a href="#">2154</a>                                                                | 607.27                       | 1212.52     | 1212.53    | -4.25               | 0           | 78    | 3.2e-008 | 1    | K.DITSDTSGDFR.N <a href="#">2155</a> <a href="#">2156</a> <a href="#">2157</a> <a href="#">2158</a>                                                                        |
| <a href="#">2430</a>                                                                | 631.81                       | 1261.60     | 1261.59    | 2.01                | 0           | 90    | 8e-009   | 1    | K.TPAQFDADLR.A                                                                                                                                                             |
| 52.                                                                                 | <a href="#">ALDOA_HUMAN</a>  | Mass: 39851 | Score: 384 | Queries matched: 11 | emPAI: 0.88 |       |          |      |                                                                                                                                                                            |
| Fructose-bisphosphate aldolase A OS=Homo sapiens GN=ALDOA PE=1 SV=2                 |                              |             |            |                     |             |       |          |      |                                                                                                                                                                            |
| Query                                                                               | Observed                     | Mr(expt)    | Mr(calc)   | ppm                 | Miss        | Score | Expect   | Rank | Peptide                                                                                                                                                                    |
| <a href="#">12</a>                                                                  | 401.25                       | 800.48      | 800.48     | 7.00                | 0           | 46    | 0.00033  | 1    | R.ALQASALK.A                                                                                                                                                               |
| <a href="#">617</a>                                                                 | 464.21                       | 926.42      | 926.42     | -1.56               | 0           | 36    | 0.00065  | 1    | R.CQYVTEK.V                                                                                                                                                                |
| <a href="#">1227</a>                                                                | 522.79                       | 1043.56     | 1043.56    | -0.68               | 0           | 47    | 0.00018  | 1    | R.QLLLTADDR.V                                                                                                                                                              |
| <a href="#">1368</a>                                                                | 533.26                       | 1064.50     | 1064.50    | -3.72               | 1           | 6     | 1.7      | 3    | K.DGADFAKWR.C <a href="#">1367</a>                                                                                                                                         |
| <a href="#">1505</a>                                                                | 547.29                       | 1092.56     | 1092.56    | 0.03                | 1           | 16    | 0.19     | 1    | K.AAQEEYVKR.A                                                                                                                                                              |
| <a href="#">1709</a>                                                                | 566.80                       | 1131.58     | 1131.57    | 7.37                | 0           | 85    | 3.1e-008 | 1    | R.ALANSLACQKG.Y <a href="#">1708</a>                                                                                                                                       |
| <a href="#">2780</a>                                                                | 666.86                       | 1331.70     | 1331.69    | 7.04                | 0           | 91    | 6.3e-009 | 1    | K.GILAADESTGSIK.R                                                                                                                                                          |
| <a href="#">3596</a>                                                                | 521.61                       | 1561.81     | 1561.81    | 0.10                | 1           | 25    | 0.024    | 1    | M.PYQYPALTPQKK.E                                                                                                                                                           |
| <a href="#">4924</a>                                                                | 1136.58                      | 2271.15     | 2271.13    | 5.41                | 0           | 132   | 3.9e-013 | 1    | K.GVVPLAGTNGETTTQGLDGLSER.C                                                                                                                                                |
| 53.                                                                                 | <a href="#">CAPN5_HUMAN</a>  | Mass: 74092 | Score: 381 | Queries matched: 18 | emPAI: 0.28 |       |          |      |                                                                                                                                                                            |
| Calpain-5 OS=Homo sapiens GN=CAPN5 PE=1 SV=2                                        |                              |             |            |                     |             |       |          |      |                                                                                                                                                                            |
| Query                                                                               | Observed                     | Mr(expt)    | Mr(calc)   | ppm                 | Miss        | Score | Expect   | Rank | Peptide                                                                                                                                                                    |
| <a href="#">16</a>                                                                  | 401.69                       | 801.36      | 801.36     | 0.50                | 0           | 34    | 0.001    | 1    | R.TDQPEGR.Y <a href="#">15</a> <a href="#">17</a>                                                                                                                          |
| <a href="#">241</a>                                                                 | 423.69                       | 845.37      | 845.37     | -0.64               | 0           | 36    | 0.0004   | 1    | K.GICEDPR.L <a href="#">237</a> <a href="#">238</a> <a href="#">239</a> <a href="#">240</a> <a href="#">242</a>                                                            |
| <a href="#">1161</a>                                                                | 517.75                       | 1033.49     | 1033.49    | 6.81                | 0           | 76    | 1.9e-007 | 1    | K.AVTAADMEAR.L <a href="#">1157</a> <a href="#">1158</a> <a href="#">1160</a>                                                                                              |
| <a href="#">1512</a>                                                                | 548.27                       | 1094.52     | 1094.52    | -1.46               | 0           | 44    | 0.00023  | 1    | K.GTSTPEYNVK.G <a href="#">1510</a> <a href="#">1511</a> <a href="#">1513</a>                                                                                              |
| <a href="#">2068</a>                                                                | 597.78                       | 1193.54     | 1193.55    | -8.00               | 0           | 45    | 0.00016  | 1    | R.VFTDVPSNCR.E                                                                                                                                                             |
| 54.                                                                                 | <a href="#">HSP90A_HUMAN</a> | Mass: 85006 | Score: 355 | Queries matched: 21 | emPAI: 0.24 |       |          |      |                                                                                                                                                                            |
| Heat shock protein HSP 90-alpha OS=Homo sapiens GN=HSP90AA1 PE=1 SV=5               |                              |             |            |                     |             |       |          |      |                                                                                                                                                                            |
| Query                                                                               | Observed                     | Mr(expt)    | Mr(calc)   | ppm                 | Miss        | Score | Expect   | Rank | Peptide                                                                                                                                                                    |
| <a href="#">302</a>                                                                 | 432.22                       | 862.42      | 862.42     | -1.75               | 0           | (21)  | 0.083    | 1    | R.EMLQSK.I <a href="#">297</a> <a href="#">298</a> <a href="#">299</a> <a href="#">301</a> <a href="#">303</a> <a href="#">304</a> <a href="#">305</a> <a href="#">306</a> |
| <a href="#">367</a>                                                                 | 440.22                       | 878.42      | 878.42     | 1.36                | 0           | 36    | 0.0024   | 1    | R.EMLQSK.I <a href="#">366</a>                                                                                                                                             |
| <a href="#">520</a>                                                                 | 453.71                       | 905.40      | 905.40     | 1.12                | 1           | 8     | 0.69     | 2    | K.EDKEEEK.E                                                                                                                                                                |
| <a href="#">774</a>                                                                 | 482.21                       | 962.41      | 962.41     | -0.50               | 0           | (43)  | 0.00016  | 1    | R.TDTGPEMGR.G <a href="#">775</a>                                                                                                                                          |
| <a href="#">861</a>                                                                 | 490.21                       | 978.41      | 978.41     | -1.54               | 0           | 49    | 2.6e-005 | 1    | R.TDTGPEMGR.G <a href="#">860</a> <a href="#">862</a>                                                                                                                      |
| <a href="#">2194</a>                                                                | 610.75                       | 1219.49     | 1219.48    | 1.14                | 0           | 57    | 2e-006   | 1    | R.DNSTMGYMAAK.K                                                                                                                                                            |
| <a href="#">2283</a>                                                                | 618.30                       | 1234.59     | 1234.59    | -3.06               | 0           | 80    | 6.7e-008 | 1    | K.DQVANSFVER.L <a href="#">2284</a> <a href="#">2285</a>                                                                                                                   |
| 55.                                                                                 | <a href="#">STOM_HUMAN</a>   | Mass: 31882 | Score: 351 | Queries matched: 8  | emPAI: 0.75 |       |          |      |                                                                                                                                                                            |
| Erythrocyte band 7 integral membrane protein OS=Homo sapiens GN=STOM PE=1 SV=3      |                              |             |            |                     |             |       |          |      |                                                                                                                                                                            |

| Query                                                                              | Observed                    | Mr(expt)     | Mr(calc)   | ppm                 | Miss        | Score | Expect   | Rank | Peptide                                                                                                                                                          |
|------------------------------------------------------------------------------------|-----------------------------|--------------|------------|---------------------|-------------|-------|----------|------|------------------------------------------------------------------------------------------------------------------------------------------------------------------|
| <a href="#">1020</a>                                                               | 503.73                      | 1005.45      | 1005.45    | -0.75               | 0           | 85    | 1.6e-008 | 1    | R.AMAAEAEASR.E <a href="#">1018</a> <a href="#">1019</a>                                                                                                         |
| <a href="#">1097</a>                                                               | 511.73                      | 1021.45      | 1021.45    | 1.18                | 0           | (73)  | 2.1e-007 | 1    | R.AMAAEAEASR.E                                                                                                                                                   |
| <a href="#">2346</a>                                                               | 624.31                      | 1246.60      | 1246.60    | -0.03               | 0           | (43)  | 0.00042  | 1    | K.VIAAEGEMNASR.A <a href="#">2347</a>                                                                                                                            |
| <a href="#">2439</a>                                                               | 632.30                      | 1262.59      | 1262.59    | 0.32                | 0           | 72    | 4.5e-007 | 1    | K.VIAAEGEMNASR.A                                                                                                                                                 |
| <a href="#">4486</a>                                                               | 965.51                      | 1929.00      | 1928.99    | 6.84                | 0           | 35    | 0.0018   | 1    | R.VQNATLAVANITNDSATR.L                                                                                                                                           |
| <hr/>                                                                              |                             |              |            |                     |             |       |          |      |                                                                                                                                                                  |
| 56.                                                                                | <a href="#">KINH_HUMAN</a>  | Mass: 110358 | Score: 348 | Queries matched: 4  | emPAI: 0.07 |       |          |      |                                                                                                                                                                  |
| Kinesin-1 heavy chain OS=Homo sapiens GN=KIF5B PE=1 SV=1                           |                             |              |            |                     |             |       |          |      |                                                                                                                                                                  |
| Query                                                                              | Observed                    | Mr(expt)     | Mr(calc)   | ppm                 | Miss        | Score | Expect   | Rank | Peptide                                                                                                                                                          |
| <a href="#">1892</a>                                                               | 580.79                      | 1159.57      | 1159.57    | 2.47                | 0           | 102   | 5.9e-010 | 1    | K.TGAEGAVLDEAK.N <a href="#">1891</a>                                                                                                                            |
| <a href="#">3578</a>                                                               | 776.34                      | 1550.67      | 1550.67    | 1.13                | 0           | 116   | 6.5e-012 | 1    | K.SAEIDSDDTGGSAAQK.Q <a href="#">3577</a>                                                                                                                        |
| <hr/>                                                                              |                             |              |            |                     |             |       |          |      |                                                                                                                                                                  |
| 57.                                                                                | <a href="#">ESPB1_HUMAN</a> | Mass: 27001  | Score: 344 | Queries matched: 9  | emPAI: 0.30 |       |          |      |                                                                                                                                                                  |
| Epididymal sperm-binding protein 1 OS=Homo sapiens GN=ELSPBP1 PE=1 SV=2            |                             |              |            |                     |             |       |          |      |                                                                                                                                                                  |
| Query                                                                              | Observed                    | Mr(expt)     | Mr(calc)   | ppm                 | Miss        | Score | Expect   | Rank | Peptide                                                                                                                                                          |
| <a href="#">2173</a>                                                               | 609.25                      | 1216.48      | 1216.48    | -1.48               | 0           | 57    | 2e-006   | 1    | K.YCQSEDYPR.C <a href="#">2170</a> <a href="#">2172</a> <a href="#">2174</a> <a href="#">2175</a> <a href="#">2177</a> <a href="#">2178</a> <a href="#">2179</a> |
| <a href="#">3546</a>                                                               | 773.83                      | 1545.65      | 1545.65    | -0.37               | 0           | 85    | 5.3e-009 | 1    | K.FCETNEYGGNSLR.K                                                                                                                                                |
| <hr/>                                                                              |                             |              |            |                     |             |       |          |      |                                                                                                                                                                  |
| 58.                                                                                | <a href="#">MELPH_HUMAN</a> | Mass: 66593  | Score: 343 | Queries matched: 6  | emPAI: 0.11 |       |          |      |                                                                                                                                                                  |
| Melanophilin OS=Homo sapiens GN=MLPH PE=1 SV=1                                     |                             |              |            |                     |             |       |          |      |                                                                                                                                                                  |
| Query                                                                              | Observed                    | Mr(expt)     | Mr(calc)   | ppm                 | Miss        | Score | Expect   | Rank | Peptide                                                                                                                                                          |
| <a href="#">3310</a>                                                               | 736.84                      | 1471.67      | 1471.67    | -1.91               | 0           | 68    | 6.9e-007 | 1    | K.SPQDPGDPVQYNR.T <a href="#">3309</a> <a href="#">3311</a>                                                                                                      |
| <a href="#">3654</a>                                                               | 791.83                      | 1581.65      | 1581.65    | 0.78                | 0           | 94    | 4.7e-010 | 1    | R.DSPQSLTDESCSEK.A <a href="#">3652</a> <a href="#">3653</a>                                                                                                     |
| <hr/>                                                                              |                             |              |            |                     |             |       |          |      |                                                                                                                                                                  |
| 59.                                                                                | <a href="#">ANX11_HUMAN</a> | Mass: 54697  | Score: 342 | Queries matched: 8  | emPAI: 0.14 |       |          |      |                                                                                                                                                                  |
| Annexin A11 OS=Homo sapiens GN=ANXA11 PE=1 SV=1                                    |                             |              |            |                     |             |       |          |      |                                                                                                                                                                  |
| Query                                                                              | Observed                    | Mr(expt)     | Mr(calc)   | ppm                 | Miss        | Score | Expect   | Rank | Peptide                                                                                                                                                          |
| <a href="#">158</a>                                                                | 416.23                      | 830.45       | 830.45     | -1.26               | 0           | 8     | 2        | 1    | K.TLEEAIR.S                                                                                                                                                      |
| <a href="#">2137</a>                                                               | 605.31                      | 1208.61      | 1208.61    | 3.50                | 1           | 4     | 2.9      | 4    | K.FNAVLCSRSR.A                                                                                                                                                   |
| <a href="#">2790</a>                                                               | 668.81                      | 1335.60      | 1335.61    | -0.66               | 0           | 87    | 1e-008   | 1    | R.DAQELYAAGENR.L <a href="#">2788</a> <a href="#">2789</a> <a href="#">2791</a> <a href="#">2792</a>                                                             |
| <a href="#">3290</a>                                                               | 733.33                      | 1464.65      | 1464.65    | -2.91               | 0           | 62    | 1.2e-006 | 1    | R.DESTNVDSLQQR.D                                                                                                                                                 |
| <hr/>                                                                              |                             |              |            |                     |             |       |          |      |                                                                                                                                                                  |
| 60.                                                                                | <a href="#">HSP76_HUMAN</a> | Mass: 71440  | Score: 341 | Queries matched: 10 | emPAI: 0.16 |       |          |      |                                                                                                                                                                  |
| Heat shock 70 kDa protein 6 OS=Homo sapiens GN=HSPA6 PE=1 SV=2                     |                             |              |            |                     |             |       |          |      |                                                                                                                                                                  |
| Query                                                                              | Observed                    | Mr(expt)     | Mr(calc)   | ppm                 | Miss        | Score | Expect   | Rank | Peptide                                                                                                                                                          |
| <a href="#">26</a>                                                                 | 402.73                      | 803.44       | 803.44     | 0.24                | 0           | 30    | 0.016    | 1    | K.ITITNDK.G <a href="#">27</a>                                                                                                                                   |
| <a href="#">484</a>                                                                | 451.74                      | 901.47       | 901.48     | -1.65               | 0           | 29    | 0.013    | 1    | R.STLEPVEK.A <a href="#">485</a>                                                                                                                                 |
| <a href="#">2238</a>                                                               | 614.81                      | 1227.61      | 1227.62    | -6.20               | 0           | 75    | 2.6e-007 | 1    | R.VEILANDQGNR.T <a href="#">2239</a> <a href="#">2240</a> <a href="#">2241</a> <a href="#">2242</a> <a href="#">2244</a>                                         |
| <hr/>                                                                              |                             |              |            |                     |             |       |          |      |                                                                                                                                                                  |
| 61.                                                                                | <a href="#">PPBT_HUMAN</a>  | Mass: 57611  | Score: 338 | Queries matched: 6  | emPAI: 0.13 |       |          |      |                                                                                                                                                                  |
| Alkaline phosphatase, tissue-nonspecific isozyme OS=Homo sapiens GN=ALPL PE=1 SV=4 |                             |              |            |                     |             |       |          |      |                                                                                                                                                                  |
| Query                                                                              | Observed                    | Mr(expt)     | Mr(calc)   | ppm                 | Miss        | Score | Expect   | Rank | Peptide                                                                                                                                                          |
| <a href="#">648</a>                                                                | 466.74                      | 931.46       | 931.46     | 1.15                | 0           | 30    | 0.0095   | 1    | R.DQAQETLK.Y                                                                                                                                                     |
| <a href="#">2907</a>                                                               | 681.34                      | 1360.66      | 1360.66    | -1.41               | 0           | 101   | 9.1e-010 | 1    | K.ANEGTVGVSAATER.S <a href="#">2904</a> <a href="#">2905</a> <a href="#">2906</a> <a href="#">2908</a>                                                           |
| <hr/>                                                                              |                             |              |            |                     |             |       |          |      |                                                                                                                                                                  |
| 62.                                                                                | <a href="#">MFGM_HUMAN</a>  | Mass: 43894  | Score: 338 | Queries matched: 14 | emPAI: 0.77 |       |          |      |                                                                                                                                                                  |
| Lactadherin OS=Homo sapiens GN=MFG8 PE=1 SV=2                                      |                             |              |            |                     |             |       |          |      |                                                                                                                                                                  |
| Query                                                                              | Observed                    | Mr(expt)     | Mr(calc)   | ppm                 | Miss        | Score | Expect   | Rank | Peptide                                                                                                                                                          |
| <a href="#">899</a>                                                                | 492.75                      | 983.49       | 983.49     | -1.13               | 0           | 32    | 0.0039   | 1    | K.QITASSSYK.T <a href="#">900</a> <a href="#">901</a>                                                                                                            |
| <a href="#">1739</a>                                                               | 568.75                      | 1135.48      | 1135.47    | 5.38                | 0           | 58    | 1.8e-006 | 1    | K.GYAGNHCEK.C                                                                                                                                                    |
| <a href="#">1790</a>                                                               | 572.82                      | 1143.63      | 1143.62    | 7.21                | 0           | 72    | 5.4e-007 | 1    | K.EVTGIITQGAR.N <a href="#">1788</a> <a href="#">1789</a>                                                                                                        |

|                      |        |         |         |      |   |      |          |   |                            |
|----------------------|--------|---------|---------|------|---|------|----------|---|----------------------------|
| <a href="#">1973</a> | 587.34 | 1172.66 | 1172.66 | 0.55 | 0 | 13   | 0.3      | 1 | K.NLFETPILAR.Y             |
| <a href="#">2840</a> | 673.84 | 1345.67 | 1345.67 | 1.77 | 0 | 42   | 0.00065  | 1 | R.NFGSVQFVASYK.V           |
| <a href="#">3038</a> | 696.36 | 1390.70 | 1390.70 | 0.69 | 0 | 104  | 2.9e-010 | 1 | R.MWVTGVVTQGASR.L          |
| <a href="#">3547</a> | 774.35 | 1546.68 | 1546.68 | 1.05 | 0 | 38   | 0.00041  | 1 | R.GDVFPSTCTCLK.G           |
| <a href="#">3648</a> | 527.25 | 1578.73 | 1578.73 | 1.55 | 0 | 3    | 2.3      | 1 | R.LYPTSCHTACTLR.F          |
| <a href="#">5034</a> | 806.40 | 2416.16 | 2416.15 | 6.98 | 0 | (11) | 0.33     | 1 | K.CVEPLGMENGNANSQIAASSVR.V |
| <a href="#">5057</a> | 811.73 | 2432.16 | 2432.14 | 5.61 | 0 | 20   | 0.052    | 1 | K.CVEPLGMENGNANSQIAASSVR.V |

63. [IPSP\\_HUMAN](#) Mass: 45760 Score: 337 Queries matched: 7 emPAI: 0.08

Plasma serine protease inhibitor OS=Homo sapiens GN=SERPINA5 PE=1 SV=3

Query Observed Mr(expt) Mr(calc) ppm Miss Score Expect Rank Peptide

|                      |        |         |         |       |   |    |          |   |                                                                                                                                               |
|----------------------|--------|---------|---------|-------|---|----|----------|---|-----------------------------------------------------------------------------------------------------------------------------------------------|
| <a href="#">1898</a> | 581.29 | 1160.57 | 1160.57 | -1.35 | 0 | 83 | 3.7e-008 | 1 | K.AVVEVDESCTR.A <a href="#">1895</a> <a href="#">1896</a> <a href="#">1899</a> <a href="#">1901</a> <a href="#">1902</a> <a href="#">1903</a> |
|----------------------|--------|---------|---------|-------|---|----|----------|---|-----------------------------------------------------------------------------------------------------------------------------------------------|

64. [KAP2\\_HUMAN](#) Mass: 45832 Score: 335 Queries matched: 13 emPAI: 0.48

cAMP-dependent protein kinase type II-alpha regulatory subunit OS=Homo sapiens GN=PRKAR2A PE=1 SV=2

Query Observed Mr(expt) Mr(calc) ppm Miss Score Expect Rank Peptide

|                      |        |         |         |       |   |      |          |   |                                                            |
|----------------------|--------|---------|---------|-------|---|------|----------|---|------------------------------------------------------------|
| <a href="#">100</a>  | 410.21 | 818.41  | 818.41  | -9.86 | 0 | 7    | 2.7      | 6 | K.SLEVSER.M <a href="#">102</a>                            |
| <a href="#">683</a>  | 469.72 | 937.42  | 937.43  | -7.12 | 0 | 22   | 0.023    | 2 | R.SVGQYDNR.G <a href="#">684</a>                           |
| <a href="#">1285</a> | 526.28 | 1050.54 | 1050.53 | 5.89  | 0 | 96   | 1.9e-009 | 1 | R.AASAYAVGDVK.C <a href="#">1283</a> <a href="#">1284</a>  |
| <a href="#">2028</a> | 594.29 | 1186.56 | 1186.56 | -0.60 | 0 | 48   | 6.9e-005 | 1 | K.DGQNQVEVIAR.C <a href="#">2027</a>                       |
| <a href="#">2739</a> | 662.81 | 1323.62 | 1323.61 | 1.73  | 0 | (40) | 0.00064  | 1 | K.MFGSSVDLGNLQ.- <a href="#">2740</a> <a href="#">2741</a> |
| <a href="#">2813</a> | 670.81 | 1339.61 | 1339.61 | 0.68  | 0 | 47   | 9.4e-005 | 1 | K.MFGSSVDLGNLQ.-                                           |

65. [HSP72\\_HUMAN](#) Mass: 70263 Score: 334 Queries matched: 12 emPAI: 0.11

Heat shock-related 70 kDa protein 2 OS=Homo sapiens GN=HSPA2 PE=1 SV=1

Query Observed Mr(expt) Mr(calc) ppm Miss Score Expect Rank Peptide

|                      |        |         |         |       |   |    |          |   |                                                                                                                         |
|----------------------|--------|---------|---------|-------|---|----|----------|---|-------------------------------------------------------------------------------------------------------------------------|
| <a href="#">26</a>   | 402.73 | 803.44  | 803.44  | 0.24  | 0 | 30 | 0.016    | 1 | K.ITITNDK.G <a href="#">27</a>                                                                                          |
| <a href="#">1416</a> | 538.75 | 1075.49 | 1075.49 | 0.43  | 1 | 3  | 1.8      | 3 | K.DEYEHKQK.E <a href="#">1417</a>                                                                                       |
| <a href="#">2238</a> | 614.81 | 1227.61 | 1227.62 | -6.20 | 0 | 75 | 2.6e-007 | 1 | K.VEIANDQGNR.T <a href="#">2239</a> <a href="#">2240</a> <a href="#">2241</a> <a href="#">2242</a> <a href="#">2244</a> |
| <a href="#">3938</a> | 840.40 | 1678.79 | 1678.80 | -4.01 | 0 | 4  |          | 2 | K.NQVAMNPTNTIFDAK.R                                                                                                     |
| <a href="#">4267</a> | 596.67 | 1786.98 | 1786.98 | -0.33 | 1 | 7  | 0.39     | 1 | R.IINEPTAAAIAYGLDKK.G                                                                                                   |

66. [MYO5B\\_HUMAN](#) Mass: 215135 Score: 334 Queries matched: 9 emPAI: 0.03

Unconventional myosin-Vb OS=Homo sapiens GN=MYO5B PE=1 SV=3

Query Observed Mr(expt) Mr(calc) ppm Miss Score Expect Rank Peptide

|                      |        |         |         |       |   |    |          |   |                                                                                                                             |
|----------------------|--------|---------|---------|-------|---|----|----------|---|-----------------------------------------------------------------------------------------------------------------------------|
| <a href="#">351</a>  | 437.22 | 872.43  | 872.44  | -0.64 | 0 | 6  | 1.7      | 4 | K.NDLNELR.K                                                                                                                 |
| <a href="#">506</a>  | 452.74 | 903.46  | 903.45  | 8.47  | 0 | 1  | 7.4      | 7 | R.LNVGMENK.V                                                                                                                |
| <a href="#">981</a>  | 501.27 | 1000.53 | 1000.53 | 2.26  | 1 | 35 | 0.0033   | 1 | K.NDLNELRK.A                                                                                                                |
| <a href="#">2843</a> | 673.85 | 1345.68 | 1345.68 | 0.32  | 0 | 96 | 2.4e-009 | 1 | K.NQSIIVSGESGAGK.T <a href="#">2841</a> <a href="#">2842</a> <a href="#">2844</a> <a href="#">2845</a> <a href="#">2846</a> |

67. [ANXA7\\_HUMAN](#) Mass: 52991 Score: 329 Queries matched: 8 emPAI: 0.31

Annexin A7 OS=Homo sapiens GN=ANXA7 PE=1 SV=3

Query Observed Mr(expt) Mr(calc) ppm Miss Score Expect Rank Peptide

|                      |        |         |         |      |   |      |          |   |                                                      |
|----------------------|--------|---------|---------|------|---|------|----------|---|------------------------------------------------------|
| <a href="#">448</a>  | 447.23 | 892.44  | 892.44  | 0.84 | 0 | 50   | 0.00011  | 1 | R.LYQAGEGR.L <a href="#">446</a> <a href="#">447</a> |
| <a href="#">1260</a> | 524.75 | 1047.48 | 1047.48 | 0.40 | 0 | 85   | 1.6e-008 | 1 | K.AMQGAGTQER.V <a href="#">1259</a>                  |
| <a href="#">1356</a> | 532.74 | 1063.48 | 1063.47 | 3.45 | 0 | (62) | 2.5e-006 | 1 | K.AMQGAGTQER.V <a href="#">1355</a>                  |
| <a href="#">1496</a> | 546.27 | 1090.53 | 1090.53 | 3.81 | 0 | 55   | 2.4e-005 | 1 | K.GAGTDDSTLVR.I                                      |

68. [CBPO\\_HUMAN](#) Mass: 43015 Score: 329 Queries matched: 10 emPAI: 0.28

Carboxypeptidase O OS=Homo sapiens GN=CPO PE=2 SV=1

Query Observed Mr(expt) Mr(calc) ppm Miss Score Expect Rank Peptide

|                     |        |        |        |      |   |    |         |   |                                                       |
|---------------------|--------|--------|--------|------|---|----|---------|---|-------------------------------------------------------|
| <a href="#">622</a> | 464.25 | 926.48 | 926.48 | 1.41 | 0 | 41 | 0.00044 | 1 | K.ISQPSGNPK.K <a href="#">621</a> <a href="#">623</a> |
|---------------------|--------|--------|--------|------|---|----|---------|---|-------------------------------------------------------|

[4496](#) 644.96 1931.87 1931.87 2.13 1 2 3 2 K.SRSPHNGTFCGTDLNR.N  
[4817](#) 1077.96 2153.90 2153.90 -1.20 0 112 6.8e-012 1 R.NCQDQTFCGTGPVSEPETK.A [4816](#) [4818](#) [4819](#) [4820](#) [4821](#)

69. [DAF\\_HUMAN](#) Mass: 42400 Score: 328 Queries matched: 13 emPAI: 0.53

Complement decay-accelerating factor OS=Homo sapiens GN=CD55 PE=1 SV=4

| Query                | Observed | Mr(expt) | Mr(calc) | ppm   | Miss | Score | Expect   | Rank | Peptide                                                                                           |
|----------------------|----------|----------|----------|-------|------|-------|----------|------|---------------------------------------------------------------------------------------------------|
| <a href="#">246</a>  | 424.70   | 847.39   | 847.39   | 0.26  | 0    | 42    | 0.00041  | 1    | R.SCEVPTR.L <a href="#">244</a> <a href="#">245</a>                                               |
| <a href="#">574</a>  | 457.26   | 912.51   | 912.50   | 2.60  | 1    | 33    | 0.0037   | 1    | R.REPSLSPK.L                                                                                      |
| <a href="#">1128</a> | 515.24   | 1028.47  | 1028.47  | -0.11 | 0    | 49    | 4.2e-005 | 1    | K.SCPNPGEIR.N <a href="#">1121</a> <a href="#">1122</a> <a href="#">1123</a> <a href="#">1127</a> |
| <a href="#">1386</a> | 535.75   | 1069.49  | 1069.49  | 0.29  | 0    | 62    | 2.3e-006 | 1    | R.QSVTYACNK.G <a href="#">1384</a> <a href="#">1385</a>                                           |
| <a href="#">3082</a> | 700.86   | 1399.70  | 1399.69  | 6.62  | 0    | 63    | 3.4e-006 | 1    | R.TSFPEDTVITYK.C                                                                                  |

70. [CBPM\\_HUMAN](#) Mass: 50938 Score: 326 Queries matched: 12 emPAI: 0.33

Carboxypeptidase M OS=Homo sapiens GN=CPM PE=1 SV=2

| Query                | Observed | Mr(expt) | Mr(calc) | ppm   | Miss | Score | Expect   | Rank | Peptide                                                                                                                                      |
|----------------------|----------|----------|----------|-------|------|-------|----------|------|----------------------------------------------------------------------------------------------------------------------------------------------|
| <a href="#">20</a>   | 402.24   | 802.46   | 802.46   | 4.06  | 0    | 33    | 0.0054   | 1    | R.IGIPEFK.Y                                                                                                                                  |
| <a href="#">229</a>  | 423.21   | 844.40   | 844.40   | 1.83  | 0    | 19    | 0.071    | 1    | K.HICPYR.T                                                                                                                                   |
| <a href="#">1085</a> | 509.76   | 1017.51  | 1017.52  | -2.84 | 0    | 40    | 0.00086  | 1    | R.QPETVAVMK.W <a href="#">1084</a>                                                                                                           |
| <a href="#">1288</a> | 526.76   | 1051.51  | 1051.50  | 5.82  | 0    | 51    | 5.1e-005 | 1    | R.QEGMEAFK.T                                                                                                                                 |
| <a href="#">2756</a> | 664.79   | 1327.57  | 1327.58  | -3.63 | 0    | 61    | 1.9e-006 | 1    | R.ENYNQYDLNR.N <a href="#">2755</a> <a href="#">2757</a> <a href="#">2759</a> <a href="#">2760</a> <a href="#">2761</a> <a href="#">2762</a> |

71. [SEMG2\\_HUMAN](#) Mass: 65519 Score: 325 Queries matched: 9 emPAI: 0.18

Semenogelin-2 OS=Homo sapiens GN=SEMG2 PE=1 SV=1

| Query                | Observed | Mr(expt) | Mr(calc) | ppm   | Miss | Score | Expect   | Rank | Peptide                                                                        |
|----------------------|----------|----------|----------|-------|------|-------|----------|------|--------------------------------------------------------------------------------|
| <a href="#">39</a>   | 405.21   | 808.41   | 808.41   | -3.13 | 0    | 7     | 1.5      | 8    | K.ISYPSSR.T <a href="#">43</a>                                                 |
| <a href="#">854</a>  | 488.74   | 975.46   | 975.46   | 0.77  | 0    | 38    | 0.001    | 1    | K.EQASASGAQK.G                                                                 |
| <a href="#">2141</a> | 605.77   | 1209.53  | 1209.53  | 0.87  | 0    | 66    | 8.6e-007 | 1    | K.GLSSQCSNTEK.R <a href="#">2140</a>                                           |
| <a href="#">2546</a> | 643.80   | 1285.58  | 1285.58  | -1.34 | 0    | 74    | 1.5e-007 | 1    | K.ISYQSSSTEER.H <a href="#">2544</a> <a href="#">2545</a> <a href="#">2547</a> |

72. [KCY\\_HUMAN](#) Mass: 22436 Score: 324 Queries matched: 7 emPAI: 0.37

UMP-CMP kinase OS=Homo sapiens GN=CMPK1 PE=1 SV=3

| Query                | Observed | Mr(expt) | Mr(calc) | ppm  | Miss | Score | Expect   | Rank | Peptide                                                                         |
|----------------------|----------|----------|----------|------|------|-------|----------|------|---------------------------------------------------------------------------------|
| <a href="#">2797</a> | 669.30   | 1336.58  | 1336.58  | 1.14 | 0    | (65)  | 6.4e-007 | 1    | R.EMDQTMAANAQK.N <a href="#">2795</a> <a href="#">2796</a> <a href="#">2798</a> |
| <a href="#">2875</a> | 677.29   | 1352.57  | 1352.57  | 0.10 | 0    | (71)  | 1.4e-007 | 1    | R.EMDQTMAANAQK.N                                                                |
| <a href="#">2876</a> | 677.29   | 1352.57  | 1352.57  | 2.54 | 0    | 75    | 6.4e-008 | 1    | R.EMDQTMAANAQK.N <a href="#">2874</a>                                           |

73. [GRP78\\_HUMAN](#) Mass: 72402 Score: 323 Queries matched: 7 emPAI: 0.05

78 kDa glucose-regulated protein OS=Homo sapiens GN=HSPA5 PE=1 SV=2

| Query                | Observed | Mr(expt) | Mr(calc) | ppm   | Miss | Score | Expect   | Rank | Peptide                                                                                                                 |
|----------------------|----------|----------|----------|-------|------|-------|----------|------|-------------------------------------------------------------------------------------------------------------------------|
| <a href="#">496</a>  | 452.24   | 902.47   | 902.47   | 1.85  | 0    | 9     | 1.3      | 7    | R.VMEHFIK.L                                                                                                             |
| <a href="#">2238</a> | 614.81   | 1227.61  | 1227.62  | -6.20 | 0    | 75    | 2.6e-007 | 1    | R.VEIANDQGNR.I <a href="#">2239</a> <a href="#">2240</a> <a href="#">2241</a> <a href="#">2242</a> <a href="#">2244</a> |

74. [RB27A\\_HUMAN](#) Mass: 25137 Score: 323 Queries matched: 7 emPAI: 0.53

Ras-related protein Rab-27A OS=Homo sapiens GN=RAB27A PE=1 SV=3

| Query                | Observed | Mr(expt) | Mr(calc) | ppm  | Miss | Score | Expect   | Rank | Peptide                                                                                        |
|----------------------|----------|----------|----------|------|------|-------|----------|------|------------------------------------------------------------------------------------------------|
| <a href="#">293</a>  | 431.70   | 861.38   | 861.38   | 0.33 | 0    | 57    | 5.6e-006 | 1    | K.SDLEDQR.V                                                                                    |
| <a href="#">417</a>  | 444.71   | 887.41   | 887.41   | 1.02 | 0    | 74    | 1.2e-007 | 1    | R.ASGPDGATGR.G <a href="#">415</a> <a href="#">416</a> <a href="#">418</a> <a href="#">419</a> |
| <a href="#">1354</a> | 532.30   | 1062.58  | 1062.57  | 6.14 | 0    | 31    | 0.0067   | 2    | K.FLALGDSGVGK.T                                                                                |

75. [MYO5A\\_HUMAN](#) Mass: 216979 Score: 322 Queries matched: 8 emPAI: 0.02

Unconventional myosin-Va OS=Homo sapiens GN=MYO5A PE=1 SV=2

| Query                | Observed | Mr(expt) | Mr(calc) | ppm  | Miss | Score | Expect   | Rank | Peptide                                                                                                                     |
|----------------------|----------|----------|----------|------|------|-------|----------|------|-----------------------------------------------------------------------------------------------------------------------------|
| <a href="#">965</a>  | 499.72   | 997.42   | 997.41   | 9.21 | 0    | 1     | 2.1      | 6    | K.EMTETMEK.K <a href="#">966</a>                                                                                            |
| <a href="#">2843</a> | 673.85   | 1345.68  | 1345.68  | 0.32 | 0    | 96    | 2.4e-009 | 1    | R.NQSIIVSGESGAGK.T <a href="#">2841</a> <a href="#">2842</a> <a href="#">2844</a> <a href="#">2845</a> <a href="#">2846</a> |

76. [PLS1\\_HUMAN](#) Mass: 36052 Score: 315 Queries matched: 9 emPAI: 0.22

Phospholipid scramblase 1 OS=Homo sapiens GN=PLSCR1 PE=1 SV=1

| Query                | Observed | Mr(expt) | Mr(calc) | ppm   | Miss | Score | Expect   | Rank | Peptide                                                                                                                                                            |
|----------------------|----------|----------|----------|-------|------|-------|----------|------|--------------------------------------------------------------------------------------------------------------------------------------------------------------------|
| <a href="#">1725</a> | 567.78   | 1133.54  | 1133.54  | -1.19 | 0    | 69    | 1e-006   | 1    | K.SLDEQCIVVGK.I <a href="#">1720</a> <a href="#">1721</a> <a href="#">1722</a> <a href="#">1724</a> <a href="#">1726</a> <a href="#">1727</a> <a href="#">1728</a> |
| <a href="#">3746</a> | 804.33   | 1606.64  | 1606.64  | 2.69  | 0    | 82    | 6.4e-009 | 1    | R.VYFAAEDTDCCTR.N                                                                                                                                                  |

77. [ACTA\\_HUMAN](#) Mass: 42381 Score: 314 Queries matched: 10 emPAI: 0.53

Actin, aortic smooth muscle OS=Homo sapiens GN=ACTA2 PE=1 SV=1

| Query                | Observed | Mr(expt) | Mr(calc) | ppm   | Miss | Score | Expect   | Rank | Peptide                                |
|----------------------|----------|----------|----------|-------|------|-------|----------|------|----------------------------------------|
| <a href="#">853</a>  | 488.73   | 975.44   | 975.44   | 2.57  | 0    | 85    | 1.6e-008 | 1    | K.AGFAGDDAPR.A <a href="#">852</a>     |
| <a href="#">1905</a> | 581.32   | 1160.62  | 1160.61  | 6.08  | 0    | 52    | 5.1e-005 | 1    | K.EITALAPSTMK.I <a href="#">1904</a>   |
| <a href="#">1989</a> | 589.31   | 1176.61  | 1176.61  | 7.62  | 0    | (44)  | 0.00036  | 1    | K.EITALAPSTMK.I <a href="#">1988</a>   |
| <a href="#">2081</a> | 599.77   | 1197.52  | 1197.51  | 1.46  | 0    | 66    | 7e-007   | 1    | K.DSYVGDEAQS.K.R                       |
| <a href="#">2883</a> | 677.82   | 1353.62  | 1353.62  | -0.18 | 1    | 66    | 1.4e-006 | 1    | K.DSYVGDEAQS.KR.G <a href="#">2882</a> |
| <a href="#">3400</a> | 750.85   | 1499.69  | 1499.70  | -8.41 | 0    | 3     | 2.7      | 3    | K.QEYDEAGPSIVHR.K                      |

Proteins matching the same set of peptides:

[ACTC\\_HUMAN](#) Mass: 42334 Score: 314 Queries matched: 10

Actin, alpha cardiac muscle 1 OS=Homo sapiens GN=ACTC1 PE=1 SV=1

[ACTS\\_HUMAN](#) Mass: 42366 Score: 314 Queries matched: 10

Actin, alpha skeletal muscle OS=Homo sapiens GN=ACTA1 PE=1 SV=1

78. [CAH4\\_HUMAN](#) Mass: 35295 Score: 310 Queries matched: 9 emPAI: 0.66

Carbonic anhydrase 4 OS=Homo sapiens GN=CA4 PE=1 SV=2

| Query                | Observed | Mr(expt) | Mr(calc) | ppm  | Miss | Score | Expect   | Rank | Peptide                                  |
|----------------------|----------|----------|----------|------|------|-------|----------|------|------------------------------------------|
| <a href="#">252</a>  | 425.19   | 848.36   | 848.36   | 1.34 | 0    | 33    | 0.00069  | 1    | K.WGGNCQK.D <a href="#">251</a>          |
| <a href="#">1353</a> | 532.29   | 1062.57  | 1062.57  | 1.00 | 0    | 35    | 0.0025   | 1    | R.EQILAFSQK.L                            |
| <a href="#">1535</a> | 550.82   | 1099.62  | 1099.62  | 0.81 | 0    | 71    | 7.9e-007 | 1    | R.QSPINIVTTK.A <a href="#">1536</a>      |
| <a href="#">3132</a> | 708.88   | 1415.74  | 1415.74  | 0.57 | 0    | 68    | 1.1e-006 | 1    | K.ASISGGGLPAPYQAK.Q <a href="#">3133</a> |
| <a href="#">3350</a> | 742.85   | 1483.69  | 1483.69  | 2.00 | 0    | 57    | 1.1e-005 | 1    | R.YLGSLLTPTCEK.V <a href="#">3351</a>    |

79. [KCRB\\_HUMAN](#) Mass: 42902 Score: 310 Queries matched: 6 emPAI: 0.52

Creatine kinase B-type OS=Homo sapiens GN=CKB PE=1 SV=1

| Query                | Observed | Mr(expt) | Mr(calc) | ppm   | Miss | Score | Expect   | Rank | Peptide                   |
|----------------------|----------|----------|----------|-------|------|-------|----------|------|---------------------------|
| <a href="#">360</a>  | 439.76   | 877.50   | 877.50   | -0.52 | 1    | 17    | 0.092    | 1    | K.FSEVLKR.L               |
| <a href="#">1133</a> | 516.28   | 1030.55  | 1030.55  | -0.25 | 0    | 60    | 9.7e-006 | 1    | K.LLIEMEQR.L              |
| <a href="#">1258</a> | 524.28   | 1046.55  | 1046.54  | 3.10  | 0    | (38)  | 0.0013   | 1    | K.LLIEMEQR.L              |
| <a href="#">3684</a> | 793.93   | 1585.84  | 1585.83  | 4.25  | 0    | 121   | 4.9e-012 | 1    | K.LAVEALSSLDGDLAGR.Y      |
| <a href="#">3887</a> | 828.92   | 1655.83  | 1655.82  | 3.97  | 0    | 87    | 1.4e-008 | 1    | R.LEQGQAIDDLMPAQK.-       |
| <a href="#">4565</a> | 982.97   | 1963.92  | 1963.92  | -1.82 | 0    | 88    | 9.1e-009 | 1    | R.GTGGVDTAAVGGVDFVSNADR.L |

80. [RAC1\\_HUMAN](#) Mass: 21835 Score: 305 Queries matched: 10 emPAI: 0.62

Ras-related C3 botulinum toxin substrate 1 OS=Homo sapiens GN=RAC1 PE=1 SV=1

| Query                | Observed | Mr(expt) | Mr(calc) | ppm   | Miss | Score | Expect   | Rank | Peptide                                                                                                                                                            |
|----------------------|----------|----------|----------|-------|------|-------|----------|------|--------------------------------------------------------------------------------------------------------------------------------------------------------------------|
| <a href="#">870</a>  | 490.78   | 979.55   | 979.55   | 2.04  | 0    | 50    | 5.1e-005 | 1    | R.AVLCPPPVK.K                                                                                                                                                      |
| <a href="#">1326</a> | 530.78   | 1059.54  | 1059.54  | -1.74 | 0    | 69    | 1.7e-006 | 1    | K.CVVVGDGAVGK.T <a href="#">1324</a> <a href="#">1325</a> <a href="#">1327</a> <a href="#">1328</a> <a href="#">1329</a> <a href="#">1330</a> <a href="#">1331</a> |
| <a href="#">2315</a> | 620.80   | 1239.59  | 1239.59  | 1.99  | 0    | 76    | 1.5e-007 | 1    | K.YLECSALTQR.G                                                                                                                                                     |

Proteins matching the same set of peptides:

[RAC3\\_HUMAN](#) Mass: 21764 Score: 305 Queries matched: 10  
 Ras-related C3 botulinum toxin substrate 3 OS=Homo sapiens GN=RAC3 PE=1 SV=1

81. [VPS28\\_HUMAN](#) Mass: 25694 Score: 305 Queries matched: 7 emPAI: 0.51  
 Vacuolar protein sorting-associated protein 28 homolog OS=Homo sapiens GN=VPS28 PE=1 SV=1

| Query                | Observed | Mr(expt) | Mr(calc) | ppm  | Miss | Score | Expect   | Rank | Peptide                                                      |
|----------------------|----------|----------|----------|------|------|-------|----------|------|--------------------------------------------------------------|
| <a href="#">105</a>  | 410.72   | 819.42   | 819.42   | 0.94 | 0    | 52    | 7.6e-005 | 1    | K.TMQALEK.A                                                  |
| <a href="#">177</a>  | 418.71   | 835.41   | 835.41   | 0.65 | 0    | (47)  | 0.00023  | 1    | K.TMQALEK.A <a href="#">175</a> <a href="#">176</a>          |
| <a href="#">3729</a> | 801.83   | 1601.65  | 1601.65  | 0.60 | 0    | 95    | 3.3e-010 | 1    | K.DCVSPSEYTAACSR.L <a href="#">3727</a> <a href="#">3728</a> |

82. [TPIS\\_HUMAN](#) Mass: 31057 Score: 302 Queries matched: 5 emPAI: 0.26  
 Triosephosphate isomerase OS=Homo sapiens GN=TP11 PE=1 SV=3

| Query                | Observed | Mr(expt) | Mr(calc) | ppm   | Miss | Score | Expect   | Rank | Peptide                                                    |
|----------------------|----------|----------|----------|-------|------|-------|----------|------|------------------------------------------------------------|
| <a href="#">2275</a> | 617.80   | 1233.59  | 1233.59  | -1.28 | 0    | 97    | 1.5e-009 | 1    | K.SNVSDAVAQSTR.I <a href="#">2273</a> <a href="#">2274</a> |
| <a href="#">2747</a> | 663.84   | 1325.67  | 1325.66  | 4.19  | 0    | 79    | 9.6e-008 | 1    | R.IIYGGSVTGATCK.E                                          |
| <a href="#">3293</a> | 489.58   | 1465.72  | 1465.72  | 0.00  | 0    | 17    | 0.16     | 1    | K.TATPQQAQEVHEK.L                                          |

83. [NIBAN\\_HUMAN](#) Mass: 104039 Score: 297 Queries matched: 7 emPAI: 0.15  
 Protein Niban OS=Homo sapiens GN=FAM129A PE=1 SV=1

| Query                | Observed | Mr(expt) | Mr(calc) | ppm   | Miss | Score | Expect   | Rank | Peptide                                                    |
|----------------------|----------|----------|----------|-------|------|-------|----------|------|------------------------------------------------------------|
| <a href="#">422</a>  | 445.22   | 888.43   | 888.43   | 1.98  | 0    | 36    | 0.0019   | 1    | R.TEVEQQR.D                                                |
| <a href="#">768</a>  | 480.74   | 959.47   | 959.47   | -2.81 | 0    | 33    | 0.0047   | 1    | K.AMVQAPEK.S                                               |
| <a href="#">1845</a> | 576.76   | 1151.51  | 1151.51  | -0.26 | 0    | 59    | 5.4e-006 | 1    | R.SDMQIVNSK.N <a href="#">1844</a>                         |
| <a href="#">3456</a> | 762.37   | 1522.72  | 1522.73  | -3.24 | 0    | 100   | 6.2e-010 | 1    | K.EVNEVSQNFQTK.D <a href="#">3457</a> <a href="#">3458</a> |

84. [TS101\\_HUMAN](#) Mass: 44088 Score: 296 Queries matched: 13 emPAI: 0.63  
 Tumor susceptibility gene 101 protein OS=Homo sapiens GN=TSG101 PE=1 SV=2

| Query                | Observed | Mr(expt) | Mr(calc) | ppm   | Miss | Score | Expect   | Rank | Peptide                                                                                                                |
|----------------------|----------|----------|----------|-------|------|-------|----------|------|------------------------------------------------------------------------------------------------------------------------|
| <a href="#">443</a>  | 447.22   | 892.43   | 892.43   | -3.62 | 0    | 31    | 0.0067   | 1    | K.LEEMVTR.L <a href="#">442</a> <a href="#">446</a>                                                                    |
| <a href="#">812</a>  | 484.26   | 966.50   | 966.50   | 0.54  | 1    | 56    | 1.7e-005 | 1    | R.KTAGLSLDLY.-                                                                                                         |
| <a href="#">926</a>  | 495.78   | 989.54   | 989.54   | -1.82 | 0    | 38    | 0.0017   | 1    | R.ASLISAVSDK.L                                                                                                         |
| <a href="#">1574</a> | 553.77   | 1105.53  | 1105.53  | 1.54  | 0    | 61    | 7.5e-006 | 1    | R.DGTISEDTR.A <a href="#">1569</a> <a href="#">1570</a> <a href="#">1571</a> <a href="#">1572</a> <a href="#">1573</a> |
| <a href="#">1598</a> | 557.32   | 1112.63  | 1112.63  | 1.49  | 1    | 52    | 2.7e-005 | 1    | R.AQAEINLAKR.T                                                                                                         |
| <a href="#">2003</a> | 590.34   | 1178.66  | 1178.65  | 2.04  | 0    | 40    | 0.00038  | 1    | R.ETVNVITLYK.D                                                                                                         |

85. [RS27A\\_HUMAN](#) Mass: 18296 Score: 296 Queries matched: 14 emPAI: 1.60  
 Ubiquitin-40S ribosomal protein S27a OS=Homo sapiens GN=RPS27A PE=1 SV=2

| Query                | Observed | Mr(expt) | Mr(calc) | ppm   | Miss | Score | Expect   | Rank | Peptide                                                                                                                                                          |
|----------------------|----------|----------|----------|-------|------|-------|----------|------|------------------------------------------------------------------------------------------------------------------------------------------------------------------|
| <a href="#">1195</a> | 520.26   | 1038.51  | 1038.51  | 0.08  | 0    | 36    | 0.002    | 1    | K.EGIPPDQQR.L <a href="#">1188</a> <a href="#">1189</a> <a href="#">1191</a> <a href="#">1192</a> <a href="#">1193</a> <a href="#">1194</a> <a href="#">1196</a> |
| <a href="#">1379</a> | 534.32   | 1066.62  | 1066.61  | 5.17  | 0    | 62    | 2.5e-006 | 1    | K.ESTLHLVLR.L                                                                                                                                                    |
| <a href="#">3459</a> | 762.39   | 1522.77  | 1522.77  | -4.45 | 1    | 90    | 6.6e-009 | 1    | K.IQDKREGIPPDQQR.L <a href="#">3461</a> <a href="#">3462</a>                                                                                                     |
| <a href="#">4266</a> | 894.47   | 1786.93  | 1786.92  | 8.34  | 0    | 70    | 6.5e-007 | 1    | K.TITLEVEPSDTIENVK.A                                                                                                                                             |
| <a href="#">4611</a> | 663.03   | 1986.07  | 1986.05  | 8.52  | 1    | 2     | 2.2      | 1    | K.TITLEVEPSDTIENVKAK.I                                                                                                                                           |

## Proteins matching the same set of peptides:

[RL40\\_HUMAN](#) Mass: 15004 Score: 296 Queries matched: 14  
 Ubiquitin-60S ribosomal protein L40 OS=Homo sapiens GN=UBA52 PE=1 SV=2

[UBB\\_HUMAN](#) Mass: 25803 Score: 296 Queries matched: 14  
 Polyubiquitin-B OS=Homo sapiens GN=UBB PE=1 SV=1

[UBC\\_HUMAN](#) Mass: 76992 Score: 296 Queries matched: 14  
 Polyubiquitin-C OS=Homo sapiens GN=UBC PE=1 SV=3

86. [KPCD\\_HUMAN](#) Mass: 78652 Score: 295 Queries matched: 6 emPAI: 0.05  
 Protein kinase C delta type OS=Homo sapiens GN=PRKCD PE=1 SV=2



| Query                                                                               | Observed                    | Mr(expt)     | Mr(calc)   | ppm                 | Miss        | Score | Expect   | Rank | Peptide                                                                                                                 |
|-------------------------------------------------------------------------------------|-----------------------------|--------------|------------|---------------------|-------------|-------|----------|------|-------------------------------------------------------------------------------------------------------------------------|
| <a href="#">736</a>                                                                 | 476.23                      | 950.45       | 950.45     | 2.22                | 0           | 15    | 0.21     | 2    | K.ENIFGESR.A <a href="#">735</a>                                                                                        |
| <a href="#">4098</a>                                                                | 865.38                      | 1728.74      | 1728.73    | 6.04                | 0           | 90    | 1.3e-009 | 1    | K.TGVAGEDMQDNSGTYGK.I <a href="#">4095</a> <a href="#">4096</a> <a href="#">4097</a>                                    |
| <hr/>                                                                               |                             |              |            |                     |             |       |          |      |                                                                                                                         |
| 87.                                                                                 | <a href="#">NDRG1_HUMAN</a> | Mass: 43264  | Score: 294 | Queries matched: 5  | emPAI: 0.18 |       |          |      |                                                                                                                         |
| Protein NDRG1 OS=Homo sapiens GN=NDRG1 PE=1 SV=1                                    |                             |              |            |                     |             |       |          |      |                                                                                                                         |
| Query                                                                               | Observed                    | Mr(expt)     | Mr(calc)   | ppm                 | Miss        | Score | Expect   | Rank | Peptide                                                                                                                 |
| <a href="#">2801</a>                                                                | 669.83                      | 1337.64      | 1337.64    | -2.73               | 0           | 105   | 2.4e-010 | 1    | R.TASGSSVTSLDGTR.S <a href="#">2800</a> <a href="#">2802</a> <a href="#">2803</a>                                       |
| <a href="#">3693</a>                                                                | 794.88                      | 1587.74      | 1587.74    | 2.07                | 0           | 67    | 9.8e-007 | 1    | K.MADCGGLPQISQPAK.L                                                                                                     |
| <hr/>                                                                               |                             |              |            |                     |             |       |          |      |                                                                                                                         |
| 88.                                                                                 | <a href="#">VP37C_HUMAN</a> | Mass: 38692  | Score: 292 | Queries matched: 9  | emPAI: 0.20 |       |          |      |                                                                                                                         |
| Vacuolar protein sorting-associated protein 37C OS=Homo sapiens GN=VPS37C PE=1 SV=2 |                             |              |            |                     |             |       |          |      |                                                                                                                         |
| Query                                                                               | Observed                    | Mr(expt)     | Mr(calc)   | ppm                 | Miss        | Score | Expect   | Rank | Peptide                                                                                                                 |
| <a href="#">596</a>                                                                 | 461.23                      | 920.44       | 920.44     | -1.09               | 0           | 18    | 0.12     | 1    | R.EMALATNR.S <a href="#">595</a>                                                                                        |
| <a href="#">2519</a>                                                                | 641.28                      | 1280.55      | 1280.54    | 0.67                | 0           | 77    | 2.3e-008 | 1    | K.IEEESEAMA EK.F <a href="#">2516</a> <a href="#">2517</a> <a href="#">2518</a>                                         |
| <a href="#">3088</a>                                                                | 701.88                      | 1401.74      | 1401.73    | 8.62                | 0           | 71    | 6.4e-007 | 1    | R.NLEFQGPL EISR.S <a href="#">3086</a> <a href="#">3087</a>                                                             |
| <hr/>                                                                               |                             |              |            |                     |             |       |          |      |                                                                                                                         |
| 89.                                                                                 | <a href="#">APOC3_HUMAN</a> | Mass: 10846  | Score: 288 | Queries matched: 4  | emPAI: 0.87 |       |          |      |                                                                                                                         |
| Apolipoprotein C-III OS=Homo sapiens GN=APOC3 PE=1 SV=1                             |                             |              |            |                     |             |       |          |      |                                                                                                                         |
| Query                                                                               | Observed                    | Mr(expt)     | Mr(calc)   | ppm                 | Miss        | Score | Expect   | Rank | Peptide                                                                                                                 |
| <a href="#">4056</a>                                                                | 858.93                      | 1715.84      | 1715.84    | -0.84               | 0           | 115   | 2.7e-011 | 1    | K.DALSSVQESQVAQQAR.G <a href="#">4057</a> <a href="#">4058</a> <a href="#">4059</a>                                     |
| <hr/>                                                                               |                             |              |            |                     |             |       |          |      |                                                                                                                         |
| 90.                                                                                 | <a href="#">AT11B_HUMAN</a> | Mass: 135415 | Score: 288 | Queries matched: 7  | emPAI: 0.03 |       |          |      |                                                                                                                         |
| Probable phospholipid-transporting ATPase IF OS=Homo sapiens GN=ATP11B PE=1 SV=2    |                             |              |            |                     |             |       |          |      |                                                                                                                         |
| Query                                                                               | Observed                    | Mr(expt)     | Mr(calc)   | ppm                 | Miss        | Score | Expect   | Rank | Peptide                                                                                                                 |
| <a href="#">96</a>                                                                  | 409.25                      | 816.48       | 816.48     | 0.46                | 1           | 3     | 2.3      | 10   | R.NSSKILR.F                                                                                                             |
| <a href="#">2062</a>                                                                | 597.75                      | 1193.49      | 1193.50    | -5.30               | 0           | 67    | 2.6e-007 | 1    | K.SDSECAEQLR.Q <a href="#">2063</a> <a href="#">2064</a> <a href="#">2065</a> <a href="#">2066</a> <a href="#">2067</a> |
| <hr/>                                                                               |                             |              |            |                     |             |       |          |      |                                                                                                                         |
| 91.                                                                                 | <a href="#">PRDX6_HUMAN</a> | Mass: 25133  | Score: 284 | Queries matched: 7  | emPAI: 0.33 |       |          |      |                                                                                                                         |
| Peroxiredoxin-6 OS=Homo sapiens GN=PRDX6 PE=1 SV=3                                  |                             |              |            |                     |             |       |          |      |                                                                                                                         |
| Query                                                                               | Observed                    | Mr(expt)     | Mr(calc)   | ppm                 | Miss        | Score | Expect   | Rank | Peptide                                                                                                                 |
| <a href="#">580</a>                                                                 | 458.25                      | 914.48       | 914.49     | -3.53               | 0           | 5     | 2.1      | 3    | R.VATPVDWK.D <a href="#">579</a>                                                                                        |
| <a href="#">3052</a>                                                                | 698.33                      | 1394.65      | 1394.65    | 2.95                | 0           | 85    | 1.7e-008 | 1    | R.DFTPVCTTELGR.A                                                                                                        |
| <a href="#">3657</a>                                                                | 791.84                      | 1581.66      | 1581.66    | -3.13               | 0           | 84    | 5.1e-009 | 1    | K.DINAYNCEPTEK.L <a href="#">3655</a> <a href="#">3656</a> <a href="#">3658</a>                                         |
| <hr/>                                                                               |                             |              |            |                     |             |       |          |      |                                                                                                                         |
| 92.                                                                                 | <a href="#">1433G_HUMAN</a> | Mass: 28456  | Score: 284 | Queries matched: 9  | emPAI: 0.65 |       |          |      |                                                                                                                         |
| 14-3-3 protein gamma OS=Homo sapiens GN=YWHAG PE=1 SV=2                             |                             |              |            |                     |             |       |          |      |                                                                                                                         |
| Query                                                                               | Observed                    | Mr(expt)     | Mr(calc)   | ppm                 | Miss        | Score | Expect   | Rank | Peptide                                                                                                                 |
| <a href="#">86</a>                                                                  | 408.71                      | 815.41       | 815.41     | 0.04                | 0           | 56    | 1.8e-005 | 1    | R.LAEQAER.Y <a href="#">83</a> <a href="#">84</a> <a href="#">85</a>                                                    |
| <a href="#">498</a>                                                                 | 452.26                      | 902.51       | 902.51     | 0.50                | 0           | 49    | 0.00011  | 1    | R.VISSIEQK.T <a href="#">499</a>                                                                                        |
| <a href="#">538</a>                                                                 | 454.27                      | 906.53       | 906.52     | 8.47                | 0           | 37    | 0.0012   | 1    | R.NLLSVAYK.N                                                                                                            |
| <a href="#">2335</a>                                                                | 623.26                      | 1244.50      | 1244.50    | 0.38                | 0           | 56    | 2.4e-006 | 1    | K.NCSETQYESK.V <a href="#">2336</a>                                                                                     |
| <hr/>                                                                               |                             |              |            |                     |             |       |          |      |                                                                                                                         |
| 93.                                                                                 | <a href="#">YBOX1_HUMAN</a> | Mass: 35903  | Score: 274 | Queries matched: 4  | emPAI: 0.10 |       |          |      |                                                                                                                         |
| Nuclease-sensitive element-binding protein 1 OS=Homo sapiens GN=YBX1 PE=1 SV=3      |                             |              |            |                     |             |       |          |      |                                                                                                                         |
| Query                                                                               | Observed                    | Mr(expt)     | Mr(calc)   | ppm                 | Miss        | Score | Expect   | Rank | Peptide                                                                                                                 |
| <a href="#">3991</a>                                                                | 848.44                      | 1694.86      | 1694.86    | 1.13                | 0           | 104   | 2.9e-010 | 1    | K.GAEANVTGPGGVPVQGSK.Y <a href="#">3988</a> <a href="#">3989</a> <a href="#">3990</a>                                   |
| <hr/>                                                                               |                             |              |            |                     |             |       |          |      |                                                                                                                         |
| 94.                                                                                 | <a href="#">DHSO_HUMAN</a>  | Mass: 38927  | Score: 272 | Queries matched: 13 | emPAI: 0.74 |       |          |      |                                                                                                                         |
| Sorbitol dehydrogenase OS=Homo sapiens GN=SORD PE=1 SV=4                            |                             |              |            |                     |             |       |          |      |                                                                                                                         |
| Query                                                                               | Observed                    | Mr(expt)     | Mr(calc)   | ppm                 | Miss        | Score | Expect   | Rank | Peptide                                                                                                                 |

|                      |        |         |         |       |   |    |          |   |                                                                          |
|----------------------|--------|---------|---------|-------|---|----|----------|---|--------------------------------------------------------------------------|
| <a href="#">110</a>  | 411.73 | 821.45  | 821.45  | 4.69  | 0 | 35 | 0.0014   | 1 | K.HLKPGR.V                                                               |
| <a href="#">548</a>  | 455.26 | 908.51  | 908.51  | 0.90  | 0 | 55 | 1.2e-005 | 1 | R.VAIEPGAPR.E <a href="#">549</a>                                        |
| <a href="#">636</a>  | 465.24 | 928.46  | 928.46  | -1.69 | 0 | 62 | 3.5e-006 | 1 | K.ESPQEIAR.K <a href="#">633</a> <a href="#">635</a> <a href="#">637</a> |
| <a href="#">701</a>  | 471.19 | 940.36  | 940.36  | -0.82 | 0 | 30 | 0.001    | 1 | R.ENDEFCK.M <a href="#">699</a> <a href="#">700</a>                      |
| <a href="#">3700</a> | 795.42 | 1588.83 | 1588.82 | 2.24  | 0 | 56 | 1.7e-005 | 1 | K.AMGAAQVVVTDLSATR.L                                                     |
| <a href="#">4371</a> | 611.29 | 1830.86 | 1830.86 | 0.33  | 1 | 18 | 0.068    | 1 | R.VAIEPGAPRENDEFCK.M                                                     |
| <a href="#">4529</a> | 975.52 | 1949.03 | 1949.03 | 0.54  | 0 | 70 | 4.9e-007 | 1 | R.LENYPIPEPGPNEVLLR.M                                                    |

95. [CD63\\_HUMAN](#) Mass: 26474 Score: 265 Queries matched: 14 emPAI: 0.71

CD63 antigen OS=Homo sapiens GN=CD63 PE=1 SV=2

| Query                | Observed | Mr(expt) | Mr(calc) | ppm   | Miss | Score | Expect   | Rank | Peptide                                                                                          |
|----------------------|----------|----------|----------|-------|------|-------|----------|------|--------------------------------------------------------------------------------------------------|
| <a href="#">656</a>  | 466.76   | 931.50   | 931.49   | 8.69  | 1    | 3     | 4.5      | 6    | K.IPSMSKNR.V <a href="#">651</a> <a href="#">655</a>                                             |
| <a href="#">1177</a> | 519.24   | 1036.46  | 1036.46  | -2.76 | 0    | 42    | 0.00019  | 1    | R.QQMENYPK.N <a href="#">1176</a> <a href="#">1178</a> <a href="#">1179</a> <a href="#">1180</a> |
| <a href="#">1293</a> | 527.24   | 1052.46  | 1052.46  | -0.68 | 0    | (36)  | 0.00088  | 1    | R.QQMENYPK.N <a href="#">1291</a> <a href="#">1292</a>                                           |
| <a href="#">2411</a> | 629.29   | 1256.56  | 1256.56  | 3.28  | 0    | 72    | 2.6e-007 | 1    | K.VMSEFNNFR.Q                                                                                    |
| <a href="#">2489</a> | 637.28   | 1272.55  | 1272.56  | -1.69 | 0    | (61)  | 1.8e-006 | 1    | K.VMSEFNNFR.Q <a href="#">2490</a>                                                               |

96. [LDHC\\_HUMAN](#) Mass: 36630 Score: 264 Queries matched: 8 emPAI: 0.22

L-lactate dehydrogenase C chain OS=Homo sapiens GN=LDHC PE=1 SV=4

| Query                | Observed | Mr(expt) | Mr(calc) | ppm   | Miss | Score | Expect   | Rank | Peptide                                                    |
|----------------------|----------|----------|----------|-------|------|-------|----------|------|------------------------------------------------------------|
| <a href="#">215</a>  | 421.76   | 841.50   | 841.50   | 1.55  | 0    | 3     | 2.2      | 5    | K.ISGLPVTR.V                                               |
| <a href="#">967</a>  | 499.73   | 997.45   | 997.45   | 5.05  | 0    | 8     | 0.62     | 1    | K.DYSVSANSR.I                                              |
| <a href="#">2354</a> | 624.81   | 1247.60  | 1247.59  | 5.12  | 0    | 68    | 1.1e-006 | 1    | R.VIGSGCNLDSAR.F <a href="#">2352</a> <a href="#">2353</a> |
| <a href="#">2859</a> | 675.79   | 1349.57  | 1349.58  | -3.72 | 0    | 90    | 1.4e-009 | 1    | K.LIEDDENSQCK.I <a href="#">2858</a> <a href="#">2860</a>  |

97. [ENTP3\\_HUMAN](#) Mass: 59809 Score: 263 Queries matched: 6 emPAI: 0.06

Ectonucleoside triphosphate diphosphohydrolase 3 OS=Homo sapiens GN=ENTPD3 PE=1 SV=2

| Query                | Observed | Mr(expt) | Mr(calc) | ppm   | Miss | Score | Expect   | Rank | Peptide                                                                                                                       |
|----------------------|----------|----------|----------|-------|------|-------|----------|------|-------------------------------------------------------------------------------------------------------------------------------|
| <a href="#">3864</a> | 824.39   | 1646.76  | 1646.76  | -1.03 | 0    | 72    | 3.7e-007 | 1    | K.GSGISSYGNNPQDVPR.A <a href="#">3863</a> <a href="#">3865</a> <a href="#">3866</a> <a href="#">3867</a> <a href="#">3868</a> |

98. [K1324\\_HUMAN](#) Mass: 114445 Score: 262 Queries matched: 4 emPAI: 0.03

UPF0577 protein KIAA1324 OS=Homo sapiens GN=KIAA1324 PE=2 SV=2

| Query                | Observed | Mr(expt) | Mr(calc) | ppm  | Miss | Score | Expect   | Rank | Peptide                                                                         |
|----------------------|----------|----------|----------|------|------|-------|----------|------|---------------------------------------------------------------------------------|
| <a href="#">2619</a> | 649.28   | 1296.54  | 1296.54  | 2.84 | 0    | 91    | 8.8e-010 | 1    | R.SNDVTQSCSSGR.S <a href="#">2617</a> <a href="#">2618</a> <a href="#">2620</a> |

99. [GPR64\\_HUMAN](#) Mass: 113232 Score: 258 Queries matched: 8 emPAI: 0.10

G-protein coupled receptor 64 OS=Homo sapiens GN=GPR64 PE=1 SV=2

| Query                | Observed | Mr(expt) | Mr(calc) | ppm   | Miss | Score | Expect   | Rank | Peptide                                                                                                                  |
|----------------------|----------|----------|----------|-------|------|-------|----------|------|--------------------------------------------------------------------------------------------------------------------------|
| <a href="#">5</a>    | 400.67   | 799.33   | 799.34   | -2.61 | 0    | 22    | 0.0062   | 1    | R.YLCCGK.L                                                                                                               |
| <a href="#">160</a>  | 416.73   | 831.45   | 831.45   | 1.42  | 0    | 47    | 0.00026  | 1    | K.TSIQDLR.S                                                                                                              |
| <a href="#">1933</a> | 583.75   | 1165.49  | 1165.48  | 7.78  | 0    | 55    | 5.2e-006 | 1    | R.GGWSDNQCSVK.D <a href="#">1925</a> <a href="#">1927</a> <a href="#">1928</a> <a href="#">1931</a> <a href="#">1932</a> |

100. [CAPG\\_HUMAN](#) Mass: 38760 Score: 257 Queries matched: 4 emPAI: 0.10

Macrophage-capping protein OS=Homo sapiens GN=CAPG PE=1 SV=2

| Query                | Observed | Mr(expt) | Mr(calc) | ppm   | Miss | Score | Expect   | Rank | Peptide                                                                         |
|----------------------|----------|----------|----------|-------|------|-------|----------|------|---------------------------------------------------------------------------------|
| <a href="#">2444</a> | 632.81   | 1263.61  | 1263.61  | -1.17 | 0    | 102   | 4.4e-010 | 1    | K.VSDATQMNLT.K.V <a href="#">2443</a> <a href="#">2445</a> <a href="#">2446</a> |

101. [PPAP\\_HUMAN](#) Mass: 44880 Score: 251 Queries matched: 16 emPAI: 0.75

Prostatic acid phosphatase OS=Homo sapiens GN=ACPP PE=1 SV=3

| Query               | Observed | Mr(expt) | Mr(calc) | ppm   | Miss | Score | Expect  | Rank | Peptide                                                                                                                              |
|---------------------|----------|----------|----------|-------|------|-------|---------|------|--------------------------------------------------------------------------------------------------------------------------------------|
| <a href="#">373</a> | 441.27   | 880.52   | 880.52   | 2.12  | 0    | 32    | 0.002   | 1    | K.FVTLVFR.H                                                                                                                          |
| <a href="#">528</a> | 454.25   | 906.48   | 906.48   | -2.97 | 0    | 47    | 0.00014 | 1    | R.ATQIPSYK.K <a href="#">530</a> <a href="#">531</a> <a href="#">532</a> <a href="#">533</a> <a href="#">534</a> <a href="#">536</a> |

|                      |        |         |         |      |   |    |          |   |                                          |
|----------------------|--------|---------|---------|------|---|----|----------|---|------------------------------------------|
| <a href="#">714</a>  | 472.75 | 943.49  | 943.49  | 6.57 | 0 | 31 | 0.007    | 1 | K.HEQVYIR.S                              |
| <a href="#">1173</a> | 518.30 | 1034.58 | 1034.58 | 4.84 | 1 | 40 | 0.00049  | 1 | R.ATQIPSYKK.L <a href="#">1172</a>       |
| <a href="#">2210</a> | 612.31 | 1222.61 | 1222.61 | 1.41 | 0 | 54 | 4.1e-005 | 1 | R.FQLESETLK.S <a href="#">2211</a>       |
| <a href="#">2770</a> | 665.85 | 1329.68 | 1329.68 | 1.72 | 0 | 35 | 0.0027   | 1 | R.SPIDTFPTDPIK.E                         |
| <a href="#">4570</a> | 657.99 | 1970.95 | 1970.95 | 3.79 | 1 | 36 | 0.0013   | 1 | R.FQLESETLKSEEFQK.R <a href="#">4569</a> |

102. [5NTD\\_HUMAN](#) Mass: 63898 Score: 251 Queries matched: 7 emPAI: 0.18

5'-nucleotidase OS=Homo sapiens GN=NT5E PE=1 SV=1

| Query                | Observed | Mr(expt) | Mr(calc) | ppm   | Miss | Score | Expect   | Rank | Peptide                                                                       |
|----------------------|----------|----------|----------|-------|------|-------|----------|------|-------------------------------------------------------------------------------|
| <a href="#">248</a>  | 424.73   | 847.44   | 847.45   | -6.39 | 0    | 21    | 0.08     | 1    | K.LDVLCCK.C                                                                   |
| <a href="#">1650</a> | 562.26   | 1122.50  | 1122.50  | 0.73  | 0    | 53    | 2e-005   | 1    | R.LEQTSSESSK.C <a href="#">1648</a> <a href="#">1649</a> <a href="#">1651</a> |
| <a href="#">3354</a> | 743.36   | 1484.70  | 1484.69  | 4.04  | 0    | 92    | 3.5e-009 | 1    | K.TIVYLDGSSQSCR.F                                                             |
| <a href="#">4104</a> | 866.48   | 1730.94  | 1730.95  | -0.89 | 0    | 65    | 1.6e-006 | 1    | K.VLPVGVDEVVIGVYTSK.E                                                         |

103. [LDHB\\_HUMAN](#) Mass: 36900 Score: 242 Queries matched: 7 emPAI: 0.47

L-lactate dehydrogenase B chain OS=Homo sapiens GN=LDHB PE=1 SV=2

| Query                | Observed | Mr(expt) | Mr(calc) | ppm   | Miss | Score | Expect   | Rank | Peptide                                                    |
|----------------------|----------|----------|----------|-------|------|-------|----------|------|------------------------------------------------------------|
| <a href="#">766</a>  | 480.28   | 958.55   | 958.54   | 2.77  | 0    | 32    | 0.0067   | 1    | R.GLTSVINQK.L                                              |
| <a href="#">1985</a> | 588.80   | 1175.58  | 1175.58  | -2.07 | 0    | 35    | 0.003    | 1    | K.SADTLWDIQK.D                                             |
| <a href="#">2354</a> | 624.81   | 1247.60  | 1247.59  | 5.12  | 0    | 68    | 1.1e-006 | 1    | R.VIGSGCNLDSAR.F <a href="#">2352</a> <a href="#">2353</a> |
| <a href="#">3981</a> | 847.95   | 1693.89  | 1693.89  | 2.25  | 0    | 89    | 5.7e-009 | 1    | K.LIAPVAEEATVPNNK.I <a href="#">3980</a>                   |

104. [1433B\\_HUMAN](#) Mass: 28179 Score: 241 Queries matched: 8 emPAI: 0.66

14-3-3 protein beta/alpha OS=Homo sapiens GN=YWHAB PE=1 SV=3

| Query                | Observed | Mr(expt) | Mr(calc) | ppm   | Miss | Score | Expect   | Rank | Peptide                                                              |
|----------------------|----------|----------|----------|-------|------|-------|----------|------|----------------------------------------------------------------------|
| <a href="#">86</a>   | 408.71   | 815.41   | 815.41   | 0.04  | 0    | 56    | 1.8e-005 | 1    | K.LAEQAER.Y <a href="#">83</a> <a href="#">84</a> <a href="#">85</a> |
| <a href="#">498</a>  | 452.26   | 902.51   | 902.51   | 0.50  | 0    | 49    | 0.00011  | 1    | R.VISSIEQK.T <a href="#">499</a>                                     |
| <a href="#">538</a>  | 454.27   | 906.53   | 906.52   | 8.47  | 0    | 37    | 0.0012   | 1    | R.NLLSVAYK.N                                                         |
| <a href="#">2011</a> | 591.78   | 1181.55  | 1181.56  | -5.10 | 0    | 54    | 2.6e-005 | 1    | R.YLSEVASGDNK.Q                                                      |

105. [RAB3D\\_HUMAN](#) Mass: 24480 Score: 237 Queries matched: 7 emPAI: 0.78

Ras-related protein Rab-3D OS=Homo sapiens GN=RAB3D PE=1 SV=1

| Query                | Observed | Mr(expt) | Mr(calc) | ppm   | Miss | Score | Expect   | Rank | Peptide                              |
|----------------------|----------|----------|----------|-------|------|-------|----------|------|--------------------------------------|
| <a href="#">209</a>  | 421.72   | 841.43   | 841.43   | -3.58 | 0    | 4     | 2.3      | 1    | R.VVPAEDGR.R                         |
| <a href="#">672</a>  | 468.69   | 935.36   | 935.37   | -1.23 | 0    | 56    | 2.7e-006 | 1    | K.CDLEDER.V                          |
| <a href="#">848</a>  | 488.26   | 974.51   | 974.51   | 0.68  | 0    | 53    | 5e-005   | 1    | R.LVDVICEK.M <a href="#">849</a>     |
| <a href="#">1538</a> | 550.84   | 1099.66  | 1099.66  | 3.69  | 0    | 68    | 5.1e-007 | 1    | K.LLLIGNSSVGK.T <a href="#">1537</a> |
| <a href="#">2701</a> | 658.83   | 1315.65  | 1315.65  | 1.50  | 0    | 74    | 3.2e-007 | 1    | K.LQIWDTAGQER.Y                      |

106. [CYFP1\\_HUMAN](#) Mass: 146742 Score: 235 Queries matched: 5 emPAI: 0.03

Cytoplasmic FMR1-interacting protein 1 OS=Homo sapiens GN=CYFIP1 PE=1 SV=1

| Query                | Observed | Mr(expt) | Mr(calc) | ppm   | Miss | Score | Expect   | Rank | Peptide                                                                                              |
|----------------------|----------|----------|----------|-------|------|-------|----------|------|------------------------------------------------------------------------------------------------------|
| <a href="#">2408</a> | 628.30   | 1254.58  | 1254.58  | -2.11 | 0    | 113   | 2.6e-011 | 1    | R.YSNSEVVTGSGR.Q <a href="#">2404</a> <a href="#">2405</a> <a href="#">2406</a> <a href="#">2409</a> |

107. [DDAH2\\_HUMAN](#) Mass: 29911 Score: 233 Queries matched: 8 emPAI: 0.27

N(G),N(G)-dimethylarginine dimethylaminohydrolase 2 OS=Homo sapiens GN=DDAH2 PE=1 SV=1

| Query                | Observed | Mr(expt) | Mr(calc) | ppm   | Miss | Score | Expect   | Rank | Peptide                                                    |
|----------------------|----------|----------|----------|-------|------|-------|----------|------|------------------------------------------------------------|
| <a href="#">842</a>  | 487.74   | 973.46   | 973.47   | -2.69 | 0    | 6     | 1.7      | 4    | -.MGTPGGLGR.C <a href="#">843</a>                          |
| <a href="#">1718</a> | 567.30   | 1132.58  | 1132.57  | 3.72  | 0    | 73    | 5.5e-007 | 1    | R.TVVAGSSDAAQK.A <a href="#">1717</a> <a href="#">1719</a> |
| <a href="#">1840</a> | 576.31   | 1150.61  | 1150.62  | -7.32 | 1    | 1     | 5.6      | 8    | K.AQREHGVLGGK.L                                            |
| <a href="#">3117</a> | 707.35   | 1412.68  | 1412.69  | -4.50 | 0    | 68    | 9.9e-007 | 1    | R.GGGDLPNSQEAQK.L <a href="#">3118</a>                     |

|                                                                                        |                             |              |            |                     |             |       |          |      |                                                                                                                                              |
|----------------------------------------------------------------------------------------|-----------------------------|--------------|------------|---------------------|-------------|-------|----------|------|----------------------------------------------------------------------------------------------------------------------------------------------|
| 108.                                                                                   | <a href="#">GNA13_HUMAN</a> | Mass: 44364  | Score: 232 | Queries matched: 6  | emPAI: 0.27 |       |          |      |                                                                                                                                              |
| Guanine nucleotide-binding protein subunit alpha-13 OS=Homo sapiens GN=GNA13 PE=1 SV=2 |                             |              |            |                     |             |       |          |      |                                                                                                                                              |
| Query                                                                                  | Observed                    | Mr(expt)     | Mr(calc)   | ppm                 | Miss        | Score | Expect   | Rank | Peptide                                                                                                                                      |
| <a href="#">356</a>                                                                    | 439.21                      | 876.41       | 876.41     | -1.58               | 0           | 51    | 6.6e-005 | 1    | K.MVDVGGQR.S <a href="#">355</a>                                                                                                             |
| <a href="#">1316</a>                                                                   | 529.32                      | 1056.62      | 1056.62    | 0.47                | 0           | 73    | 2.5e-007 | 1    | K.LLLLGAGESGK.S <a href="#">1317</a>                                                                                                         |
| <a href="#">2503</a>                                                                   | 639.31                      | 1276.60      | 1276.59    | 4.44                | 0           | 50    | 6.2e-005 | 1    | R.APMAAQGMVETR.V <a href="#">2502</a>                                                                                                        |
| 109.                                                                                   | <a href="#">GGT1_HUMAN</a>  | Mass: 61714  | Score: 229 | Queries matched: 9  | emPAI: 0.34 |       |          |      |                                                                                                                                              |
| Gamma-glutamyltranspeptidase 1 OS=Homo sapiens GN=GGT1 PE=1 SV=2                       |                             |              |            |                     |             |       |          |      |                                                                                                                                              |
| Query                                                                                  | Observed                    | Mr(expt)     | Mr(calc)   | ppm                 | Miss        | Score | Expect   | Rank | Peptide                                                                                                                                      |
| <a href="#">1147</a>                                                                   | 516.75                      | 1031.48      | 1031.48    | 0.29                | 0           | 40    | 0.00053  | 1    | R.ESVESPEQK.G <a href="#">1144</a> <a href="#">1145</a> <a href="#">1146</a>                                                                 |
| <a href="#">1210</a>                                                                   | 521.81                      | 1041.60      | 1041.59    | 4.28                | 1           | 45    | 0.00023  | 1    | K.GLAAALENKR.T                                                                                                                               |
| <a href="#">1354</a>                                                                   | 532.30                      | 1062.58      | 1062.57    | 6.12                | 0           | 40    | 0.00085  | 1    | K.FVDVTEVVR.N                                                                                                                                |
| <a href="#">1864</a>                                                                   | 577.83                      | 1153.65      | 1153.65    | 1.55                | 0           | 42    | 0.00029  | 1    | K.GGLSVAVPGEIR.G                                                                                                                             |
| <a href="#">1970</a>                                                                   | 586.85                      | 1171.68      | 1171.67    | 6.28                | 0           | 74    | 1.9e-007 | 1    | R.LFQPSIQLAR.Q <a href="#">1969</a>                                                                                                          |
| 110.                                                                                   | <a href="#">TSN7_HUMAN</a>  | Mass: 28183  | Score: 225 | Queries matched: 3  | emPAI: 0.13 |       |          |      |                                                                                                                                              |
| Tetraspanin-7 OS=Homo sapiens GN=TSPAN7 PE=1 SV=2                                      |                             |              |            |                     |             |       |          |      |                                                                                                                                              |
| Query                                                                                  | Observed                    | Mr(expt)     | Mr(calc)   | ppm                 | Miss        | Score | Expect   | Rank | Peptide                                                                                                                                      |
| <a href="#">4250</a>                                                                   | 889.86                      | 1777.71      | 1777.72    | -5.72               | 0           | 105   | 2.9e-011 | 1    | R.TYTDAMQTYNGNDR.S <a href="#">4251</a> <a href="#">4252</a>                                                                                 |
| 111.                                                                                   | <a href="#">TERA_HUMAN</a>  | Mass: 89950  | Score: 223 | Queries matched: 4  | emPAI: 0.08 |       |          |      |                                                                                                                                              |
| Transitional endoplasmic reticulum ATPase OS=Homo sapiens GN=VCP PE=1 SV=4             |                             |              |            |                     |             |       |          |      |                                                                                                                                              |
| Query                                                                                  | Observed                    | Mr(expt)     | Mr(calc)   | ppm                 | Miss        | Score | Expect   | Rank | Peptide                                                                                                                                      |
| <a href="#">1411</a>                                                                   | 538.27                      | 1074.53      | 1074.53    | -2.52               | 0           | 71    | 6.5e-007 | 1    | K.LAGESESNLR.K <a href="#">1412</a>                                                                                                          |
| <a href="#">1614</a>                                                                   | 558.76                      | 1115.50      | 1115.50    | 1.10                | 0           | 83    | 1.6e-008 | 1    | R.GGNIGDGGGAADR.V <a href="#">1615</a>                                                                                                       |
| 112.                                                                                   | <a href="#">CD38_HUMAN</a>  | Mass: 35218  | Score: 222 | Queries matched: 12 | emPAI: 0.66 |       |          |      |                                                                                                                                              |
| ADP-ribosyl cyclase 1 OS=Homo sapiens GN=CD38 PE=1 SV=2                                |                             |              |            |                     |             |       |          |      |                                                                                                                                              |
| Query                                                                                  | Observed                    | Mr(expt)     | Mr(calc)   | ppm                 | Miss        | Score | Expect   | Rank | Peptide                                                                                                                                      |
| <a href="#">1481</a>                                                                   | 544.81                      | 1087.61      | 1087.61    | 0.05                | 1           | 45    | 0.00018  | 1    | K.RFPETVLAR.C                                                                                                                                |
| <a href="#">1486</a>                                                                   | 545.27                      | 1088.52      | 1088.52    | -1.59               | 0           | 24    | 0.022    | 1    | R.DLCQDPTIK.E <a href="#">1485</a>                                                                                                           |
| <a href="#">1621</a>                                                                   | 559.29                      | 1116.56      | 1116.56    | -2.48               | 0           | 51    | 7.3e-005 | 1    | K.LGTQTVPCNK.I <a href="#">1620</a> <a href="#">1622</a> <a href="#">1623</a> <a href="#">1624</a> <a href="#">1625</a> <a href="#">1626</a> |
| <a href="#">2300</a>                                                                   | 619.75                      | 1237.48      | 1237.48    | 0.24                | 0           | 21    | 0.0078   | 1    | K.NPEDSSCTSEI.-                                                                                                                              |
| <a href="#">2799</a>                                                                   | 669.80                      | 1337.59      | 1337.58    | 4.19                | 0           | 62    | 1.9e-006 | 1    | K.INYQSCPDR.K                                                                                                                                |
| 113.                                                                                   | <a href="#">CIB1_HUMAN</a>  | Mass: 21861  | Score: 222 | Queries matched: 5  | emPAI: 0.91 |       |          |      |                                                                                                                                              |
| Calcium and integrin-binding protein 1 OS=Homo sapiens GN=CIB1 PE=1 SV=4               |                             |              |            |                     |             |       |          |      |                                                                                                                                              |
| Query                                                                                  | Observed                    | Mr(expt)     | Mr(calc)   | ppm                 | Miss        | Score | Expect   | Rank | Peptide                                                                                                                                      |
| <a href="#">178</a>                                                                    | 418.73                      | 835.44       | 835.44     | -0.25               | 0           | 32    | 0.0052   | 1    | R.VFSTSPAK.D                                                                                                                                 |
| <a href="#">902</a>                                                                    | 493.24                      | 984.46       | 984.46     | 2.89                | 0           | 63    | 2.1e-006 | 1    | R.SPDPASSFK.I                                                                                                                                |
| <a href="#">2710</a>                                                                   | 660.33                      | 1318.64      | 1318.63    | 6.43                | 0           | 44    | 0.00034  | 1    | R.FCELLPQEQR.S                                                                                                                               |
| <a href="#">3275</a>                                                                   | 732.34                      | 1462.67      | 1462.67    | 1.67                | 0           | 93    | 2.7e-009 | 1    | R.LVNCLTGEGEDTR.L <a href="#">3277</a>                                                                                                       |
| 114.                                                                                   | <a href="#">HEBP1_HUMAN</a> | Mass: 21198  | Score: 221 | Queries matched: 6  | emPAI: 0.39 |       |          |      |                                                                                                                                              |
| Heme-binding protein 1 OS=Homo sapiens GN=HEBP1 PE=1 SV=1                              |                             |              |            |                     |             |       |          |      |                                                                                                                                              |
| Query                                                                                  | Observed                    | Mr(expt)     | Mr(calc)   | ppm                 | Miss        | Score | Expect   | Rank | Peptide                                                                                                                                      |
| <a href="#">1652</a>                                                                   | 562.27                      | 1122.52      | 1122.53    | -6.67               | 0           | 35    | 0.002    | 1    | K.EADYVAQATR.L                                                                                                                               |
| <a href="#">3835</a>                                                                   | 820.90                      | 1639.79      | 1639.78    | 3.70                | 0           | 62    | 4.5e-006 | 1    | R.IPNQFQSDPPAPSDK.S <a href="#">3831</a> <a href="#">3832</a> <a href="#">3833</a> <a href="#">3834</a>                                      |
| 115.                                                                                   | <a href="#">MYO1D_HUMAN</a> | Mass: 116927 | Score: 219 | Queries matched: 15 | emPAI: 0.10 |       |          |      |                                                                                                                                              |

Unconventional myosin-Id OS=Homo sapiens GN=MYO1D PE=1 SV=2

| Query                | Observed | Mr(expt) | Mr(calc) | ppm   | Miss | Score | Expect   | Rank | Peptide                                                                                           |
|----------------------|----------|----------|----------|-------|------|-------|----------|------|---------------------------------------------------------------------------------------------------|
| <a href="#">463</a>  | 448.72   | 895.43   | 895.43   | -2.19 | 0    | 16    | 0.19     | 4    | R.DTIEQYK.G <a href="#">461</a> <a href="#">462</a>                                               |
| <a href="#">736</a>  | 476.23   | 950.45   | 950.45   | -1.36 | 0    | 62    | 4.4e-006 | 1    | K.CTVSVETR.L <a href="#">735</a>                                                                  |
| <a href="#">925</a>  | 495.77   | 989.52   | 989.52   | 4.65  | 0    | 2     | 6.3      | 1    | R.SGFILSVPGN.-                                                                                    |
| <a href="#">1111</a> | 513.29   | 1024.57  | 1024.57  | 5.68  | 0    | 46    | 0.00011  | 1    | R.VIVQQPGER.S <a href="#">1107</a> <a href="#">1108</a> <a href="#">1109</a> <a href="#">1110</a> |
| <a href="#">2029</a> | 594.30   | 1186.59  | 1186.60  | -5.76 | 0    | 42    | 0.00054  | 1    | R.LNQPPDFTK.N <a href="#">2030</a> <a href="#">2032</a> <a href="#">2033</a>                      |

116. [MYH9\\_HUMAN](#) Mass: 227646 Score: 217 Queries matched: 6 emPAI: 0.03

Myosin-9 OS=Homo sapiens GN=MYH9 PE=1 SV=4

| Query                | Observed | Mr(expt) | Mr(calc) | ppm   | Miss | Score | Expect   | Rank | Peptide                                  |
|----------------------|----------|----------|----------|-------|------|-------|----------|------|------------------------------------------|
| <a href="#">439</a>  | 446.75   | 891.48   | 891.47   | 9.33  | 1    | 11    | 0.78     | 4    | K.KLEMDLK.D                              |
| <a href="#">1242</a> | 523.29   | 1044.56  | 1044.56  | -2.61 | 0    | 3     | 3.9      | 2    | R.LEVNLQAMK.A                            |
| <a href="#">2277</a> | 618.25   | 1234.49  | 1234.49  | -4.15 | 0    | 2     | 0.61     | 1    | K.GAGDGSDEVDGK.A                         |
| <a href="#">3708</a> | 796.35   | 1590.70  | 1590.69  | 0.57  | 0    | 93    | 1.1e-009 | 1    | R.NTDQASMPDNTAAQK.V <a href="#">3707</a> |
| <a href="#">3748</a> | 804.35   | 1606.69  | 1606.69  | 0.61  | 0    | (62)  | 1.1e-006 | 1    | R.NTDQASMPDNTAAQK.V                      |

117. [MYH11\\_HUMAN](#) Mass: 228054 Score: 217 Queries matched: 6 emPAI: 0.03

Myosin-11 OS=Homo sapiens GN=MYH11 PE=1 SV=3

| Query                | Observed | Mr(expt) | Mr(calc) | ppm   | Miss | Score | Expect   | Rank | Peptide                                  |
|----------------------|----------|----------|----------|-------|------|-------|----------|------|------------------------------------------|
| <a href="#">89</a>   | 409.21   | 816.40   | 816.40   | -2.52 | 0    | 4     | 2.7      | 8    | R.NALQDEK.R                              |
| <a href="#">1854</a> | 577.27   | 1152.53  | 1152.53  | -0.58 | 0    | 6     | 1.4      | 3    | K.MTESLPSASK.T <a href="#">1851</a>      |
| <a href="#">3708</a> | 796.35   | 1590.70  | 1590.69  | 0.57  | 0    | 93    | 1.1e-009 | 1    | R.NTDQASMPDNTAAQK.V <a href="#">3707</a> |
| <a href="#">3748</a> | 804.35   | 1606.69  | 1606.69  | 0.61  | 0    | (62)  | 1.1e-006 | 1    | R.NTDQASMPDNTAAQK.V                      |

118. [RAB1A\\_HUMAN](#) Mass: 22891 Score: 214 Queries matched: 7 emPAI: 0.86

Ras-related protein Rab-1A OS=Homo sapiens GN=RAB1A PE=1 SV=3

| Query                | Observed | Mr(expt) | Mr(calc) | ppm   | Miss | Score | Expect   | Rank | Peptide                                                   |
|----------------------|----------|----------|----------|-------|------|-------|----------|------|-----------------------------------------------------------|
| <a href="#">1247</a> | 523.75   | 1045.49  | 1045.49  | -0.40 | 0    | 51    | 4.2e-005 | 1    | R.MPGATAGGAEK.S <a href="#">1245</a>                      |
| <a href="#">1348</a> | 531.75   | 1061.48  | 1061.48  | -3.09 | 0    | (46)  | 0.00011  | 1    | R.MPGATAGGAEK.S <a href="#">1349</a> <a href="#">1350</a> |
| <a href="#">1398</a> | 536.33   | 1070.64  | 1070.63  | 3.27  | 0    | 51    | 4.5e-005 | 1    | K.LLLIGDSGVGK.S                                           |
| <a href="#">2701</a> | 658.83   | 1315.65  | 1315.65  | 1.50  | 0    | 74    | 3.2e-007 | 1    | K.LQIWDTAGQER.F                                           |

119. [NHRF2\\_HUMAN](#) Mass: 37619 Score: 211 Queries matched: 9 emPAI: 0.21

Na(+)/H(+) exchange regulatory cofactor NHE-RF2 OS=Homo sapiens GN=SLC9A3R2 PE=1 SV=2

| Query                | Observed | Mr(expt) | Mr(calc) | ppm   | Miss | Score | Expect   | Rank | Peptide                                                                                             |
|----------------------|----------|----------|----------|-------|------|-------|----------|------|-----------------------------------------------------------------------------------------------------|
| <a href="#">750</a>  | 478.74   | 955.47   | 955.47   | -0.43 | 0    | 48    | 9.8e-005 | 1    | R.SVDPGSPAAR.S <a href="#">748</a> <a href="#">749</a>                                              |
| <a href="#">2941</a> | 683.81   | 1365.61  | 1365.60  | 3.39  | 0    | 59    | 3.5e-006 | 1    | R.QLTCTEEMAQR.G <a href="#">2938</a> <a href="#">2939</a> <a href="#">2940</a> <a href="#">2942</a> |
| <a href="#">4312</a> | 904.40   | 1806.78  | 1806.79  | -4.62 | 1    | 1     | 2.8      | 3    | R.SDLPGSDKDTEGSAWK.Q                                                                                |

120. [G6PI\\_HUMAN](#) Mass: 63335 Score: 211 Queries matched: 8 emPAI: 0.12

Glucose-6-phosphate isomerase OS=Homo sapiens GN=GPI PE=1 SV=4

| Query               | Observed | Mr(expt) | Mr(calc) | ppm   | Miss | Score | Expect   | Rank | Peptide                                                                 |
|---------------------|----------|----------|----------|-------|------|-------|----------|------|-------------------------------------------------------------------------|
| <a href="#">225</a> | 423.20   | 844.39   | 844.39   | -3.14 | 0    | 54    | 1.8e-005 | 1    | K.SPEDLER.L <a href="#">226</a> <a href="#">227</a> <a href="#">228</a> |
| <a href="#">260</a> | 426.71   | 851.41   | 851.41   | -0.62 | 0    | 44    | 0.00036  | 1    | K.INYTEGR.A <a href="#">258</a> <a href="#">259</a> <a href="#">261</a> |

121. [GNAI1\\_HUMAN](#) Mass: 40905 Score: 210 Queries matched: 4 emPAI: 0.30

Guanine nucleotide-binding protein G(i) subunit alpha-1 OS=Homo sapiens GN=GNAI1 PE=1 SV=2

| Query                | Observed | Mr(expt) | Mr(calc) | ppm   | Miss | Score | Expect   | Rank | Peptide                               |
|----------------------|----------|----------|----------|-------|------|-------|----------|------|---------------------------------------|
| <a href="#">547</a>  | 455.22   | 908.42   | 908.42   | 2.56  | 0    | 53    | 3.1e-005 | 1    | K.MFDVGGQR.S                          |
| <a href="#">1316</a> | 529.32   | 1056.62  | 1056.62  | 0.47  | 0    | 73    | 2.5e-007 | 1    | K.LLLLIGAGESGK.S <a href="#">1317</a> |
| <a href="#">1846</a> | 577.26   | 1152.50  | 1152.50  | -2.07 | 0    | 73    | 1.2e-007 | 1    | K.DSGVQACFNR.S                        |

122. [CD9\\_HUMAN](#) Mass: 25969 Score: 209 Queries matched: 12 emPAI: 1.27

CD9 antigen OS=Homo sapiens GN=CD9 PE=1 SV=4

| Query                | Observed | Mr(expt) | Mr(calc) | ppm   | Miss | Score | Expect   | Rank | Peptide                                              |
|----------------------|----------|----------|----------|-------|------|-------|----------|------|------------------------------------------------------|
| <a href="#">168</a>  | 417.23   | 832.45   | 832.45   | 2.26  | 1    | 5     | 2.3      | 3    | -.MPVKGGTK.C <a href="#">163</a> <a href="#">164</a> |
| <a href="#">351</a>  | 437.22   | 872.43   | 872.44   | -0.66 | 1    | 41    | 0.00048  | 1    | K.TKDEPQR.E                                          |
| <a href="#">705</a>  | 471.73   | 941.45   | 941.45   | 5.78  | 0    | 33    | 0.0028   | 1    | K.EVQEFYK.D <a href="#">704</a>                      |
| <a href="#">1287</a> | 526.29   | 1050.56  | 1050.56  | -0.53 | 0    | 39    | 0.00088  | 1    | K.DVLETFYVK.S                                        |
| <a href="#">1607</a> | 558.29   | 1114.56  | 1114.56  | 1.45  | 1    | 29    | 0.0082   | 1    | K.DEPQRETLK.A <a href="#">1608</a>                   |
| <a href="#">2002</a> | 590.33   | 1178.65  | 1178.65  | -0.36 | 1    | 82    | 3.1e-008 | 1    | K.KDVLETFYVK.S <a href="#">2004</a>                  |
| <a href="#">3598</a> | 782.37   | 1562.73  | 1562.73  | 1.52  | 1    | 51    | 4e-005   | 1    | K.EVQEFYKDTYNK.L                                     |

123. [FLOT1\\_HUMAN](#) Mass: 47554 Score: 209 Queries matched: 8 emPAI: 0.16

Flotillin-1 OS=Homo sapiens GN=FLOT1 PE=1 SV=3

| Query                | Observed | Mr(expt) | Mr(calc) | ppm   | Miss | Score | Expect   | Rank | Peptide                                                     |
|----------------------|----------|----------|----------|-------|------|-------|----------|------|-------------------------------------------------------------|
| <a href="#">390</a>  | 442.73   | 883.45   | 883.44   | 1.42  | 0    | 5     | 1.8      | 5    | K.FSEQVFK.V                                                 |
| <a href="#">643</a>  | 465.74   | 929.46   | 929.46   | 0.20  | 0    | 48    | 0.0001   | 1    | K.QQIEEQR.V <a href="#">644</a>                             |
| <a href="#">1497</a> | 546.28   | 1090.54  | 1090.54  | -2.86 | 0    | 16    | 0.27     | 1    | R.GEAEFAFAGAR.A                                             |
| <a href="#">2508</a> | 640.33   | 1278.65  | 1278.66  | -1.77 | 1    | 6     | 2.1      | 5    | K.KAAYDIEVNTR.R                                             |
| <a href="#">3303</a> | 735.39   | 1468.76  | 1468.76  | -3.14 | 0    | 85    | 2.1e-008 | 1    | R.AQQVAVQEQEIAR.R <a href="#">3304</a> <a href="#">3305</a> |

124. [S52A3\\_HUMAN](#) Mass: 51741 Score: 208 Queries matched: 8 emPAI: 0.15

Solute carrier family 52, riboflavin transporter, member 3 OS=Homo sapiens GN=SLC52A3 PE=1 SV=4

| Query                | Observed | Mr(expt) | Mr(calc) | ppm  | Miss | Score | Expect   | Rank | Peptide                                                                                                                                                                       |
|----------------------|----------|----------|----------|------|------|-------|----------|------|-------------------------------------------------------------------------------------------------------------------------------------------------------------------------------|
| <a href="#">5045</a> | 1212.05  | 2422.08  | 2422.08  | 0.02 | 0    | 79    | 2.4e-008 | 1    | R.EENDLGPAGTVDSQQGQYLEEK.A <a href="#">5042</a> <a href="#">5043</a> <a href="#">5044</a> <a href="#">5047</a> <a href="#">5049</a> <a href="#">5050</a> <a href="#">5051</a> |

125. [1433F\\_HUMAN](#) Mass: 28372 Score: 208 Queries matched: 8 emPAI: 0.46

14-3-3 protein eta OS=Homo sapiens GN=YWHAH PE=1 SV=4

| Query                | Observed | Mr(expt) | Mr(calc) | ppm   | Miss | Score | Expect   | Rank | Peptide                                                              |
|----------------------|----------|----------|----------|-------|------|-------|----------|------|----------------------------------------------------------------------|
| <a href="#">86</a>   | 408.71   | 815.41   | 815.41   | 0.04  | 0    | 56    | 1.8e-005 | 1    | R.LAEQAER.Y <a href="#">83</a> <a href="#">84</a> <a href="#">85</a> |
| <a href="#">498</a>  | 452.26   | 902.51   | 902.51   | 0.50  | 0    | 49    | 0.00011  | 1    | R.VISSIEQK.T <a href="#">499</a>                                     |
| <a href="#">538</a>  | 454.27   | 906.53   | 906.52   | 8.47  | 0    | 37    | 0.0012   | 1    | R.NLLSVAYK.N                                                         |
| <a href="#">1040</a> | 505.23   | 1008.45  | 1008.45  | -4.32 | 1    | 3     | 2.4      | 4    | K.TMADGNEKK.L                                                        |

126. [1433S\\_HUMAN](#) Mass: 27871 Score: 208 Queries matched: 7 emPAI: 0.47

14-3-3 protein sigma OS=Homo sapiens GN=SFN PE=1 SV=1

| Query               | Observed | Mr(expt) | Mr(calc) | ppm  | Miss | Score | Expect   | Rank | Peptide                                                              |
|---------------------|----------|----------|----------|------|------|-------|----------|------|----------------------------------------------------------------------|
| <a href="#">86</a>  | 408.71   | 815.41   | 815.41   | 0.04 | 0    | 56    | 1.8e-005 | 1    | R.LAEQAER.Y <a href="#">83</a> <a href="#">84</a> <a href="#">85</a> |
| <a href="#">498</a> | 452.26   | 902.51   | 902.51   | 0.50 | 0    | 49    | 0.00011  | 1    | R.VLSSIEQK.S <a href="#">499</a>                                     |
| <a href="#">538</a> | 454.27   | 906.53   | 906.52   | 8.47 | 0    | 37    | 0.0012   | 1    | R.NLLSVAYK.N                                                         |

127. [RAB8A\\_HUMAN](#) Mass: 23824 Score: 206 Queries matched: 16 emPAI: 0.56

Ras-related protein Rab-8A OS=Homo sapiens GN=RAB8A PE=1 SV=1

| Query                | Observed | Mr(expt) | Mr(calc) | ppm   | Miss | Score | Expect   | Rank | Peptide                                                                                                                             |
|----------------------|----------|----------|----------|-------|------|-------|----------|------|-------------------------------------------------------------------------------------------------------------------------------------|
| <a href="#">141</a>  | 415.23   | 828.44   | 828.43   | 2.27  | 0    | 15    | 0.16     | 1    | K.ITPDQOK.R <a href="#">135</a> <a href="#">136</a> <a href="#">137</a> <a href="#">139</a> <a href="#">140</a> <a href="#">142</a> |
| <a href="#">1398</a> | 536.33   | 1070.64  | 1070.63  | 3.27  | 0    | 51    | 4.5e-005 | 1    | K.LLLIGDSGVGK.T                                                                                                                     |
| <a href="#">2701</a> | 658.83   | 1315.65  | 1315.65  | 1.50  | 0    | 74    | 3.2e-007 | 1    | K.LQIWDTAGQER.F                                                                                                                     |
| <a href="#">3090</a> | 703.84   | 1405.66  | 1405.67  | -5.61 | 1    | (0)   | 5.1      | 2    | K.MILGNKCDVNDK.R                                                                                                                    |
| <a href="#">3126</a> | 707.85   | 1413.69  | 1413.68  | 3.35  | 0    | 73    | 3.4e-007 | 1    | K.LEGNSPQGSNQGQVK.I <a href="#">3125</a>                                                                                            |
| <a href="#">3141</a> | 711.83   | 1421.65  | 1421.66  | -8.07 | 1    | 4     | 1.6      | 4    | K.MILGNKCDVNDK.R <a href="#">3143</a> <a href="#">3144</a> <a href="#">3145</a>                                                     |

|                                                                              |                             |              |            |                    |             |               |      |                                                                                         |
|------------------------------------------------------------------------------|-----------------------------|--------------|------------|--------------------|-------------|---------------|------|-----------------------------------------------------------------------------------------|
| 128.                                                                         | <a href="#">CNDP2_HUMAN</a> | Mass: 53187  | Score: 206 | Queries matched: 6 | emPAI: 0.23 |               |      |                                                                                         |
| Cytosolic non-specific dipeptidase OS=Homo sapiens GN=CNDP2 PE=1 SV=2        |                             |              |            |                    |             |               |      |                                                                                         |
| Query                                                                        | Observed                    | Mr(expt)     | Mr(calc)   | ppm                | Miss Score  | Expect        | Rank | Peptide                                                                                 |
| <a href="#">1595</a>                                                         | 556.81                      | 1111.61      | 1111.60    | 6.51               | 0           | 66 1.3e-006   | 1    | K.TGQEIPVNV.R.F <a href="#">1593</a>                                                    |
| <a href="#">2270</a>                                                         | 617.33                      | 1232.64      | 1232.64    | -1.59              | 0           | 27 0.016      | 1    | K.TVFGVEPDLTR.E <a href="#">2271</a>                                                    |
| <a href="#">4108</a>                                                         | 867.95                      | 1733.88      | 1733.88    | 0.45               | 0           | 78 1.3e-007   | 1    | R.EGGSIPVTLTFQATGK.N <a href="#">4109</a>                                               |
| 129.                                                                         | <a href="#">PLS3_HUMAN</a>  | Mass: 32369  | Score: 206 | Queries matched: 3 | emPAI: 0.12 |               |      |                                                                                         |
| Phospholipid scramblase 3 OS=Homo sapiens GN=PLSCR3 PE=1 SV=2                |                             |              |            |                    |             |               |      |                                                                                         |
| Query                                                                        | Observed                    | Mr(expt)     | Mr(calc)   | ppm                | Miss Score  | Expect        | Rank | Peptide                                                                                 |
| <a href="#">4557</a>                                                         | 981.92                      | 1961.82      | 1961.83    | -5.64              | 0           | 97 2.4e-010   | 1    | R.SGAGQPLGQAAEESNCCAR.L <a href="#">4558</a> <a href="#">4559</a>                       |
| 130.                                                                         | <a href="#">PCY2_HUMAN</a>  | Mass: 44264  | Score: 206 | Queries matched: 3 | emPAI: 0.08 |               |      |                                                                                         |
| Ethanalamine-phosphate cytidyltransferase OS=Homo sapiens GN=PCYT2 PE=1 SV=1 |                             |              |            |                    |             |               |      |                                                                                         |
| Query                                                                        | Observed                    | Mr(expt)     | Mr(calc)   | ppm                | Miss Score  | Expect        | Rank | Peptide                                                                                 |
| <a href="#">2009</a>                                                         | 591.29                      | 1180.56      | 1180.56    | -0.77              | 0           | 92 4e-009     | 1    | R.GAAGGAEQPGPGGR.R <a href="#">2008</a> <a href="#">2010</a>                            |
| 131.                                                                         | <a href="#">MRP_HUMAN</a>   | Mass: 19574  | Score: 205 | Queries matched: 3 | emPAI: 0.43 |               |      |                                                                                         |
| MARCKS-related protein OS=Homo sapiens GN=MARCKSL1 PE=1 SV=2                 |                             |              |            |                    |             |               |      |                                                                                         |
| Query                                                                        | Observed                    | Mr(expt)     | Mr(calc)   | ppm                | Miss Score  | Expect        | Rank | Peptide                                                                                 |
| <a href="#">2749</a>                                                         | 664.33                      | 1326.64      | 1326.64    | -1.62              | 0           | 45 0.00019    | 1    | K.AAATPESQEPQAK.G                                                                       |
| <a href="#">2968</a>                                                         | 687.33                      | 1372.64      | 1372.65    | -4.14              | 0           | 108 7.5e-011  | 1    | R.GDVTAEAEAGASPAK.A <a href="#">2969</a>                                                |
| 132.                                                                         | <a href="#">FAS_HUMAN</a>   | Mass: 275877 | Score: 202 | Queries matched: 7 | emPAI: 0.04 |               |      |                                                                                         |
| Fatty acid synthase OS=Homo sapiens GN=FASN PE=1 SV=3                        |                             |              |            |                    |             |               |      |                                                                                         |
| Query                                                                        | Observed                    | Mr(expt)     | Mr(calc)   | ppm                | Miss Score  | Expect        | Rank | Peptide                                                                                 |
| <a href="#">26</a>                                                           | 402.73                      | 803.44       | 803.44     | 0.25               | 0           | 4 5.9         | 7    | K.LQELSSK.A                                                                             |
| <a href="#">248</a>                                                          | 424.73                      | 847.44       | 847.45     | -6.37              | 0           | 8 1.6         | 4    | R.DIMLATGK.L                                                                            |
| <a href="#">527</a>                                                          | 454.23                      | 906.44       | 906.44     | 0.34               | 0           | 58 1.4e-005   | 1    | R.AAEQYTPK.A <a href="#">526</a>                                                        |
| <a href="#">2056</a>                                                         | 596.79                      | 1191.56      | 1191.56    | 1.18               | 0           | 9 0.86        | 1    | R.LGMLSPEGTCK.A                                                                         |
| <a href="#">3035</a>                                                         | 694.82                      | 1387.62      | 1387.63    | -6.72              | 0           | 60 4e-006     | 1    | K.ADEASELACPTPK.E                                                                       |
| <a href="#">4268</a>                                                         | 895.38                      | 1788.75      | 1788.75    | -1.86              | 0           | 84 6.1e-009   | 1    | R.GNAGQSNYGFANSAMER.I                                                                   |
| 133.                                                                         | <a href="#">RB27B_HUMAN</a> | Mass: 24820  | Score: 199 | Queries matched: 9 | emPAI: 0.53 |               |      |                                                                                         |
| Ras-related protein Rab-27B OS=Homo sapiens GN=RAB27B PE=1 SV=4              |                             |              |            |                    |             |               |      |                                                                                         |
| Query                                                                        | Observed                    | Mr(expt)     | Mr(calc)   | ppm                | Miss Score  | Expect        | Rank | Peptide                                                                                 |
| <a href="#">75</a>                                                           | 407.70                      | 813.40       | 813.40     | -3.48              | 0           | 49 6.3e-005   | 1    | K.ADLPDQR.E <a href="#">76</a> <a href="#">77</a> <a href="#">78</a> <a href="#">79</a> |
| <a href="#">603</a>                                                          | 462.20                      | 922.39       | 922.39     | 0.47               | 0           | (44) 8.1e-005 | 1    | R.MEQCVEK.T <a href="#">604</a>                                                         |
| <a href="#">690</a>                                                          | 470.20                      | 938.39       | 938.38     | 2.17               | 0           | 44 6.9e-005   | 1    | R.MEQCVEK.T <a href="#">689</a>                                                         |
| 134.                                                                         | <a href="#">CLUS_HUMAN</a>  | Mass: 53031  | Score: 198 | Queries matched: 8 | emPAI: 0.23 |               |      |                                                                                         |
| Clusterin OS=Homo sapiens GN=CLU PE=1 SV=1                                   |                             |              |            |                    |             |               |      |                                                                                         |
| Query                                                                        | Observed                    | Mr(expt)     | Mr(calc)   | ppm                | Miss Score  | Expect        | Rank | Peptide                                                                                 |
| <a href="#">1394</a>                                                         | 536.29                      | 1070.57      | 1070.57    | -4.91              | 0           | 52 4.4e-005   | 1    | K.EIQNAVNGVK.Q <a href="#">1395</a> <a href="#">1396</a>                                |
| <a href="#">2559</a>                                                         | 644.82                      | 1287.63      | 1287.63    | 3.10               | 0           | 60 6.9e-006   | 1    | R.ELDESLOVAER.L                                                                         |
| <a href="#">4205</a>                                                         | 881.92                      | 1761.83      | 1761.82    | 4.56               | 0           | 63 3e-006     | 1    | R.EILSVDCSTNNPSQAK.L <a href="#">4201</a> <a href="#">4202</a> <a href="#">4203</a>     |
| 135.                                                                         | <a href="#">TSN31_HUMAN</a> | Mass: 23665  | Score: 198 | Queries matched: 4 | emPAI: 0.16 |               |      |                                                                                         |
| Tetraspanin-31 OS=Homo sapiens GN=TSPAN31 PE=2 SV=1                          |                             |              |            |                    |             |               |      |                                                                                         |
| Query                                                                        | Observed                    | Mr(expt)     | Mr(calc)   | ppm                | Miss Score  | Expect        | Rank | Peptide                                                                                 |
| <a href="#">3106</a>                                                         | 706.78                      | 1411.55      | 1411.55    | -2.47              | 0           | 77 2.2e-008   | 1    | K.SQSPTCQMGCEK.F <a href="#">3107</a> <a href="#">3108</a> <a href="#">3109</a>         |

|                                                                                                  |                             |              |            |                    |             |        |          |         |                                                                                     |
|--------------------------------------------------------------------------------------------------|-----------------------------|--------------|------------|--------------------|-------------|--------|----------|---------|-------------------------------------------------------------------------------------|
| 136.                                                                                             | <a href="#">FXL20_HUMAN</a> | Mass: 50216  | Score: 198 | Queries matched: 4 | emPAI: 0.07 |        |          |         |                                                                                     |
| F-box/LRR-repeat protein 20 OS=Homo sapiens GN=FBXL20 PE=1 SV=2                                  |                             |              |            |                    |             |        |          |         |                                                                                     |
| Query                                                                                            | Observed                    | Mr(expt)     | Mr(calc)   | ppm                | Miss Score  | Expect | Rank     | Peptide |                                                                                     |
| <a href="#">2017</a>                                                                             | 592.78                      | 1183.54      | 1183.54    | -1.89              | 0           | 82     | 2.8e-008 | 1       | K.TDATCTSLSK.F <a href="#">2016</a> <a href="#">2018</a> <a href="#">2019</a>       |
| 137.                                                                                             | <a href="#">TCPRI_HUMAN</a> | Mass: 131439 | Score: 197 | Queries matched: 4 | emPAI: 0.03 |        |          |         |                                                                                     |
| Tectonin beta-propeller repeat-containing protein 1 OS=Homo sapiens GN=TECPRI PE=1 SV=1          |                             |              |            |                    |             |        |          |         |                                                                                     |
| Query                                                                                            | Observed                    | Mr(expt)     | Mr(calc)   | ppm                | Miss Score  | Expect | Rank     | Peptide |                                                                                     |
| <a href="#">4026</a>                                                                             | 854.36                      | 1706.70      | 1706.71    | -3.25              | 0           | 85     | 4.3e-009 | 1       | R.TAEDTVEDACPAEGSR.E <a href="#">4027</a> <a href="#">4028</a> <a href="#">4029</a> |
| 138.                                                                                             | <a href="#">RAB3A_HUMAN</a> | Mass: 25196  | Score: 195 | Queries matched: 5 | emPAI: 0.53 |        |          |         |                                                                                     |
| Ras-related protein Rab-3A OS=Homo sapiens GN=RAB3A PE=1 SV=1                                    |                             |              |            |                    |             |        |          |         |                                                                                     |
| Query                                                                                            | Observed                    | Mr(expt)     | Mr(calc)   | ppm                | Miss Score  | Expect | Rank     | Peptide |                                                                                     |
| <a href="#">848</a>                                                                              | 488.26                      | 974.51       | 974.51     | 0.68               | 0           | 53     | 5e-005   | 1       | R.LVDVICEK.M <a href="#">849</a>                                                    |
| <a href="#">1538</a>                                                                             | 550.84                      | 1099.66      | 1099.66    | 3.69               | 0           | 68     | 5.1e-007 | 1       | K.ILIIGNSSVGK.T <a href="#">1537</a>                                                |
| <a href="#">2701</a>                                                                             | 658.83                      | 1315.65      | 1315.65    | 1.50               | 0           | 74     | 3.2e-007 | 1       | K.LQIWDTAGQER.Y                                                                     |
| 139.                                                                                             | <a href="#">CAZAI_HUMAN</a> | Mass: 33073  | Score: 195 | Queries matched: 4 | emPAI: 0.24 |        |          |         |                                                                                     |
| F-actin-capping protein subunit alpha-1 OS=Homo sapiens GN=CAPZAI PE=1 SV=3                      |                             |              |            |                    |             |        |          |         |                                                                                     |
| Query                                                                                            | Observed                    | Mr(expt)     | Mr(calc)   | ppm                | Miss Score  | Expect | Rank     | Peptide |                                                                                     |
| <a href="#">521</a>                                                                              | 453.72                      | 905.42       | 905.43     | -2.96              | 1           | 11     | 0.48     | 1       | K.IGKEMQNA.-                                                                        |
| <a href="#">3528</a>                                                                             | 771.85                      | 1541.68      | 1541.68    | -1.65              | 0           | 89     | 4e-009   | 1       | K.EASDPQPEEADGGLK.S <a href="#">3527</a>                                            |
| <a href="#">4022</a>                                                                             | 853.41                      | 1704.81      | 1704.82    | -4.87              | 0           | 57     | 1.4e-005 | 1       | K.DVQDSLTVSNEAQTAK.E                                                                |
| 140.                                                                                             | <a href="#">WFDC8_HUMAN</a> | Mass: 29516  | Score: 193 | Queries matched: 3 | emPAI: 0.44 |        |          |         |                                                                                     |
| WAP four-disulfide core domain protein 8 OS=Homo sapiens GN=WFDC8 PE=2 SV=2                      |                             |              |            |                    |             |        |          |         |                                                                                     |
| Query                                                                                            | Observed                    | Mr(expt)     | Mr(calc)   | ppm                | Miss Score  | Expect | Rank     | Peptide |                                                                                     |
| <a href="#">3452</a>                                                                             | 760.34                      | 1518.67      | 1518.67    | 1.04               | 0           | 84     | 1e-008   | 1       | K.CLQDEECPLVEK.C                                                                    |
| <a href="#">4378</a>                                                                             | 920.87                      | 1839.73      | 1839.73    | 4.04               | 0           | 115    | 2.8e-012 | 1       | R.GCEGNANNFLNEDACR.T                                                                |
| <a href="#">5217</a>                                                                             | 909.05                      | 2724.13      | 2724.14    | -1.44              | 1           | 22     | 0.0061   | 1       | R.LTCTTELPDSCNTDFDCKEYQK.C                                                          |
| 141.                                                                                             | <a href="#">MT1G_HUMAN</a>  | Mass: 7277   | Score: 193 | Queries matched: 5 | emPAI: 1.46 |        |          |         |                                                                                     |
| Metallothionein-1G OS=Homo sapiens GN=MT1G PE=1 SV=2                                             |                             |              |            |                    |             |        |          |         |                                                                                     |
| Query                                                                                            | Observed                    | Mr(expt)     | Mr(calc)   | ppm                | Miss Score  | Expect | Rank     | Peptide |                                                                                     |
| <a href="#">949</a>                                                                              | 498.71                      | 995.40       | 995.40     | -0.65              | 0           | 44     | 4.6e-005 | 1       | K.CAQCICK.G <a href="#">950</a>                                                     |
| <a href="#">3213</a>                                                                             | 723.26                      | 1444.50      | 1444.50    | 0.20               | 0           | 79     | 1.3e-008 | 1       | K.SCCSCCPVGCAK.C <a href="#">3212</a>                                               |
| <a href="#">3301</a>                                                                             | 734.82                      | 1467.62      | 1467.63    | -4.85              | 1           | 7      | 0.41     | 1       | K.CAQCICKGASEK.C                                                                    |
| 142.                                                                                             | <a href="#">PROF2_HUMAN</a> | Mass: 15378  | Score: 188 | Queries matched: 2 | emPAI: 0.25 |        |          |         |                                                                                     |
| Profilin-2 OS=Homo sapiens GN=PFN2 PE=1 SV=3                                                     |                             |              |            |                    |             |        |          |         |                                                                                     |
| Query                                                                                            | Observed                    | Mr(expt)     | Mr(calc)   | ppm                | Miss Score  | Expect | Rank     | Peptide |                                                                                     |
| <a href="#">3183</a>                                                                             | 717.85                      | 1433.69      | 1433.69    | 0.09               | 0           | 109    | 8.1e-011 | 1       | K.SQGGEPTYNVAVGR.A <a href="#">3182</a>                                             |
| 143.                                                                                             | <a href="#">ADAM7_HUMAN</a> | Mass: 88122  | Score: 187 | Queries matched: 4 | emPAI: 0.04 |        |          |         |                                                                                     |
| Disintegrin and metalloproteinase domain-containing protein 7 OS=Homo sapiens GN=ADAM7 PE=1 SV=3 |                             |              |            |                    |             |        |          |         |                                                                                     |
| Query                                                                                            | Observed                    | Mr(expt)     | Mr(calc)   | ppm                | Miss Score  | Expect | Rank     | Peptide |                                                                                     |
| <a href="#">3792</a>                                                                             | 813.92                      | 1625.82      | 1625.83    | -4.68              | 0           | 97     | 1.4e-009 | 1       | K.QVQSPPTETLGVENK.G <a href="#">3793</a> <a href="#">3794</a> <a href="#">3795</a>  |
| 144.                                                                                             | <a href="#">PRSS8_HUMAN</a> | Mass: 37093  | Score: 183 | Queries matched: 6 | emPAI: 0.21 |        |          |         |                                                                                     |
| Prostasin OS=Homo sapiens GN=PRSS8 PE=1 SV=1                                                     |                             |              |            |                    |             |        |          |         |                                                                                     |



| Query                                                              | Observed                    | Mr(expt)     | Mr(calc)   | ppm                | Miss        | Score | Expect   | Rank | Peptide                                                                 |
|--------------------------------------------------------------------|-----------------------------|--------------|------------|--------------------|-------------|-------|----------|------|-------------------------------------------------------------------------|
| <a href="#">211</a>                                                | 421.74                      | 841.46       | 841.47     | -2.28              | 0           | 48    | 0.0001   | 1    | K.VTELQPR.V <a href="#">212</a> <a href="#">213</a> <a href="#">214</a> |
| <a href="#">3498</a>                                               | 511.91                      | 1532.72      | 1532.71    | 5.42               | 0           | 60    | 6.3e-006 | 1    | K.LGAHQLDSEDAK.V <a href="#">3497</a>                                   |
| <hr/>                                                              |                             |              |            |                    |             |       |          |      |                                                                         |
| 145.                                                               | <a href="#">RAB8B_HUMAN</a> | Mass: 23740  | Score: 182 | Queries matched: 3 | emPAI: 0.56 |       |          |      |                                                                         |
| Ras-related protein Rab-8B OS=Homo sapiens GN=RAB8B PE=1 SV=2      |                             |              |            |                    |             |       |          |      |                                                                         |
| Query                                                              | Observed                    | Mr(expt)     | Mr(calc)   | ppm                | Miss        | Score | Expect   | Rank | Peptide                                                                 |
| <a href="#">1398</a>                                               | 536.33                      | 1070.64      | 1070.63    | 3.27               | 0           | 51    | 4.5e-005 | 1    | K.LLLIGDSGVGK.T                                                         |
| <a href="#">2651</a>                                               | 652.80                      | 1303.59      | 1303.58    | 2.68               | 0           | 98    | 7.1e-010 | 1    | K.MNDSNSAGAGPVK.I                                                       |
| <a href="#">2701</a>                                               | 658.83                      | 1315.65      | 1315.65    | 1.50               | 0           | 74    | 3.2e-007 | 1    | K.LQIWDTAGQER.F                                                         |
| <hr/>                                                              |                             |              |            |                    |             |       |          |      |                                                                         |
| 146.                                                               | <a href="#">HORN_HUMAN</a>  | Mass: 283140 | Score: 180 | Queries matched: 3 | emPAI: 0.03 |       |          |      |                                                                         |
| Hornerin OS=Homo sapiens GN=HRNR PE=1 SV=2                         |                             |              |            |                    |             |       |          |      |                                                                         |
| Query                                                              | Observed                    | Mr(expt)     | Mr(calc)   | ppm                | Miss        | Score | Expect   | Rank | Peptide                                                                 |
| <a href="#">1756</a>                                               | 570.26                      | 1138.50      | 1138.50    | 1.20               | 0           | 78    | 5.4e-008 | 1    | R.GSGSGQSPSYGR.H                                                        |
| <a href="#">3051</a>                                               | 698.32                      | 1394.62      | 1394.62    | 1.88               | 0           | 92    | 2.5e-009 | 1    | R.YGQQGSGSGQSPSR.G <a href="#">3050</a>                                 |
| <hr/>                                                              |                             |              |            |                    |             |       |          |      |                                                                         |
| 147.                                                               | <a href="#">KIF5A_HUMAN</a> | Mass: 118161 | Score: 179 | Queries matched: 4 | emPAI: 0.03 |       |          |      |                                                                         |
| Kinesin heavy chain isoform 5A OS=Homo sapiens GN=KIF5A PE=1 SV=2  |                             |              |            |                    |             |       |          |      |                                                                         |
| Query                                                              | Observed                    | Mr(expt)     | Mr(calc)   | ppm                | Miss        | Score | Expect   | Rank | Peptide                                                                 |
| <a href="#">367</a>                                                | 440.22                      | 878.42       | 878.42     | 1.38               | 1           | 9     | 1.1      | 2    | K.EAKEGAMK.D <a href="#">366</a>                                        |
| <a href="#">1892</a>                                               | 580.79                      | 1159.57      | 1159.57    | 2.47               | 0           | 102   | 5.9e-010 | 1    | K.TGAEGAVLDEAK.N <a href="#">1891</a>                                   |
| <hr/>                                                              |                             |              |            |                    |             |       |          |      |                                                                         |
| 148.                                                               | <a href="#">KIF5C_HUMAN</a> | Mass: 109997 | Score: 179 | Queries matched: 6 | emPAI: 0.03 |       |          |      |                                                                         |
| Kinesin heavy chain isoform 5C OS=Homo sapiens GN=KIF5C PE=1 SV=1  |                             |              |            |                    |             |       |          |      |                                                                         |
| Query                                                              | Observed                    | Mr(expt)     | Mr(calc)   | ppm                | Miss        | Score | Expect   | Rank | Peptide                                                                 |
| <a href="#">421</a>                                                | 444.75                      | 887.48       | 887.47     | 5.37               | 0           | 3     | 7.5      | 8    | K.IQEELTR.L                                                             |
| <a href="#">1892</a>                                               | 580.79                      | 1159.57      | 1159.57    | 2.47               | 0           | 102   | 5.9e-010 | 1    | K.TGAEGAVLDEAK.N <a href="#">1891</a>                                   |
| <a href="#">2504</a>                                               | 639.79                      | 1277.57      | 1277.57    | -0.95              | 0           | 6     | 0.92     | 2    | K.QLESAQMDSNR.K <a href="#">2505</a> <a href="#">2506</a>               |
| <hr/>                                                              |                             |              |            |                    |             |       |          |      |                                                                         |
| 149.                                                               | <a href="#">1433E_HUMAN</a> | Mass: 29326  | Score: 178 | Queries matched: 6 | emPAI: 0.44 |       |          |      |                                                                         |
| 14-3-3 protein epsilon OS=Homo sapiens GN=YWHAE PE=1 SV=1          |                             |              |            |                    |             |       |          |      |                                                                         |
| Query                                                              | Observed                    | Mr(expt)     | Mr(calc)   | ppm                | Miss        | Score | Expect   | Rank | Peptide                                                                 |
| <a href="#">86</a>                                                 | 408.71                      | 815.41       | 815.41     | 0.04               | 0           | 56    | 1.8e-005 | 1    | K.LAEQAER.Y <a href="#">83</a> <a href="#">84</a> <a href="#">85</a>    |
| <a href="#">538</a>                                                | 454.27                      | 906.53       | 906.52     | 8.47               | 0           | 37    | 0.0012   | 1    | R.NLLSVAYK.N                                                            |
| <a href="#">2069</a>                                               | 597.81                      | 1193.60      | 1193.59    | 9.29               | 0           | 42    | 0.00069  | 1    | K.EAAENSLVAYK.A                                                         |
| <hr/>                                                              |                             |              |            |                    |             |       |          |      |                                                                         |
| 150.                                                               | <a href="#">RRAS2_HUMAN</a> | Mass: 23613  | Score: 178 | Queries matched: 3 | emPAI: 0.16 |       |          |      |                                                                         |
| Ras-related protein R-Ras2 OS=Homo sapiens GN=RRAS2 PE=1 SV=1      |                             |              |            |                    |             |       |          |      |                                                                         |
| Query                                                              | Observed                    | Mr(expt)     | Mr(calc)   | ppm                | Miss        | Score | Expect   | Rank | Peptide                                                                 |
| <a href="#">3028</a>                                               | 693.85                      | 1385.69      | 1385.69    | -2.54              | 0           | 78    | 1.2e-007 | 1    | R.QVTQEEGQQLAR.Q <a href="#">3026</a> <a href="#">3027</a>              |
| <hr/>                                                              |                             |              |            |                    |             |       |          |      |                                                                         |
| 151.                                                               | <a href="#">K1C10_HUMAN</a> | Mass: 59020  | Score: 177 | Queries matched: 3 | emPAI: 0.13 |       |          |      |                                                                         |
| Keratin, type I cytoskeletal 10 OS=Homo sapiens GN=KRT10 PE=1 SV=6 |                             |              |            |                    |             |       |          |      |                                                                         |
| Query                                                              | Observed                    | Mr(expt)     | Mr(calc)   | ppm                | Miss        | Score | Expect   | Rank | Peptide                                                                 |
| <a href="#">1566</a>                                               | 553.77                      | 1105.52      | 1105.52    | 0.27               | 0           | 65    | 2.2e-006 | 1    | K.VTMQNLNDR.L <a href="#">1567</a>                                      |
| <a href="#">2429</a>                                               | 631.80                      | 1261.59      | 1261.59    | 2.68               | 0           | 88    | 8.8e-009 | 1    | R.SLELEGSSGGGR.G                                                        |
| <hr/>                                                              |                             |              |            |                    |             |       |          |      |                                                                         |
| 152.                                                               | <a href="#">MT1E_HUMAN</a>  | Mass: 7150   | Score: 176 | Queries matched: 3 | emPAI: 1.52 |       |          |      |                                                                         |
| Metallothionein-1E OS=Homo sapiens GN=MT1E PE=1 SV=1               |                             |              |            |                    |             |       |          |      |                                                                         |
| Query                                                              | Observed                    | Mr(expt)     | Mr(calc)   | ppm                | Miss        | Score | Expect   | Rank | Peptide                                                                 |

[876](#) 491.70 981.38 981.38 1.78 0 57 2.2e-006 1 K.CAQCVCCK.G  
[3213](#) 723.26 1444.50 1444.50 0.20 0 79 1.3e-008 1 K.SCCSCCPVCGAK.C [3212](#)

153. [TBB2A\\_HUMAN](#) Mass: 50274 Score: 175 Queries matched: 4 emPAI: 0.33

Tubulin beta-2A chain OS=Homo sapiens GN=TUBB2A PE=1 SV=1

| Query                | Observed | Mr(expt) | Mr(calc) | ppm   | Miss | Score | Expect   | Rank | Peptide          |
|----------------------|----------|----------|----------|-------|------|-------|----------|------|------------------|
| <a href="#">1430</a> | 541.22   | 1080.42  | 1080.42  | 0.41  | 0    | (37)  | 0.00026  | 1    | K.NMMAACDPR.H    |
| <a href="#">1522</a> | 549.21   | 1096.41  | 1096.41  | 0.14  | 0    | 43    | 4.7e-005 | 1    | K.NMMAACDPR.H    |
| <a href="#">3217</a> | 723.85   | 1445.68  | 1445.68  | -3.24 | 0    | (66)  | 1.7e-006 | 1    | K.EVDEQMLNVQNK.N |
| <a href="#">3273</a> | 731.85   | 1461.68  | 1461.68  | 0.86  | 0    | 75    | 1.6e-007 | 1    | K.EVDEQMLNVQNK.N |

## Proteins matching the same set of peptides:

[TBB2B\\_HUMAN](#) Mass: 50377 Score: 175 Queries matched: 4

Tubulin beta-2B chain OS=Homo sapiens GN=TUBB2B PE=1 SV=1

[TBB4B\\_HUMAN](#) Mass: 50255 Score: 175 Queries matched: 4

Tubulin beta-4B chain OS=Homo sapiens GN=TUBB4B PE=1 SV=1

[TBB5\\_HUMAN](#) Mass: 50095 Score: 175 Queries matched: 4

Tubulin beta chain OS=Homo sapiens GN=TUBB PE=1 SV=2

154. [PSCA\\_HUMAN](#) Mass: 13474 Score: 175 Queries matched: 2 emPAI: 0.29

Prostate stem cell antigen OS=Homo sapiens GN=PSCA PE=1 SV=1

| Query                | Observed | Mr(expt) | Mr(calc) | ppm   | Miss | Score | Expect | Rank | Peptide                                   |
|----------------------|----------|----------|----------|-------|------|-------|--------|------|-------------------------------------------|
| <a href="#">4600</a> | 990.40   | 1978.79  | 1978.80  | -5.50 | 0    | 100   | 1e-010 | 1    | K.GCSLNCVDDSDYVVGK.K <a href="#">4601</a> |

155. [PODXL\\_HUMAN](#) Mass: 59055 Score: 175 Queries matched: 3 emPAI: 0.06

Podocalyxin OS=Homo sapiens GN=PODXL PE=1 SV=2

| Query                | Observed | Mr(expt) | Mr(calc) | ppm  | Miss | Score | Expect   | Rank | Peptide                                                    |
|----------------------|----------|----------|----------|------|------|-------|----------|------|------------------------------------------------------------|
| <a href="#">3295</a> | 734.32   | 1466.62  | 1466.62  | 0.58 | 0    | 73    | 6.1e-008 | 1    | K.CEDLETQTQSEK.Q <a href="#">3294</a> <a href="#">3296</a> |

156. [STXB2\\_HUMAN](#) Mass: 66867 Score: 175 Queries matched: 15 emPAI: 0.11

Syntaxin-binding protein 2 OS=Homo sapiens GN=STXB2 PE=1 SV=2

| Query                | Observed | Mr(expt) | Mr(calc) | ppm   | Miss | Score | Expect   | Rank | Peptide                                                                                                    |
|----------------------|----------|----------|----------|-------|------|-------|----------|------|------------------------------------------------------------------------------------------------------------|
| <a href="#">42</a>   | 405.21   | 808.41   | 808.41   | -1.54 | 0    | 8     | 1.1      | 9    | R.AAYEVTR.A <a href="#">38</a> <a href="#">39</a> <a href="#">40</a> <a href="#">41</a> <a href="#">43</a> |
| <a href="#">311</a>  | 434.20   | 866.39   | 866.40   | -9.56 | 0    | 14    | 0.12     | 1    | R.ILSSCK.M <a href="#">312</a>                                                                             |
| <a href="#">2062</a> | 597.75   | 1193.49  | 1193.49  | 4.10  | 0    | 7     | 0.31     | 2    | K.DVMEDAVEDR.L <a href="#">2063</a> <a href="#">2064</a> <a href="#">2065</a>                              |
| <a href="#">2091</a> | 600.79   | 1199.56  | 1199.57  | -1.93 | 0    | 63    | 2e-006   | 1    | K.ADTPSLGEPEK.T <a href="#">2090</a>                                                                       |
| <a href="#">4492</a> | 966.48   | 1930.95  | 1930.93  | 5.54  | 0    | 104   | 2.6e-010 | 1    | R.NLEQLGGTVTNPGGSGTSSR.L                                                                                   |

157. [RAB35\\_HUMAN](#) Mass: 23296 Score: 173 Queries matched: 5 emPAI: 0.58

Ras-related protein Rab-35 OS=Homo sapiens GN=RAB35 PE=1 SV=1

| Query                | Observed | Mr(expt) | Mr(calc) | ppm  | Miss | Score | Expect   | Rank | Peptide                             |
|----------------------|----------|----------|----------|------|------|-------|----------|------|-------------------------------------|
| <a href="#">1398</a> | 536.33   | 1070.64  | 1070.63  | 3.27 | 0    | 51    | 4.5e-005 | 1    | K.LLIIGDSGVGK.S                     |
| <a href="#">1914</a> | 582.79   | 1163.57  | 1163.57  | 1.59 | 1    | 3     | 4.1      | 2    | M.ARKYDHLFK.L                       |
| <a href="#">2701</a> | 658.83   | 1315.65  | 1315.65  | 1.50 | 0    | 74    | 3.2e-007 | 1    | K.LQIWDTAGQER.F                     |
| <a href="#">2820</a> | 671.84   | 1341.66  | 1341.66  | 0.34 | 0    | 71    | 4.3e-007 | 1    | K.QQQQQNDVVK.L <a href="#">2819</a> |

158. [GNA12\\_HUMAN](#) Mass: 44422 Score: 173 Queries matched: 5 emPAI: 0.18

Guanine nucleotide-binding protein subunit alpha-12 OS=Homo sapiens GN=GNA12 PE=1 SV=4

| Query                | Observed | Mr(expt) | Mr(calc) | ppm   | Miss | Score | Expect   | Rank | Peptide                              |
|----------------------|----------|----------|----------|-------|------|-------|----------|------|--------------------------------------|
| <a href="#">356</a>  | 439.21   | 876.41   | 876.41   | -1.58 | 0    | 51    | 6.6e-005 | 1    | K.MVDVGGQR.S <a href="#">355</a>     |
| <a href="#">1316</a> | 529.32   | 1056.62  | 1056.62  | 0.47  | 0    | 73    | 2.5e-007 | 1    | K.ILLLAGEGSGK.S <a href="#">1317</a> |
| <a href="#">1646</a> | 561.31   | 1120.61  | 1120.60  | 3.04  | 1    | 6     |          | 2    | - .MSGVVRTLSR.C                      |

|                                                                         |                              |              |                    |                     |             |          |      |                                                                                                    |
|-------------------------------------------------------------------------|------------------------------|--------------|--------------------|---------------------|-------------|----------|------|----------------------------------------------------------------------------------------------------|
| 159.                                                                    | <a href="#">CTL2_HUMAN</a>   | Mass: 81610  | Score: 169         | Queries matched: 9  | emPAI: 0.14 |          |      |                                                                                                    |
| Choline transporter-like protein 2 OS=Homo sapiens GN=SLC44A2 PE=1 SV=3 |                              |              |                    |                     |             |          |      |                                                                                                    |
| Query                                                                   | Observed                     | Mr(expt)     | Mr(calc)           | ppm                 | Miss Score  | Expect   | Rank | Peptide                                                                                            |
| <a href="#">121</a>                                                     | 413.18                       | 824.34       | 824.35             | -5.29               | 0 35        | 0.00047  | 1    | R.GEFCGQK.G <a href="#">122</a> <a href="#">123</a> <a href="#">124</a>                            |
| <a href="#">733</a>                                                     | 475.75                       | 949.49       | 949.49             | 5.48                | 0 21        | 0.09     | 1    | K.VIYPTDSR.G <a href="#">732</a>                                                                   |
| <a href="#">751</a>                                                     | 479.28                       | 956.54       | 956.54             | -0.04               | 1 13        | 0.35     | 7    | K.KANGVLEAR.Q                                                                                      |
| <a href="#">3059</a>                                                    | 699.33                       | 1396.64      | 1396.63            | 2.24                | 0 66        | 1.2e-006 | 1    | K.IFDDSPCFPTAK.T                                                                                   |
| <a href="#">3790</a>                                                    | 813.35                       | 1624.68      | 1624.68            | -1.99               | 0 64        | 7.5e-007 | 1    | K.TCNPETFPSSNESR.Q                                                                                 |
| 160.                                                                    | <a href="#">DOP2_HUMAN</a>   | Mass: 260348 | Score: 169         | Queries matched: 7  | emPAI: 0.03 |          |      |                                                                                                    |
| Protein dopey-2 OS=Homo sapiens GN=DOPEY2 PE=1 SV=5                     |                              |              |                    |                     |             |          |      |                                                                                                    |
| Query                                                                   | Observed                     | Mr(expt)     | Mr(calc)           | ppm                 | Miss Score  | Expect   | Rank | Peptide                                                                                            |
| <a href="#">563</a>                                                     | 456.74                       | 911.46       | 911.46             | -2.81               | 0 4         | 2        | 8    | R.SYSSVIEK.A                                                                                       |
| <a href="#">1133</a>                                                    | 516.28                       | 1030.55      | 1030.54            | 3.03                | 1 5         | 2.9      | 9    | K.EPEKYPLR.G                                                                                       |
| <a href="#">1702</a>                                                    | 566.77                       | 1131.53      | 1131.53            | 0.35                | 0 38        | 0.0009   | 1    | K.TMAAGDPANLR.N <a href="#">1703</a> <a href="#">1704</a>                                          |
| <a href="#">2928</a>                                                    | 681.81                       | 1361.61      | 1361.61            | 1.92                | 0 87        | 7.3e-009 | 1    | K.SSESPSSSPSPAR.K <a href="#">2929</a>                                                             |
| 161.                                                                    | <a href="#">PLSL_HUMAN</a>   | Mass: 70814  | Score: 166         | Queries matched: 10 | emPAI: 0.29 |          |      |                                                                                                    |
| Plastin-2 OS=Homo sapiens GN=LCP1 PE=1 SV=6                             |                              |              |                    |                     |             |          |      |                                                                                                    |
| Query                                                                   | Observed                     | Mr(expt)     | Mr(calc)           | ppm                 | Miss Score  | Expect   | Rank | Peptide                                                                                            |
| <a href="#">1482</a>                                                    | 545.23                       | 1088.46      | 1088.46            | -0.22               | 0 40        | 0.00016  | 1    | K.ALENDPDCR.H <a href="#">1483</a>                                                                 |
| <a href="#">1732</a>                                                    | 568.31                       | 1134.61      | 1134.60            | 4.21                | 0 31        | 0.0065   | 1    | R.QFVATDVVR.G                                                                                      |
| <a href="#">2369</a>                                                    | 626.27                       | 1250.53      | 1250.54            | -2.95               | 0 2         | 1.5      | 4    | R.AECMLQAER.L                                                                                      |
| <a href="#">3120</a>                                                    | 707.80                       | 1413.58      | 1413.58            | 5.69                | 0 16        | 0.024    | 1    | R.GSVSDEEMMELR.E <a href="#">3119</a> <a href="#">3123</a>                                         |
| <a href="#">3412</a>                                                    | 751.88                       | 1501.75      | 1501.74            | 1.12                | 0 31        | 0.0072   | 1    | K.MINLSVPTIDER.T                                                                                   |
| <a href="#">3678</a>                                                    | 793.42                       | 1584.83      | 1584.84            | -6.14               | 0 61        | 4.3e-006 | 1    | R.VYALPEDLVEVNP.K <a href="#">3679</a>                                                             |
| 162.                                                                    | <a href="#">HCK_HUMAN</a>    | Mass: 60075  | Score: 166         | Queries matched: 6  | emPAI: 0.06 |          |      |                                                                                                    |
| Tyrosine-protein kinase HCK OS=Homo sapiens GN=HCK PE=1 SV=5            |                              |              |                    |                     |             |          |      |                                                                                                    |
| Query                                                                   | Observed                     | Mr(expt)     | Mr(calc)           | ppm                 | Miss Score  | Expect   | Rank | Peptide                                                                                            |
| <a href="#">398</a>                                                     | 443.72                       | 885.43       | 885.43             | -2.10               | 0 1         | 4.2      | 5    | K.DAWEIPR.E                                                                                        |
| <a href="#">2135</a>                                                    | 605.29                       | 1208.57      | 1208.57            | 6.00                | 0 61        | 5.1e-006 | 1    | R.VIEDNEYTAR.E <a href="#">2131</a> <a href="#">2132</a> <a href="#">2133</a> <a href="#">2136</a> |
| Proteins matching the same set of peptides:                             |                              |              |                    |                     |             |          |      |                                                                                                    |
| <a href="#">LYN_HUMAN</a>                                               | Mass: 58993                  | Score: 166   | Queries matched: 6 |                     |             |          |      |                                                                                                    |
| Tyrosine-protein kinase Lyn OS=Homo sapiens GN=LYN PE=1 SV=3            |                              |              |                    |                     |             |          |      |                                                                                                    |
| 163.                                                                    | <a href="#">FAM84A_HUMAN</a> | Mass: 32870  | Score: 164         | Queries matched: 3  | emPAI: 0.11 |          |      |                                                                                                    |
| Protein FAM84A OS=Homo sapiens GN=FAM84A PE=2 SV=2                      |                              |              |                    |                     |             |          |      |                                                                                                    |
| Query                                                                   | Observed                     | Mr(expt)     | Mr(calc)           | ppm                 | Miss Score  | Expect   | Rank | Peptide                                                                                            |
| <a href="#">3436</a>                                                    | 756.83                       | 1511.65      | 1511.65            | -0.77               | 0 73        | 1.2e-007 | 1    | K.APPGCTPCPEPSR.H <a href="#">3435</a> <a href="#">3437</a>                                        |
| 164.                                                                    | <a href="#">K1C14_HUMAN</a>  | Mass: 51872  | Score: 164         | Queries matched: 4  | emPAI: 0.15 |          |      |                                                                                                    |
| Keratin, type I cytoskeletal 14 OS=Homo sapiens GN=KRT14 PE=1 SV=4      |                              |              |                    |                     |             |          |      |                                                                                                    |
| Query                                                                   | Observed                     | Mr(expt)     | Mr(calc)           | ppm                 | Miss Score  | Expect   | Rank | Peptide                                                                                            |
| <a href="#">1566</a>                                                    | 553.77                       | 1105.52      | 1105.52            | 0.27                | 0 65        | 2.2e-006 | 1    | K.VTMQNLNDR.L <a href="#">1567</a>                                                                 |
| <a href="#">2924</a>                                                    | 681.35                       | 1360.68      | 1360.68            | -5.09               | 0 11        | 0.6      | 2    | R.EVATNSELVQSGK.S                                                                                  |
| <a href="#">3147</a>                                                    | 713.35                       | 1424.69      | 1424.69            | -2.84               | 0 76        | 1.9e-007 | 1    | R.APSTYGGGLSVSSSR.F                                                                                |
| 165.                                                                    | <a href="#">PTGR1_HUMAN</a>  | Mass: 36075  | Score: 163         | Queries matched: 4  | emPAI: 0.22 |          |      |                                                                                                    |
| Prostaglandin reductase 1 OS=Homo sapiens GN=PTGR1 PE=1 SV=2            |                              |              |                    |                     |             |          |      |                                                                                                    |
| Query                                                                   | Observed                     | Mr(expt)     | Mr(calc)           | ppm                 | Miss Score  | Expect   | Rank | Peptide                                                                                            |

|                                                                                                        |                             |             |            |                    |             |      |       |          |      |                            |                      |                      |
|--------------------------------------------------------------------------------------------------------|-----------------------------|-------------|------------|--------------------|-------------|------|-------|----------|------|----------------------------|----------------------|----------------------|
|                                                                                                        | <a href="#">2601</a>        | 647.79      | 1293.57    | 1293.57            | 1.78        | 0    | 63    | 2e-006   | 1    | K.EGDTMMGQVAK.V            | <a href="#">2602</a> | <a href="#">2603</a> |
|                                                                                                        | <a href="#">2676</a>        | 655.79      | 1309.57    | 1309.56            | 2.85        | 0    | (51)  | 2.4e-005 | 1    | K.EGDTMMGQVAK.V            |                      |                      |
| <hr/>                                                                                                  |                             |             |            |                    |             |      |       |          |      |                            |                      |                      |
| 166.                                                                                                   | <a href="#">GBG12_HUMAN</a> | Mass: 8115  | Score: 160 | Queries matched: 3 | emPAI: 0.51 |      |       |          |      |                            |                      |                      |
| Guanine nucleotide-binding protein G(I)/G(S)/G(O) subunit gamma-12 OS=Homo sapiens GN=GNG12 PE=1 SV=3  |                             |             |            |                    |             |      |       |          |      |                            |                      |                      |
|                                                                                                        | Query                       | Observed    | Mr(expt)   | Mr(calc)           | ppm         | Miss | Score | Expect   | Rank | Peptide                    |                      |                      |
|                                                                                                        | <a href="#">1802</a>        | 573.80      | 1145.58    | 1145.58            | -0.89       | 0    | 70    | 9.5e-007 | 1    | K.TASTNNIAQAR.R            | <a href="#">1801</a> | <a href="#">1803</a> |
| <hr/>                                                                                                  |                             |             |            |                    |             |      |       |          |      |                            |                      |                      |
| 167.                                                                                                   | <a href="#">RAB5C_HUMAN</a> | Mass: 23696 | Score: 160 | Queries matched: 7 | emPAI: 0.35 |      |       |          |      |                            |                      |                      |
| Ras-related protein Rab-5C OS=Homo sapiens GN=RAB5C PE=1 SV=2                                          |                             |             |            |                    |             |      |       |          |      |                            |                      |                      |
|                                                                                                        | Query                       | Observed    | Mr(expt)   | Mr(calc)           | ppm         | Miss | Score | Expect   | Rank | Peptide                    |                      |                      |
|                                                                                                        | <a href="#">2147</a>        | 606.29      | 1210.57    | 1210.57            | -0.49       | 0    | 44    | 0.00024  | 1    | K.NEPQATGAPGR.N            | <a href="#">2148</a> | <a href="#">2149</a> |
|                                                                                                        | <a href="#">2635</a>        | 650.31      | 1298.62    | 1298.62            | -4.92       | 0    | 62    | 2.9e-006 | 1    | R.GVDLQENNPASR.S           | <a href="#">2634</a> | <a href="#">2636</a> |
| <hr/>                                                                                                  |                             |             |            |                    |             |      |       |          |      |                            |                      |                      |
| 168.                                                                                                   | <a href="#">PACN3_HUMAN</a> | Mass: 48799 | Score: 159 | Queries matched: 4 | emPAI: 0.16 |      |       |          |      |                            |                      |                      |
| Protein kinase C and casein kinase substrate in neurons protein 3 OS=Homo sapiens GN=PACSIN3 PE=1 SV=2 |                             |             |            |                    |             |      |       |          |      |                            |                      |                      |
|                                                                                                        | Query                       | Observed    | Mr(expt)   | Mr(calc)           | ppm         | Miss | Score | Expect   | Rank | Peptide                    |                      |                      |
|                                                                                                        | <a href="#">646</a>         | 466.72      | 931.44     | 931.44             | -0.81       | 0    | 56    | 1.4e-005 | 1    | K.LQGQDSEK.V               |                      |                      |
|                                                                                                        | <a href="#">2106</a>        | 602.30      | 1202.59    | 1202.59            | 0.59        | 0    | 80    | 1.1e-007 | 1    | K.ADSAVSQEQLR.K            | <a href="#">2105</a> |                      |
|                                                                                                        | <a href="#">2771</a>        | 666.35      | 1330.68    | 1330.68            | -5.79       | 1    | 14    | 0.37     | 2    | K.ADSAVSQEQLRK.L           |                      |                      |
| <hr/>                                                                                                  |                             |             |            |                    |             |      |       |          |      |                            |                      |                      |
| 169.                                                                                                   | <a href="#">PHP14_HUMAN</a> | Mass: 13995 | Score: 158 | Queries matched: 2 | emPAI: 0.28 |      |       |          |      |                            |                      |                      |
| 14 kDa phosphohistidine phosphatase OS=Homo sapiens GN=PHPT1 PE=1 SV=1                                 |                             |             |            |                    |             |      |       |          |      |                            |                      |                      |
|                                                                                                        | Query                       | Observed    | Mr(expt)   | Mr(calc)           | ppm         | Miss | Score | Expect   | Rank | Peptide                    |                      |                      |
|                                                                                                        | <a href="#">2948</a>        | 684.76      | 1367.50    | 1367.50            | -0.53       | 0    | 91    | 8.2e-010 | 1    | K.QGCDECLGGGR.I            | <a href="#">2949</a> |                      |
| <hr/>                                                                                                  |                             |             |            |                    |             |      |       |          |      |                            |                      |                      |
| 170.                                                                                                   | <a href="#">LAMP1_HUMAN</a> | Mass: 45367 | Score: 156 | Queries matched: 4 | emPAI: 0.17 |      |       |          |      |                            |                      |                      |
| Lysosome-associated membrane glycoprotein 1 OS=Homo sapiens GN=LAMP1 PE=1 SV=3                         |                             |             |            |                    |             |      |       |          |      |                            |                      |                      |
|                                                                                                        | Query                       | Observed    | Mr(expt)   | Mr(calc)           | ppm         | Miss | Score | Expect   | Rank | Peptide                    |                      |                      |
|                                                                                                        | <a href="#">1154</a>        | 517.28      | 1032.55    | 1032.55            | 6.39        | 0    | 61    | 6e-006   | 1    | K.TVESITDIR.A              | <a href="#">1153</a> |                      |
|                                                                                                        | <a href="#">1839</a>        | 576.31      | 1150.60    | 1150.60            | 3.94        | 0    | 66    | 2.3e-006 | 1    | R.ALQATVGNSYK.C            | <a href="#">1836</a> |                      |
| <hr/>                                                                                                  |                             |             |            |                    |             |      |       |          |      |                            |                      |                      |
| 171.                                                                                                   | <a href="#">TSN9_HUMAN</a>  | Mass: 27559 | Score: 156 | Queries matched: 2 | emPAI: 0.14 |      |       |          |      |                            |                      |                      |
| Tetraspanin-9 OS=Homo sapiens GN=TSPAN9 PE=1 SV=1                                                      |                             |             |            |                    |             |      |       |          |      |                            |                      |                      |
|                                                                                                        | Query                       | Observed    | Mr(expt)   | Mr(calc)           | ppm         | Miss | Score | Expect   | Rank | Peptide                    |                      |                      |
|                                                                                                        | <a href="#">2896</a>        | 679.74      | 1357.46    | 1357.46            | 0.68        | 0    | 91    | 8.3e-010 | 1    | R.CCMENSQCGGR.N            | <a href="#">2895</a> |                      |
| <hr/>                                                                                                  |                             |             |            |                    |             |      |       |          |      |                            |                      |                      |
| 172.                                                                                                   | <a href="#">GBB1_HUMAN</a>  | Mass: 38151 | Score: 155 | Queries matched: 4 | emPAI: 0.33 |      |       |          |      |                            |                      |                      |
| Guanine nucleotide-binding protein G(I)/G(S)/G(T) subunit beta-1 OS=Homo sapiens GN=GNB1 PE=1 SV=3     |                             |             |            |                    |             |      |       |          |      |                            |                      |                      |
|                                                                                                        | Query                       | Observed    | Mr(expt)   | Mr(calc)           | ppm         | Miss | Score | Expect   | Rank | Peptide                    |                      |                      |
|                                                                                                        | <a href="#">26</a>          | 402.73      | 803.44     | 803.44             | -5.61       | 1    | 6     | 3.6      | 4    | R.IQMRTR.R                 |                      |                      |
|                                                                                                        | <a href="#">1043</a>        | 505.26      | 1008.51    | 1008.51            | -0.53       | 0    | 56    | 1.7e-005 | 1    | R.AGVLAGHDNR.V             |                      |                      |
|                                                                                                        | <a href="#">1078</a>        | 509.29      | 1016.56    | 1016.55            | 7.85        | 0    | 69    | 1e-006   | 1    | R.LLVASQDGK.L              |                      |                      |
|                                                                                                        | <a href="#">2222</a>        | 613.30      | 1224.59    | 1224.58            | 9.90        | 0    | 72    | 4.7e-007 | 1    | R.LFVSGACDASAK.L           |                      |                      |
| <hr/>                                                                                                  |                             |             |            |                    |             |      |       |          |      |                            |                      |                      |
| 173.                                                                                                   | <a href="#">KPYM_HUMAN</a>  | Mass: 58470 | Score: 155 | Queries matched: 4 | emPAI: 0.13 |      |       |          |      |                            |                      |                      |
| Pyruvate kinase isozymes M1/M2 OS=Homo sapiens GN=PKM PE=1 SV=4                                        |                             |             |            |                    |             |      |       |          |      |                            |                      |                      |
|                                                                                                        | Query                       | Observed    | Mr(expt)   | Mr(calc)           | ppm         | Miss | Score | Expect   | Rank | Peptide                    |                      |                      |
|                                                                                                        | <a href="#">922</a>         | 495.76      | 989.50     | 989.50             | 0.53        | 0    | 71    | 8.1e-007 | 1    | K.GSGTAEVELK.K             | <a href="#">921</a>  | <a href="#">924</a>  |
|                                                                                                        | <a href="#">4859</a>        | 1088.07     | 2174.12    | 2174.11            | 3.60        | 0    | 66    | 1.2e-006 | 1    | R.LAPITSDPTEATAVGAVEASFK.C |                      |                      |

174. [EZRI\\_HUMAN](#) Mass: 69484 Score: 155 Queries matched: 17 emPAI: 0.37

Ezrin OS=Homo sapiens GN=EZR PE=1 SV=4

| Query                | Observed | Mr(expt) | Mr(calc) | ppm   | Miss | Score | Expect   | Rank | Peptide                                                                                      |
|----------------------|----------|----------|----------|-------|------|-------|----------|------|----------------------------------------------------------------------------------------------|
| <a href="#">9</a>    | 401.23   | 800.44   | 800.44   | 0.81  | 0    | 35    | 0.0023   | 1    | R.QAVDQIK.S <a href="#">7</a> <a href="#">8</a> <a href="#">10</a> <a href="#">11</a>        |
| <a href="#">243</a>  | 424.68   | 847.34   | 847.35   | -4.75 | 0    | 15    | 0.034    | 1    | R.DQWEDR.I                                                                                   |
| <a href="#">354</a>  | 438.23   | 874.44   | 874.44   | -0.32 | 0    | 38    | 0.0013   | 1    | R.QQLETEK.K                                                                                  |
| <a href="#">466</a>  | 449.72   | 897.43   | 897.42   | 8.88  | 0    | 36    | 0.0014   | 1    | K.SGYLSSER.L                                                                                 |
| <a href="#">798</a>  | 483.26   | 964.50   | 964.50   | -0.63 | 1    | 20    | 0.079    | 1    | R.NISFNDKK.F                                                                                 |
| <a href="#">995</a>  | 501.77   | 1001.52  | 1001.51  | 1.70  | 0    | 15    | 0.35     | 2    | R.ELSEQIQR.A <a href="#">985</a> <a href="#">986</a> <a href="#">988</a> <a href="#">993</a> |
| <a href="#">1004</a> | 502.29   | 1002.56  | 1002.55  | 7.89  | 1    | 38    | 0.001    | 1    | R.KENPLQFK.F <a href="#">1003</a>                                                            |
| <a href="#">2012</a> | 591.80   | 1181.59  | 1181.59  | -0.67 | 0    | 71    | 4.8e-007 | 1    | K.APDFVIFYAPR.L                                                                              |

175. [SERC5\\_HUMAN](#) Mass: 48574 Score: 153 Queries matched: 4 emPAI: 0.16

Serine incorporator 5 OS=Homo sapiens GN=SERINC5 PE=2 SV=1

| Query                | Observed | Mr(expt) | Mr(calc) | ppm  | Miss | Score | Expect   | Rank | Peptide                                               |
|----------------------|----------|----------|----------|------|------|-------|----------|------|-------------------------------------------------------|
| <a href="#">592</a>  | 460.73   | 919.44   | 919.44   | 0.11 | 0    | 71    | 5.4e-007 | 1    | R.SSSDALQGR.Y <a href="#">591</a> <a href="#">593</a> |
| <a href="#">1710</a> | 566.80   | 1131.59  | 1131.59  | 0.11 | 0    | 62    | 5.9e-006 | 1    | R.YAAPELEIAR.C                                        |

176. [STAT3\\_HUMAN](#) Mass: 88810 Score: 152 Queries matched: 3 emPAI: 0.04

Signal transducer and activator of transcription 3 OS=Homo sapiens GN=STAT3 PE=1 SV=2

| Query                | Observed | Mr(expt) | Mr(calc) | ppm  | Miss | Score | Expect   | Rank | Peptide                                  |
|----------------------|----------|----------|----------|------|------|-------|----------|------|------------------------------------------|
| <a href="#">1840</a> | 576.31   | 1150.61  | 1150.60  | 8.73 | 0    | 7     | 1.6      | 3    | K.FPELNLYQLK.I                           |
| <a href="#">4409</a> | 932.42   | 1862.82  | 1862.82  | 0.27 | 0    | 126   | 5.4e-013 | 1    | K.SQGDMDLNGNNSVTR.Q <a href="#">4407</a> |

177. [RAB3C\\_HUMAN](#) Score: 151 Queries matched: 5

Ras-related protein Rab-3C OS=Homo sapiens GN=RAB3C PE=2 SV=1

| Query                | Observed | Mr(expt) | Mr(calc) | ppm  | Miss | Score | Expect   | Rank | Peptide                              |
|----------------------|----------|----------|----------|------|------|-------|----------|------|--------------------------------------|
| <a href="#">848</a>  | 488.26   | 974.51   | 974.51   | 0.68 | 0    | 21    | 0.082    | 2    | R.LVDIICDK.M <a href="#">849</a>     |
| <a href="#">1538</a> | 550.84   | 1099.66  | 1099.66  | 3.69 | 0    | 68    | 5.1e-007 | 1    | K.LLIIGNSSVGK.T <a href="#">1537</a> |
| <a href="#">2701</a> | 658.83   | 1315.65  | 1315.65  | 1.50 | 0    | 74    | 3.2e-007 | 1    | K.LQIWDTAGQER.Y                      |

178. [WDR48\\_HUMAN](#) Mass: 77018 Score: 151 Queries matched: 2 emPAI: 0.05

WD repeat-containing protein 48 OS=Homo sapiens GN=WDR48 PE=1 SV=1

| Query                | Observed | Mr(expt) | Mr(calc) | ppm  | Miss | Score | Expect   | Rank | Peptide                                  |
|----------------------|----------|----------|----------|------|------|-------|----------|------|------------------------------------------|
| <a href="#">3581</a> | 777.35   | 1552.68  | 1552.68  | 0.26 | 0    | 89    | 4.1e-009 | 1    | R.DGTQCLSGSSDGTIR.L <a href="#">3580</a> |

179. [CD47\\_HUMAN](#) Mass: 35590 Score: 150 Queries matched: 7 emPAI: 0.11

Leukocyte surface antigen CD47 OS=Homo sapiens GN=CD47 PE=1 SV=1

| Query                | Observed | Mr(expt) | Mr(calc) | ppm  | Miss | Score | Expect   | Rank | Peptide                                                                                                                  |
|----------------------|----------|----------|----------|------|------|-------|----------|------|--------------------------------------------------------------------------------------------------------------------------|
| <a href="#">641</a>  | 465.29   | 928.56   | 928.56   | 3.01 | 0    | 20    | 0.054    | 1    | K.IEVSQLLK.G                                                                                                             |
| <a href="#">1762</a> | 570.28   | 1138.55  | 1138.55  | 3.01 | 0    | 55    | 1.9e-005 | 1    | K.STVPTDFSSAK.I <a href="#">1757</a> <a href="#">1759</a> <a href="#">1760</a> <a href="#">1763</a> <a href="#">1764</a> |

180. [GMPPA\\_HUMAN](#) Mass: 46604 Score: 149 Queries matched: 5 emPAI: 0.08

Mannose-1-phosphate guanyltransferase alpha OS=Homo sapiens GN=GMPPA PE=1 SV=1

| Query                | Observed | Mr(expt) | Mr(calc) | ppm   | Miss | Score | Expect | Rank | Peptide                                                                           |
|----------------------|----------|----------|----------|-------|------|-------|--------|------|-----------------------------------------------------------------------------------|
| <a href="#">1234</a> | 523.24   | 1044.47  | 1044.46  | 4.36  | 0    | 5     | 1      | 3    | R.YQDTHPER.L                                                                      |
| <a href="#">3381</a> | 747.84   | 1493.67  | 1493.67  | -0.16 | 0    | 58    | 6e-006 | 1    | R.VEGTPSDPNFNDPR.A <a href="#">3380</a> <a href="#">3382</a> <a href="#">3384</a> |

181. [ANXA4\\_HUMAN](#) Mass: 36088 Score: 146 Queries matched: 3 emPAI: 0.10

Annexin A4 OS=Homo sapiens GN=ANXA4 PE=1 SV=4

| Query | Observed | Mr(expt) | Mr(calc) | ppm | Miss | Score | Expect | Rank | Peptide |
|-------|----------|----------|----------|-----|------|-------|--------|------|---------|
|-------|----------|----------|----------|-----|------|-------|--------|------|---------|

[2964](#)    **686.34**    **1370.66**    **1370.66**    **3.79**    **0**    **70**    **5.7e-007**    **1**    **R.ISQTYQQYGR.S** [2963](#) [2965](#)

182. [S26A3\\_HUMAN](#)    **Mass:** 85021    **Score:** 145    **Queries matched:** 3    **emPAI:** 0.09

Chloride anion exchanger OS=Homo sapiens GN=SLC26A3 PE=1 SV=1

| Query               | Observed | Mr(expt) | Mr(calc) | ppm   | Miss | Score | Expect   | Rank | Peptide                           |
|---------------------|----------|----------|----------|-------|------|-------|----------|------|-----------------------------------|
| <a href="#">894</a> | 492.30   | 982.58   | 982.58   | -1.53 | 0    | 69    | 3.4e-007 | 1    | K.QGLLQVTFK.G <a href="#">896</a> |
| <a href="#">935</a> | 496.25   | 990.49   | 990.49   | 0.14  | 0    | 53    | 3.3e-005 | 1    | K.CSTLANIGR.T                     |

183. [LY6K\\_HUMAN](#)    **Mass:** 19288    **Score:** 144    **Queries matched:** 4    **emPAI:** 0.20

Lymphocyte antigen 6K OS=Homo sapiens GN=LY6K PE=1 SV=2

| Query                | Observed | Mr(expt) | Mr(calc) | ppm   | Miss | Score | Expect   | Rank | Peptide                                                                      |
|----------------------|----------|----------|----------|-------|------|-------|----------|------|------------------------------------------------------------------------------|
| <a href="#">2597</a> | 647.77   | 1293.53  | 1293.54  | -6.07 | 0    | 53    | 5.1e-006 | 1    | R.ENTFECQNP.R <a href="#">2598</a> <a href="#">2599</a> <a href="#">2600</a> |

184. [POTEE\\_HUMAN](#)    **Mass:** 122882    **Score:** 143    **Queries matched:** 5    **emPAI:** 0.03

POTE ankyrin domain family member E OS=Homo sapiens GN=POTEE PE=1 SV=3

| Query                | Observed | Mr(expt) | Mr(calc) | ppm  | Miss | Score | Expect   | Rank | Peptide                                                 |
|----------------------|----------|----------|----------|------|------|-------|----------|------|---------------------------------------------------------|
| <a href="#">853</a>  | 488.73   | 975.44   | 975.44   | 2.57 | 0    | 85    | 1.6e-008 | 1    | K.AGFAGDDAPR.A <a href="#">852</a>                      |
| <a href="#">1575</a> | 554.27   | 1106.53  | 1106.53  | 5.13 | 0    | 12    | 0.47     | 2    | K.MSQELEINK.D <a href="#">1576</a> <a href="#">1578</a> |

185. [DHAK\\_HUMAN](#)    **Mass:** 59252    **Score:** 140    **Queries matched:** 3    **emPAI:** 0.13

Bifunctional ATP-dependent dihydroxyacetone kinase/FAD-AMP lyase (cyclizing) OS=Homo sapiens GN=DAK PE=1 SV=2

| Query                | Observed | Mr(expt) | Mr(calc) | ppm  | Miss | Score | Expect   | Rank | Peptide                                       |
|----------------------|----------|----------|----------|------|------|-------|----------|------|-----------------------------------------------|
| <a href="#">723</a>  | 474.74   | 947.46   | 947.46   | 0.92 | 0    | 60    | 7.7e-006 | 1    | K.SAEAAEATK.N                                 |
| <a href="#">4502</a> | 970.96   | 1939.91  | 1939.91  | 0.77 | 0    | 74    | 2.5e-007 | 1    | R.VAPAEPEAPDSTAAGGSASK.R <a href="#">4503</a> |

186. [G3P\\_HUMAN](#)    **Mass:** 36201    **Score:** 138    **Queries matched:** 7    **emPAI:** 0.22

Glyceraldehyde-3-phosphate dehydrogenase OS=Homo sapiens GN=GAPDH PE=1 SV=3

| Query                | Observed | Mr(expt) | Mr(calc) | ppm   | Miss | Score | Expect | Rank | Peptide                                                                                      |
|----------------------|----------|----------|----------|-------|------|-------|--------|------|----------------------------------------------------------------------------------------------|
| <a href="#">28</a>   | 403.22   | 804.42   | 804.42   | -9.52 | 0    | 2     | 9.1    | 1    | K.VGVNGFGR.I                                                                                 |
| <a href="#">138</a>  | 415.22   | 828.43   | 828.43   | -0.95 | 0    | 34    | 0.0023 | 1    | K.QASEGPLK.G <a href="#">136</a> <a href="#">139</a> <a href="#">140</a> <a href="#">142</a> |
| <a href="#">4372</a> | 917.47   | 1832.92  | 1832.91  | 2.74  | 0    | 115   | 2e-011 | 1    | K.IISNASCTTNCLAPLAK.V                                                                        |

187. [LRC47\\_HUMAN](#)    **Mass:** 64004    **Score:** 138    **Queries matched:** 3    **emPAI:** 0.06

Leucine-rich repeat-containing protein 47 OS=Homo sapiens GN=LRR47 PE=1 SV=1

| Query                | Observed | Mr(expt) | Mr(calc) | ppm   | Miss | Score | Expect   | Rank | Peptide                                 |
|----------------------|----------|----------|----------|-------|------|-------|----------|------|-----------------------------------------|
| <a href="#">1859</a> | 577.33   | 1152.65  | 1152.66  | -6.67 | 1    | 8     | 0.53     | 3    | R.LRELPADLAR.C                          |
| <a href="#">3365</a> | 745.81   | 1489.60  | 1489.59  | 7.82  | 0    | 82    | 6.3e-009 | 1    | R.EGGDGEEQVDGAGR.L <a href="#">3364</a> |

188. [GSTO1\\_HUMAN](#)    **Mass:** 27833    **Score:** 137    **Queries matched:** 4    **emPAI:** 0.14

Glutathione S-transferase omega-1 OS=Homo sapiens GN=GSTO1 PE=1 SV=2

| Query                | Observed | Mr(expt) | Mr(calc) | ppm   | Miss | Score | Expect   | Rank | Peptide                                                                           |
|----------------------|----------|----------|----------|-------|------|-------|----------|------|-----------------------------------------------------------------------------------|
| <a href="#">2712</a> | 660.85   | 1319.68  | 1319.68  | -0.96 | 0    | 62    | 6.2e-006 | 1    | K.GSAPPGVPVEGSIR.I <a href="#">2711</a> <a href="#">2713</a> <a href="#">2714</a> |

189. [CD59\\_HUMAN](#)    **Mass:** 14795    **Score:** 137    **Queries matched:** 3    **emPAI:** 0.60

CD59 glycoprotein OS=Homo sapiens GN=CD59 PE=1 SV=1

| Query                | Observed | Mr(expt) | Mr(calc) | ppm  | Miss | Score | Expect   | Rank | Peptide                          |
|----------------------|----------|----------|----------|------|------|-------|----------|------|----------------------------------|
| <a href="#">440</a>  | 446.75   | 891.49   | 891.48   | 6.60 | 0    | 63    | 4.6e-006 | 1    | K.AGLQVYNK.C <a href="#">439</a> |
| <a href="#">2996</a> | 690.29   | 1378.56  | 1378.55  | 4.08 | 0    | 51    | 9.5e-006 | 1    | R.ENELTYYCCK.K                   |

190. [NPT2B\\_HUMAN](#)    **Mass:** 77363    **Score:** 137    **Queries matched:** 7    **emPAI:** 0.05

| Query                                                                                                         | Observed                    | Mr(expt)    | Mr(calc)   | ppm                | Miss        | Score | Expect   | Rank | Peptide                                                                                                                        |
|---------------------------------------------------------------------------------------------------------------|-----------------------------|-------------|------------|--------------------|-------------|-------|----------|------|--------------------------------------------------------------------------------------------------------------------------------|
| Sodium-dependent phosphate transport protein 2B OS=Homo sapiens GN=SLC34A2 PE=1 SV=3                          |                             |             |            |                    |             |       |          |      |                                                                                                                                |
| <a href="#">2440</a>                                                                                          | 632.31                      | 1262.61     | 1262.62    | -8.01              | 0           | 1     | 6.3      | 3    | K.VISQIAMNDEK.A                                                                                                                |
| <a href="#">3542</a>                                                                                          | 773.38                      | 1544.75     | 1544.75    | 2.20               | 0           | 2     | 4.8      | 1    | K.YLEGAAGQOPTAPDK.S                                                                                                            |
| <a href="#">4442</a>                                                                                          | 946.93                      | 1891.84     | 1891.85    | -5.43              | 1           | 55    | 8.5e-006 | 1    | R.EAQGEVPASDSKTECTAL.- <a href="#">4443</a> <a href="#">4444</a> <a href="#">4445</a> <a href="#">4446</a>                     |
| <hr/>                                                                                                         |                             |             |            |                    |             |       |          |      |                                                                                                                                |
| 191.                                                                                                          | <a href="#">LDHA_HUMAN</a>  | Mass: 36950 | Score: 134 | Queries matched: 5 | emPAI: 0.21 |       |          |      |                                                                                                                                |
| L-lactate dehydrogenase A chain OS=Homo sapiens GN=LDHA PE=1 SV=2                                             |                             |             |            |                    |             |       |          |      |                                                                                                                                |
| Query                                                                                                         | Observed                    | Mr(expt)    | Mr(calc)   | ppm                | Miss        | Score | Expect   | Rank | Peptide                                                                                                                        |
| <a href="#">1631</a>                                                                                          | 559.80                      | 1117.58     | 1117.58    | 0.65               | 0           | 5     | 2.9      | 1    | K.SADTLWGIQK.E                                                                                                                 |
| <a href="#">1729</a>                                                                                          | 567.79                      | 1133.56     | 1133.56    | 0.61               | 0           | 41    | 0.00079  | 1    | K.VTLTSEEER.L                                                                                                                  |
| <a href="#">2354</a>                                                                                          | 624.81                      | 1247.60     | 1247.59    | 5.12               | 0           | 68    | 1.1e-006 | 1    | R.VIGSGCNLDSAR.F <a href="#">2352</a> <a href="#">2353</a>                                                                     |
| <hr/>                                                                                                         |                             |             |            |                    |             |       |          |      |                                                                                                                                |
| 192.                                                                                                          | <a href="#">PIP_HUMAN</a>   | Mass: 16847 | Score: 133 | Queries matched: 2 | emPAI: 0.23 |       |          |      |                                                                                                                                |
| Prolactin-inducible protein OS=Homo sapiens GN=PIP PE=1 SV=1                                                  |                             |             |            |                    |             |       |          |      |                                                                                                                                |
| Query                                                                                                         | Observed                    | Mr(expt)    | Mr(calc)   | ppm                | Miss        | Score | Expect   | Rank | Peptide                                                                                                                        |
| <a href="#">2890</a>                                                                                          | 678.78                      | 1355.54     | 1355.55    | -3.62              | 0           | 75    | 3.4e-008 | 1    | K.YTACLCDNPK.T <a href="#">2891</a>                                                                                            |
| <hr/>                                                                                                         |                             |             |            |                    |             |       |          |      |                                                                                                                                |
| 193.                                                                                                          | <a href="#">WFDC2_HUMAN</a> | Mass: 13953 | Score: 132 | Queries matched: 2 | emPAI: 0.28 |       |          |      |                                                                                                                                |
| WAP four-disulfide core domain protein 2 OS=Homo sapiens GN=WFDC2 PE=1 SV=2                                   |                             |             |            |                    |             |       |          |      |                                                                                                                                |
| Query                                                                                                         | Observed                    | Mr(expt)    | Mr(calc)   | ppm                | Miss        | Score | Expect   | Rank | Peptide                                                                                                                        |
| <a href="#">3939</a>                                                                                          | 840.84                      | 1679.66     | 1679.67    | -3.74              | 0           | 77    | 1.8e-008 | 1    | R.DQCQVDSQCPGQMK.C <a href="#">3940</a>                                                                                        |
| <hr/>                                                                                                         |                             |             |            |                    |             |       |          |      |                                                                                                                                |
| 194.                                                                                                          | <a href="#">CC50A_HUMAN</a> | Mass: 41057 | Score: 130 | Queries matched: 2 | emPAI: 0.19 |       |          |      |                                                                                                                                |
| Cell cycle control protein 50A OS=Homo sapiens GN=TMEM30A PE=1 SV=1                                           |                             |             |            |                    |             |       |          |      |                                                                                                                                |
| Query                                                                                                         | Observed                    | Mr(expt)    | Mr(calc)   | ppm                | Miss        | Score | Expect   | Rank | Peptide                                                                                                                        |
| <a href="#">3401</a>                                                                                          | 500.91                      | 1499.72     | 1499.71    | 2.67               | 1           | 75    | 1.9e-007 | 1    | K.FRNPPGGDNLEER.F                                                                                                              |
| <a href="#">4501</a>                                                                                          | 970.43                      | 1938.85     | 1938.85    | -1.58              | 0           | 73    | 9.9e-008 | 1    | R.EIEIDYGTGTEPSSPCNK.C                                                                                                         |
| <hr/>                                                                                                         |                             |             |            |                    |             |       |          |      |                                                                                                                                |
| 195.                                                                                                          | <a href="#">GDI2_HUMAN</a>  | Mass: 51087 | Score: 130 | Queries matched: 8 | emPAI: 0.15 |       |          |      |                                                                                                                                |
| Rab GDP dissociation inhibitor beta OS=Homo sapiens GN=GDI2 PE=1 SV=2                                         |                             |             |            |                    |             |       |          |      |                                                                                                                                |
| Query                                                                                                         | Observed                    | Mr(expt)    | Mr(calc)   | ppm                | Miss        | Score | Expect   | Rank | Peptide                                                                                                                        |
| <a href="#">2004</a>                                                                                          | 590.34                      | 1178.67     | 1178.67    | 0.10               | 1           | 5     | 1.3      | 6    | R.IKLYSESLAR.Y                                                                                                                 |
| <a href="#">2937</a>                                                                                          | 683.36                      | 1364.70     | 1364.69    | 5.81               | 0           | 83    | 4.2e-008 | 1    | K.DLGTESQIFISR.T                                                                                                               |
| <a href="#">4874</a>                                                                                          | 1100.04                     | 2198.06     | 2198.05    | 3.60               | 0           | 38    | 0.00098  | 1    | K.NTNDANSCQIIPQNVNR.K <a href="#">4870</a> <a href="#">4871</a> <a href="#">4872</a> <a href="#">4873</a> <a href="#">4875</a> |
| <hr/>                                                                                                         |                             |             |            |                    |             |       |          |      |                                                                                                                                |
| 196.                                                                                                          | <a href="#">CB072_HUMAN</a> | Mass: 30918 | Score: 128 | Queries matched: 2 | emPAI: 0.12 |       |          |      |                                                                                                                                |
| Uncharacterized protein C2orf72 OS=Homo sapiens GN=C2orf72 PE=2 SV=2                                          |                             |             |            |                    |             |       |          |      |                                                                                                                                |
| Query                                                                                                         | Observed                    | Mr(expt)    | Mr(calc)   | ppm                | Miss        | Score | Expect   | Rank | Peptide                                                                                                                        |
| <a href="#">974</a>                                                                                           | 500.27                      | 998.52      | 998.53     | -3.63              | 0           | 84    | 2.4e-008 | 1    | R.AAGAAGAAAAAR.A <a href="#">975</a>                                                                                           |
| <hr/>                                                                                                         |                             |             |            |                    |             |       |          |      |                                                                                                                                |
| 197.                                                                                                          | <a href="#">LELP1_HUMAN</a> | Mass: 11659 | Score: 127 | Queries matched: 6 | emPAI: 0.34 |       |          |      |                                                                                                                                |
| Late cornified envelope-like proline-rich protein 1 OS=Homo sapiens GN=LELP1 PE=2 SV=1                        |                             |             |            |                    |             |       |          |      |                                                                                                                                |
| Query                                                                                                         | Observed                    | Mr(expt)    | Mr(calc)   | ppm                | Miss        | Score | Expect   | Rank | Peptide                                                                                                                        |
| <a href="#">4518</a>                                                                                          | 973.89                      | 1945.76     | 1945.76    | -1.16              | 0           | 59    | 1.3e-006 | 1    | K.CPSSCPHACPPCPPPE.- <a href="#">4513</a> <a href="#">4515</a> <a href="#">4516</a> <a href="#">4517</a> <a href="#">4519</a>  |
| <hr/>                                                                                                         |                             |             |            |                    |             |       |          |      |                                                                                                                                |
| 198.                                                                                                          | <a href="#">FNNTA_HUMAN</a> | Mass: 44495 | Score: 127 | Queries matched: 3 | emPAI: 0.08 |       |          |      |                                                                                                                                |
| Protein farnesyltransferase/geranylgeranyltransferase type-1 subunit alpha OS=Homo sapiens GN=FNNTA PE=1 SV=1 |                             |             |            |                    |             |       |          |      |                                                                                                                                |
| Query                                                                                                         | Observed                    | Mr(expt)    | Mr(calc)   | ppm                | Miss        | Score | Expect   | Rank | Peptide                                                                                                                        |
| <a href="#">3245</a>                                                                                          | 728.82                      | 1455.62     | 1455.62    | 0.02               | 0           | 62    | 1.4e-006 | 1    | K.HSTENDSPTNVQQ.- <a href="#">3243</a> <a href="#">3244</a>                                                                    |

|                                                                                                     |                             |              |                    |                    |             |       |          |      |                                                                                               |
|-----------------------------------------------------------------------------------------------------|-----------------------------|--------------|--------------------|--------------------|-------------|-------|----------|------|-----------------------------------------------------------------------------------------------|
| 199.                                                                                                | <a href="#">HPRT_HUMAN</a>  | Mass: 24792  | Score: 126         | Queries matched: 2 | emPAI: 0.15 |       |          |      |                                                                                               |
| Hypoxanthine-guanine phosphoribosyltransferase OS=Homo sapiens GN=HPRT1 PE=1 SV=2                   |                             |              |                    |                    |             |       |          |      |                                                                                               |
| Query                                                                                               | Observed                    | Mr(expt)     | Mr(calc)           | ppm                | Miss        | Score | Expect   | Rank | Peptide                                                                                       |
| <a href="#">3030</a>                                                                                | 694.29                      | 1386.58      | 1386.57            | 2.08               | 0           | 77    | 2.8e-008 | 1    | <a href="#">K.SYCNQSTGDIK.V</a> <a href="#">3029</a>                                          |
| 200.                                                                                                | <a href="#">CHM2A_HUMAN</a> | Mass: 25088  | Score: 125         | Queries matched: 9 | emPAI: 0.33 |       |          |      |                                                                                               |
| Charged multivesicular body protein 2a OS=Homo sapiens GN=CHMP2A PE=1 SV=1                          |                             |              |                    |                    |             |       |          |      |                                                                                               |
| Query                                                                                               | Observed                    | Mr(expt)     | Mr(calc)           | ppm                | Miss        | Score | Expect   | Rank | Peptide                                                                                       |
| <a href="#">590</a>                                                                                 | 460.72                      | 919.42       | 919.42             | -0.04              | 0           | 51    | 4.5e-005 | 1    | <a href="#">K.QGQMDAVR.I</a>                                                                  |
| <a href="#">1002</a>                                                                                | 502.27                      | 1002.53      | 1002.53            | -5.32              | 1           | 8     | 1.9      | 7    | <a href="#">R.QKLETQEK.K</a>                                                                  |
| <a href="#">1434</a>                                                                                | 541.24                      | 1080.47      | 1080.47            | 0.15               | 0           | 54    | 1.4e-005 | 1    | <a href="#">K.SNNSMAQAMK.G</a> <a href="#">1432</a> <a href="#">1433</a> <a href="#">1435</a> |
| <a href="#">2009</a>                                                                                | 591.29                      | 1180.56      | 1180.57            | -9.88              | 1           | 10    | 0.53     | 2    | <a href="#">K.GVTKAMGTMNR.Q</a> <a href="#">2010</a>                                          |
| <a href="#">3340</a>                                                                                | 741.86                      | 1481.70      | 1481.70            | 2.97               | 1           | 0     | 5.4      | 2    | <a href="#">K.SNNSMAQAMKGVTK.A</a>                                                            |
| 201.                                                                                                | <a href="#">K2C6B_HUMAN</a> | Mass: 60315  | Score: 124         | Queries matched: 6 | emPAI: 0.13 |       |          |      |                                                                                               |
| Keratin, type II cytoskeletal 6B OS=Homo sapiens GN=KRT6B PE=1 SV=5                                 |                             |              |                    |                    |             |       |          |      |                                                                                               |
| Query                                                                                               | Observed                    | Mr(expt)     | Mr(calc)           | ppm                | Miss        | Score | Expect   | Rank | Peptide                                                                                       |
| <a href="#">1376</a>                                                                                | 533.76                      | 1065.51      | 1065.51            | 1.11               | 1           | 14    | 0.33     | 4    | <a href="#">K.YEDEINKR.T</a>                                                                  |
| <a href="#">1576</a>                                                                                | 554.27                      | 1106.53      | 1106.54            | -1.53              | 0           | 51    | 7.1e-005 | 1    | <a href="#">K.AQYEEIAQR.S</a> <a href="#">1575</a> <a href="#">1577</a> <a href="#">1578</a>  |
| <a href="#">1999</a>                                                                                | 590.31                      | 1178.60      | 1178.59            | 3.62               | 0           | 53    | 4.3e-005 | 1    | <a href="#">K.YEELQITAGR.H</a>                                                                |
| 202.                                                                                                | <a href="#">AGM1_HUMAN</a>  | Mass: 60270  | Score: 124         | Queries matched: 5 | emPAI: 0.06 |       |          |      |                                                                                               |
| Phosphoacetylglucosamine mutase OS=Homo sapiens GN=PGM3 PE=1 SV=1                                   |                             |              |                    |                    |             |       |          |      |                                                                                               |
| Query                                                                                               | Observed                    | Mr(expt)     | Mr(calc)           | ppm                | Miss        | Score | Expect   | Rank | Peptide                                                                                       |
| <a href="#">248</a>                                                                                 | 424.73                      | 847.44       | 847.45             | -6.37              | 0           | 8     | 1.6      | 4    | <a href="#">-.MDLGAIWK.Y</a>                                                                  |
| <a href="#">1961</a>                                                                                | 586.73                      | 1171.45      | 1171.46            | -2.70              | 0           | 56    | 2.2e-006 | 1    | <a href="#">K.QASCSDGEYR.S</a> <a href="#">1962</a> <a href="#">1963</a>                      |
| <a href="#">2560</a>                                                                                | 644.84                      | 1287.66      | 1287.67            | -1.64              | 1           | 1     | 6.5      | 7    | <a href="#">K.IKQSAEQLEDK.K</a>                                                               |
| 203.                                                                                                | <a href="#">RAP1A_HUMAN</a> | Mass: 21316  | Score: 123         | Queries matched: 4 | emPAI: 0.64 |       |          |      |                                                                                               |
| Ras-related protein Rap-1A OS=Homo sapiens GN=RAP1A PE=1 SV=1                                       |                             |              |                    |                    |             |       |          |      |                                                                                               |
| Query                                                                                               | Observed                    | Mr(expt)     | Mr(calc)           | ppm                | Miss        | Score | Expect   | Rank | Peptide                                                                                       |
| <a href="#">577</a>                                                                                 | 458.24                      | 914.46       | 914.46             | -0.70              | 0           | 51    | 4.1e-005 | 1    | <a href="#">K.EQGQNLAR.Q</a> <a href="#">578</a>                                              |
| <a href="#">672</a>                                                                                 | 468.69                      | 935.36       | 935.37             | -1.23              | 0           | 56    | 2.7e-006 | 1    | <a href="#">K.CDLEDER.V</a>                                                                   |
| <a href="#">907</a>                                                                                 | 493.31                      | 984.60       | 984.60             | 0.22               | 0           | 28    | 0.0047   | 1    | <a href="#">K.LVVLGSGGVGK.S</a>                                                               |
| Proteins matching the same set of peptides:                                                         |                             |              |                    |                    |             |       |          |      |                                                                                               |
| <a href="#">RAP1B_HUMAN</a>                                                                         | Mass: 21040                 | Score: 123   | Queries matched: 4 |                    |             |       |          |      |                                                                                               |
| Ras-related protein Rap-1b OS=Homo sapiens GN=RAP1B PE=1 SV=1                                       |                             |              |                    |                    |             |       |          |      |                                                                                               |
| 204.                                                                                                | <a href="#">CAMP_HUMAN</a>  | Mass: 19517  | Score: 123         | Queries matched: 3 | emPAI: 0.43 |       |          |      |                                                                                               |
| Cathelicidin antimicrobial peptide OS=Homo sapiens GN=CAMP PE=1 SV=1                                |                             |              |                    |                    |             |       |          |      |                                                                                               |
| Query                                                                                               | Observed                    | Mr(expt)     | Mr(calc)           | ppm                | Miss        | Score | Expect   | Rank | Peptide                                                                                       |
| <a href="#">612</a>                                                                                 | 463.22                      | 924.43       | 924.43             | 0.20               | 0           | 69    | 6.9e-007 | 1    | <a href="#">R.SSDANLYR.L</a> <a href="#">613</a>                                              |
| <a href="#">2455</a>                                                                                | 633.81                      | 1265.60      | 1265.59            | 8.02               | 0           | 26    | 0.019    | 1    | <a href="#">R.CMGTVTLNQR.G</a>                                                                |
| 205.                                                                                                | <a href="#">GBG5_HUMAN</a>  | Mass: 7428   | Score: 122         | Queries matched: 3 | emPAI: 0.56 |       |          |      |                                                                                               |
| Guanine nucleotide-binding protein G(I)/G(S)/G(O) subunit gamma-5 OS=Homo sapiens GN=GNG5 PE=1 SV=3 |                             |              |                    |                    |             |       |          |      |                                                                                               |
| Query                                                                                               | Observed                    | Mr(expt)     | Mr(calc)           | ppm                | Miss        | Score | Expect   | Rank | Peptide                                                                                       |
| <a href="#">489</a>                                                                                 | 451.75                      | 901.49       | 901.49             | -1.59              | 0           | 67    | 2.9e-006 | 1    | <a href="#">K.VSQAADLQ.Q</a> <a href="#">487</a> <a href="#">491</a>                          |
| 206.                                                                                                | <a href="#">TMC5_HUMAN</a>  | Mass: 115636 | Score: 122         | Queries matched: 7 | emPAI: 0.06 |       |          |      |                                                                                               |
| Transmembrane channel-like protein 5 OS=Homo sapiens GN=TMC5 PE=2 SV=3                              |                             |              |                    |                    |             |       |          |      |                                                                                               |



| Query                                                                                     | Observed                    | Mr(expt)       | Mr(calc)           | ppm                 | Miss        | Score       | Expect          | Rank     | Peptide                                                                                                                       |
|-------------------------------------------------------------------------------------------|-----------------------------|----------------|--------------------|---------------------|-------------|-------------|-----------------|----------|-------------------------------------------------------------------------------------------------------------------------------|
| <a href="#">398</a>                                                                       | 443.72                      | 885.43         | 885.43             | 2.44                | 0           | 11          | 0.48            | 2        | R.SVQEGNPR.A                                                                                                                  |
| <a href="#">868</a>                                                                       | 490.74                      | 979.47         | 979.47             | 1.41                | 0           | 4           | 2.9             | 2        | R.SNPYSVASR.T <a href="#">865</a>                                                                                             |
| <a href="#">2097</a>                                                                      | <b>601.35</b>               | <b>1200.69</b> | <b>1200.69</b>     | <b>-1.19</b>        | <b>0</b>    | <b>46</b>   | <b>9.9e-005</b> | <b>1</b> | <b>K.LIASLIPMTR.D <a href="#">2098</a></b>                                                                                    |
| <a href="#">2180</a>                                                                      | <b>609.35</b>               | <b>1216.68</b> | <b>1216.68</b>     | <b>-0.21</b>        | <b>0</b>    | <b>(45)</b> | <b>0.00016</b>  | <b>1</b> | <b>K.LIASLIPMTR.D <a href="#">2181</a></b>                                                                                    |
| <hr/>                                                                                     |                             |                |                    |                     |             |             |                 |          |                                                                                                                               |
| 207.                                                                                      | <a href="#">CRIS1_HUMAN</a> | Mass: 29432    | Score: 122         | Queries matched: 6  | emPAI: 0.27 |             |                 |          |                                                                                                                               |
| Cysteine-rich secretory protein 1 OS=Homo sapiens GN=CRISP1 PE=1 SV=1                     |                             |                |                    |                     |             |             |                 |          |                                                                                                                               |
| Query                                                                                     | Observed                    | Mr(expt)       | Mr(calc)           | ppm                 | Miss        | Score       | Expect          | Rank     | Peptide                                                                                                                       |
| <a href="#">1313</a>                                                                      | <b>528.30</b>               | <b>1054.59</b> | <b>1054.58</b>     | <b>2.74</b>         | <b>0</b>    | <b>9</b>    | <b>0.77</b>     | <b>1</b> | <b>R.VVPPASNMLK.M</b>                                                                                                         |
| <a href="#">1397</a>                                                                      | 536.30                      | 1070.58        | 1070.58            | -1.45               | 0           | (0)         | 7.7             | 7        | R.VVPPASNMLK.M                                                                                                                |
| <a href="#">2142</a>                                                                      | <b>605.78</b>               | <b>1209.54</b> | <b>1209.54</b>     | <b>0.81</b>         | <b>0</b>    | <b>58</b>   | <b>6.8e-006</b> | <b>1</b> | <b>K.ATCLCDTEIK.- <a href="#">2143</a></b>                                                                                    |
| <a href="#">4088</a>                                                                      | <b>862.34</b>               | <b>1722.66</b> | <b>1722.66</b>     | <b>-1.27</b>        | <b>0</b>    | <b>57</b>   | <b>2.2e-006</b> | <b>1</b> | <b>K.TGVPCACPSNCEDK.L <a href="#">4087</a></b>                                                                                |
| <hr/>                                                                                     |                             |                |                    |                     |             |             |                 |          |                                                                                                                               |
| 208.                                                                                      | <a href="#">GNAL_HUMAN</a>  | Score: 122     | Queries matched: 4 |                     |             |             |                 |          |                                                                                                                               |
| Guanine nucleotide-binding protein G(olf) subunit alpha OS=Homo sapiens GN=GNAL PE=1 SV=1 |                             |                |                    |                     |             |             |                 |          |                                                                                                                               |
| Query                                                                                     | Observed                    | Mr(expt)       | Mr(calc)           | ppm                 | Miss        | Score       | Expect          | Rank     | Peptide                                                                                                                       |
| <a href="#">172</a>                                                                       | 417.70                      | 833.40         | 833.40             | 0.17                | 0           | 0           | 8.3             | 10       | K.QDMLAEK.V                                                                                                                   |
| <a href="#">690</a>                                                                       | 470.20                      | 938.39         | 938.39             | -9.82               | 0           | 8           | 0.24            | 6        | -_MGCLGGNSK.T                                                                                                                 |
| <a href="#">1316</a>                                                                      | <b>529.32</b>               | <b>1056.62</b> | <b>1056.62</b>     | <b>0.47</b>         | <b>0</b>    | <b>73</b>   | <b>2.5e-007</b> | <b>1</b> | <b>R.LLLLGAESGK.S <a href="#">1317</a></b>                                                                                    |
| <hr/>                                                                                     |                             |                |                    |                     |             |             |                 |          |                                                                                                                               |
| 209.                                                                                      | <a href="#">ENOB_HUMAN</a>  | Mass: 47299    | Score: 121         | Queries matched: 1  | emPAI: 0.08 |             |                 |          |                                                                                                                               |
| Beta-enolase OS=Homo sapiens GN=ENO3 PE=1 SV=5                                            |                             |                |                    |                     |             |             |                 |          |                                                                                                                               |
| Query                                                                                     | Observed                    | Mr(expt)       | Mr(calc)           | ppm                 | Miss        | Score       | Expect          | Rank     | Peptide                                                                                                                       |
| <a href="#">3812</a>                                                                      | <b>817.42</b>               | <b>1632.83</b> | <b>1632.81</b>     | <b>6.99</b>         | <b>0</b>    | <b>121</b>  | <b>6.1e-012</b> | <b>1</b> | <b>K.VNQIGSVTESIQACK.L</b>                                                                                                    |
| <hr/>                                                                                     |                             |                |                    |                     |             |             |                 |          |                                                                                                                               |
| 210.                                                                                      | <a href="#">SH3B4_HUMAN</a> | Mass: 108397   | Score: 121         | Queries matched: 12 | emPAI: 0.11 |             |                 |          |                                                                                                                               |
| SH3 domain-binding protein 4 OS=Homo sapiens GN=SH3BP4 PE=1 SV=1                          |                             |                |                    |                     |             |             |                 |          |                                                                                                                               |
| Query                                                                                     | Observed                    | Mr(expt)       | Mr(calc)           | ppm                 | Miss        | Score       | Expect          | Rank     | Peptide                                                                                                                       |
| <a href="#">1153</a>                                                                      | 517.28                      | 1032.54        | 1032.54            | 5.25                | 0           | 24          | 0.035           | 2        | K.STVGLQCLR.S                                                                                                                 |
| <a href="#">1234</a>                                                                      | <b>523.24</b>               | <b>1044.47</b> | <b>1044.47</b>     | <b>-5.09</b>        | <b>0</b>    | <b>36</b>   | <b>0.00088</b>  | <b>1</b> | <b>R.AELDSEPER.V <a href="#">1232</a> <a href="#">1233</a> <a href="#">1235</a> <a href="#">1236</a> <a href="#">1237</a></b> |
| <a href="#">1799</a>                                                                      | <b>573.78</b>               | <b>1145.55</b> | <b>1145.55</b>     | <b>0.18</b>         | <b>0</b>    | <b>42</b>   | <b>0.00048</b>  | <b>1</b> | <b>K.SPAPQFQSR.E <a href="#">1796</a> <a href="#">1797</a> <a href="#">1798</a> <a href="#">1800</a></b>                      |
| <hr/>                                                                                     |                             |                |                    |                     |             |             |                 |          |                                                                                                                               |
| 211.                                                                                      | <a href="#">DCXR_HUMAN</a>  | Mass: 26182    | Score: 119         | Queries matched: 1  | emPAI: 0.15 |             |                 |          |                                                                                                                               |
| L-xylulose reductase OS=Homo sapiens GN=DCXR PE=1 SV=2                                    |                             |                |                    |                     |             |             |                 |          |                                                                                                                               |
| Query                                                                                     | Observed                    | Mr(expt)       | Mr(calc)           | ppm                 | Miss        | Score       | Expect          | Rank     | Peptide                                                                                                                       |
| <a href="#">3895</a>                                                                      | <b>829.92</b>               | <b>1657.83</b> | <b>1657.82</b>     | <b>4.00</b>         | <b>0</b>    | <b>119</b>  | <b>8e-012</b>   | <b>1</b> | <b>R.GVPGAIVNVSSQCSQR.A</b>                                                                                                   |
| <hr/>                                                                                     |                             |                |                    |                     |             |             |                 |          |                                                                                                                               |
| 212.                                                                                      | <a href="#">PEBP1_HUMAN</a> | Mass: 21158    | Score: 117         | Queries matched: 1  | emPAI: 0.18 |             |                 |          |                                                                                                                               |
| Phosphatidylethanolamine-binding protein 1 OS=Homo sapiens GN=PEBP1 PE=1 SV=3             |                             |                |                    |                     |             |             |                 |          |                                                                                                                               |
| Query                                                                                     | Observed                    | Mr(expt)       | Mr(calc)           | ppm                 | Miss        | Score       | Expect          | Rank     | Peptide                                                                                                                       |
| <a href="#">4528</a>                                                                      | <b>975.48</b>               | <b>1948.95</b> | <b>1948.94</b>     | <b>4.46</b>         | <b>0</b>    | <b>117</b>  | <b>1.3e-011</b> | <b>1</b> | <b>K.GNDISSGTVLSDYVGSPPK.G</b>                                                                                                |
| <hr/>                                                                                     |                             |                |                    |                     |             |             |                 |          |                                                                                                                               |
| 213.                                                                                      | <a href="#">ZA2G_HUMAN</a>  | Mass: 34465    | Score: 116         | Queries matched: 5  | emPAI: 0.23 |             |                 |          |                                                                                                                               |
| Zinc-alpha-2-glycoprotein OS=Homo sapiens GN=AZGP1 PE=1 SV=2                              |                             |                |                    |                     |             |             |                 |          |                                                                                                                               |
| Query                                                                                     | Observed                    | Mr(expt)       | Mr(calc)           | ppm                 | Miss        | Score       | Expect          | Rank     | Peptide                                                                                                                       |
| <a href="#">9</a>                                                                         | 401.23                      | 800.44         | 800.44             | -4.19               | 1           | 13          | 0.34            | 2        | K.YLKYSK.N <a href="#">8</a>                                                                                                  |
| <a href="#">1671</a>                                                                      | <b>564.29</b>               | <b>1126.56</b> | <b>1126.56</b>     | <b>1.55</b>         | <b>0</b>    | <b>49</b>   | <b>6.7e-005</b> | <b>1</b> | <b>R.AGEVQPELR.G <a href="#">1672</a></b>                                                                                     |
| <a href="#">3225</a>                                                                      | <b>726.35</b>               | <b>1450.68</b> | <b>1450.68</b>     | <b>1.89</b>         | <b>0</b>    | <b>71</b>   | <b>3.8e-007</b> | <b>1</b> | <b>K.AYLEEECPATLR.K</b>                                                                                                       |
| <hr/>                                                                                     |                             |                |                    |                     |             |             |                 |          |                                                                                                                               |
| 214.                                                                                      | <a href="#">CHM4B_HUMAN</a> | Mass: 24935    | Score: 116         | Queries matched: 3  | emPAI: 0.15 |             |                 |          |                                                                                                                               |

Charged multivesicular body protein 4b OS=Homo sapiens GN=CHMP4B PE=1 SV=1

| Query                | Observed | Mr(expt) | Mr(calc) | ppm   | Miss | Score | Expect   | Rank | Peptide                                                   |
|----------------------|----------|----------|----------|-------|------|-------|----------|------|-----------------------------------------------------------|
| <a href="#">1856</a> | 577.30   | 1152.59  | 1152.59  | -1.49 | 0    | 58    | 1.5e-005 | 1    | K.GGPTPQEAIQR.L <a href="#">1857</a> <a href="#">1858</a> |

215. [LDH6A\\_HUMAN](#) Mass: 36826 Score: 115 Queries matched: 5 emPAI: 0.10

L-lactate dehydrogenase A-like 6A OS=Homo sapiens GN=LDHAL6A PE=2 SV=1

| Query                | Observed | Mr(expt) | Mr(calc) | ppm   | Miss | Score | Expect   | Rank | Peptide                                                    |
|----------------------|----------|----------|----------|-------|------|-------|----------|------|------------------------------------------------------------|
| <a href="#">2354</a> | 624.81   | 1247.60  | 1247.59  | 5.12  | 0    | 68    | 1.1e-006 | 1    | R.VIGSGCNLDSAR.F <a href="#">2352</a> <a href="#">2353</a> |
| <a href="#">3190</a> | 719.84   | 1437.66  | 1437.66  | -5.08 | 0    | 1     | 3.5      | 6    | K.NFAEIEAIHNNK.I <a href="#">3189</a>                      |

216. [PRIO\\_HUMAN](#) Mass: 27871 Score: 115 Queries matched: 5 emPAI: 0.14

Major prion protein OS=Homo sapiens GN=PRNP PE=1 SV=1

| Query                | Observed | Mr(expt) | Mr(calc) | ppm   | Miss | Score | Expect   | Rank | Peptide                                                                                          |
|----------------------|----------|----------|----------|-------|------|-------|----------|------|--------------------------------------------------------------------------------------------------|
| <a href="#">1224</a> | 522.74   | 1043.47  | 1043.47  | -1.81 | 0    | 52    | 1.7e-005 | 1    | R.ESQAYYQR.G <a href="#">1219</a> <a href="#">1220</a> <a href="#">1222</a> <a href="#">1223</a> |

217. [TCPO\\_HUMAN](#) Mass: 60153 Score: 114 Queries matched: 1 emPAI: 0.06

T-complex protein 1 subunit theta OS=Homo sapiens GN=CCT8 PE=1 SV=4

| Query                | Observed | Mr(expt) | Mr(calc) | ppm  | Miss | Score | Expect   | Rank | Peptide             |
|----------------------|----------|----------|----------|------|------|-------|----------|------|---------------------|
| <a href="#">2967</a> | 686.88   | 1371.74  | 1371.74  | 0.18 | 0    | 114   | 3.2e-011 | 1    | K.AIADTGANVVVTGGK.V |

218. [LSR\\_HUMAN](#) Mass: 72534 Score: 113 Queries matched: 6 emPAI: 0.05

Lipolysis-stimulated lipoprotein receptor OS=Homo sapiens GN=LSR PE=1 SV=4

| Query                | Observed | Mr(expt) | Mr(calc) | ppm   | Miss | Score | Expect   | Rank | Peptide                                                   |
|----------------------|----------|----------|----------|-------|------|-------|----------|------|-----------------------------------------------------------|
| <a href="#">1465</a> | 544.28   | 1086.54  | 1086.53  | 8.73  | 1    | 5     | 2.3      | 2    | R.EQAGGGWRAR.R                                            |
| <a href="#">1898</a> | 581.29   | 1160.57  | 1160.56  | 4.26  | 0    | 4     | 3.4      | 4    | -..MQQDGLGVGTR.N                                          |
| <a href="#">2506</a> | 639.79   | 1277.57  | 1277.57  | 0.09  | 0    | 61    | 3.4e-006 | 1    | R.IQASQQDDSMR.V <a href="#">2504</a> <a href="#">2505</a> |
| <a href="#">3523</a> | 771.37   | 1540.73  | 1540.73  | -0.87 | 0    | 6     | 1.4      | 1    | K.QGNAVTLGDYYQGR.R                                        |

219. [P20D2\\_HUMAN](#) Mass: 48088 Score: 113 Queries matched: 3 emPAI: 0.08

Peptidase M20 domain-containing protein 2 OS=Homo sapiens GN=PM20D2 PE=1 SV=2

| Query                | Observed | Mr(expt) | Mr(calc) | ppm  | Miss | Score | Expect   | Rank | Peptide                             |
|----------------------|----------|----------|----------|------|------|-------|----------|------|-------------------------------------|
| <a href="#">818</a>  | 484.74   | 967.46   | 967.45   | 5.73 | 1    | 1     | 3.7      | 9    | K.AYMENGRK.L                        |
| <a href="#">2358</a> | 625.77   | 1249.53  | 1249.52  | 3.37 | 0    | 71    | 1.5e-007 | 1    | R.SAECIDEAER.L <a href="#">2357</a> |

220. [CTNB1\\_HUMAN](#) Mass: 86069 Score: 112 Queries matched: 2 emPAI: 0.04

Catenin beta-1 OS=Homo sapiens GN=CTNNB1 PE=1 SV=1

| Query                | Observed | Mr(expt) | Mr(calc) | ppm   | Miss | Score | Expect | Rank | Peptide                               |
|----------------------|----------|----------|----------|-------|------|-------|--------|------|---------------------------------------|
| <a href="#">3048</a> | 698.31   | 1394.60  | 1394.61  | -4.21 | 0    | 69    | 4e-007 | 1    | R.TMQNTNDVETAR.C <a href="#">3049</a> |

221. [PGAM1\\_HUMAN](#) Mass: 28900 Score: 111 Queries matched: 3 emPAI: 0.28

Phosphoglycerate mutase 1 OS=Homo sapiens GN=PGAM1 PE=1 SV=2

| Query               | Observed | Mr(expt) | Mr(calc) | ppm  | Miss | Score | Expect   | Rank | Peptide                            |
|---------------------|----------|----------|----------|------|------|-------|----------|------|------------------------------------|
| <a href="#">847</a> | 488.25   | 974.49   | 974.49   | 0.96 | 0    | (52)  | 6.8e-005 | 1    | K.AMEAVAAQGK.A                     |
| <a href="#">934</a> | 496.25   | 990.48   | 990.48   | 2.19 | 0    | 60    | 1.2e-005 | 1    | K.AMEAVAAQGK.A <a href="#">933</a> |

Proteins matching the same set of peptides:

[PGAM2\\_HUMAN](#) Mass: 28919 Score: 111 Queries matched: 3

Phosphoglycerate mutase 2 OS=Homo sapiens GN=PGAM2 PE=1 SV=3

222. [K1C25\\_HUMAN](#) Mass: 49858 Score: 109 Queries matched: 4 emPAI: 0.07

Keratin, type I cytoskeletal 25 OS=Homo sapiens GN=KRT25 PE=1 SV=1

| Query                | Observed | Mr(expt) | Mr(calc) | ppm  | Miss | Score | Expect   | Rank | Peptide                            |
|----------------------|----------|----------|----------|------|------|-------|----------|------|------------------------------------|
| <a href="#">92</a>   | 409.23   | 816.44   | 816.43   | 4.86 | 0    | 3     | 7.2      | 1    | R.GLLSGNEK.V <a href="#">91</a>    |
| <a href="#">1566</a> | 553.77   | 1105.52  | 1105.52  | 0.27 | 0    | 65    | 2.2e-006 | 1    | K.VTMQNLNDR.L <a href="#">1567</a> |

223. [K1C28\\_HUMAN](#) Mass: 51163 Score: 109 Queries matched: 3 emPAI: 0.07

Keratin, type I cytoskeletal 28 OS=Homo sapiens GN=KRT28 PE=1 SV=2

| Query                | Observed | Mr(expt) | Mr(calc) | ppm   | Miss | Score | Expect   | Rank | Peptide                            |
|----------------------|----------|----------|----------|-------|------|-------|----------|------|------------------------------------|
| <a href="#">1566</a> | 553.77   | 1105.52  | 1105.52  | 0.27  | 0    | 65    | 2.2e-006 | 1    | K.VTMQNLNDR.L <a href="#">1567</a> |
| <a href="#">3474</a> | 762.87   | 1523.72  | 1523.72  | -2.69 | 1    | 1     | 5.7      | 2    | K.GFGSGSPGNSSKDLISK.T              |

224. [S10AB\\_HUMAN](#) Mass: 11847 Score: 108 Queries matched: 4 emPAI: 0.78

Protein S100-A11 OS=Homo sapiens GN=S100A11 PE=1 SV=2

| Query                | Observed | Mr(expt) | Mr(calc) | ppm   | Miss | Score | Expect   | Rank | Peptide                            |
|----------------------|----------|----------|----------|-------|------|-------|----------|------|------------------------------------|
| <a href="#">1086</a> | 510.25   | 1018.49  | 1018.49  | 0.05  | 0    | 42    | 0.00056  | 1    | K.ISSPTETER.C <a href="#">1087</a> |
| <a href="#">1321</a> | 530.75   | 1059.48  | 1059.49  | -3.34 | 0    | 53    | 1.6e-005 | 1    | K.DGYNITLSK.T <a href="#">1320</a> |

225. [RAB5A\\_HUMAN](#) Mass: 23872 Score: 107 Queries matched: 3 emPAI: 0.16

Ras-related protein Rab-5A OS=Homo sapiens GN=RAB5A PE=1 SV=2

| Query                | Observed | Mr(expt) | Mr(calc) | ppm   | Miss | Score | Expect   | Rank | Peptide                                                   |
|----------------------|----------|----------|----------|-------|------|-------|----------|------|-----------------------------------------------------------|
| <a href="#">2392</a> | 627.79   | 1253.57  | 1253.57  | -1.10 | 0    | 54    | 1.7e-005 | 1    | K.NEPQNPANSAR.G <a href="#">2393</a> <a href="#">2394</a> |

226. [S26A2\\_HUMAN](#) Mass: 82635 Score: 106 Queries matched: 3 emPAI: 0.09

Sulfate transporter OS=Homo sapiens GN=SLC26A2 PE=1 SV=2

| Query                | Observed | Mr(expt) | Mr(calc) | ppm   | Miss | Score | Expect   | Rank | Peptide                          |
|----------------------|----------|----------|----------|-------|------|-------|----------|------|----------------------------------|
| <a href="#">776</a>  | 482.70   | 963.39   | 963.39   | 0.77  | 0    | 52    | 6.9e-006 | 1    | K.NCQCSPAK.A <a href="#">777</a> |
| <a href="#">1112</a> | 513.32   | 1024.63  | 1024.63  | -0.99 | 0    | 33    | 0.00051  | 1    | K.QTVNPILIK.V                    |

227. [MT1F\\_HUMAN](#) Mass: 7222 Score: 106 Queries matched: 3 emPAI: 1.49

Metallothionein-1F OS=Homo sapiens GN=MT1F PE=1 SV=1

| Query                | Observed | Mr(expt) | Mr(calc) | ppm  | Miss | Score | Expect   | Rank | Peptide                               |
|----------------------|----------|----------|----------|------|------|-------|----------|------|---------------------------------------|
| <a href="#">876</a>  | 491.70   | 981.38   | 981.38   | 1.78 | 0    | 57    | 2.2e-006 | 1    | K.CAQGCVCK.G                          |
| <a href="#">3271</a> | 731.26   | 1460.50  | 1460.50  | 1.67 | 0    | 48    | 1.5e-005 | 1    | K.SCCSCCPVGCCK.C <a href="#">3270</a> |

228. [EIF5A1\\_HUMAN](#) Mass: 17049 Score: 106 Queries matched: 4 emPAI: 0.50

Eukaryotic translation initiation factor 5A-1 OS=Homo sapiens GN=EIF5A PE=1 SV=2

| Query               | Observed | Mr(expt) | Mr(calc) | ppm  | Miss | Score | Expect   | Rank | Peptide                          |
|---------------------|----------|----------|----------|------|------|-------|----------|------|----------------------------------|
| <a href="#">459</a> | 447.74   | 893.46   | 893.45   | 5.25 | 0    | (41)  | 0.00075  | 1    | K.IVEMSTSK.T <a href="#">458</a> |
| <a href="#">552</a> | 455.73   | 909.45   | 909.45   | 1.01 | 0    | 51    | 4.6e-005 | 1    | K.IVEMSTSK.T <a href="#">553</a> |

Proteins matching the same set of peptides:

[EIF5A2\\_HUMAN](#) Mass: 17124 Score: 106 Queries matched: 4

Eukaryotic translation initiation factor 5A-2 OS=Homo sapiens GN=EIF5A2 PE=1 SV=3

229. [SYTL1\\_HUMAN](#) Mass: 62104 Score: 105 Queries matched: 4 emPAI: 0.06

Synaptotagmin-like protein 1 OS=Homo sapiens GN=SYTL1 PE=1 SV=1

| Query                | Observed | Mr(expt) | Mr(calc) | ppm   | Miss | Score | Expect  | Rank | Peptide                                                                        |
|----------------------|----------|----------|----------|-------|------|-------|---------|------|--------------------------------------------------------------------------------|
| <a href="#">1995</a> | 590.30   | 1178.59  | 1178.59  | -2.11 | 0    | 47    | 0.00015 | 1    | R.VPPSPDDLPSR.G <a href="#">1997</a> <a href="#">2000</a> <a href="#">2001</a> |

230. [KADI\\_HUMAN](#) Mass: 21735 Score: 104 Queries matched: 7 emPAI: 0.38

Adenylate kinase isoenzyme 1 OS=Homo sapiens GN=AK1 PE=1 SV=3

| Query               | Observed | Mr(expt) | Mr(calc) | ppm  | Miss | Score | Expect  | Rank | Peptide                                                                                       |
|---------------------|----------|----------|----------|------|------|-------|---------|------|-----------------------------------------------------------------------------------------------|
| <a href="#">362</a> | 440.21   | 878.41   | 878.41   | 1.43 | 0    | 43    | 0.00045 | 1    | R.SEVSSGSAR.G <a href="#">361</a> <a href="#">363</a> <a href="#">364</a> <a href="#">365</a> |

[2361](#) 625.79 1249.56 1249.56 0.19 0 29 0.0055 2 R.EVQQGEEFER.R [2360](#)

231. [RAB10\\_HUMAN](#) Score: 104 Queries matched: 4

Ras-related protein Rab-10 OS=Homo sapiens GN=RAB10 PE=1 SV=1

| Query                | Observed | Mr(expt) | Mr(calc) | ppm  | Miss | Score | Expect   | Rank | Peptide                       |
|----------------------|----------|----------|----------|------|------|-------|----------|------|-------------------------------|
| <a href="#">8</a>    | 401.23   | 800.44   | 800.44   | 0.54 | 0    | 11    | 0.54     | 2    | K.ANINIEK.A <a href="#">9</a> |
| <a href="#">1398</a> | 536.33   | 1070.64  | 1070.63  | 3.27 | 0    | 51    | 4.5e-005 | 1    | K.LLLIGDSGVGK.T               |
| <a href="#">2701</a> | 658.83   | 1315.65  | 1315.65  | 1.50 | 0    | 74    | 3.2e-007 | 1    | K.LQIWDTAGQER.F               |

232. [RAB15\\_HUMAN](#) Mass: 24660 Score: 104 Queries matched: 2 emPAI: 0.33

Ras-related protein Rab-15 OS=Homo sapiens GN=RAB15 PE=1 SV=1

| Query                | Observed | Mr(expt) | Mr(calc) | ppm  | Miss | Score | Expect   | Rank | Peptide         |
|----------------------|----------|----------|----------|------|------|-------|----------|------|-----------------|
| <a href="#">1398</a> | 536.33   | 1070.64  | 1070.63  | 3.27 | 0    | 51    | 4.5e-005 | 1    | R.LLLIGDSGVGK.T |
| <a href="#">2701</a> | 658.83   | 1315.65  | 1315.65  | 1.50 | 0    | 74    | 3.2e-007 | 1    | R.IQIWDTAGQER.Y |

233. [GBB2\\_HUMAN](#) Mass: 38048 Score: 104 Queries matched: 4 emPAI: 0.21

Guanine nucleotide-binding protein G(I)/G(S)/G(T) subunit beta-2 OS=Homo sapiens GN=GNB2 PE=1 SV=3

| Query                | Observed | Mr(expt) | Mr(calc) | ppm   | Miss | Score | Expect   | Rank | Peptide          |
|----------------------|----------|----------|----------|-------|------|-------|----------|------|------------------|
| <a href="#">26</a>   | 402.73   | 803.44   | 803.44   | -5.61 | 1    | 6     | 3.6      | 4    | R.IQMRTR.R       |
| <a href="#">1043</a> | 505.26   | 1008.51  | 1008.51  | -0.53 | 0    | 56    | 1.7e-005 | 1    | R.AGVLAGHDNR.V   |
| <a href="#">1078</a> | 509.29   | 1016.56  | 1016.55  | 7.85  | 0    | 69    | 1e-006   | 1    | R.LLVASQDGK.L    |
| <a href="#">2410</a> | 628.30   | 1254.60  | 1254.59  | 3.08  | 0    | 5     | 1.6      | 1    | R.FTVSGACDASIK.L |

234. [MARCS\\_HUMAN](#) Mass: 31707 Score: 104 Queries matched: 2 emPAI: 0.12

Myristoylated alanine-rich C-kinase substrate OS=Homo sapiens GN=MARCKS PE=1 SV=4

| Query                | Observed | Mr(expt) | Mr(calc) | ppm  | Miss | Score | Expect   | Rank | Peptide                                 |
|----------------------|----------|----------|----------|------|------|-------|----------|------|-----------------------------------------|
| <a href="#">3399</a> | 750.85   | 1499.68  | 1499.67  | 1.19 | 0    | 66    | 1.1e-006 | 1    | K.AEDGATPSPNETPK.K <a href="#">3398</a> |

235. [TMM8A\\_HUMAN](#) Mass: 86359 Score: 104 Queries matched: 3 emPAI: 0.04

Transmembrane protein 8A OS=Homo sapiens GN=TMEM8A PE=1 SV=3

| Query                | Observed | Mr(expt) | Mr(calc) | ppm   | Miss | Score | Expect   | Rank | Peptide                                                  |
|----------------------|----------|----------|----------|-------|------|-------|----------|------|----------------------------------------------------------|
| <a href="#">1941</a> | 584.26   | 1166.51  | 1166.51  | -0.15 | 0    | 53    | 1.6e-005 | 1    | R.VCSDTPSVMR.L <a href="#">1939</a> <a href="#">1940</a> |

236. [HIN1L\\_HUMAN](#) Mass: 50162 Score: 104 Queries matched: 3 emPAI: 0.07

Putative HIN1-like protein OS=Homo sapiens GN=HIN1L PE=5 SV=1

| Query               | Observed | Mr(expt) | Mr(calc) | ppm   | Miss | Score | Expect   | Rank | Peptide                                             |
|---------------------|----------|----------|----------|-------|------|-------|----------|------|-----------------------------------------------------|
| <a href="#">262</a> | 427.69   | 853.37   | 853.38   | -1.53 | 0    | 48    | 5.5e-005 | 1    | K.DGSCIFR.A <a href="#">263</a> <a href="#">264</a> |

Proteins matching the same set of peptides:

[OTUD4\\_HUMAN](#) Mass: 124695 Score: 104 Queries matched: 3

OTU domain-containing protein 4 OS=Homo sapiens GN=OTUD4 PE=1 SV=3

237. [LG3BP\\_HUMAN](#) Mass: 66202 Score: 103 Queries matched: 2 emPAI: 0.06

Galactin-3-binding protein OS=Homo sapiens GN=LGALS3BP PE=1 SV=1

| Query                | Observed | Mr(expt) | Mr(calc) | ppm  | Miss | Score | Expect   | Rank | Peptide                             |
|----------------------|----------|----------|----------|------|------|-------|----------|------|-------------------------------------|
| <a href="#">1319</a> | 530.26   | 1058.51  | 1058.51  | 1.95 | 0    | 81    | 4.4e-008 | 1    | R.LADGGATNQR.V <a href="#">1318</a> |

238. [ZCCHV\\_HUMAN](#) Mass: 103135 Score: 102 Queries matched: 2 emPAI: 0.04

Zinc finger CCH-type antiviral protein 1 OS=Homo sapiens GN=ZC3HAV1 PE=1 SV=3

| Query                | Observed | Mr(expt) | Mr(calc) | ppm   | Miss | Score | Expect | Rank | Peptide                               |
|----------------------|----------|----------|----------|-------|------|-------|--------|------|---------------------------------------|
| <a href="#">3440</a> | 758.34   | 1514.67  | 1514.67  | -0.31 | 0    | 66    | 1e-006 | 1    | R.QQICNQQPPCSR.L <a href="#">3441</a> |

|                                                                                              |                              |             |            |                     |                                                                                                                            |
|----------------------------------------------------------------------------------------------|------------------------------|-------------|------------|---------------------|----------------------------------------------------------------------------------------------------------------------------|
| 239.                                                                                         | <a href="#">BCAS1_HUMAN</a>  | Mass: 61957 | Score: 101 | Queries matched: 10 | emPAI: 0.06                                                                                                                |
| Breast carcinoma-amplified sequence 1 OS=Homo sapiens GN=BCAS1 PE=1 SV=2                     |                              |             |            |                     |                                                                                                                            |
| Query                                                                                        | Observed                     | Mr(expt)    | Mr(calc)   | ppm                 | Miss Score Expect Rank Peptide                                                                                             |
| <a href="#">457</a>                                                                          | 447.72                       | 893.43      | 893.43     | -0.32               | 1 3 4.1 2 K.KSAAEMNK.Q <a href="#">450</a> <a href="#">451</a> <a href="#">453</a> <a href="#">455</a> <a href="#">456</a> |
| <a href="#">497</a>                                                                          | 452.24                       | 902.47      | 902.47     | -0.86               | 1 7 2.1 4 K.DIVDGKEK.E                                                                                                     |
| <a href="#">3595</a>                                                                         | 781.91                       | 1561.80     | 1561.80    | 3.45                | 0 61 6e-006 1 K.TITPPEPEPTGAPQK.G <a href="#">3593</a> <a href="#">3594</a>                                                |
| 240.                                                                                         | <a href="#">CBR1_HUMAN</a>   | Mass: 30641 | Score: 100 | Queries matched: 3  | emPAI: 0.12                                                                                                                |
| Carbonyl reductase [NADPH] 1 OS=Homo sapiens GN=CBR1 PE=1 SV=3                               |                              |             |            |                     |                                                                                                                            |
| Query                                                                                        | Observed                     | Mr(expt)    | Mr(calc)   | ppm                 | Miss Score Expect Rank Peptide                                                                                             |
| <a href="#">1416</a>                                                                         | 538.75                       | 1075.49     | 1075.50    | -2.72               | 0 50 3.6e-005 1 K.SCSPELQQK.F <a href="#">1417</a> <a href="#">1418</a>                                                    |
| 241.                                                                                         | <a href="#">DNJB2_HUMAN</a>  | Mass: 35672 | Score: 99  | Queries matched: 7  | emPAI: 0.11                                                                                                                |
| DnaJ homolog subfamily B member 2 OS=Homo sapiens GN=DNAJB2 PE=1 SV=3                        |                              |             |            |                     |                                                                                                                            |
| Query                                                                                        | Observed                     | Mr(expt)    | Mr(calc)   | ppm                 | Miss Score Expect Rank Peptide                                                                                             |
| <a href="#">30</a>                                                                           | 403.70                       | 805.38      | 805.38     | -5.00               | 0 3 3.3 8 R.SASADDIK.K <a href="#">29</a>                                                                                  |
| <a href="#">296</a>                                                                          | 432.22                       | 862.42      | 862.42     | -3.37               | 0 4 4.7 7 R.SPEEVFR.E                                                                                                      |
| <a href="#">1706</a>                                                                         | 566.78                       | 1131.55     | 1131.55    | -1.24               | 0 57 1.4e-005 1 R.EGLTGTGTGPSR.A <a href="#">1703</a> <a href="#">1704</a> <a href="#">1705</a>                            |
| 242.                                                                                         | <a href="#">TSPAN6_HUMAN</a> | Mass: 28172 | Score: 99  | Queries matched: 4  | emPAI: 0.13                                                                                                                |
| Tetraspanin-6 OS=Homo sapiens GN=TSPAN6 PE=1 SV=1                                            |                              |             |            |                     |                                                                                                                            |
| Query                                                                                        | Observed                     | Mr(expt)    | Mr(calc)   | ppm                 | Miss Score Expect Rank Peptide                                                                                             |
| <a href="#">1080</a>                                                                         | 509.73                       | 1017.45     | 1017.45    | -0.07               | 0 65 1e-006 1 K.LEDCTPQR.D <a href="#">1081</a>                                                                            |
| <a href="#">1917</a>                                                                         | 582.80                       | 1163.58     | 1163.58    | 2.12                | 0 17 0.17 1 R.AITNNQYEIV.- <a href="#">1916</a>                                                                            |
| 243.                                                                                         | <a href="#">TXNL1_HUMAN</a>  | Mass: 32630 | Score: 98  | Queries matched: 3  | emPAI: 0.12                                                                                                                |
| Thioredoxin-like protein 1 OS=Homo sapiens GN=TXNL1 PE=1 SV=3                                |                              |             |            |                     |                                                                                                                            |
| Query                                                                                        | Observed                     | Mr(expt)    | Mr(calc)   | ppm                 | Miss Score Expect Rank Peptide                                                                                             |
| <a href="#">1782</a>                                                                         | 572.77                       | 1143.53     | 1143.53    | -3.13               | 0 48 6e-005 1 K.FQGPDPNGQPK.Y <a href="#">1781</a> <a href="#">1783</a>                                                    |
| 244.                                                                                         | <a href="#">CD36_HUMAN</a>   | Mass: 53589 | Score: 98  | Queries matched: 4  | emPAI: 0.07                                                                                                                |
| Platelet glycoprotein 4 OS=Homo sapiens GN=CD36 PE=1 SV=2                                    |                              |             |            |                     |                                                                                                                            |
| Query                                                                                        | Observed                     | Mr(expt)    | Mr(calc)   | ppm                 | Miss Score Expect Rank Peptide                                                                                             |
| <a href="#">125</a>                                                                          | 413.21                       | 824.40      | 824.40     | -2.84               | 0 41 0.0003 1 K.TGTEVYR.Q <a href="#">126</a> <a href="#">127</a> <a href="#">129</a>                                      |
| 245.                                                                                         | <a href="#">UBL3_HUMAN</a>   | Mass: 13263 | Score: 97  | Queries matched: 4  | emPAI: 0.30                                                                                                                |
| Ubiquitin-like protein 3 OS=Homo sapiens GN=UBL3 PE=1 SV=1                                   |                              |             |            |                     |                                                                                                                            |
| Query                                                                                        | Observed                     | Mr(expt)    | Mr(calc)   | ppm                 | Miss Score Expect Rank Peptide                                                                                             |
| <a href="#">2889</a>                                                                         | 678.33                       | 1354.65     | 1354.65    | -0.19               | 0 48 0.00011 1 R.ETLPEPNSQQR.N <a href="#">2886</a> <a href="#">2887</a> <a href="#">2888</a>                              |
| 246.                                                                                         | <a href="#">TR10C_HUMAN</a>  | Mass: 28244 | Score: 96  | Queries matched: 4  | emPAI: 0.29                                                                                                                |
| Tumor necrosis factor receptor superfamily member 10C OS=Homo sapiens GN=TNFRSF10C PE=1 SV=3 |                              |             |            |                     |                                                                                                                            |
| Query                                                                                        | Observed                     | Mr(expt)    | Mr(calc)   | ppm                 | Miss Score Expect Rank Peptide                                                                                             |
| <a href="#">550</a>                                                                          | 455.69                       | 909.37      | 909.37     | 1.94                | 0 39 0.00018 1 R.DTVCQCK.E                                                                                                 |
| <a href="#">1737</a>                                                                         | 568.73                       | 1135.44     | 1135.44    | 0.39                | 0 45 3.3e-005 1 R.NENSPEMCR.K <a href="#">1736</a> <a href="#">1738</a>                                                    |
| 247.                                                                                         | <a href="#">CD14_HUMAN</a>   | Mass: 40678 | Score: 96  | Queries matched: 3  | emPAI: 0.09                                                                                                                |
| Monocyte differentiation antigen CD14 OS=Homo sapiens GN=CD14 PE=1 SV=2                      |                              |             |            |                     |                                                                                                                            |
| Query                                                                                        | Observed                     | Mr(expt)    | Mr(calc)   | ppm                 | Miss Score Expect Rank Peptide                                                                                             |

[564](#) 456.75 911.48 911.48 -1.35 0 54 2.2e-005 1 R.ATVNPSAPR.C [565](#) [566](#)

248. [ALDR\\_HUMAN](#) Mass: 36230 Score: 93 Queries matched: 2 empAI: 0.10

Aldose reductase OS=Homo sapiens GN=AKR1B1 PE=1 SV=3

| Query                | Observed | Mr(expt) | Mr(calc) | ppm   | Miss | Score | Expect   | Rank | Peptide                              |
|----------------------|----------|----------|----------|-------|------|-------|----------|------|--------------------------------------|
| <a href="#">1591</a> | 556.80   | 1111.58  | 1111.59  | -5.79 | 0    | 57    | 1.2e-005 | 1    | K.SPPGQVTEAVK.V <a href="#">1592</a> |

249. [K22O\\_HUMAN](#) Mass: 66370 Score: 93 Queries matched: 12 empAI: 0.06

Keratin, type II cytoskeletal 2 oral OS=Homo sapiens GN=KRT76 PE=1 SV=2

| Query                | Observed | Mr(expt) | Mr(calc) | ppm   | Miss | Score | Expect   | Rank | Peptide                                                                                                                 |
|----------------------|----------|----------|----------|-------|------|-------|----------|------|-------------------------------------------------------------------------------------------------------------------------|
| <a href="#">1243</a> | 523.29   | 1044.56  | 1044.56  | 6.20  | 0    | 2     | 7.1      | 8    | K.LGELQTTAGR.H                                                                                                          |
| <a href="#">1376</a> | 533.76   | 1065.51  | 1065.51  | 1.11  | 1    | 14    | 0.33     | 4    | K.YEDEINKR.T                                                                                                            |
| <a href="#">1576</a> | 554.27   | 1106.53  | 1106.54  | -1.53 | 0    | 51    | 7.1e-005 | 1    | R.AQYEBIAQR.S <a href="#">1575</a> <a href="#">1577</a> <a href="#">1578</a>                                            |
| <a href="#">1759</a> | 570.28   | 1138.55  | 1138.55  | -2.64 | 0    | 12    | 0.4      | 3    | K.SEAEALYQTK.L <a href="#">1757</a> <a href="#">1760</a> <a href="#">1762</a> <a href="#">1763</a> <a href="#">1764</a> |

250. [K2C4\\_HUMAN](#) Mass: 57649 Score: 93 Queries matched: 5 empAI: 0.06

Keratin, type II cytoskeletal 4 OS=Homo sapiens GN=KRT4 PE=1 SV=4

| Query                | Observed | Mr(expt) | Mr(calc) | ppm   | Miss | Score | Expect   | Rank | Peptide                                                                      |
|----------------------|----------|----------|----------|-------|------|-------|----------|------|------------------------------------------------------------------------------|
| <a href="#">946</a>  | 497.76   | 993.50   | 993.49   | 6.25  | 0    | 4     | 3.9      | 10   | K.SISMSVAGSR.Q                                                               |
| <a href="#">1576</a> | 554.27   | 1106.53  | 1106.54  | -1.53 | 0    | 51    | 7.1e-005 | 1    | R.AQYEBIAQR.S <a href="#">1575</a> <a href="#">1577</a> <a href="#">1578</a> |

251. [INADL\\_HUMAN](#) Mass: 197046 Score: 91 Queries matched: 3 empAI: 0.02

InaD-like protein OS=Homo sapiens GN=INADL PE=1 SV=3

| Query                | Observed | Mr(expt) | Mr(calc) | ppm  | Miss | Score | Expect   | Rank | Peptide                                                      |
|----------------------|----------|----------|----------|------|------|-------|----------|------|--------------------------------------------------------------|
| <a href="#">3269</a> | 730.85   | 1459.69  | 1459.68  | 4.26 | 0    | 54    | 2.6e-005 | 1    | K.TSSSTSPLEPPSDR.G <a href="#">3267</a> <a href="#">3268</a> |

252. [MDHC\\_HUMAN](#) Mass: 36631 Score: 90 Queries matched: 3 empAI: 0.22

Malate dehydrogenase, cytoplasmic OS=Homo sapiens GN=MDH1 PE=1 SV=4

| Query                | Observed | Mr(expt) | Mr(calc) | ppm  | Miss | Score | Expect | Rank | Peptide                                    |
|----------------------|----------|----------|----------|------|------|-------|--------|------|--------------------------------------------|
| <a href="#">585</a>  | 458.76   | 915.51   | 915.50   | 7.92 | 0    | 35    | 0.0042 | 1    | K.LGVTANDVK.N                              |
| <a href="#">4174</a> | 879.47   | 1756.93  | 1756.91  | 6.39 | 0    | 57    | 1e-005 | 1    | K.VIVVGNPANTNCLTASK.S <a href="#">4173</a> |

253. [COLL1\\_HUMAN](#) Mass: 14674 Score: 90 Queries matched: 2 empAI: 0.27

Colipase-like protein 1 OS=Homo sapiens GN=CLPSL1 PE=2 SV=1

| Query                | Observed | Mr(expt) | Mr(calc) | ppm   | Miss | Score | Expect   | Rank | Peptide                              |
|----------------------|----------|----------|----------|-------|------|-------|----------|------|--------------------------------------|
| <a href="#">3150</a> | 714.26   | 1426.50  | 1426.50  | -2.81 | 0    | 59    | 1.2e-006 | 1    | R.NQDCETGCCQR.A <a href="#">3151</a> |

254. [MYOF\\_HUMAN](#) Mass: 236100 Score: 89 Queries matched: 4 empAI: 0.03

Myoferlin OS=Homo sapiens GN=MYOF PE=1 SV=1

| Query                | Observed | Mr(expt) | Mr(calc) | ppm   | Miss | Score | Expect | Rank | Peptide                                             |
|----------------------|----------|----------|----------|-------|------|-------|--------|------|-----------------------------------------------------|
| <a href="#">461</a>  | 448.72   | 895.42   | 895.42   | -2.55 | 0    | 43    | 0.0004 | 1    | K.CGQYIQK.G <a href="#">462</a> <a href="#">463</a> |
| <a href="#">3485</a> | 765.37   | 1528.73  | 1528.72  | 7.46  | 0    | 38    | 0.001  | 1    | R.ELPDSVPQECTVR.I                                   |

255. [APOD\\_HUMAN](#) Mass: 21547 Score: 89 Queries matched: 1 empAI: 0.18

Apolipoprotein D OS=Homo sapiens GN=APOD PE=1 SV=1

| Query                | Observed | Mr(expt) | Mr(calc) | ppm   | Miss | Score | Expect   | Rank | Peptide         |
|----------------------|----------|----------|----------|-------|------|-------|----------|------|-----------------|
| <a href="#">2591</a> | 646.80   | 1291.58  | 1291.59  | -9.46 | 0    | 89    | 4.1e-009 | 1    | K.MTVTDQVNCPK.L |

256. [PTTG\\_HUMAN](#) Mass: 21109 Score: 89 Queries matched: 2 empAI: 0.18

Pituitary tumor-transforming gene 1 protein-interacting protein OS=Homo sapiens GN=PTTG1IP PE=1 SV=1

| Query                                                                                            | Observed                    | Mr(expt)     | Mr(calc)  | ppm                | Miss        | Score | Expect   | Rank | Peptide                                                              |
|--------------------------------------------------------------------------------------------------|-----------------------------|--------------|-----------|--------------------|-------------|-------|----------|------|----------------------------------------------------------------------|
| <a href="#">4621</a>                                                                             | 996.01                      | 1990.00      | 1989.99   | 3.11               | 0           | 89    | 7.5e-009 | 1    | <a href="#">K.ACLDYPVTSVLPPASLCK.L</a> <a href="#">4620</a>          |
| <hr/>                                                                                            |                             |              |           |                    |             |       |          |      |                                                                      |
| 257.                                                                                             | <a href="#">BAIP2_HUMAN</a> | Mass: 61115  | Score: 88 | Queries matched: 6 | emPAI: 0.13 |       |          |      |                                                                      |
| Brain-specific angiogenesis inhibitor 1-associated protein 2 OS=Homo sapiens GN=BAIAP2 PE=1 SV=1 |                             |              |           |                    |             |       |          |      |                                                                      |
| Query                                                                                            | Observed                    | Mr(expt)     | Mr(calc)  | ppm                | Miss        | Score | Expect   | Rank | Peptide                                                              |
| <a href="#">101</a>                                                                              | 410.21                      | 818.41       | 818.41    | -1.65              | 0           | 25    | 0.041    | 1    | <a href="#">K.TALTEER.R</a> <a href="#">103</a>                      |
| <a href="#">116</a>                                                                              | 412.70                      | 823.38       | 823.38    | -0.59              | 0           | 45    | 0.00016  | 1    | <a href="#">K.YQTEQR.S</a> <a href="#">117</a> <a href="#">118</a>   |
| <a href="#">1352</a>                                                                             | 531.77                      | 1061.52      | 1061.53   | -6.57              | 1           | 8     | 1.6      | 2    | <a href="#">K.NSAAYHSK GK.E</a>                                      |
| <hr/>                                                                                            |                             |              |           |                    |             |       |          |      |                                                                      |
| 258.                                                                                             | <a href="#">AT8A2_HUMAN</a> | Mass: 130641 | Score: 87 | Queries matched: 2 | emPAI: 0.03 |       |          |      |                                                                      |
| Probable phospholipid-transporting ATPase IB OS=Homo sapiens GN=ATP8A2 PE=2 SV=2                 |                             |              |           |                    |             |       |          |      |                                                                      |
| Query                                                                                            | Observed                    | Mr(expt)     | Mr(calc)  | ppm                | Miss        | Score | Expect   | Rank | Peptide                                                              |
| <a href="#">1840</a>                                                                             | 576.31                      | 1150.61      | 1150.62   | -9.64              | 0           | 5     | 2.3      | 6    | <a href="#">K.VYQEASTILK.D</a>                                       |
| <a href="#">2771</a>                                                                             | 666.35                      | 1330.68      | 1330.67   | 2.65               | 0           | 87    | 1.7e-008 | 1    | <a href="#">R.TSNLNEELGQVK.Y</a>                                     |
| <hr/>                                                                                            |                             |              |           |                    |             |       |          |      |                                                                      |
| 259.                                                                                             | <a href="#">SORT_HUMAN</a>  | Mass: 92979  | Score: 86 | Queries matched: 3 | emPAI: 0.04 |       |          |      |                                                                      |
| Sortilin OS=Homo sapiens GN=SORT1 PE=1 SV=3                                                      |                             |              |           |                    |             |       |          |      |                                                                      |
| Query                                                                                            | Observed                    | Mr(expt)     | Mr(calc)  | ppm                | Miss        | Score | Expect   | Rank | Peptide                                                              |
| <a href="#">2111</a>                                                                             | 603.74                      | 1205.46      | 1205.46   | 1.33               | 0           | 52    | 5.6e-006 | 1    | <a href="#">R.SAPGEDEECGR.V</a> <a href="#">2112</a>                 |
| <a href="#">3209</a>                                                                             | 722.89                      | 1443.77      | 1443.78   | -8.29              | 1           | 0     |          | 6    | 4 <a href="#">K.VVLTAEVSGGSRGGR.I</a>                                |
| <hr/>                                                                                            |                             |              |           |                    |             |       |          |      |                                                                      |
| 260.                                                                                             | <a href="#">P2RX4_HUMAN</a> | Mass: 44139  | Score: 86 | Queries matched: 4 | emPAI: 0.18 |       |          |      |                                                                      |
| P2X purinoceptor 4 OS=Homo sapiens GN=P2RX4 PE=1 SV=2                                            |                             |              |           |                    |             |       |          |      |                                                                      |
| Query                                                                                            | Observed                    | Mr(expt)     | Mr(calc)  | ppm                | Miss        | Score | Expect   | Rank | Peptide                                                              |
| <a href="#">268</a>                                                                              | 428.70                      | 855.38       | 855.38    | 0.90               | 0           | 29    | 0.0043   | 1    | <a href="#">K.SCIYDAK.T</a>                                          |
| <a href="#">482</a>                                                                              | 451.72                      | 901.43       | 901.43    | -0.01              | 0           | 43    | 0.00026  | 1    | <a href="#">R.DLAGNEQR.T</a> <a href="#">481</a> <a href="#">483</a> |
| <hr/>                                                                                            |                             |              |           |                    |             |       |          |      |                                                                      |
| 261.                                                                                             | <a href="#">REPS2_HUMAN</a> | Mass: 72002  | Score: 85 | Queries matched: 1 | emPAI: 0.05 |       |          |      |                                                                      |
| RalBP1-associated Eps domain-containing protein 2 OS=Homo sapiens GN=REPS2 PE=1 SV=2             |                             |              |           |                    |             |       |          |      |                                                                      |
| Query                                                                                            | Observed                    | Mr(expt)     | Mr(calc)  | ppm                | Miss        | Score | Expect   | Rank | Peptide                                                              |
| <a href="#">3512</a>                                                                             | 770.35                      | 1538.69      | 1538.69   | -2.01              | 0           | 85    | 9e-009   | 1    | <a href="#">R.CAGAAGGGPGSGPPEAAR.V</a>                               |
| <hr/>                                                                                            |                             |              |           |                    |             |       |          |      |                                                                      |
| 262.                                                                                             | <a href="#">SMIM1_HUMAN</a> | Mass: 8915   | Score: 85 | Queries matched: 1 | emPAI: 0.46 |       |          |      |                                                                      |
| Small integral membrane protein 1 OS=Homo sapiens GN=SMIM1 PE=1 SV=1                             |                             |              |           |                    |             |       |          |      |                                                                      |
| Query                                                                                            | Observed                    | Mr(expt)     | Mr(calc)  | ppm                | Miss        | Score | Expect   | Rank | Peptide                                                              |
| <a href="#">3610</a>                                                                             | 782.88                      | 1563.74      | 1563.74   | 3.13               | 0           | 85    | 1.9e-008 | 1    | <a href="#">R.DGVSLGAVSSTEEASR.C</a>                                 |
| <hr/>                                                                                            |                             |              |           |                    |             |       |          |      |                                                                      |
| 263.                                                                                             | <a href="#">LEG3_HUMAN</a>  | Mass: 34927  | Score: 85 | Queries matched: 1 | emPAI: 0.11 |       |          |      |                                                                      |
| Protein lifeguard 3 OS=Homo sapiens GN=TMBIM1 PE=1 SV=2                                          |                             |              |           |                    |             |       |          |      |                                                                      |
| Query                                                                                            | Observed                    | Mr(expt)     | Mr(calc)  | ppm                | Miss        | Score | Expect   | Rank | Peptide                                                              |
| <a href="#">3511</a>                                                                             | 769.33                      | 1536.65      | 1536.65   | 2.34               | 0           | 85    | 5.5e-009 | 1    | <a href="#">R.AVSDSFGPGEWDDR.K</a>                                   |
| <hr/>                                                                                            |                             |              |           |                    |             |       |          |      |                                                                      |
| 264.                                                                                             | <a href="#">SORCN_HUMAN</a> | Mass: 21947  | Score: 85 | Queries matched: 2 | emPAI: 0.17 |       |          |      |                                                                      |
| Sorcin OS=Homo sapiens GN=SRI PE=1 SV=1                                                          |                             |              |           |                    |             |       |          |      |                                                                      |
| Query                                                                                            | Observed                    | Mr(expt)     | Mr(calc)  | ppm                | Miss        | Score | Expect   | Rank | Peptide                                                              |
| <a href="#">2095</a>                                                                             | 601.31                      | 1200.60      | 1200.60   | -1.55              | 0           | 53    | 3.1e-005 | 1    | <a href="#">R.SGTVPQELQK.A</a> <a href="#">2096</a>                  |
| <hr/>                                                                                            |                             |              |           |                    |             |       |          |      |                                                                      |
| 265.                                                                                             | <a href="#">PGK2_HUMAN</a>  | Mass: 45166  | Score: 85 | Queries matched: 4 | emPAI: 0.17 |       |          |      |                                                                      |
| Phosphoglycerate kinase 2 OS=Homo sapiens GN=PGK2 PE=1 SV=3                                      |                             |              |           |                    |             |       |          |      |                                                                      |

| Query                                                                                                 | Observed                    | Mr(expt)    | Mr(calc)           | ppm                | Miss         | Score | Expect   | Rank | Peptide                                        |
|-------------------------------------------------------------------------------------------------------|-----------------------------|-------------|--------------------|--------------------|--------------|-------|----------|------|------------------------------------------------|
| <a href="#">913</a>                                                                                   | 494.25                      | 986.49      | 986.49             | 1.63               | 0            | 44    | 0.00026  | 1    | <a href="#">K.NQITNNQR.I 912</a>               |
| <a href="#">1017</a>                                                                                  | 503.73                      | 1005.45     | 1005.44            | 2.90               | 0            | 38    | 0.00064  | 1    | <a href="#">K.DCVGAEVEK.A 1016</a>             |
| <hr/>                                                                                                 |                             |             |                    |                    |              |       |          |      |                                                |
| 266.                                                                                                  | <a href="#">GNA11_HUMAN</a> | Mass: 42382 | Score: 85          | Queries matched: 4 | empPAI: 0.18 |       |          |      |                                                |
| Guanine nucleotide-binding protein subunit alpha-11 OS=Homo sapiens GN=GNA11 PE=1 SV=2                |                             |             |                    |                    |              |       |          |      |                                                |
| Query                                                                                                 | Observed                    | Mr(expt)    | Mr(calc)           | ppm                | Miss         | Score | Expect   | Rank | Peptide                                        |
| <a href="#">356</a>                                                                                   | 439.21                      | 876.41      | 876.41             | -1.58              | 0            | 51    | 6.6e-005 | 1    | <a href="#">R.MVDVGGQR.S 355</a>               |
| <a href="#">1198</a>                                                                                  | 520.75                      | 1039.48     | 1039.48            | -1.55              | 0            | 29    | 0.0078   | 1    | <a href="#">R.EYQLSDSAK.Y 1197</a>             |
| Proteins matching the same set of peptides:                                                           |                             |             |                    |                    |              |       |          |      |                                                |
| <a href="#">GNA14_HUMAN</a>                                                                           | Mass: 42000                 | Score: 85   | Queries matched: 4 |                    |              |       |          |      |                                                |
| Guanine nucleotide-binding protein subunit alpha-14 OS=Homo sapiens GN=GNA14 PE=2 SV=1                |                             |             |                    |                    |              |       |          |      |                                                |
| <hr/>                                                                                                 |                             |             |                    |                    |              |       |          |      |                                                |
| 267.                                                                                                  | <a href="#">SO2A1_HUMAN</a> | Mass: 71367 | Score: 82          | Queries matched: 1 | empPAI: 0.05 |       |          |      |                                                |
| Solute carrier organic anion transporter family member 2A1 OS=Homo sapiens GN=SLCO2A1 PE=1 SV=2       |                             |             |                    |                    |              |       |          |      |                                                |
| Query                                                                                                 | Observed                    | Mr(expt)    | Mr(calc)           | ppm                | Miss         | Score | Expect   | Rank | Peptide                                        |
| <a href="#">2454</a>                                                                                  | 633.80                      | 1265.59     | 1265.58            | 4.08               | 0            | 82    | 4.3e-008 | 1    | <a href="#">K.LGASQGSdTSTR.A</a>               |
| <hr/>                                                                                                 |                             |             |                    |                    |              |       |          |      |                                                |
| 268.                                                                                                  | <a href="#">HYES_HUMAN</a>  | Mass: 63316 | Score: 82          | Queries matched: 4 | empPAI: 0.06 |       |          |      |                                                |
| Bifunctional epoxide hydrolase 2 OS=Homo sapiens GN=EPHX2 PE=1 SV=2                                   |                             |             |                    |                    |              |       |          |      |                                                |
| Query                                                                                                 | Observed                    | Mr(expt)    | Mr(calc)           | ppm                | Miss         | Score | Expect   | Rank | Peptide                                        |
| <a href="#">230</a>                                                                                   | 423.21                      | 844.41      | 844.40             | 1.60               | 0            | 54    | 2.3e-005 | 1    | <a href="#">K.GGPEGATTR.L 229 231</a>          |
| <a href="#">888</a>                                                                                   | 491.75                      | 981.48      | 981.48             | -0.45              | 0            | 15    | 0.25     | 2    | <a href="#">K.EMVTFLDK.L</a>                   |
| <hr/>                                                                                                 |                             |             |                    |                    |              |       |          |      |                                                |
| 269.                                                                                                  | <a href="#">GTR5_HUMAN</a>  | Mass: 55394 | Score: 81          | Queries matched: 3 | empPAI: 0.22 |       |          |      |                                                |
| Solute carrier family 2, facilitated glucose transporter member 5 OS=Homo sapiens GN=SLC2A5 PE=1 SV=1 |                             |             |                    |                    |              |       |          |      |                                                |
| Query                                                                                                 | Observed                    | Mr(expt)    | Mr(calc)           | ppm                | Miss         | Score | Expect   | Rank | Peptide                                        |
| <a href="#">154</a>                                                                                   | 415.27                      | 828.52      | 828.52             | 8.09               | 1            | 43    | 0.00014  | 1    | <a href="#">K.KALQTLR.G</a>                    |
| <a href="#">170</a>                                                                                   | 417.69                      | 833.37      | 833.37             | 6.60               | 0            | 28    | 0.0059   | 1    | <a href="#">R.GWDSVDR.E</a>                    |
| <a href="#">513</a>                                                                                   | 453.28                      | 904.54      | 904.54             | -1.43              | 0            | 45    | 7.1e-005 | 1    | <a href="#">K.AAGFISVLK.L</a>                  |
| <hr/>                                                                                                 |                             |             |                    |                    |              |       |          |      |                                                |
| 270.                                                                                                  | <a href="#">CLIC1_HUMAN</a> | Mass: 27248 | Score: 81          | Queries matched: 2 | empPAI: 0.14 |       |          |      |                                                |
| Chloride intracellular channel protein 1 OS=Homo sapiens GN=CLIC1 PE=1 SV=4                           |                             |             |                    |                    |              |       |          |      |                                                |
| Query                                                                                                 | Observed                    | Mr(expt)    | Mr(calc)           | ppm                | Miss         | Score | Expect   | Rank | Peptide                                        |
| <a href="#">2764</a>                                                                                  | 664.83                      | 1327.64     | 1327.64            | 1.69               | 0            | 81    | 5.5e-008 | 1    | <a href="#">K.NSNPALNDNLEK.G</a>               |
| <a href="#">4395</a>                                                                                  | 922.99                      | 1843.97     | 1843.97            | 0.82               | 0            | 17    | 0.12     | 1    | <a href="#">K.LAALNPESNTAGLDIFAK.F</a>         |
| <hr/>                                                                                                 |                             |             |                    |                    |              |       |          |      |                                                |
| 271.                                                                                                  | <a href="#">ZDHC2_HUMAN</a> | Mass: 42906 | Score: 81          | Queries matched: 5 | empPAI: 0.18 |       |          |      |                                                |
| Palmitoyltransferase ZDHHC2 OS=Homo sapiens GN=ZDHHC2 PE=2 SV=1                                       |                             |             |                    |                    |              |       |          |      |                                                |
| Query                                                                                                 | Observed                    | Mr(expt)    | Mr(calc)           | ppm                | Miss         | Score | Expect   | Rank | Peptide                                        |
| <a href="#">396</a>                                                                                   | 443.72                      | 885.43      | 885.43             | 1.61               | 0            | 36    | 0.0015   | 1    | <a href="#">M.APSGPGSSAR.R 397 398</a>         |
| <a href="#">1151</a>                                                                                  | 517.24                      | 1032.47     | 1032.47            | 7.76               | 0            | 32    | 0.0036   | 1    | <a href="#">-.MAPSGPGSSAR.R</a>                |
| <a href="#">3289</a>                                                                                  | 733.31                      | 1464.61     | 1464.62            | -8.11              | 0            | 1     | 0.77     | 1    | <a href="#">K.AGMSNPALTMENET.-</a>             |
| <hr/>                                                                                                 |                             |             |                    |                    |              |       |          |      |                                                |
| 272.                                                                                                  | <a href="#">DCD_HUMAN</a>   | Mass: 11391 | Score: 80          | Queries matched: 4 | empPAI: 0.35 |       |          |      |                                                |
| Dermcidin OS=Homo sapiens GN=DCD PE=1 SV=2                                                            |                             |             |                    |                    |              |       |          |      |                                                |
| Query                                                                                                 | Observed                    | Mr(expt)    | Mr(calc)           | ppm                | Miss         | Score | Expect   | Rank | Peptide                                        |
| <a href="#">1675</a>                                                                                  | 564.77                      | 1127.52     | 1127.52            | 0.57               | 0            | 51    | 3.8e-005 | 1    | <a href="#">K.ENAGEDPGLAR.Q 1673 1674 1677</a> |
| <hr/>                                                                                                 |                             |             |                    |                    |              |       |          |      |                                                |
| 273.                                                                                                  | <a href="#">CC181_HUMAN</a> | Mass: 60408 | Score: 80          | Queries matched: 7 | empPAI: 0.06 |       |          |      |                                                |



Coiled-coil domain-containing protein 181 OS=Homo sapiens GN=CCDC181 PE=2 SV=1

| Query               | Observed | Mr(expt) | Mr(calc) | ppm   | Miss | Score | Expect | Rank | Peptide                                                                                                        |
|---------------------|----------|----------|----------|-------|------|-------|--------|------|----------------------------------------------------------------------------------------------------------------|
| <a href="#">18</a>  | 401.73   | 801.44   | 801.43   | 2.65  | 1    | 19    | 0.22   | 9    | K.QLEEKR.E                                                                                                     |
| <a href="#">505</a> | 452.73   | 903.45   | 903.45   | -0.96 | 1    | 36    | 0.0028 | 2    | K.IEEEEK.K <a href="#">501</a> <a href="#">502</a> <a href="#">503</a> <a href="#">504</a> <a href="#">506</a> |

274. [TRI34\\_HUMAN](#) Score: 80 Queries matched: 7

Tripartite motif-containing protein 34 OS=Homo sapiens GN=TRIM34 PE=1 SV=2

| Query               | Observed | Mr(expt) | Mr(calc) | ppm   | Miss | Score | Expect | Rank | Peptide                                                                                                         |
|---------------------|----------|----------|----------|-------|------|-------|--------|------|-----------------------------------------------------------------------------------------------------------------|
| <a href="#">96</a>  | 409.25   | 816.48   | 816.49   | -8.61 | 1    | 9     | 0.67   | 6    | K.KPKMVSK.K                                                                                                     |
| <a href="#">505</a> | 452.73   | 903.45   | 903.45   | -0.96 | 1    | 36    | 0.0028 | 2    | R.LEEEEEK.T <a href="#">501</a> <a href="#">502</a> <a href="#">503</a> <a href="#">504</a> <a href="#">506</a> |

275. [RRAS\\_HUMAN](#) Mass: 23637 Score: 80 Queries matched: 3 emPAI: 0.16

Ras-related protein R-Ras OS=Homo sapiens GN=RRAS PE=1 SV=1

| Query                | Observed | Mr(expt) | Mr(calc) | ppm  | Miss | Score | Expect   | Rank | Peptide                                                      |
|----------------------|----------|----------|----------|------|------|-------|----------|------|--------------------------------------------------------------|
| <a href="#">3986</a> | 848.42   | 1694.83  | 1694.83  | 2.75 | 0    | 51    | 6.1e-005 | 1    | K.YQEQLPPSPPSAPR.K <a href="#">3984</a> <a href="#">3985</a> |

276. [PRDX1\\_HUMAN](#) Mass: 22324 Score: 79 Queries matched: 4 emPAI: 0.37

Peroxiredoxin-1 OS=Homo sapiens GN=PRDX1 PE=1 SV=1

| Query                | Observed | Mr(expt) | Mr(calc) | ppm   | Miss | Score | Expect   | Rank | Peptide                              |
|----------------------|----------|----------|----------|-------|------|-------|----------|------|--------------------------------------|
| <a href="#">102</a>  | 410.21   | 818.41   | 818.41   | -1.15 | 0    | 5     | 3.5      | 2    | R.SVDETLR.L                          |
| <a href="#">1914</a> | 582.79   | 1163.57  | 1163.56  | 8.33  | 0    | 34    | 0.0032   | 1    | K.ATAVMPDGQFK.D <a href="#">1913</a> |
| <a href="#">2151</a> | 606.34   | 1210.67  | 1210.67  | 2.80  | 0    | 49    | 7.6e-005 | 1    | R.QITVNDLPVGR.S                      |

277. [PR8\\_HUMAN](#) Mass: 45768 Score: 79 Queries matched: 1 emPAI: 0.08

26S protease regulatory subunit 8 OS=Homo sapiens GN=PSMC5 PE=1 SV=1

| Query                | Observed | Mr(expt) | Mr(calc) | ppm  | Miss | Score | Expect   | Rank | Peptide           |
|----------------------|----------|----------|----------|------|------|-------|----------|------|-------------------|
| <a href="#">2580</a> | 645.80   | 1289.59  | 1289.58  | 2.96 | 0    | 79    | 5.2e-008 | 1    | R.LEGGSGGDSEVQR.T |

278. [KI2L4\\_HUMAN](#) Score: 78 Queries matched: 14

Killer cell immunoglobulin-like receptor 2DL4 OS=Homo sapiens GN=KIR2DL4 PE=1 SV=3

| Query               | Observed | Mr(expt) | Mr(calc) | ppm  | Miss | Score | Expect | Rank | Peptide                                                                                                                                                                                                                                                                          |
|---------------------|----------|----------|----------|------|------|-------|--------|------|----------------------------------------------------------------------------------------------------------------------------------------------------------------------------------------------------------------------------------------------------------------------------------|
| <a href="#">412</a> | 443.76   | 885.51   | 885.50   | 3.04 | 1    | 31    | 0.0089 | 2    | R.KITGPSQR.S <a href="#">399</a> <a href="#">400</a> <a href="#">401</a> <a href="#">402</a> <a href="#">403</a> <a href="#">404</a> <a href="#">405</a> <a href="#">407</a> <a href="#">408</a> <a href="#">409</a> <a href="#">410</a> <a href="#">411</a> <a href="#">413</a> |

279. [GNAQ\\_HUMAN](#) Mass: 42400 Score: 78 Queries matched: 5 emPAI: 0.18

Guanine nucleotide-binding protein G(q) subunit alpha OS=Homo sapiens GN=GNAQ PE=1 SV=4

| Query                | Observed | Mr(expt) | Mr(calc) | ppm   | Miss | Score | Expect   | Rank | Peptide                                                 |
|----------------------|----------|----------|----------|-------|------|-------|----------|------|---------------------------------------------------------|
| <a href="#">356</a>  | 439.21   | 876.41   | 876.41   | -1.58 | 0    | 51    | 6.6e-005 | 1    | R.MVDVGGQR.S <a href="#">355</a>                        |
| <a href="#">1388</a> | 535.75   | 1069.49  | 1069.49  | -0.67 | 0    | 23    | 0.021    | 1    | R.EYQLSDSTK.Y <a href="#">1387</a> <a href="#">1389</a> |

280. [RAB14\\_HUMAN](#) Mass: 24110 Score: 77 Queries matched: 2 emPAI: 0.34

Ras-related protein Rab-14 OS=Homo sapiens GN=RAB14 PE=1 SV=4

| Query                | Observed | Mr(expt) | Mr(calc) | ppm   | Miss | Score | Expect   | Rank | Peptide         |
|----------------------|----------|----------|----------|-------|------|-------|----------|------|-----------------|
| <a href="#">352</a>  | 437.25   | 872.49   | 872.50   | -4.66 | 0    | 25    | 0.032    | 1    | R.IIEVSGQK.I    |
| <a href="#">2701</a> | 658.83   | 1315.65  | 1315.65  | 1.50  | 0    | 74    | 3.2e-007 | 1    | K.LQIWDTAGQER.F |

281. [IGSF21\\_HUMAN](#) Score: 77 Queries matched: 8

Immunoglobulin superfamily member 21 OS=Homo sapiens GN=IGSF21 PE=2 SV=1

| Query                | Observed | Mr(expt) | Mr(calc) | ppm  | Miss | Score | Expect | Rank | Peptide                                                                                                                                                            |
|----------------------|----------|----------|----------|------|------|-------|--------|------|--------------------------------------------------------------------------------------------------------------------------------------------------------------------|
| <a href="#">1817</a> | 574.29   | 1146.56  | 1146.55  | 3.65 | 0    | 35    | 0.0026 | 2    | R.TPSSDGTVEVR.A <a href="#">1809</a> <a href="#">1810</a> <a href="#">1812</a> <a href="#">1813</a> <a href="#">1814</a> <a href="#">1815</a> <a href="#">1816</a> |

|                                                                                   |                             |              |           |                    |             |             |      |                                                                                           |
|-----------------------------------------------------------------------------------|-----------------------------|--------------|-----------|--------------------|-------------|-------------|------|-------------------------------------------------------------------------------------------|
| 282.                                                                              | <a href="#">TSN8_HUMAN</a>  | Mass: 26711  | Score: 76 | Queries matched: 2 | emPAI: 0.14 |             |      |                                                                                           |
| Tetraspanin-8 OS=Homo sapiens GN=TSN8 PE=1 SV=1                                   |                             |              |           |                    |             |             |      |                                                                                           |
| Query                                                                             | Observed                    | Mr(expt)     | Mr(calc)  | ppm                | Miss Score  | Expect      | Rank | Peptide                                                                                   |
| <a href="#">1168</a>                                                              | 517.77                      | 1033.53      | 1033.53   | -2.81              | 0           | 52 5.5e-005 | 1    | <a href="#">K.LLSATGESEK.Q</a> <a href="#">1169</a>                                       |
| 283.                                                                              | <a href="#">VIGLN_HUMAN</a> | Mass: 141995 | Score: 76 | Queries matched: 1 | emPAI: 0.03 |             |      |                                                                                           |
| Vigilin OS=Homo sapiens GN=HDLBP PE=1 SV=2                                        |                             |              |           |                    |             |             |      |                                                                                           |
| Query                                                                             | Observed                    | Mr(expt)     | Mr(calc)  | ppm                | Miss Score  | Expect      | Rank | Peptide                                                                                   |
| <a href="#">2474</a>                                                              | 635.33                      | 1268.64      | 1268.64   | 0.58               | 0           | 76 1.5e-007 | 1    | <a href="#">R.IEGDPQGVQAK.R</a>                                                           |
| 284.                                                                              | <a href="#">MIF_HUMAN</a>   | Mass: 12639  | Score: 76 | Queries matched: 2 | emPAI: 0.72 |             |      |                                                                                           |
| Macrophage migration inhibitory factor OS=Homo sapiens GN=MIF PE=1 SV=4           |                             |              |           |                    |             |             |      |                                                                                           |
| Query                                                                             | Observed                    | Mr(expt)     | Mr(calc)  | ppm                | Miss Score  | Expect      | Rank | Peptide                                                                                   |
| <a href="#">1228</a>                                                              | 522.80                      | 1043.58      | 1043.58   | -0.62              | 0           | 48 0.00012  | 1    | <a href="#">K.LLCGLLAER.L</a>                                                             |
| <a href="#">2548</a>                                                              | 644.35                      | 1286.69      | 1286.68   | 5.21               | 0           | 49 0.00011  | 1    | <a href="#">M.PMFIVNTNVPR.A</a>                                                           |
| 285.                                                                              | <a href="#">PLST_HUMAN</a>  | Mass: 71279  | Score: 75 | Queries matched: 4 | emPAI: 0.11 |             |      |                                                                                           |
| Plastin-3 OS=Homo sapiens GN=PLS3 PE=1 SV=4                                       |                             |              |           |                    |             |             |      |                                                                                           |
| Query                                                                             | Observed                    | Mr(expt)     | Mr(calc)  | ppm                | Miss Score  | Expect      | Rank | Peptide                                                                                   |
| <a href="#">1482</a>                                                              | 545.23                      | 1088.46      | 1088.46   | -0.22              | 0           | 40 0.00016  | 1    | <a href="#">K.ALENDPDCR.H</a> <a href="#">1483</a>                                        |
| <a href="#">1652</a>                                                              | 562.27                      | 1122.52      | 1122.52   | 0.33               | 0           | 2 3.9       | 4    | <a href="#">M.DEMATQISK.D</a>                                                             |
| <a href="#">3412</a>                                                              | 751.88                      | 1501.75      | 1501.74   | 1.12               | 0           | 31 0.0072   | 1    | <a href="#">K.MINLSVPDTIDER.A</a>                                                         |
| 286.                                                                              | <a href="#">PTPRJ_HUMAN</a> | Mass: 147048 | Score: 75 | Queries matched: 3 | emPAI: 0.05 |             |      |                                                                                           |
| Receptor-type tyrosine-protein phosphatase eta OS=Homo sapiens GN=PTPRJ PE=1 SV=3 |                             |              |           |                    |             |             |      |                                                                                           |
| Query                                                                             | Observed                    | Mr(expt)     | Mr(calc)  | ppm                | Miss Score  | Expect      | Rank | Peptide                                                                                   |
| <a href="#">926</a>                                                               | 495.78                      | 989.54       | 989.54    | -1.82              | 0           | 7 2.1       | 7    | <a href="#">R.SQSLSEVLK.Y</a>                                                             |
| <a href="#">942</a>                                                               | 497.27                      | 992.53       | 992.53    | 0.79               | 0           | 69 7.9e-007 | 1    | <a href="#">R.TGTFIADR.L</a>                                                              |
| <a href="#">2804</a>                                                              | 669.89                      | 1337.76      | 1337.76   | 0.73               | 0           | 25 0.01     | 1    | <a href="#">K.VITEPIPVSDLR.V</a>                                                          |
| 287.                                                                              | <a href="#">FLOT2_HUMAN</a> | Mass: 47434  | Score: 75 | Queries matched: 9 | emPAI: 0.16 |             |      |                                                                                           |
| Flotillin-2 OS=Homo sapiens GN=FLOT2 PE=1 SV=2                                    |                             |              |           |                    |             |             |      |                                                                                           |
| Query                                                                             | Observed                    | Mr(expt)     | Mr(calc)  | ppm                | Miss Score  | Expect      | Rank | Peptide                                                                                   |
| <a href="#">359</a>                                                               | 439.74                      | 877.46       | 877.46    | 2.61               | 1           | 7 1.8       | 5    | <a href="#">K.KEMLDVK.F</a> <a href="#">357</a> <a href="#">358</a>                       |
| <a href="#">494</a>                                                               | 451.76                      | 901.50       | 901.50    | -0.26              | 0           | 43 0.0005   | 1    | <a href="#">K.TQTAVVQR.D</a> <a href="#">493</a>                                          |
| <a href="#">571</a>                                                               | 457.24                      | 912.46       | 912.47    | -2.50              | 0           | 24 0.021    | 1    | <a href="#">R.EVAAPDVGR.M</a> <a href="#">568</a> <a href="#">569</a> <a href="#">570</a> |
| 288.                                                                              | <a href="#">RB39B_HUMAN</a> | Mass: 24835  | Score: 74 | Queries matched: 3 | emPAI: 0.15 |             |      |                                                                                           |
| Ras-related protein Rab-39B OS=Homo sapiens GN=RAB39B PE=1 SV=1                   |                             |              |           |                    |             |             |      |                                                                                           |
| Query                                                                             | Observed                    | Mr(expt)     | Mr(calc)  | ppm                | Miss Score  | Expect      | Rank | Peptide                                                                                   |
| <a href="#">524</a>                                                               | 454.20                      | 906.38       | 906.39    | -5.08              | 0           | 8 0.4       | 1    | <a href="#">K.CDLLTQR.Q</a>                                                               |
| <a href="#">1129</a>                                                              | 515.28                      | 1028.54      | 1028.54   | 4.35               | 1           | 11 0.82     | 3    | <a href="#">R.SITRAYR.N</a>                                                               |
| <a href="#">2701</a>                                                              | 658.83                      | 1315.65      | 1315.65   | 1.50               | 0           | 74 3.2e-007 | 1    | <a href="#">K.LQIWDTAGQER.F</a>                                                           |
| 289.                                                                              | <a href="#">RAB6A_HUMAN</a> | Mass: 23692  | Score: 74 | Queries matched: 3 | emPAI: 0.16 |             |      |                                                                                           |
| Ras-related protein Rab-6A OS=Homo sapiens GN=RAB6A PE=1 SV=3                     |                             |              |           |                    |             |             |      |                                                                                           |
| Query                                                                             | Observed                    | Mr(expt)     | Mr(calc)  | ppm                | Miss Score  | Expect      | Rank | Peptide                                                                                   |
| <a href="#">1249</a>                                                              | 523.76                      | 1045.51      | 1045.50   | 8.89               | 0           | 1 9.4       | 5    | <a href="#">R.QVSIEGER.K</a>                                                              |
| <a href="#">2701</a>                                                              | 658.83                      | 1315.65      | 1315.65   | 1.50               | 0           | 74 3.2e-007 | 1    | <a href="#">R.LQLWDTAGQER.F</a>                                                           |
| <a href="#">3272</a>                                                              | 731.35                      | 1460.68      | 1460.69   | -7.92              | 0           | 4 2.5       | 1    | <a href="#">R.VAAALPGMESTQDR.S</a>                                                        |

|                                                                                                          |                              |              |                    |                                                                   |
|----------------------------------------------------------------------------------------------------------|------------------------------|--------------|--------------------|-------------------------------------------------------------------|
| 290.                                                                                                     | <a href="#">RB33B_HUMAN</a>  | Score: 74    | Queries matched: 1 |                                                                   |
| Ras-related protein Rab-33B OS=Homo sapiens GN=RAB33B PE=1 SV=1                                          |                              |              |                    |                                                                   |
| Query                                                                                                    | Observed                     | Mr(expt)     | Mr(calc)           | ppm Miss Score Expect Rank Peptide                                |
| <a href="#">2701</a>                                                                                     | 658.83                       | 1315.65      | 1315.65            | 1.50 0 74 3.2e-007 1 K.IQLWDTAGQER.F                              |
| 291.                                                                                                     | <a href="#">GP2_HUMAN</a>    | Mass: 61095  | Score: 74          | Queries matched: 2 emPAI: 0.13                                    |
| Pancreatic secretory granule membrane major glycoprotein GP2 OS=Homo sapiens GN=GP2 PE=2 SV=3            |                              |              |                    |                                                                   |
| Query                                                                                                    | Observed                     | Mr(expt)     | Mr(calc)           | ppm Miss Score Expect Rank Peptide                                |
| <a href="#">895</a>                                                                                      | 492.30                       | 982.58       | 982.58             | 2.69 0 51 2.6e-005 1 R.VLDLGPITR.R                                |
| <a href="#">1391</a>                                                                                     | 535.80                       | 1069.58      | 1069.58            | 0.35 0 42 0.00036 1 R.SEVPAIDLAR.V                                |
| 292.                                                                                                     | <a href="#">PEPD_HUMAN</a>   | Mass: 55311  | Score: 74          | Queries matched: 2 emPAI: 0.07                                    |
| Xaa-Pro dipeptidase OS=Homo sapiens GN=PEPD PE=1 SV=3                                                    |                              |              |                    |                                                                   |
| Query                                                                                                    | Observed                     | Mr(expt)     | Mr(calc)           | ppm Miss Score Expect Rank Peptide                                |
| <a href="#">1833</a>                                                                                     | 576.26                       | 1150.50      | 1150.50            | 0.57 0 52 2.1e-005 1 R.GVNTDSGSVCR.E <a href="#">1832</a>         |
| 293.                                                                                                     | <a href="#">SGTA_HUMAN</a>   | Mass: 34270  | Score: 74          | Queries matched: 1 emPAI: 0.11                                    |
| Small glutamine-rich tetratricopeptide repeat-containing protein alpha OS=Homo sapiens GN=SGTA PE=1 SV=1 |                              |              |                    |                                                                   |
| Query                                                                                                    | Observed                     | Mr(expt)     | Mr(calc)           | ppm Miss Score Expect Rank Peptide                                |
| <a href="#">3135</a>                                                                                     | 709.31                       | 1416.60      | 1416.60            | -0.87 0 74 7.1e-008 1 R.TPPSEEDSAEAER.L                           |
| 294.                                                                                                     | <a href="#">PPME1_HUMAN</a>  | Mass: 42687  | Score: 72          | Queries matched: 2 emPAI: 0.09                                    |
| Protein phosphatase methyltransferase 1 OS=Homo sapiens GN=PPME1 PE=1 SV=3                               |                              |              |                    |                                                                   |
| Query                                                                                                    | Observed                     | Mr(expt)     | Mr(calc)           | ppm Miss Score Expect Rank Peptide                                |
| <a href="#">2589</a>                                                                                     | 646.79                       | 1291.57      | 1291.57            | -2.87 0 51 1.7e-005 1 K.QCEGITSPEGSK.S <a href="#">2590</a>       |
| 295.                                                                                                     | <a href="#">AT1A2_HUMAN</a>  | Mass: 113505 | Score: 72          | Queries matched: 2 emPAI: 0.03                                    |
| Sodium/potassium-transporting ATPase subunit alpha-2 OS=Homo sapiens GN=ATP1A2 PE=1 SV=1                 |                              |              |                    |                                                                   |
| Query                                                                                                    | Observed                     | Mr(expt)     | Mr(calc)           | ppm Miss Score Expect Rank Peptide                                |
| <a href="#">1002</a>                                                                                     | 502.27                       | 1002.53      | 1002.52            | 5.90 1 8 1.9 6 K.EKELDELK.K                                       |
| <a href="#">3781</a>                                                                                     | 810.38                       | 1618.75      | 1618.74            | 3.12 0 72 3e-007 1 K.VDNSSLTGESEPQTR.S                            |
| 296.                                                                                                     | <a href="#">FKBP1A_HUMAN</a> | Mass: 12000  | Score: 72          | Queries matched: 2 emPAI: 0.33                                    |
| Peptidyl-prolyl cis-trans isomerase FKBP1A OS=Homo sapiens GN=FKBP1A PE=1 SV=2                           |                              |              |                    |                                                                   |
| Query                                                                                                    | Observed                     | Mr(expt)     | Mr(calc)           | ppm Miss Score Expect Rank Peptide                                |
| <a href="#">2698</a>                                                                                     | 657.84                       | 1313.66      | 1313.66            | -1.20 0 48 0.00012 1 M.GVQVETISPGDGR.T <a href="#">2699</a>       |
| 297.                                                                                                     | <a href="#">ANO7_HUMAN</a>   | Mass: 106661 | Score: 71          | Queries matched: 2 emPAI: 0.03                                    |
| Anoctamin-7 OS=Homo sapiens GN=ANO7 PE=1 SV=2                                                            |                              |              |                    |                                                                   |
| Query                                                                                                    | Observed                     | Mr(expt)     | Mr(calc)           | ppm Miss Score Expect Rank Peptide                                |
| <a href="#">1268</a>                                                                                     | 525.27                       | 1048.53      | 1048.53            | -2.24 0 46 0.00025 1 K.TPPEGPQAPR.L <a href="#">1269</a>          |
| 298.                                                                                                     | <a href="#">UBP14_HUMAN</a>  | Mass: 56489  | Score: 71          | Queries matched: 5 emPAI: 0.07                                    |
| Ubiquitin carboxyl-terminal hydrolase 14 OS=Homo sapiens GN=USP14 PE=1 SV=3                              |                              |              |                    |                                                                   |
| Query                                                                                                    | Observed                     | Mr(expt)     | Mr(calc)           | ppm Miss Score Expect Rank Peptide                                |
| <a href="#">145</a>                                                                                      | 415.23                       | 828.44       | 828.45             | -1.71 0 8 1 2 K.QSPTLQR.N <a href="#">148</a> <a href="#">151</a> |
| <a href="#">2811</a>                                                                                     | 670.78                       | 1339.54      | 1339.54            | -0.20 0 71 8.9e-008 1 K.CTESEEEVTK.G                              |
| <a href="#">3189</a>                                                                                     | 719.83                       | 1437.65      | 1437.64            | 8.23 1 2 2.9 4 K.QDEWIKFDDDK.V                                    |
| 299.                                                                                                     | <a href="#">GNAZ_HUMAN</a>   | Mass: 41411  | Score: 71          | Queries matched: 3 emPAI: 0.09                                    |

Guanine nucleotide-binding protein G(z) subunit alpha OS=Homo sapiens GN=GNAZ PE=2 SV=3

| Query               | Observed | Mr(expt) | Mr(calc) | ppm   | Miss | Score | Expect   | Rank | Peptide                          |
|---------------------|----------|----------|----------|-------|------|-------|----------|------|----------------------------------|
| <a href="#">356</a> | 439.21   | 876.41   | 876.41   | -1.58 | 0    | 51    | 6.6e-005 | 1    | K.MVDVGGQR.S <a href="#">355</a> |
| <a href="#">595</a> | 461.23   | 920.44   | 920.44   | 0.77  | 0    | 1     | 7.7      | 9    | R.QFEDLNR.N                      |

300. [IMP1\\_HUMAN](#) Mass: 30568 Score: 71 Queries matched: 1 emPAI: 0.12

Inositol monophosphatase 1 OS=Homo sapiens GN=IMP1 PE=1 SV=1

| Query                | Observed | Mr(expt) | Mr(calc) | ppm   | Miss | Score | Expect | Rank | Peptide         |
|----------------------|----------|----------|----------|-------|------|-------|--------|------|-----------------|
| <a href="#">2560</a> | 644.84   | 1287.66  | 1287.67  | -1.67 | 0    | 71    | 7e-007 | 1    | K.LQVSQQEDITK.S |

301. [NPDC1\\_HUMAN](#) Mass: 35122 Score: 70 Queries matched: 4 emPAI: 0.11

Neural proliferation differentiation and control protein 1 OS=Homo sapiens GN=NPDC1 PE=1 SV=2

| Query                | Observed | Mr(expt) | Mr(calc) | ppm   | Miss | Score | Expect | Rank | Peptide                           |
|----------------------|----------|----------|----------|-------|------|-------|--------|------|-----------------------------------|
| <a href="#">112</a>  | 412.23   | 822.44   | 822.43   | 4.83  | 0    | 49    | 8e-005 | 1    | K.APGSPAAPR.I <a href="#">111</a> |
| <a href="#">2820</a> | 671.84   | 1341.66  | 1341.66  | -0.28 | 1    | 5     | 2.1    | 3    | R.QQMLCLERHK.E                    |
| <a href="#">3537</a> | 772.40   | 1542.79  | 1542.78  | 9.02  | 1    | 0     | 7.2    | 2    | K.ADYATAKAPGSPAAPR.I              |

302. [PTPRB\\_HUMAN](#) Score: 69 Queries matched: 1

Receptor-type tyrosine-protein phosphatase beta OS=Homo sapiens GN=PTPRB PE=1 SV=3

| Query               | Observed | Mr(expt) | Mr(calc) | ppm  | Miss | Score | Expect   | Rank | Peptide       |
|---------------------|----------|----------|----------|------|------|-------|----------|------|---------------|
| <a href="#">942</a> | 497.27   | 992.53   | 992.53   | 0.79 | 0    | 69    | 7.9e-007 | 1    | R.TGTFIALDR.I |

Proteins matching the same set of peptides:

[PTPRO\\_HUMAN](#) Score: 69 Queries matched: 1303. [SUIS\\_HUMAN](#) Mass: 210746 Score: 69 Queries matched: 7 emPAI: 0.02

Sucrase-isomaltase, intestinal OS=Homo sapiens GN=SI PE=1 SV=6

| Query                | Observed | Mr(expt) | Mr(calc) | ppm   | Miss | Score | Expect   | Rank | Peptide                                              |
|----------------------|----------|----------|----------|-------|------|-------|----------|------|------------------------------------------------------|
| <a href="#">21</a>   | 402.70   | 803.38   | 803.38   | 0.40  | 0    | 18    | 0.13     | 1    | R.DQPPGYK.L <a href="#">22</a> <a href="#">24</a>    |
| <a href="#">320</a>  | 434.71   | 867.41   | 867.41   | -0.68 | 0    | 19    | 0.067    | 1    | R.STYPTSGR.W <a href="#">321</a> <a href="#">322</a> |
| <a href="#">2314</a> | 620.78   | 1239.55  | 1239.55  | 0.57  | 0    | 69    | 4.8e-007 | 1    | R.QDNSYSVNSAR.Y                                      |

304. [PRDX2\\_HUMAN](#) Mass: 22049 Score: 68 Queries matched: 2 emPAI: 0.38

Peroxiredoxin-2 OS=Homo sapiens GN=PRDX2 PE=1 SV=5

| Query                | Observed | Mr(expt) | Mr(calc) | ppm   | Miss | Score | Expect   | Rank | Peptide         |
|----------------------|----------|----------|----------|-------|------|-------|----------|------|-----------------|
| <a href="#">611</a>  | 462.72   | 923.43   | 923.43   | -7.66 | 0    | 39    | 0.00062  | 1    | K.TDEGIAYR.G    |
| <a href="#">2151</a> | 606.34   | 1210.67  | 1210.67  | 2.80  | 0    | 49    | 7.6e-005 | 1    | R.QITVNDLPVGR.S |

305. [AL9A1\\_HUMAN](#) Mass: 54679 Score: 67 Queries matched: 2 emPAI: 0.07

4-trimethylaminobutyraldehyde dehydrogenase OS=Homo sapiens GN=ALDH9A1 PE=1 SV=3

| Query                | Observed | Mr(expt) | Mr(calc) | ppm   | Miss | Score | Expect   | Rank | Peptide                              |
|----------------------|----------|----------|----------|-------|------|-------|----------|------|--------------------------------------|
| <a href="#">1546</a> | 552.26   | 1102.51  | 1102.51  | -0.08 | 0    | 50    | 5.2e-005 | 1    | R.VEPADASGTEK.A <a href="#">1547</a> |

306. [CK052\\_HUMAN](#) Mass: 14140 Score: 66 Queries matched: 2 emPAI: 0.28

Uncharacterized protein C11orf52 OS=Homo sapiens GN=C11orf52 PE=2 SV=2

| Query                | Observed | Mr(expt) | Mr(calc) | ppm  | Miss | Score | Expect | Rank | Peptide                            |
|----------------------|----------|----------|----------|------|------|-------|--------|------|------------------------------------|
| <a href="#">1968</a> | 586.80   | 1171.60  | 1171.59  | 0.76 | 0    | 53    | 4e-005 | 1    | R.VLQQGSQER.S <a href="#">1967</a> |

307. [NCALD\\_HUMAN](#) Mass: 22345 Score: 65 Queries matched: 1 emPAI: 0.17

Neurocalcin-delta OS=Homo sapiens GN=NCALD PE=2 SV=2

| Query                | Observed | Mr(expt) | Mr(calc) | ppm   | Miss | Score | Expect   | Rank | Peptide          |
|----------------------|----------|----------|----------|-------|------|-------|----------|------|------------------|
| <a href="#">2734</a> | 661.80   | 1321.59  | 1321.60  | -1.75 | 0    | 65    | 1.3e-006 | 1    | R.LLQCDPSSAGQF.- |

|                                                                                                   |                             |              |                    |                    |             |             |                                                                                                           |
|---------------------------------------------------------------------------------------------------|-----------------------------|--------------|--------------------|--------------------|-------------|-------------|-----------------------------------------------------------------------------------------------------------|
| 308.                                                                                              | <a href="#">MEGF9_HUMAN</a> | Mass: 65338  | Score: 64          | Queries matched: 1 | emPAI: 0.06 |             |                                                                                                           |
| Multiple epidermal growth factor-like domains protein 9 OS=Homo sapiens GN=MEGF9 PE=2 SV=3        |                             |              |                    |                    |             |             |                                                                                                           |
| Query                                                                                             | Observed                    | Mr(expt)     | Mr(calc)           | ppm                | Miss Score  | Expect Rank | Peptide                                                                                                   |
| <a href="#">3770</a>                                                                              | 807.85                      | 1613.69      | 1613.68            | 1.06               | 0 64        | 4.7e-007 1  | R.CPCSAVTSTGSCSIK.S                                                                                       |
| 309.                                                                                              | <a href="#">COL12_HUMAN</a> | Mass: 82035  | Score: 64          | Queries matched: 7 | emPAI: 0.05 |             |                                                                                                           |
| Collectin-12 OS=Homo sapiens GN=COLEC12 PE=1 SV=3                                                 |                             |              |                    |                    |             |             |                                                                                                           |
| Query                                                                                             | Observed                    | Mr(expt)     | Mr(calc)           | ppm                | Miss Score  | Expect Rank | Peptide                                                                                                   |
| <a href="#">50</a>                                                                                | 406.18                      | 810.35       | 810.36             | -8.36              | 0 6         | 0.77 3      | K.LFCEDK.S <a href="#">48</a> <a href="#">49</a> <a href="#">51</a> <a href="#">52</a> <a href="#">53</a> |
| <a href="#">2191</a>                                                                              | 610.30                      | 1218.59      | 1218.58            | 3.54               | 0 64        | 2.5e-006 1  | R.SVDDTSQAIQR.I                                                                                           |
| 310.                                                                                              | <a href="#">T106B_HUMAN</a> | Mass: 31393  | Score: 63          | Queries matched: 1 | emPAI: 0.12 |             |                                                                                                           |
| Transmembrane protein 106B OS=Homo sapiens GN=TMEM106B PE=1 SV=2                                  |                             |              |                    |                    |             |             |                                                                                                           |
| Query                                                                                             | Observed                    | Mr(expt)     | Mr(calc)           | ppm                | Miss Score  | Expect Rank | Peptide                                                                                                   |
| <a href="#">3188</a>                                                                              | 719.81                      | 1437.60      | 1437.60            | 5.04               | 0 63        | 8.8e-007 1  | R.DSVTCPTCQGTGR.I                                                                                         |
| 311.                                                                                              | <a href="#">GSH1_HUMAN</a>  | Mass: 73518  | Score: 63          | Queries matched: 3 | emPAI: 0.05 |             |                                                                                                           |
| Glutamate--cysteine ligase catalytic subunit OS=Homo sapiens GN=GCLC PE=1 SV=2                    |                             |              |                    |                    |             |             |                                                                                                           |
| Query                                                                                             | Observed                    | Mr(expt)     | Mr(calc)           | ppm                | Miss Score  | Expect Rank | Peptide                                                                                                   |
| <a href="#">1149</a>                                                                              | 517.24                      | 1032.47      | 1032.47            | 0.76               | 0 40        | 0.00043 1   | K.GGNAVVDGCGK.A <a href="#">1148</a> <a href="#">1150</a>                                                 |
| 312.                                                                                              | <a href="#">ENOG_HUMAN</a>  | Score: 63    | Queries matched: 1 |                    |             |             |                                                                                                           |
| Gamma-enolase OS=Homo sapiens GN=ENO2 PE=1 SV=3                                                   |                             |              |                    |                    |             |             |                                                                                                           |
| Query                                                                                             | Observed                    | Mr(expt)     | Mr(calc)           | ppm                | Miss Score  | Expect Rank | Peptide                                                                                                   |
| <a href="#">3091</a>                                                                              | 703.86                      | 1405.71      | 1405.71            | 1.25               | 0 63        | 4.7e-006 2  | R.GNPVTEVDLYTAK.G                                                                                         |
| 313.                                                                                              | <a href="#">AL1A3_HUMAN</a> | Mass: 56871  | Score: 61          | Queries matched: 4 | emPAI: 0.14 |             |                                                                                                           |
| Aldehyde dehydrogenase family 1 member A3 OS=Homo sapiens GN=ALDH1A3 PE=1 SV=2                    |                             |              |                    |                    |             |             |                                                                                                           |
| Query                                                                                             | Observed                    | Mr(expt)     | Mr(calc)           | ppm                | Miss Score  | Expect Rank | Peptide                                                                                                   |
| <a href="#">850</a>                                                                               | 488.27                      | 974.52       | 974.51             | 8.12               | 1 4         | 3.9 6       | K.EAASRSNLK.R                                                                                             |
| <a href="#">1299</a>                                                                              | 527.24                      | 1052.47      | 1052.47            | -4.07              | 0 36        | 0.00087 1   | K.FATCNPSTR.E <a href="#">1298</a>                                                                        |
| <a href="#">1780</a>                                                                              | 572.29                      | 1142.56      | 1142.56            | -0.13              | 0 44        | 0.00024 1   | K.TEQGPQIDQK.Q                                                                                            |
| 314.                                                                                              | <a href="#">SUCB2_HUMAN</a> | Mass: 46824  | Score: 61          | Queries matched: 3 | emPAI: 0.08 |             |                                                                                                           |
| Succinyl-CoA ligase [GDP-forming] subunit beta, mitochondrial OS=Homo sapiens GN=SUCLG2 PE=1 SV=2 |                             |              |                    |                    |             |             |                                                                                                           |
| Query                                                                                             | Observed                    | Mr(expt)     | Mr(calc)           | ppm                | Miss Score  | Expect Rank | Peptide                                                                                                   |
| <a href="#">1251</a>                                                                              | 523.77                      | 1045.52      | 1045.52            | -1.57              | 0 38        | 0.0017 1    | -.MASPVAAQAGK.L <a href="#">1249</a> <a href="#">1250</a>                                                 |
| 315.                                                                                              | <a href="#">AT1A4_HUMAN</a> | Mass: 115119 | Score: 60          | Queries matched: 3 | emPAI: 0.03 |             |                                                                                                           |
| Sodium/potassium-transporting ATPase subunit alpha-4 OS=Homo sapiens GN=ATP1A4 PE=1 SV=3          |                             |              |                    |                    |             |             |                                                                                                           |
| Query                                                                                             | Observed                    | Mr(expt)     | Mr(calc)           | ppm                | Miss Score  | Expect Rank | Peptide                                                                                                   |
| <a href="#">1915</a>                                                                              | 582.80                      | 1163.58      | 1163.57            | 8.38               | 0 6         | 1.9 4       | K.GTVAPHDQSPR.R                                                                                           |
| <a href="#">3741</a>                                                                              | 803.37                      | 1604.73      | 1604.73            | 1.42               | 0 55        | 1.3e-005 1  | K.VDNSSLTGESEPPSR.S <a href="#">3742</a>                                                                  |
| 316.                                                                                              | <a href="#">TB10A_HUMAN</a> | Mass: 57595  | Score: 60          | Queries matched: 1 | emPAI: 0.06 |             |                                                                                                           |
| TBCL domain family member 10A OS=Homo sapiens GN=TBCLD10A PE=1 SV=1                               |                             |              |                    |                    |             |             |                                                                                                           |
| Query                                                                                             | Observed                    | Mr(expt)     | Mr(calc)           | ppm                | Miss Score  | Expect Rank | Peptide                                                                                                   |
| <a href="#">2881</a>                                                                              | 677.81                      | 1353.60      | 1353.60            | -1.30              | 0 60        | 3.5e-006 1  | K.ACQGYETIER.L                                                                                            |

|                                                                                                     |                             |              |           |                    |             |             |                                                                                             |
|-----------------------------------------------------------------------------------------------------|-----------------------------|--------------|-----------|--------------------|-------------|-------------|---------------------------------------------------------------------------------------------|
| 317.                                                                                                | <a href="#">LPP1_HUMAN</a>  | Mass: 32535  | Score: 60 | Queries matched: 7 | emPAI: 0.12 |             |                                                                                             |
| Lipid phosphate phosphohydrolase 1 OS=Homo sapiens GN=PPAP2A PE=1 SV=1                              |                             |              |           |                    |             |             |                                                                                             |
| Query                                                                                               | Observed                    | Mr(expt)     | Mr(calc)  | ppm                | Miss Score  | Expect Rank | Peptide                                                                                     |
| <a href="#">298</a>                                                                                 | 432.22                      | 862.42       | 862.41    | 7.45               | 1 18        | 0.16 1      | R.MKGDWAR.L <a href="#">297</a> <a href="#">299</a> <a href="#">301</a> <a href="#">302</a> |
| <a href="#">361</a>                                                                                 | 440.21                      | 878.41       | 878.41    | 2.40               | 1 (2)       | 4.7 6       | R.MKGDWAR.L                                                                                 |
| <a href="#">1944</a>                                                                                | 584.77                      | 1167.53      | 1167.52   | 5.56               | 0 60        | 5.1e-006 1  | R.GVFCNDESIK.Y                                                                              |
| 318.                                                                                                | <a href="#">LSAMP_HUMAN</a> | Mass: 37883  | Score: 60 | Queries matched: 2 | emPAI: 0.10 |             |                                                                                             |
| Limbic system-associated membrane protein OS=Homo sapiens GN=LSAMP PE=1 SV=2                        |                             |              |           |                    |             |             |                                                                                             |
| Query                                                                                               | Observed                    | Mr(expt)     | Mr(calc)  | ppm                | Miss Score  | Expect Rank | Peptide                                                                                     |
| <a href="#">1490</a>                                                                                | 545.77                      | 1089.53      | 1089.53   | -3.20              | 0 60        | 1e-005 1    | K.AANEVSSADVK.Q                                                                             |
| <a href="#">2932</a>                                                                                | 681.86                      | 1361.70      | 1361.69   | 9.71               | 1 0         | 7.1 8       | K.SNEATTGRQASLK.C                                                                           |
| 319.                                                                                                | <a href="#">ENPP3_HUMAN</a> | Mass: 101998 | Score: 59 | Queries matched: 4 | emPAI: 0.07 |             |                                                                                             |
| Ectonucleotide pyrophosphatase/phosphodiesterase family member 3 OS=Homo sapiens GN=ENPP3 PE=1 SV=2 |                             |              |           |                    |             |             |                                                                                             |
| Query                                                                                               | Observed                    | Mr(expt)     | Mr(calc)  | ppm                | Miss Score  | Expect Rank | Peptide                                                                                     |
| <a href="#">340</a>                                                                                 | 436.23                      | 870.45       | 870.44    | 1.95               | 0 26        | 0.012 1     | R.VPPSESQK.C <a href="#">339</a> <a href="#">341</a>                                        |
| <a href="#">645</a>                                                                                 | 466.17                      | 930.32       | 930.32    | -2.57              | 0 42        | 5.7e-005 1  | K.DCCADYK.S                                                                                 |
| 320.                                                                                                | <a href="#">LAMP2_HUMAN</a> | Mass: 45503  | Score: 59 | Queries matched: 1 | emPAI: 0.08 |             |                                                                                             |
| Lysosome-associated membrane glycoprotein 2 OS=Homo sapiens GN=LAMP2 PE=1 SV=2                      |                             |              |           |                    |             |             |                                                                                             |
| Query                                                                                               | Observed                    | Mr(expt)     | Mr(calc)  | ppm                | Miss Score  | Expect Rank | Peptide                                                                                     |
| <a href="#">916</a>                                                                                 | 494.29                      | 986.56       | 986.55    | 2.54               | 0 59        | 1.4e-005 1  | R.IPLNDLFR.C                                                                                |
| 321.                                                                                                | <a href="#">PRDX5_HUMAN</a> | Mass: 22301  | Score: 58 | Queries matched: 1 | emPAI: 0.17 |             |                                                                                             |
| Peroxiredoxin-5, mitochondrial OS=Homo sapiens GN=PRDX5 PE=1 SV=4                                   |                             |              |           |                    |             |             |                                                                                             |
| Query                                                                                               | Observed                    | Mr(expt)     | Mr(calc)  | ppm                | Miss Score  | Expect Rank | Peptide                                                                                     |
| <a href="#">2208</a>                                                                                | 611.83                      | 1221.64      | 1221.64   | -2.37              | 0 58        | 1.1e-005 1  | R.FSMVVQDGIK.A                                                                              |
| 322.                                                                                                | <a href="#">IQGA2_HUMAN</a> | Mass: 181036 | Score: 57 | Queries matched: 2 | emPAI: 0.02 |             |                                                                                             |
| Ras GTPase-activating-like protein IQGAP2 OS=Homo sapiens GN=IQGAP2 PE=1 SV=4                       |                             |              |           |                    |             |             |                                                                                             |
| Query                                                                                               | Observed                    | Mr(expt)     | Mr(calc)  | ppm                | Miss Score  | Expect Rank | Peptide                                                                                     |
| <a href="#">2639</a>                                                                                | 651.29                      | 1300.56      | 1300.56   | -0.45              | 0 40        | 0.0002 1    | K.EACNVPEPEEK.F <a href="#">2638</a>                                                        |
| 323.                                                                                                | <a href="#">ACLY_HUMAN</a>  | Mass: 121674 | Score: 57 | Queries matched: 3 | emPAI: 0.03 |             |                                                                                             |
| ATP-citrate synthase OS=Homo sapiens GN=ACLY PE=1 SV=3                                              |                             |              |           |                    |             |             |                                                                                             |
| Query                                                                                               | Observed                    | Mr(expt)     | Mr(calc)  | ppm                | Miss Score  | Expect Rank | Peptide                                                                                     |
| <a href="#">492</a>                                                                                 | 451.75                      | 901.49       | 901.49    | 3.20               | 0 57        | 3.4e-005 1  | R.LGQEATVGK.A <a href="#">487</a> <a href="#">491</a>                                       |
| 324.                                                                                                | <a href="#">DESP_HUMAN</a>  | Mass: 334021 | Score: 57 | Queries matched: 6 | emPAI: 0.01 |             |                                                                                             |
| Desmoplakin OS=Homo sapiens GN=DSP PE=1 SV=3                                                        |                             |              |           |                    |             |             |                                                                                             |
| Query                                                                                               | Observed                    | Mr(expt)     | Mr(calc)  | ppm                | Miss Score  | Expect Rank | Peptide                                                                                     |
| <a href="#">354</a>                                                                                 | 438.23                      | 874.44       | 874.44    | -0.31              | 0 7         | 1.9 6       | K.QSLEEAAT.T                                                                                |
| <a href="#">1294</a>                                                                                | 527.24                      | 1052.46      | 1052.46   | 3.37               | 1 3         | 1.8 2       | K.RTASEDSCK.R                                                                               |
| <a href="#">1576</a>                                                                                | 554.27                      | 1106.53      | 1106.54   | -1.53              | 1 8         | 1.3 3       | K.AEFQEEAKR.R <a href="#">1575</a> <a href="#">1578</a>                                     |
| <a href="#">2197</a>                                                                                | 610.79                      | 1219.57      | 1219.57   | 3.14               | 0 57        | 1.4e-005 1  | R.ETQSQLETER.S                                                                              |
| 325.                                                                                                | <a href="#">SPIT3_HUMAN</a> | Mass: 10644  | Score: 57 | Queries matched: 2 | emPAI: 0.38 |             |                                                                                             |
| Kunitz-type protease inhibitor 3 OS=Homo sapiens GN=SPINT3 PE=2 SV=3                                |                             |              |           |                    |             |             |                                                                                             |
| Query                                                                                               | Observed                    | Mr(expt)     | Mr(calc)  | ppm                | Miss Score  | Expect Rank | Peptide                                                                                     |
| <a href="#">1680</a>                                                                                | 565.24                      | 1128.47      | 1128.47   | 0.53               | 0 45        | 5.4e-005 1  | K.GPCQTYMTR.W <a href="#">1681</a>                                                          |

|                                                                                       |                             |              |           |                     |              |             |                                                                                                                                                                                                             |
|---------------------------------------------------------------------------------------|-----------------------------|--------------|-----------|---------------------|--------------|-------------|-------------------------------------------------------------------------------------------------------------------------------------------------------------------------------------------------------------|
| 326.                                                                                  | <a href="#">WDRI_HUMAN</a>  | Mass: 66836  | Score: 56 | Queries matched: 4  | empPAI: 0.06 |             |                                                                                                                                                                                                             |
| WD repeat-containing protein 1 OS=Homo sapiens GN=WDRI PE=1 SV=4                      |                             |              |           |                     |              |             |                                                                                                                                                                                                             |
| Query                                                                                 | Observed                    | Mr(expt)     | Mr(calc)  | ppm                 | Miss Score   | Expect Rank | Peptide                                                                                                                                                                                                     |
| <a href="#">740</a>                                                                   | 476.74                      | 951.46       | 951.47    | -1.93               | 0 33         | 0.0035 1    | R.DYSGQGVVK.L <a href="#">739</a> <a href="#">741</a> <a href="#">742</a>                                                                                                                                   |
| 327.                                                                                  | <a href="#">COPT1_HUMAN</a> | Mass: 21190  | Score: 55 | Queries matched: 1  | empPAI: 0.18 |             |                                                                                                                                                                                                             |
| High affinity copper uptake protein 1 OS=Homo sapiens GN=SLC31A1 PE=1 SV=1            |                             |              |           |                     |              |             |                                                                                                                                                                                                             |
| Query                                                                                 | Observed                    | Mr(expt)     | Mr(calc)  | ppm                 | Miss Score   | Expect Rank | Peptide                                                                                                                                                                                                     |
| <a href="#">96</a>                                                                    | 409.25                      | 816.48       | 816.48    | 0.44                | 1 55         | 1.8e-005 1  | R.KSQVSIR.Y                                                                                                                                                                                                 |
| 328.                                                                                  | <a href="#">ANXA6_HUMAN</a> | Mass: 76168  | Score: 54 | Queries matched: 10 | empPAI: 0.05 |             |                                                                                                                                                                                                             |
| Annexin A6 OS=Homo sapiens GN=ANXA6 PE=1 SV=3                                         |                             |              |           |                     |              |             |                                                                                                                                                                                                             |
| Query                                                                                 | Observed                    | Mr(expt)     | Mr(calc)  | ppm                 | Miss Score   | Expect Rank | Peptide                                                                                                                                                                                                     |
| <a href="#">1033</a>                                                                  | 504.72                      | 1007.42      | 1007.42   | 1.69                | 0 54         | 1.6e-005 1  | K.AMEGAGTDEK.A <a href="#">1024</a> <a href="#">1025</a> <a href="#">1026</a> <a href="#">1027</a> <a href="#">1028</a> <a href="#">1029</a> <a href="#">1030</a> <a href="#">1031</a> <a href="#">1032</a> |
| 329.                                                                                  | <a href="#">ANO6_HUMAN</a>  | Mass: 107180 | Score: 54 | Queries matched: 3  | empPAI: 0.03 |             |                                                                                                                                                                                                             |
| Anoctamin-6 OS=Homo sapiens GN=ANO6 PE=1 SV=2                                         |                             |              |           |                     |              |             |                                                                                                                                                                                                             |
| Query                                                                                 | Observed                    | Mr(expt)     | Mr(calc)  | ppm                 | Miss Score   | Expect Rank | Peptide                                                                                                                                                                                                     |
| <a href="#">1049</a>                                                                  | 505.80                      | 1009.59      | 1009.60   | -1.81               | 0 0          | 2.2 3       | R.IVYFILSR.V                                                                                                                                                                                                |
| <a href="#">2708</a>                                                                  | 659.77                      | 1317.52      | 1317.53   | -2.81               | 0 48         | 1.7e-005 1  | R.QSEDPSPNER.Y <a href="#">2709</a>                                                                                                                                                                         |
| 330.                                                                                  | <a href="#">I5P1_HUMAN</a>  | Mass: 48359  | Score: 54 | Queries matched: 3  | empPAI: 0.08 |             |                                                                                                                                                                                                             |
| Type I inositol 1,4,5-trisphosphate 5-phosphatase OS=Homo sapiens GN=INPP5A PE=2 SV=1 |                             |              |           |                     |              |             |                                                                                                                                                                                                             |
| Query                                                                                 | Observed                    | Mr(expt)     | Mr(calc)  | ppm                 | Miss Score   | Expect Rank | Peptide                                                                                                                                                                                                     |
| <a href="#">717</a>                                                                   | 473.75                      | 945.48       | 945.48    | 0.01                | 0 52         | 7.2e-005 1  | R.AADTNEVVK.L <a href="#">718</a>                                                                                                                                                                           |
| <a href="#">942</a>                                                                   | 497.27                      | 992.53       | 992.53    | 0.81                | 1 2          | 4.4 10      | K.ELSVFKDR.L                                                                                                                                                                                                |
| 331.                                                                                  | <a href="#">GMPR1_HUMAN</a> | Mass: 37851  | Score: 54 | Queries matched: 1  | empPAI: 0.10 |             |                                                                                                                                                                                                             |
| GMP reductase 1 OS=Homo sapiens GN=GMPR PE=1 SV=1                                     |                             |              |           |                     |              |             |                                                                                                                                                                                                             |
| Query                                                                                 | Observed                    | Mr(expt)     | Mr(calc)  | ppm                 | Miss Score   | Expect Rank | Peptide                                                                                                                                                                                                     |
| <a href="#">2038</a>                                                                  | 595.30                      | 1188.58      | 1188.59   | -7.51               | 0 54         | 3.6e-005 1  | K.VGVGPGSVCTTR.T                                                                                                                                                                                            |
| 332.                                                                                  | <a href="#">LEA3_HUMAN</a>  | Mass: 28756  | Score: 54 | Queries matched: 6  | empPAI: 0.13 |             |                                                                                                                                                                                                             |
| Lymphocyte function-associated antigen 3 OS=Homo sapiens GN=CD58 PE=1 SV=1            |                             |              |           |                     |              |             |                                                                                                                                                                                                             |
| Query                                                                                 | Observed                    | Mr(expt)     | Mr(calc)  | ppm                 | Miss Score   | Expect Rank | Peptide                                                                                                                                                                                                     |
| <a href="#">838</a>                                                                   | 487.73                      | 973.45       | 973.45    | -0.15               | 0 37         | 0.00098 1   | K.MENDLPQK.I <a href="#">837</a> <a href="#">839</a> <a href="#">840</a> <a href="#">841</a> <a href="#">842</a>                                                                                            |
| 333.                                                                                  | <a href="#">ISK2_HUMAN</a>  | Mass: 9627   | Score: 53 | Queries matched: 1  | empPAI: 0.42 |             |                                                                                                                                                                                                             |
| Serine protease inhibitor Kazal-type 2 OS=Homo sapiens GN=SPINK2 PE=1 SV=2            |                             |              |           |                     |              |             |                                                                                                                                                                                                             |
| Query                                                                                 | Observed                    | Mr(expt)     | Mr(calc)  | ppm                 | Miss Score   | Expect Rank | Peptide                                                                                                                                                                                                     |
| <a href="#">1106</a>                                                                  | 513.23                      | 1024.44      | 1024.44   | 0.29                | 0 53         | 1.5e-005 1  | R.TPNCQYR.L                                                                                                                                                                                                 |
| 334.                                                                                  | <a href="#">AQP5_HUMAN</a>  | Mass: 28445  | Score: 53 | Queries matched: 1  | empPAI: 0.13 |             |                                                                                                                                                                                                             |
| Aquaporin-5 OS=Homo sapiens GN=AQP5 PE=1 SV=1                                         |                             |              |           |                     |              |             |                                                                                                                                                                                                             |
| Query                                                                                 | Observed                    | Mr(expt)     | Mr(calc)  | ppm                 | Miss Score   | Expect Rank | Peptide                                                                                                                                                                                                     |
| <a href="#">1422</a>                                                                  | 539.28                      | 1076.54      | 1076.54   | 0.88                | 0 53         | 4.4e-005 1  | R.SFGPAVVMNR.F                                                                                                                                                                                              |
| 335.                                                                                  | <a href="#">QSHB_HUMAN</a>  | Mass: 52523  | Score: 53 | Queries matched: 1  | empPAI: 0.07 |             |                                                                                                                                                                                                             |

Glutathione synthetase OS=Homo sapiens GN=GSS PE=1 SV=1

| Query                | Observed | Mr(expt) | Mr(calc) | ppm   | Miss | Score | Expect   | Rank | Peptide           |
|----------------------|----------|----------|----------|-------|------|-------|----------|------|-------------------|
| <a href="#">3086</a> | 701.87   | 1401.72  | 1401.73  | -4.34 | 1    | 53    | 5.4e-005 | 1    | K.CPDIATQLAGTKK.V |

336. [MAL2\\_HUMAN](#) Mass: 19341 Score: 51 Queries matched: 1 emPAI: 0.20

Protein MAL2 OS=Homo sapiens GN=MAL2 PE=1 SV=1

| Query                | Observed | Mr(expt) | Mr(calc) | ppm  | Miss | Score | Expect   | Rank | Peptide         |
|----------------------|----------|----------|----------|------|------|-------|----------|------|-----------------|
| <a href="#">1842</a> | 576.34   | 1150.67  | 1150.67  | 0.31 | 0    | 51    | 1.6e-005 | 1    | R.VTLPAGPDILR.T |

337. [SC5A1\\_HUMAN](#) Mass: 74305 Score: 51 Queries matched: 2 emPAI: 0.05

Sodium/glucose cotransporter 1 OS=Homo sapiens GN=SLC5A1 PE=1 SV=1

| Query                | Observed | Mr(expt) | Mr(calc) | ppm  | Miss | Score | Expect | Rank | Peptide                              |
|----------------------|----------|----------|----------|------|------|-------|--------|------|--------------------------------------|
| <a href="#">2587</a> | 646.31   | 1290.60  | 1290.59  | 5.12 | 0    | 38    | 0.001  | 1    | K.IACVVPSECEK.Y <a href="#">2586</a> |

338. [NEFH\\_HUMAN](#) Mass: 112639 Score: 51 Queries matched: 2 emPAI: 0.03

Neurofilament heavy polypeptide OS=Homo sapiens GN=NEFH PE=1 SV=4

| Query                | Observed | Mr(expt) | Mr(calc) | ppm   | Miss | Score | Expect   | Rank | Peptide          |
|----------------------|----------|----------|----------|-------|------|-------|----------|------|------------------|
| <a href="#">109</a>  | 411.69   | 821.37   | 821.37   | 3.35  | 0    | 5     | 1.9      | 10   | K.VNTDAMR.S      |
| <a href="#">1915</a> | 582.80   | 1163.58  | 1163.58  | -0.11 | 0    | 51    | 6.6e-005 | 1    | R.TSVSSVSASPSR.F |

339. [MP2K2\\_HUMAN](#) Mass: 44681 Score: 51 Queries matched: 2 emPAI: 0.08

Dual specificity mitogen-activated protein kinase kinase 2 OS=Homo sapiens GN=MAP2K2 PE=1 SV=1

| Query               | Observed | Mr(expt) | Mr(calc) | ppm   | Miss | Score | Expect  | Rank | Peptide                          |
|---------------------|----------|----------|----------|-------|------|-------|---------|------|----------------------------------|
| <a href="#">892</a> | 492.27   | 982.52   | 982.52   | -1.46 | 0    | 41    | 0.00074 | 1    | R.LNQPPTTR.T <a href="#">893</a> |

340. [RAB13\\_HUMAN](#) Score: 51 Queries matched: 6

Ras-related protein Rab-13 OS=Homo sapiens GN=RAB13 PE=1 SV=1

| Query                | Observed | Mr(expt) | Mr(calc) | ppm  | Miss | Score | Expect   | Rank | Peptide                                                                                      |
|----------------------|----------|----------|----------|------|------|-------|----------|------|----------------------------------------------------------------------------------------------|
| <a href="#">430</a>  | 445.25   | 888.49   | 888.49   | 0.32 | 1    | 8     | 1.4      | 6    | R.TVDIEGKK.I <a href="#">425</a> <a href="#">426</a> <a href="#">427</a> <a href="#">428</a> |
| <a href="#">1398</a> | 536.33   | 1070.64  | 1070.63  | 3.27 | 0    | 51    | 4.5e-005 | 1    | K.LLLIGDSGVGK.T                                                                              |

341. [2AAA\\_HUMAN](#) Mass: 66065 Score: 51 Queries matched: 1 emPAI: 0.06

Serine/threonine-protein phosphatase 2A 65 kDa regulatory subunit A alpha isoform OS=Homo sapiens GN=PPP2R1A PE=1 SV=4

| Query                | Observed | Mr(expt) | Mr(calc) | ppm  | Miss | Score | Expect   | Rank | Peptide      |
|----------------------|----------|----------|----------|------|------|-------|----------|------|--------------|
| <a href="#">1893</a> | 580.80   | 1159.58  | 1159.57  | 4.23 | 0    | 51    | 8.3e-005 | 1    | K.LTQDQDVK.Y |

342. [TBA1A\\_HUMAN](#) Mass: 50788 Score: 50 Queries matched: 1 emPAI: 0.07

Tubulin alpha-1A chain OS=Homo sapiens GN=TUBA1A PE=1 SV=1

| Query                | Observed | Mr(expt) | Mr(calc) | ppm  | Miss | Score | Expect   | Rank | Peptide        |
|----------------------|----------|----------|----------|------|------|-------|----------|------|----------------|
| <a href="#">1072</a> | 508.29   | 1014.57  | 1014.57  | 0.14 | 0    | 50    | 7.3e-005 | 1    | K.DVNAAIATIK.T |

## Proteins matching the same set of peptides:

[TBA1B\\_HUMAN](#) Mass: 50804 Score: 50 Queries matched: 1

Tubulin alpha-1B chain OS=Homo sapiens GN=TUBA1B PE=1 SV=1

[TBA1C\\_HUMAN](#) Mass: 50548 Score: 50 Queries matched: 1

Tubulin alpha-1C chain OS=Homo sapiens GN=TUBA1C PE=1 SV=1

[TBA3C\\_HUMAN](#) Mass: 50612 Score: 50 Queries matched: 1

Tubulin alpha-3C/D chain OS=Homo sapiens GN=TUBA3C PE=1 SV=3

[TBA3E\\_HUMAN](#) Mass: 50568 Score: 50 Queries matched: 1

Tubulin alpha-3E chain OS=Homo sapiens GN=TUBA3E PE=1 SV=2

343. [ZN263\\_HUMAN](#) Score: 50 Queries matched: 6



Zinc finger protein 263 OS=Homo sapiens GN=ZNF263 PE=2 SV=2

| Query               | Observed | Mr(expt) | Mr(calc) | ppm   | Miss | Score | Expect | Rank | Peptide                                                                                       |
|---------------------|----------|----------|----------|-------|------|-------|--------|------|-----------------------------------------------------------------------------------------------|
| <a href="#">287</a> | 429.72   | 857.42   | 857.42   | 5.04  | 0    | 0     | 4.7    | 3    | R.QGMHLTR.H                                                                                   |
| <a href="#">415</a> | 444.71   | 887.41   | 887.41   | -0.82 | 0    | 27    | 0.006  | 2    | M.ASGPGSQER.E <a href="#">416</a> <a href="#">417</a> <a href="#">418</a> <a href="#">419</a> |

344. [CHMP5\\_HUMAN](#) Mass: 24612 Score: 50 Queries matched: 2 emPAI: 0.15

Charged multivesicular body protein 5 OS=Homo sapiens GN=CHMP5 PE=1 SV=1

| Query                | Observed | Mr(expt) | Mr(calc) | ppm   | Miss | Score | Expect   | Rank | Peptide              |
|----------------------|----------|----------|----------|-------|------|-------|----------|------|----------------------|
| <a href="#">1657</a> | 563.27   | 1124.53  | 1124.54  | -3.18 | 1    | 0     | 4.8      | 4    | K.DTKTTVDAMK.L       |
| <a href="#">3952</a> | 843.42   | 1684.82  | 1684.81  | 7.97  | 0    | 50    | 6.5e-005 | 1    | K.APPPSLTDCIGTVDSR.A |

345. [RINI\\_HUMAN](#) Mass: 51766 Score: 49 Queries matched: 2 emPAI: 0.15

Ribonuclease inhibitor OS=Homo sapiens GN=RNH1 PE=1 SV=2

| Query                | Observed | Mr(expt) | Mr(calc) | ppm   | Miss | Score | Expect   | Rank | Peptide          |
|----------------------|----------|----------|----------|-------|------|-------|----------|------|------------------|
| <a href="#">180</a>  | 419.17   | 836.33   | 836.33   | 0.83  | 0    | 15    | 0.041    | 1    | K.GCGDLCR.V      |
| <a href="#">3058</a> | 699.29   | 1396.57  | 1396.57  | -3.74 | 0    | 48    | 1.7e-005 | 1    | K.LESCGVTSDNCR.D |

346. [SYT7\\_HUMAN](#) Mass: 45815 Score: 49 Queries matched: 1 emPAI: 0.08

Synaptotagmin-7 OS=Homo sapiens GN=SYT7 PE=1 SV=3

| Query                | Observed | Mr(expt) | Mr(calc) | ppm  | Miss | Score | Expect   | Rank | Peptide           |
|----------------------|----------|----------|----------|------|------|-------|----------|------|-------------------|
| <a href="#">2877</a> | 677.32   | 1352.63  | 1352.63  | 1.66 | 0    | 49    | 7.7e-005 | 1    | K.AMDIGGTSDPYVK.V |

347. [EF1A1\\_HUMAN](#) Mass: 50451 Score: 49 Queries matched: 2 emPAI: 0.07

Elongation factor 1-alpha 1 OS=Homo sapiens GN=EEF1A1 PE=1 SV=1

| Query               | Observed | Mr(expt) | Mr(calc) | ppm   | Miss | Score | Expect   | Rank | Peptide       |
|---------------------|----------|----------|----------|-------|------|-------|----------|------|---------------|
| <a href="#">334</a> | 435.77   | 869.53   | 869.53   | -1.22 | 0    | 5     | 0.86     | 4    | K.QLIVGVNK.M  |
| <a href="#">576</a> | 457.79   | 913.57   | 913.56   | 6.60  | 0    | 49    | 6.5e-005 | 1    | R.QTVAVGVIK.A |

Proteins matching the same set of peptides:

[EF1A2\\_HUMAN](#) Mass: 50780 Score: 49 Queries matched: 2

Elongation factor 1-alpha 2 OS=Homo sapiens GN=EEF1A2 PE=1 SV=1

[EF1A3\\_HUMAN](#) Mass: 50495 Score: 49 Queries matched: 2

Putative elongation factor 1-alpha-like 3 OS=Homo sapiens GN=EEF1A1P5 PE=5 SV=1

348. [VAS1\\_HUMAN](#) Mass: 52164 Score: 49 Queries matched: 1 emPAI: 0.07

V-type proton ATPase subunit S1 OS=Homo sapiens GN=ATP6A1 PE=1 SV=2

| Query               | Observed | Mr(expt) | Mr(calc) | ppm  | Miss | Score | Expect   | Rank | Peptide     |
|---------------------|----------|----------|----------|------|------|-------|----------|------|-------------|
| <a href="#">218</a> | 422.28   | 842.54   | 842.53   | 3.28 | 1    | 49    | 3.9e-005 | 1    | K.KGSLVAR.T |

349. [GSTP1\\_HUMAN](#) Mass: 23569 Score: 48 Queries matched: 1 emPAI: 0.16

Glutathione S-transferase P OS=Homo sapiens GN=GSTP1 PE=1 SV=2

| Query                | Observed | Mr(expt) | Mr(calc) | ppm  | Miss | Score | Expect  | Rank | Peptide       |
|----------------------|----------|----------|----------|------|------|-------|---------|------|---------------|
| <a href="#">1747</a> | 568.79   | 1135.57  | 1135.57  | 1.60 | 0    | 48    | 0.00012 | 1    | K.ASCLYQLPK.F |

350. [TLN1\\_HUMAN](#) Mass: 271766 Score: 48 Queries matched: 1 emPAI: 0.01

Talin-1 OS=Homo sapiens GN=TLN1 PE=1 SV=3

| Query                | Observed | Mr(expt) | Mr(calc) | ppm  | Miss | Score | Expect   | Rank | Peptide        |
|----------------------|----------|----------|----------|------|------|-------|----------|------|----------------|
| <a href="#">1061</a> | 507.25   | 1012.49  | 1012.49  | 0.37 | 0    | 48    | 9.6e-005 | 1    | R.SAQPASAEPR.Q |

351. [QOR\\_HUMAN](#) Mass: 35356 Score: 48 Queries matched: 1 emPAI: 0.11

Quinone oxidoreductase OS=Homo sapiens GN=CRYZ PE=1 SV=1

| Query                                                                      | Observed                    | Mr(expt)     | Mr(calc)  | ppm                | Miss        | Score | Expect  | Rank | Peptide                                |
|----------------------------------------------------------------------------|-----------------------------|--------------|-----------|--------------------|-------------|-------|---------|------|----------------------------------------|
| <a href="#">2107</a>                                                       | 602.31                      | 1202.61      | 1202.61   | -1.96              | 0           | 48    | 0.00018 | 1    | K.ILGTAGTEEGQK.I                       |
| <hr/>                                                                      |                             |              |           |                    |             |       |         |      |                                        |
| 352.                                                                       | <a href="#">TCPD_HUMAN</a>  | Mass: 58401  | Score: 48 | Queries matched: 3 | emPAI: 0.06 |       |         |      |                                        |
| T-complex protein 1 subunit delta OS=Homo sapiens GN=CCT4 PE=1 SV=4        |                             |              |           |                    |             |       |         |      |                                        |
| Query                                                                      | Observed                    | Mr(expt)     | Mr(calc)  | ppm                | Miss        | Score | Expect  | Rank | Peptide                                |
| <a href="#">437</a>                                                        | 445.72                      | 889.44       | 889.43    | 2.84               | 0           | 48    | 0.00016 | 1    | K.ITGCASPGK.T                          |
| <a href="#">1324</a>                                                       | 530.77                      | 1059.53      | 1059.54   | -7.74              | 1           | 5     | 3.8     | 4    | R.SGATAGAAGGRGK.G <a href="#">1329</a> |
| <hr/>                                                                      |                             |              |           |                    |             |       |         |      |                                        |
| 353.                                                                       | <a href="#">GPC4_HUMAN</a>  | Mass: 63455  | Score: 47 | Queries matched: 1 | emPAI: 0.06 |       |         |      |                                        |
| Glypican-4 OS=Homo sapiens GN=GPC4 PE=1 SV=4                               |                             |              |           |                    |             |       |         |      |                                        |
| Query                                                                      | Observed                    | Mr(expt)     | Mr(calc)  | ppm                | Miss        | Score | Expect  | Rank | Peptide                                |
| <a href="#">4505</a>                                                       | 972.38                      | 1942.75      | 1942.75   | 0.94               | 0           | 47    | 2e-005  | 1    | K.ICPQGSTCCSQEMEEK.Y                   |
| <hr/>                                                                      |                             |              |           |                    |             |       |         |      |                                        |
| 354.                                                                       | <a href="#">CO4A5_HUMAN</a> | Mass: 162083 | Score: 47 | Queries matched: 3 | emPAI: 0.02 |       |         |      |                                        |
| Collagen alpha-5(IV) chain OS=Homo sapiens GN=COL4A5 PE=1 SV=2             |                             |              |           |                    |             |       |         |      |                                        |
| Query                                                                      | Observed                    | Mr(expt)     | Mr(calc)  | ppm                | Miss        | Score | Expect  | Rank | Peptide                                |
| <a href="#">579</a>                                                        | 458.25                      | 914.48       | 914.48    | -0.46              | 0           | 35    | 0.0023  | 2    | K.GLQGEQGVK.G <a href="#">580</a>      |
| <a href="#">3893</a>                                                       | 829.44                      | 1656.86      | 1656.86   | -3.18              | 0           | 1     | 4.8     | 1    | K.GQPGLPGFPGTPGPPGPK.G                 |
| <hr/>                                                                      |                             |              |           |                    |             |       |         |      |                                        |
| 355.                                                                       | <a href="#">LIN7C_HUMAN</a> | Mass: 21935  | Score: 47 | Queries matched: 2 | emPAI: 0.38 |       |         |      |                                        |
| Protein lin-7 homolog C OS=Homo sapiens GN=LIN7C PE=1 SV=1                 |                             |              |           |                    |             |       |         |      |                                        |
| Query                                                                      | Observed                    | Mr(expt)     | Mr(calc)  | ppm                | Miss        | Score | Expect  | Rank | Peptide                                |
| <a href="#">206</a>                                                        | 421.22                      | 840.43       | 840.43    | -6.26              | 0           | 28    | 0.0052  | 1    | R.SGEVPPQK.L                           |
| <a href="#">940</a>                                                        | 496.74                      | 991.46       | 991.46    | -5.38              | 0           | 38    | 0.0012  | 1    | K.VLEEMESR.F                           |
| <hr/>                                                                      |                             |              |           |                    |             |       |         |      |                                        |
| 356.                                                                       | <a href="#">KGP2_HUMAN</a>  | Mass: 88061  | Score: 46 | Queries matched: 2 | emPAI: 0.04 |       |         |      |                                        |
| cGMP-dependent protein kinase 2 OS=Homo sapiens GN=PRKG2 PE=1 SV=1         |                             |              |           |                    |             |       |         |      |                                        |
| Query                                                                      | Observed                    | Mr(expt)     | Mr(calc)  | ppm                | Miss        | Score | Expect  | Rank | Peptide                                |
| <a href="#">811</a>                                                        | 484.22                      | 966.43       | 966.43    | 2.82               | 0           | 10    | 0.51    | 2    | R.GSFDEPTSK.F                          |
| <a href="#">918</a>                                                        | 494.76                      | 987.50       | 987.50    | 0.17               | 0           | 46    | 0.00022 | 1    | K.AGVSAEPTTR.T                         |
| <hr/>                                                                      |                             |              |           |                    |             |       |         |      |                                        |
| 357.                                                                       | <a href="#">CHM1B_HUMAN</a> | Mass: 22152  | Score: 46 | Queries matched: 1 | emPAI: 0.17 |       |         |      |                                        |
| Charged multivesicular body protein 1b OS=Homo sapiens GN=CHMP1B PE=1 SV=1 |                             |              |           |                    |             |       |         |      |                                        |
| Query                                                                      | Observed                    | Mr(expt)     | Mr(calc)  | ppm                | Miss        | Score | Expect  | Rank | Peptide                                |
| <a href="#">663</a>                                                        | 467.75                      | 933.49       | 933.50    | -2.51              | 0           | 46    | 0.00027 | 1    | R.VQTAVTMGK.V                          |
| <hr/>                                                                      |                             |              |           |                    |             |       |         |      |                                        |
| 358.                                                                       | <a href="#">MB12B_HUMAN</a> | Mass: 35996  | Score: 45 | Queries matched: 1 | emPAI: 0.10 |       |         |      |                                        |
| Multivesicular body subunit 12B OS=Homo sapiens GN=MVB12B PE=1 SV=2        |                             |              |           |                    |             |       |         |      |                                        |
| Query                                                                      | Observed                    | Mr(expt)     | Mr(calc)  | ppm                | Miss        | Score | Expect  | Rank | Peptide                                |
| <a href="#">2360</a>                                                       | 625.79                      | 1249.56      | 1249.56   | -4.08              | 0           | 45    | 0.00012 | 1    | R.DSTEAACDIR.I                         |
| <hr/>                                                                      |                             |              |           |                    |             |       |         |      |                                        |
| 359.                                                                       | <a href="#">SYTL4_HUMAN</a> | Mass: 76603  | Score: 45 | Queries matched: 2 | emPAI: 0.05 |       |         |      |                                        |
| Synaptotagmin-like protein 4 OS=Homo sapiens GN=SYTL4 PE=1 SV=2            |                             |              |           |                    |             |       |         |      |                                        |
| Query                                                                      | Observed                    | Mr(expt)     | Mr(calc)  | ppm                | Miss        | Score | Expect  | Rank | Peptide                                |
| <a href="#">818</a>                                                        | 484.74                      | 967.46       | 967.46    | -1.07              | 0           | 45    | 0.00015 | 1    | K.AGGTSDSFVK.G                         |
| <a href="#">1490</a>                                                       | 545.77                      | 1089.53      | 1089.52   | 5.87               | 0           | 1     | 7.8     | 5    | R.IQESNGTWR.C                          |
| <hr/>                                                                      |                             |              |           |                    |             |       |         |      |                                        |
| 360.                                                                       | <a href="#">SDCB1_HUMAN</a> | Mass: 32595  | Score: 45 | Queries matched: 8 | emPAI: 0.24 |       |         |      |                                        |
| Syntenin-1 OS=Homo sapiens GN=SDCBP PE=1 SV=1                              |                             |              |           |                    |             |       |         |      |                                        |

| Query                                                                         | Observed                    | Mr(expt)     | Mr(calc)           | ppm                | Miss        | Score | Expect  | Rank | Peptide                                                                                 |
|-------------------------------------------------------------------------------|-----------------------------|--------------|--------------------|--------------------|-------------|-------|---------|------|-----------------------------------------------------------------------------------------|
| <a href="#">34</a>                                                            | 405.20                      | 808.38       | 808.38             | -1.94              | 0           | 22    | 0.03    | 1    | R.MAPSIMK.S <a href="#">33</a> <a href="#">35</a> <a href="#">36</a> <a href="#">37</a> |
| <a href="#">100</a>                                                           | 410.21                      | 818.41       | 818.40             | 2.22               | 0           | 19    | 0.14    | 1    | R.DRPFER.T                                                                              |
| <a href="#">1775</a>                                                          | 571.28                      | 1140.55      | 1140.55            | 1.22               | 0           | 20    | 0.063   | 1    | K.SLMDHTIPEV.-                                                                          |
| <a href="#">2654</a>                                                          | 652.82                      | 1303.64      | 1303.64            | -6.88              | 1           | 41    | 0.00062 | 1    | R.EVILCKDQDGK.I                                                                         |
| <hr/>                                                                         |                             |              |                    |                    |             |       |         |      |                                                                                         |
| 361.                                                                          | <a href="#">HID1_HUMAN</a>  | Score: 45    | Queries matched: 2 |                    |             |       |         |      |                                                                                         |
| Protein HID1 OS=Homo sapiens GN=HID1 PE=1 SV=1                                |                             |              |                    |                    |             |       |         |      |                                                                                         |
| Query                                                                         | Observed                    | Mr(expt)     | Mr(calc)           | ppm                | Miss        | Score | Expect  | Rank | Peptide                                                                                 |
| <a href="#">806</a>                                                           | 483.75                      | 965.48       | 965.49             | -3.57              | 0           | 3     | 3.7     | 5    | K.SLSMVTANK.L                                                                           |
| <a href="#">916</a>                                                           | 494.29                      | 986.56       | 986.56             | -0.88              | 0           | 45    | 0.00035 | 2    | K.LPLQTIMR.L                                                                            |
| <hr/>                                                                         |                             |              |                    |                    |             |       |         |      |                                                                                         |
| 362.                                                                          | <a href="#">ZG16B_HUMAN</a> | Mass: 22725  | Score: 44          | Queries matched: 1 | emPAI: 0.17 |       |         |      |                                                                                         |
| Zymogen granule protein 16 homolog B OS=Homo sapiens GN=ZG16B PE=1 SV=3       |                             |              |                    |                    |             |       |         |      |                                                                                         |
| Query                                                                         | Observed                    | Mr(expt)     | Mr(calc)           | ppm                | Miss        | Score | Expect  | Rank | Peptide                                                                                 |
| <a href="#">589</a>                                                           | 460.23                      | 918.45       | 918.44             | 0.44               | 0           | 44    | 0.00026 | 1    | K.LGDSWDVK.L                                                                            |
| <hr/>                                                                         |                             |              |                    |                    |             |       |         |      |                                                                                         |
| 363.                                                                          | <a href="#">NPC2_HUMAN</a>  | Mass: 16902  | Score: 44          | Queries matched: 3 | emPAI: 0.23 |       |         |      |                                                                                         |
| Epididymal secretory protein E1 OS=Homo sapiens GN=NPC2 PE=1 SV=1             |                             |              |                    |                    |             |       |         |      |                                                                                         |
| Query                                                                         | Observed                    | Mr(expt)     | Mr(calc)           | ppm                | Miss        | Score | Expect  | Rank | Peptide                                                                                 |
| <a href="#">1074</a>                                                          | 508.77                      | 1015.52      | 1015.51            | 5.72               | 0           | 14    | 0.29    | 1    | K.SGINCPIQK.D <a href="#">1073</a>                                                      |
| <a href="#">4383</a>                                                          | 922.43                      | 1842.85      | 1842.86            | -4.76              | 0           | 44    | 0.00024 | 1    | K.EVNVSPCPTQPCQLSK.G                                                                    |
| <hr/>                                                                         |                             |              |                    |                    |             |       |         |      |                                                                                         |
| 364.                                                                          | <a href="#">KLK3_HUMAN</a>  | Mass: 29293  | Score: 44          | Queries matched: 2 | emPAI: 0.28 |       |         |      |                                                                                         |
| Prostate-specific antigen OS=Homo sapiens GN=KLK3 PE=1 SV=2                   |                             |              |                    |                    |             |       |         |      |                                                                                         |
| Query                                                                         | Observed                    | Mr(expt)     | Mr(calc)           | ppm                | Miss        | Score | Expect  | Rank | Peptide                                                                                 |
| <a href="#">265</a>                                                           | 427.70                      | 853.40       | 853.39             | 1.61               | 0           | 28    | 0.0061  | 1    | K.FMLCAGR.W                                                                             |
| <a href="#">1421</a>                                                          | 539.26                      | 1076.50      | 1076.50            | 2.94               | 0           | 34    | 0.0022  | 1    | R.IVGGWECEK.H                                                                           |
| <hr/>                                                                         |                             |              |                    |                    |             |       |         |      |                                                                                         |
| 365.                                                                          | <a href="#">CN37_HUMAN</a>  | Mass: 47948  | Score: 43          | Queries matched: 2 | emPAI: 0.08 |       |         |      |                                                                                         |
| 2',3'-cyclic-nucleotide 3'-phosphodiesterase OS=Homo sapiens GN=CNP PE=1 SV=2 |                             |              |                    |                    |             |       |         |      |                                                                                         |
| Query                                                                         | Observed                    | Mr(expt)     | Mr(calc)           | ppm                | Miss        | Score | Expect  | Rank | Peptide                                                                                 |
| <a href="#">385</a>                                                           | 442.71                      | 883.40       | 883.41             | -7.75              | 0           | (0)   | 3.6     | 4    | K.MVSADAYK.I                                                                            |
| <a href="#">476</a>                                                           | 450.71                      | 899.40       | 899.41             | -2.85              | 0           | 43    | 0.00018 | 1    | K.MVSADAYK.I                                                                            |
| <hr/>                                                                         |                             |              |                    |                    |             |       |         |      |                                                                                         |
| 366.                                                                          | <a href="#">CKAP5_HUMAN</a> | Mass: 227062 | Score: 43          | Queries matched: 3 | emPAI: 0.02 |       |         |      |                                                                                         |
| Cytoskeleton-associated protein 5 OS=Homo sapiens GN=CKAP5 PE=1 SV=3          |                             |              |                    |                    |             |       |         |      |                                                                                         |
| Query                                                                         | Observed                    | Mr(expt)     | Mr(calc)           | ppm                | Miss        | Score | Expect  | Rank | Peptide                                                                                 |
| <a href="#">647</a>                                                           | 466.74                      | 931.46       | 931.46             | 0.19               | 0           | 3     | 4.6     | 9    | R.SQQELEAK.L                                                                            |
| <a href="#">1949</a>                                                          | 585.29                      | 1168.57      | 1168.57            | 5.02               | 0           | 43    | 0.00044 | 1    | K.MQGQSPAPTR.G                                                                          |
| <a href="#">4069</a>                                                          | 859.97                      | 1717.92      | 1717.93            | -4.55              | 1           | 5     | 1.4     | 1    | R.DAAFEALGTALKVVGK.A                                                                    |
| <hr/>                                                                         |                             |              |                    |                    |             |       |         |      |                                                                                         |
| 367.                                                                          | <a href="#">FERM2_HUMAN</a> | Mass: 78438  | Score: 43          | Queries matched: 1 | emPAI: 0.05 |       |         |      |                                                                                         |
| Fermitin family homolog 2 OS=Homo sapiens GN=FERMT2 PE=1 SV=1                 |                             |              |                    |                    |             |       |         |      |                                                                                         |
| Query                                                                         | Observed                    | Mr(expt)     | Mr(calc)           | ppm                | Miss        | Score | Expect  | Rank | Peptide                                                                                 |
| <a href="#">3415</a>                                                          | 752.36                      | 1502.70      | 1502.70            | 0.53               | 0           | 43    | 0.0003  | 1    | R.GCEVTPDVNISGQK.F                                                                      |
| <hr/>                                                                         |                             |              |                    |                    |             |       |         |      |                                                                                         |
| 368.                                                                          | <a href="#">SERA_HUMAN</a>  | Mass: 57356  | Score: 42          | Queries matched: 3 | emPAI: 0.13 |       |         |      |                                                                                         |
| D-3-phosphoglycerate dehydrogenase OS=Homo sapiens GN=PHGDH PE=1 SV=4         |                             |              |                    |                    |             |       |         |      |                                                                                         |
| Query                                                                         | Observed                    | Mr(expt)     | Mr(calc)           | ppm                | Miss        | Score | Expect  | Rank | Peptide                                                                                 |
| <a href="#">910</a>                                                           | 493.81                      | 985.60       | 985.60             | 3.72               | 0           | 29    | 0.0053  | 1    | R.DLPLLLFR.T                                                                            |

[1397](#) 536.30 1070.58 1070.57 5.46 0 33 0.0036 1 K.QADVNLVNAK.L  
[1405](#) 537.78 1073.56 1073.55 1.27 0 21 0.11 1 R.QIPQATASMK.D

369. [TALDO\\_HUMAN](#) Mass: 37688 Score: 42 Queries matched: 1 emPAI: 0.10

Transaldolase OS=Homo sapiens GN=TALDO1 PE=1 SV=2

| Query               | Observed | Mr(expt) | Mr(calc) | ppm  | Miss | Score | Expect  | Rank | Peptide       |
|---------------------|----------|----------|----------|------|------|-------|---------|------|---------------|
| <a href="#">647</a> | 466.74   | 931.46   | 931.46   | 0.19 | 0    | 42    | 0.00063 | 1    | K.AAQASDLEK.I |

370. [CTL4\\_HUMAN](#) Mass: 80741 Score: 41 Queries matched: 7 emPAI: 0.05

Choline transporter-like protein 4 OS=Homo sapiens GN=SLC44A4 PE=2 SV=2

| Query                | Observed | Mr(expt) | Mr(calc) | ppm   | Miss | Score | Expect  | Rank | Peptide                                                                                                          |
|----------------------|----------|----------|----------|-------|------|-------|---------|------|------------------------------------------------------------------------------------------------------------------|
| <a href="#">381</a>  | 442.71   | 883.40   | 883.40   | -1.51 | 0    | 17    | 0.08    | 1    | K.NEAPPDNK.K <a href="#">380</a> <a href="#">382</a> <a href="#">383</a> <a href="#">384</a> <a href="#">385</a> |
| <a href="#">3870</a> | 824.90   | 1647.78  | 1647.78  | 4.07  | 0    | 41    | 0.00054 | 1    | K.NEFSQTVGEVFTK.N                                                                                                |

371. [ANXA5\\_HUMAN](#) Mass: 35971 Score: 41 Queries matched: 1 emPAI: 0.10

Annexin A5 OS=Homo sapiens GN=ANXA5 PE=1 SV=2

| Query                | Observed | Mr(expt) | Mr(calc) | ppm  | Miss | Score | Expect  | Rank | Peptide          |
|----------------------|----------|----------|----------|------|------|-------|---------|------|------------------|
| <a href="#">2812</a> | 670.81   | 1339.61  | 1339.60  | 1.63 | 0    | 41    | 0.00041 | 1    | R.GTVTDFPGFDER.A |

372. [GTR3\\_HUMAN](#) Mass: 54345 Score: 41 Queries matched: 1 emPAI: 0.07

Solute carrier family 2, facilitated glucose transporter member 3 OS=Homo sapiens GN=SLC2A3 PE=1 SV=1

| Query                | Observed | Mr(expt) | Mr(calc) | ppm  | Miss | Score | Expect  | Rank | Peptide       |
|----------------------|----------|----------|----------|------|------|-------|---------|------|---------------|
| <a href="#">1560</a> | 552.83   | 1103.64  | 1103.63  | 1.65 | 0    | 41    | 0.00038 | 1    | K.QVTVLELFR.V |

Proteins matching the same set of peptides:

[GTR14\\_HUMAN](#) Mass: 56854 Score: 41 Queries matched: 1

Solute carrier family 2, facilitated glucose transporter member 14 OS=Homo sapiens GN=SLC2A14 PE=2 SV=1

373. [LANC1\\_HUMAN](#) Mass: 45995 Score: 41 Queries matched: 2 emPAI: 0.08

LanC-like protein 1 OS=Homo sapiens GN=LANCL1 PE=1 SV=1

| Query               | Observed | Mr(expt) | Mr(calc) | ppm   | Miss | Score | Expect  | Rank | Peptide                          |
|---------------------|----------|----------|----------|-------|------|-------|---------|------|----------------------------------|
| <a href="#">938</a> | 496.73   | 991.44   | 991.44   | -1.33 | 0    | 41    | 0.00034 | 1    | K.QAEDCITR.L <a href="#">939</a> |

374. [CHM2B\\_HUMAN](#) Mass: 23948 Score: 41 Queries matched: 1 emPAI: 0.16

Charged multivesicular body protein 2b OS=Homo sapiens GN=CHMP2B PE=1 SV=1

| Query               | Observed | Mr(expt) | Mr(calc) | ppm   | Miss | Score | Expect  | Rank | Peptide       |
|---------------------|----------|----------|----------|-------|------|-------|---------|------|---------------|
| <a href="#">887</a> | 491.75   | 981.48   | 981.48   | -2.26 | 0    | 41    | 0.00057 | 1    | K.VTSMSTQTK.V |

375. [DB126\\_HUMAN](#) Mass: 12565 Score: 40 Queries matched: 2 emPAI: 0.32

Beta-defensin 126 OS=Homo sapiens GN=DEFB126 PE=2 SV=2

| Query               | Observed | Mr(expt) | Mr(calc) | ppm  | Miss | Score | Expect | Rank | Peptide                          |
|---------------------|----------|----------|----------|------|------|-------|--------|------|----------------------------------|
| <a href="#">937</a> | 496.70   | 991.39   | 991.39   | 1.98 | 0    | 28    | 0.0016 | 1    | R.DCCVPADR.R <a href="#">936</a> |

376. [LEG3\\_HUMAN](#) Mass: 26193 Score: 40 Queries matched: 9 emPAI: 0.15

Galectin-3 OS=Homo sapiens GN=LGALS3 PE=1 SV=5

| Query               | Observed | Mr(expt) | Mr(calc) | ppm   | Miss | Score | Expect | Rank | Peptide                                                                                                                                                                     |
|---------------------|----------|----------|----------|-------|------|-------|--------|------|-----------------------------------------------------------------------------------------------------------------------------------------------------------------------------|
| <a href="#">165</a> | 417.23   | 832.45   | 832.45   | -1.19 | 0    | 30    | 0.0082 | 1    | R.VIVCNTK.L <a href="#">161</a> <a href="#">162</a> <a href="#">163</a> <a href="#">164</a> <a href="#">166</a> <a href="#">167</a> <a href="#">168</a> <a href="#">169</a> |

377. [GBG4\\_HUMAN](#) Mass: 8554 Score: 40 Queries matched: 2 emPAI: 1.18

Guanine nucleotide-binding protein G(I)/G(S)/G(O) subunit gamma-4 OS=Homo sapiens GN=GNG4 PE=1 SV=1

| Query | Observed | Mr(expt) | Mr(calc) | ppm | Miss | Score | Expect | Rank | Peptide |
|-------|----------|----------|----------|-----|------|-------|--------|------|---------|
|-------|----------|----------|----------|-----|------|-------|--------|------|---------|

[82](#) 408.25 814.49 814.49 -1.25 1 29 0.0072 4 R.KAVEQLK.M  
[562](#) 456.67 911.33 911.33 -1.67 0 27 0.0019 1 K.MEACMDR.V

378. [PROM2\\_HUMAN](#) Mass: 93079 Score: 40 Queries matched: 1 emPAI: 0.04  
 Prominin-2 OS=Homo sapiens GN=PROM2 PE=1 SV=1  
 Query Observed Mr(expt) Mr(calc) ppm Miss Score Expect Rank Peptide  
[1302](#) 527.78 1053.55 1053.56 -2.40 0 40 0.00074 1 K.AVAQQPEGVR.T

379. [ZNT4\\_HUMAN](#) Mass: 47852 Score: 40 Queries matched: 1 emPAI: 0.08  
 Zinc transporter 4 OS=Homo sapiens GN=SLC30A4 PE=2 SV=2  
 Query Observed Mr(expt) Mr(calc) ppm Miss Score Expect Rank Peptide  
[4112](#) 869.86 1737.70 1737.70 -0.82 1 40 0.0001 1 R.QEVDRTCANCQSSSP.-

380. [AT8B1\\_HUMAN](#) Mass: 144802 Score: 40 Queries matched: 1 emPAI: 0.03  
 Probable phospholipid-transporting ATPase IC OS=Homo sapiens GN=ATP8B1 PE=1 SV=3  
 Query Observed Mr(expt) Mr(calc) ppm Miss Score Expect Rank Peptide  
[1100](#) 512.26 1022.51 1022.50 2.63 0 40 0.00094 1 K.GADTVIYER.L

381. [TM63A\\_HUMAN](#) Mass: 93549 Score: 39 Queries matched: 4 emPAI: 0.04  
 Transmembrane protein 63A OS=Homo sapiens GN=TMEM63A PE=2 SV=3  
 Query Observed Mr(expt) Mr(calc) ppm Miss Score Expect Rank Peptide  
[605](#) 462.21 922.40 922.40 -1.14 0 32 0.0023 1 K.CQSLQCK.G [604](#)  
[1437](#) 541.25 1080.49 1080.49 -7.33 0 7 0.82 2 K.GEPQPSHSR.E [1436](#)

382. [SERC1\\_HUMAN](#) Mass: 51488 Score: 39 Queries matched: 2 emPAI: 0.07  
 Serine incorporator 1 OS=Homo sapiens GN=SERC1 PE=1 SV=1  
 Query Observed Mr(expt) Mr(calc) ppm Miss Score Expect Rank Peptide  
[282](#) 429.23 856.44 856.44 1.02 0 36 0.0014 1 K.IQESQPR.S [283](#)

383. [PROF1\\_HUMAN](#) Mass: 15216 Score: 39 Queries matched: 1 emPAI: 0.26  
 Profilin-1 OS=Homo sapiens GN=PFN1 PE=1 SV=2  
 Query Observed Mr(expt) Mr(calc) ppm Miss Score Expect Rank Peptide  
[2999](#) 690.36 1378.71 1378.71 2.43 0 39 0.0012 1 K.STGGAPTFNVTVK.T

384. [RAB44\\_HUMAN](#) Score: 38 Queries matched: 3  
 Ras-related protein Rab-44 OS=Homo sapiens GN=RAB44 PE=3 SV=3  
 Query Observed Mr(expt) Mr(calc) ppm Miss Score Expect Rank Peptide  
[816](#) 484.68 967.34 967.34 -0.70 0 (20) 0.009 2 K.MDCEER.Q [817](#)  
[897](#) 492.67 983.33 983.33 0.44 0 25 0.0033 2 K.MDCEER.Q

385. [ITCH\\_HUMAN](#) Mass: 103593 Score: 38 Queries matched: 1 emPAI: 0.04  
 E3 ubiquitin-protein ligase Itchy homolog OS=Homo sapiens GN=ITCH PE=1 SV=2  
 Query Observed Mr(expt) Mr(calc) ppm Miss Score Expect Rank Peptide  
[4273](#) 895.88 1789.74 1789.74 1.30 0 38 0.00015 1 R.VSTNGSDDPEDAGAGENR.R

386. [MYO1B\\_HUMAN](#) Mass: 132928 Score: 37 Queries matched: 3 emPAI: 0.03  
 Unconventional myosin-Ib OS=Homo sapiens GN=MYO1B PE=1 SV=3  
 Query Observed Mr(expt) Mr(calc) ppm Miss Score Expect Rank Peptide  
[915](#) 494.27 986.52 986.51 9.72 0 4 4.6 7 K.MPSLSPIDK.N [914](#)  
[1040](#) 505.23 1008.45 1008.45 -1.01 0 37 0.00087 1 R.DQFTDQOK.L

|                                                                                              |                             |                    |                    |                    |             |       |        |      |                 |                                                                                 |
|----------------------------------------------------------------------------------------------|-----------------------------|--------------------|--------------------|--------------------|-------------|-------|--------|------|-----------------|---------------------------------------------------------------------------------|
| 387.                                                                                         | <a href="#">K2C7_HUMAN</a>  | Score: 37          | Queries matched: 7 |                    |             |       |        |      |                 |                                                                                 |
| Keratin, type II cytoskeletal 7 OS=Homo sapiens GN=KRT7 PE=1 SV=5                            |                             |                    |                    |                    |             |       |        |      |                 |                                                                                 |
| Query                                                                                        | Observed                    | Mr(expt)           | Mr(calc)           | ppm                | Miss        | Score | Expect | Rank | Peptide         |                                                                                 |
| <a href="#">973</a>                                                                          | 500.23                      | 998.44             | 998.44             | 6.75               | 0           | (21)  | 0.03   | 2    | K.DVDAAYMSK.V   | <a href="#">968</a> <a href="#">969</a> <a href="#">970</a> <a href="#">972</a> |
| <a href="#">1070</a>                                                                         | 508.22                      | 1014.43            | 1014.43            | 1.78               | 0           | 24    | 0.0078 | 2    | K.DVDAAYMSK.V   | <a href="#">1069</a>                                                            |
| 388.                                                                                         | <a href="#">DDAH1_HUMAN</a> | Mass: 31444        | Score: 36          | Queries matched: 2 | emPAI: 0.12 |       |        |      |                 |                                                                                 |
| N(G),N(G)-dimethylarginine dimethylaminohydrolase 1 OS=Homo sapiens GN=DDAH1 PE=1 SV=3       |                             |                    |                    |                    |             |       |        |      |                 |                                                                                 |
| Query                                                                                        | Observed                    | Mr(expt)           | Mr(calc)           | ppm                | Miss        | Score | Expect | Rank | Peptide         |                                                                                 |
| <a href="#">1826</a>                                                                         | 575.76                      | 1149.51            | 1149.52            | -4.93              | 0           | 30    | 0.0039 | 1    | R.TPEEYPESAK.V  | <a href="#">1827</a>                                                            |
| 389.                                                                                         | <a href="#">FUCM_HUMAN</a>  | Score: 35          | Queries matched: 2 |                    |             |       |        |      |                 |                                                                                 |
| Fucose mutarotase OS=Homo sapiens GN=FUOM PE=1 SV=2                                          |                             |                    |                    |                    |             |       |        |      |                 |                                                                                 |
| Query                                                                                        | Observed                    | Mr(expt)           | Mr(calc)           | ppm                | Miss        | Score | Expect | Rank | Peptide         |                                                                                 |
| <a href="#">6</a>                                                                            | 400.75                      | 799.49             | 799.49             | 0.16               | 1           | 35    | 0.0023 | 2    | R.ALAKIER.F     |                                                                                 |
| <a href="#">2559</a>                                                                         | 644.82                      | 1287.63            | 1287.62            | 7.66               | 1           | 2     | 4.1    | 5    | K.IERFEFYER.A   |                                                                                 |
| 390.                                                                                         | <a href="#">YES_HUMAN</a>   | Mass: 61276        | Score: 34          | Queries matched: 3 | emPAI: 0.06 |       |        |      |                 |                                                                                 |
| Tyrosine-protein kinase Yes OS=Homo sapiens GN=YES1 PE=1 SV=3                                |                             |                    |                    |                    |             |       |        |      |                 |                                                                                 |
| Query                                                                                        | Observed                    | Mr(expt)           | Mr(calc)           | ppm                | Miss        | Score | Expect | Rank | Peptide         |                                                                                 |
| <a href="#">398</a>                                                                          | 443.72                      | 885.43             | 885.43             | -2.10              | 0           | 1     | 4.2    | 5    | K.DAWEIPR.E     |                                                                                 |
| <a href="#">732</a>                                                                          | 475.75                      | 949.49             | 949.49             | -0.30              | 0           | 4     | 3.1    | 2    | R.AQFDTLQK.L    |                                                                                 |
| <a href="#">1104</a>                                                                         | 512.80                      | 1023.58            | 1023.58            | 0.47               | 0           | 34    | 0.0013 | 1    | R.LLLNPGNQR.G   |                                                                                 |
| 391.                                                                                         | <a href="#">UBA1_HUMAN</a>  | Mass: 118858       | Score: 34          | Queries matched: 2 | emPAI: 0.03 |       |        |      |                 |                                                                                 |
| Ubiquitin-like modifier-activating enzyme 1 OS=Homo sapiens GN=UBA1 PE=1 SV=3                |                             |                    |                    |                    |             |       |        |      |                 |                                                                                 |
| Query                                                                                        | Observed                    | Mr(expt)           | Mr(calc)           | ppm                | Miss        | Score | Expect | Rank | Peptide         |                                                                                 |
| <a href="#">2361</a>                                                                         | 625.79                      | 1249.56            | 1249.56            | 0.20               | 0           | 34    | 0.0018 | 1    | R.AENYDIPSADR.H |                                                                                 |
| <a href="#">2560</a>                                                                         | 644.84                      | 1287.66            | 1287.66            | 0.29               | 0           | 1     |        | 7    | 9               | R.QLYVLGHEAMK.R                                                                 |
| 392.                                                                                         | <a href="#">RHOA_HUMAN</a>  | Score: 34          | Queries matched: 3 |                    |             |       |        |      |                 |                                                                                 |
| Transforming protein RhoA OS=Homo sapiens GN=RHOA PE=1 SV=1                                  |                             |                    |                    |                    |             |       |        |      |                 |                                                                                 |
| Query                                                                                        | Observed                    | Mr(expt)           | Mr(calc)           | ppm                | Miss        | Score | Expect | Rank | Peptide         |                                                                                 |
| <a href="#">1480</a>                                                                         | 544.79                      | 1087.57            | 1087.57            | 3.55               | 0           | 34    | 0.0039 | 2    | K.LVIVGDGACGK.T | <a href="#">1478</a> <a href="#">1479</a>                                       |
| Proteins matching the same set of peptides:                                                  |                             |                    |                    |                    |             |       |        |      |                 |                                                                                 |
| <a href="#">RHOC_HUMAN</a>                                                                   | Score: 34                   | Queries matched: 3 |                    |                    |             |       |        |      |                 |                                                                                 |
| 393.                                                                                         | <a href="#">ABCB6_HUMAN</a> | Score: 34          | Queries matched: 1 |                    |             |       |        |      |                 |                                                                                 |
| ATP-binding cassette sub-family B member 6, mitochondrial OS=Homo sapiens GN=ABCB6 PE=1 SV=5 |                             |                    |                    |                    |             |       |        |      |                 |                                                                                 |
| Query                                                                                        | Observed                    | Mr(expt)           | Mr(calc)           | ppm                | Miss        | Score | Expect | Rank | Peptide         |                                                                                 |
| <a href="#">12</a>                                                                           | 401.25                      | 800.48             | 800.48             | 7.00               | 0           | 34    | 0.0047 | 2    | R.AIQASLAK.V    |                                                                                 |
| 394.                                                                                         | <a href="#">MGRN1_HUMAN</a> | Mass: 61456        | Score: 33          | Queries matched: 3 | emPAI: 0.06 |       |        |      |                 |                                                                                 |
| E3 ubiquitin-protein ligase MGRN1 OS=Homo sapiens GN=MGRN1 PE=1 SV=2                         |                             |                    |                    |                    |             |       |        |      |                 |                                                                                 |
| Query                                                                                        | Observed                    | Mr(expt)           | Mr(calc)           | ppm                | Miss        | Score | Expect | Rank | Peptide         |                                                                                 |
| <a href="#">2610</a>                                                                         | 648.28                      | 1294.55            | 1294.55            | -7.45              | 0           | 23    | 0.0079 | 1    | R.YQANNCFICR.L  | <a href="#">2609</a> <a href="#">2611</a>                                       |
| Proteins matching the same set of peptides:                                                  |                             |                    |                    |                    |             |       |        |      |                 |                                                                                 |
| <a href="#">RN157_HUMAN</a>                                                                  | Mass: 74731                 | Score: 33          | Queries matched: 3 |                    |             |       |        |      |                 |                                                                                 |

RING finger protein 157 OS=Homo sapiens GN=RNF157 PE=1 SV=3

|                                                                                    |                             |              |                    |                    |             |       |        |      |                                                                                              |
|------------------------------------------------------------------------------------|-----------------------------|--------------|--------------------|--------------------|-------------|-------|--------|------|----------------------------------------------------------------------------------------------|
| 395.                                                                               | <a href="#">NCKP1_HUMAN</a> | Mass: 130018 | Score: 33          | Queries matched: 2 | emPAI: 0.03 |       |        |      |                                                                                              |
| Nck-associated protein 1 OS=Homo sapiens GN=NCKAP1 PE=1 SV=1                       |                             |              |                    |                    |             |       |        |      |                                                                                              |
| Query                                                                              | Observed                    | Mr(expt)     | Mr(calc)           | ppm                | Miss        | Score | Expect | Rank | Peptide                                                                                      |
| <a href="#">946</a>                                                                | 497.76                      | 993.50       | 993.51             | -9.10              | 1           | 4     | 3.5    | 8    | R.KYGPVMQR.Y                                                                                 |
| <a href="#">2631</a>                                                               | 649.84                      | 1297.67      | 1297.67            | -2.28              | 0           | 33    | 0.0028 | 1    | R.NNNQQLAQLQK.E                                                                              |
| 396.                                                                               | <a href="#">UBR2_HUMAN</a>  | Score: 33    | Queries matched: 2 |                    |             |       |        |      |                                                                                              |
| E3 ubiquitin-protein ligase UBR2 OS=Homo sapiens GN=UBR2 PE=1 SV=1                 |                             |              |                    |                    |             |       |        |      |                                                                                              |
| Query                                                                              | Observed                    | Mr(expt)     | Mr(calc)           | ppm                | Miss        | Score | Expect | Rank | Peptide                                                                                      |
| <a href="#">440</a>                                                                | 446.75                      | 891.49       | 891.49             | -1.71              | 0           | 31    | 0.0072 | 2    | R.AGIMPFLLK.C <a href="#">439</a>                                                            |
| 397.                                                                               | <a href="#">APIB1_HUMAN</a> | Mass: 105482 | Score: 33          | Queries matched: 2 | emPAI: 0.04 |       |        |      |                                                                                              |
| AP-1 complex subunit beta-1 OS=Homo sapiens GN=APIB1 PE=1 SV=2                     |                             |              |                    |                    |             |       |        |      |                                                                                              |
| Query                                                                              | Observed                    | Mr(expt)     | Mr(calc)           | ppm                | Miss        | Score | Expect | Rank | Peptide                                                                                      |
| <a href="#">939</a>                                                                | 496.73                      | 991.44       | 991.44             | -0.76              | 0           | 33    | 0.002  | 1    | R.EAQSICER.V <a href="#">938</a>                                                             |
| Proteins matching the same set of peptides:                                        |                             |              |                    |                    |             |       |        |      |                                                                                              |
| <a href="#">AP2B1_HUMAN</a>                                                        | Mass: 105398                | Score: 33    | Queries matched: 2 |                    |             |       |        |      |                                                                                              |
| AP-2 complex subunit beta OS=Homo sapiens GN=AP2B1 PE=1 SV=1                       |                             |              |                    |                    |             |       |        |      |                                                                                              |
| 398.                                                                               | <a href="#">RALB_HUMAN</a>  | Mass: 23508  | Score: 33          | Queries matched: 5 | emPAI: 0.16 |       |        |      |                                                                                              |
| Ras-related protein Ral-B OS=Homo sapiens GN=RALB PE=1 SV=1                        |                             |              |                    |                    |             |       |        |      |                                                                                              |
| Query                                                                              | Observed                    | Mr(expt)     | Mr(calc)           | ppm                | Miss        | Score | Expect | Rank | Peptide                                                                                      |
| <a href="#">626</a>                                                                | 464.25                      | 926.49       | 926.48             | 4.24               | 0           | 29    | 0.0073 | 1    | R.QVPVEEAR.S <a href="#">620</a> <a href="#">621</a> <a href="#">624</a> <a href="#">625</a> |
| 399.                                                                               | <a href="#">VINC_HUMAN</a>  | Mass: 124292 | Score: 32          | Queries matched: 2 | emPAI: 0.03 |       |        |      |                                                                                              |
| Vinculin OS=Homo sapiens GN=VCL PE=1 SV=4                                          |                             |              |                    |                    |             |       |        |      |                                                                                              |
| Query                                                                              | Observed                    | Mr(expt)     | Mr(calc)           | ppm                | Miss        | Score | Expect | Rank | Peptide                                                                                      |
| <a href="#">2475</a>                                                               | 635.34                      | 1268.67      | 1268.67            | -2.98              | 0           | 32    | 0.0034 | 1    | K.AVAGNISDPGLQK.S <a href="#">2476</a>                                                       |
| 400.                                                                               | <a href="#">TNAP3_HUMAN</a> | Score: 32    | Queries matched: 6 |                    |             |       |        |      |                                                                                              |
| Tumor necrosis factor alpha-induced protein 3 OS=Homo sapiens GN=TNFAIP3 PE=1 SV=1 |                             |              |                    |                    |             |       |        |      |                                                                                              |
| Query                                                                              | Observed                    | Mr(expt)     | Mr(calc)           | ppm                | Miss        | Score | Expect | Rank | Peptide                                                                                      |
| <a href="#">471</a>                                                                | 450.25                      | 898.48       | 898.48             | 1.04               | 0           | 27    | 0.0092 | 2    | K.LDEANLPK.E <a href="#">467</a> <a href="#">468</a> <a href="#">469</a> <a href="#">470</a> |
| <a href="#">639</a>                                                                | 465.26                      | 928.50       | 928.51             | -10.00             | 1           | 5     |        | 4    | 7 K.SDPSRLVR.S                                                                               |
| 401.                                                                               | <a href="#">CYTC_HUMAN</a>  | Mass: 16017  | Score: 32          | Queries matched: 1 | emPAI: 0.24 |       |        |      |                                                                                              |
| Cystatin-C OS=Homo sapiens GN=CST3 PE=1 SV=1                                       |                             |              |                    |                    |             |       |        |      |                                                                                              |
| Query                                                                              | Observed                    | Mr(expt)     | Mr(calc)           | ppm                | Miss        | Score | Expect | Rank | Peptide                                                                                      |
| <a href="#">2231</a>                                                               | 613.81                      | 1225.60      | 1225.60            | 0.49               | 0           | 32    | 0.0053 | 1    | R.ALDFAVGEYNK.A                                                                              |
| 402.                                                                               | <a href="#">PTHB1_HUMAN</a> | Mass: 100415 | Score: 32          | Queries matched: 4 | emPAI: 0.04 |       |        |      |                                                                                              |
| Protein PTHB1 OS=Homo sapiens GN=BBS9 PE=1 SV=1                                    |                             |              |                    |                    |             |       |        |      |                                                                                              |
| Query                                                                              | Observed                    | Mr(expt)     | Mr(calc)           | ppm                | Miss        | Score | Expect | Rank | Peptide                                                                                      |
| <a href="#">26</a>                                                                 | 402.73                      | 803.44       | 803.44             | 0.24               | 0           | 30    | 0.016  | 1    | K.ITIDTNK.S <a href="#">27</a>                                                               |
| <a href="#">1251</a>                                                               | 523.77                      | 1045.52      | 1045.52            | 5.51               | 1           | 2     | 7.3    | 3    | K.RQETEQQK.L                                                                                 |
| <a href="#">2191</a>                                                               | 610.30                      | 1218.59      | 1218.58            | 5.61               | 0           | 5     | 1.8    | 4    | K.LMYEHNLR.T                                                                                 |
| 403.                                                                               | <a href="#">SARG_HUMAN</a>  | Mass: 64211  | Score: 32          | Queries matched: 1 | emPAI: 0.06 |       |        |      |                                                                                              |

Specifically androgen-regulated gene protein OS=Homo sapiens GN=SARG PE=1 SV=2

| Query                | Observed | Mr(expt) | Mr(calc) | ppm  | Miss | Score | Expect | Rank | Peptide             |
|----------------------|----------|----------|----------|------|------|-------|--------|------|---------------------|
| <a href="#">3538</a> | 772.85   | 1543.68  | 1543.68  | 2.38 | 0    | 32    | 0.0025 | 1    | R.AEDAPLSSGEDPNSR.L |

404. [VAT1\\_HUMAN](#) Mass: 42122 Score: 31 Queries matched: 1 emPAI: 0.09

Synaptic vesicle membrane protein VAT-1 homolog OS=Homo sapiens GN=VAT1 PE=1 SV=2

| Query                | Observed | Mr(expt) | Mr(calc) | ppm   | Miss | Score | Expect | Rank | Peptide         |
|----------------------|----------|----------|----------|-------|------|-------|--------|------|-----------------|
| <a href="#">2071</a> | 597.84   | 1193.66  | 1193.67  | -2.31 | 1    | 31    | 0.0026 | 1    | K.VLLVPGPEKEN.- |

405. [SPTN2\\_HUMAN](#) Mass: 272526 Score: 31 Queries matched: 7 emPAI: 0.01

Spectrin beta chain, non-erythrocytic 2 OS=Homo sapiens GN=SPTN2 PE=1 SV=3

| Query                | Observed | Mr(expt) | Mr(calc) | ppm   | Miss | Score | Expect | Rank | Peptide                                                                        |
|----------------------|----------|----------|----------|-------|------|-------|--------|------|--------------------------------------------------------------------------------|
| <a href="#">158</a>  | 416.23   | 830.45   | 830.45   | -1.26 | 0    | 1     | 8.9    | 4    | K.LTALEER.E                                                                    |
| <a href="#">435</a>  | 445.71   | 889.41   | 889.41   | 0.14  | 0    | 14    | 0.3    | 3    | R.EESLGEAR.R <a href="#">436</a>                                               |
| <a href="#">1787</a> | 572.82   | 1143.62  | 1143.61  | 8.02  | 1    | 26    | 0.024  | 1    | R.GEMSGRLGPLK.L <a href="#">1784</a> <a href="#">1785</a> <a href="#">1786</a> |

406. [K1609\\_HUMAN](#) Mass: 51588 Score: 31 Queries matched: 1 emPAI: 0.07

TLD domain-containing protein KIAA1609 OS=Homo sapiens GN=KIAA1609 PE=1 SV=2

| Query                | Observed | Mr(expt) | Mr(calc) | ppm  | Miss | Score | Expect | Rank | Peptide        |
|----------------------|----------|----------|----------|------|------|-------|--------|------|----------------|
| <a href="#">1261</a> | 524.77   | 1047.53  | 1047.53  | 0.27 | 0    | 31    | 0.0074 | 1    | K.MISATEGPVK.A |

407. [EPM2A\\_HUMAN](#) Score: 31 Queries matched: 7

Laforin OS=Homo sapiens GN=EPM2A PE=1 SV=2

| Query                | Observed | Mr(expt) | Mr(calc) | ppm   | Miss | Score | Expect | Rank | Peptide                                                                                               |
|----------------------|----------|----------|----------|-------|------|-------|--------|------|-------------------------------------------------------------------------------------------------------|
| <a href="#">3141</a> | 711.83   | 1421.65  | 1421.66  | -2.99 | 0    | 23    | 0.02   | 2    | R.YPEPMTPTDTMIK.L <a href="#">3142</a> <a href="#">3143</a> <a href="#">3144</a> <a href="#">3145</a> |
| <a href="#">3190</a> | 719.84   | 1437.66  | 1437.65  | 3.04  | 0    | (6)   | 1      | 4    | R.YPEPMTPTDTMIK.L <a href="#">3192</a>                                                                |

408. [SRP54\\_HUMAN](#) Score: 31 Queries matched: 4

Signal recognition particle 54 kDa protein OS=Homo sapiens GN=SRP54 PE=1 SV=1

| Query                | Observed | Mr(expt) | Mr(calc) | ppm   | Miss | Score | Expect | Rank | Peptide                                                                         |
|----------------------|----------|----------|----------|-------|------|-------|--------|------|---------------------------------------------------------------------------------|
| <a href="#">3381</a> | 747.84   | 1493.67  | 1493.68  | -2.98 | 1    | 26    | 0.0078 | 2    | K.LNQMAKMM DPR.V <a href="#">3380</a> <a href="#">3382</a> <a href="#">3384</a> |

409. [SYCC\\_HUMAN](#) Score: 31 Queries matched: 2

Cysteine--tRNA ligase, cytoplasmic OS=Homo sapiens GN=CARS PE=1 SV=3

| Query                | Observed | Mr(expt) | Mr(calc) | ppm   | Miss | Score | Expect | Rank | Peptide        |
|----------------------|----------|----------|----------|-------|------|-------|--------|------|----------------|
| <a href="#">1033</a> | 504.72   | 1007.42  | 1007.43  | -9.48 | 0    | 31    | 0.0037 | 2    | -.MADSSGQGGK.G |
| <a href="#">1709</a> | 566.80   | 1131.58  | 1131.59  | -9.68 | 0    | 7     | 2      | 3    | R.LAFLMHSWK.D  |

410. [RNF14\\_HUMAN](#) Score: 30 Queries matched: 1

E3 ubiquitin-protein ligase RNF14 OS=Homo sapiens GN=RNF14 PE=1 SV=1

| Query                | Observed | Mr(expt) | Mr(calc) | ppm  | Miss | Score | Expect | Rank | Peptide           |
|----------------------|----------|----------|----------|------|------|-------|--------|------|-------------------|
| <a href="#">3538</a> | 772.85   | 1543.68  | 1543.68  | 1.79 | 0    | 30    | 0.0033 | 2    | R.DGQVQCLNCPPEK.C |

411. [MPP10\\_HUMAN](#) Mass: 78930 Score: 30 Queries matched: 2 emPAI: 0.05

U3 small nucleolar ribonucleoprotein protein MPP10 OS=Homo sapiens GN=MPHOSPH10 PE=1 SV=2

| Query                | Observed | Mr(expt) | Mr(calc) | ppm   | Miss | Score | Expect | Rank | Peptide        |
|----------------------|----------|----------|----------|-------|------|-------|--------|------|----------------|
| <a href="#">898</a>  | 492.74   | 983.47   | 983.48   | -7.23 | 0    | 2     | 3.9    | 2    | K.MMDSLFLK.L   |
| <a href="#">1002</a> | 502.27   | 1002.53  | 1002.53  | -5.32 | 1    | 30    | 0.012  | 1    | K.AGDIKTAAEK.T |

412. [UBP30\\_HUMAN](#) Score: 30 Queries matched: 4



Ubiquitin carboxyl-terminal hydrolase 30 OS=Homo sapiens GN=USP30 PE=1 SV=1

| Query                | Observed | Mr(expt) | Mr(calc) | ppm   | Miss | Score | Expect | Rank | Peptide                                                  |
|----------------------|----------|----------|----------|-------|------|-------|--------|------|----------------------------------------------------------|
| <a href="#">1018</a> | 503.73   | 1005.45  | 1005.45  | -1.50 | 0    | (14)  | 0.2    | 3    | R.AEAAMTAADR.A <a href="#">1019</a> <a href="#">1020</a> |
| <a href="#">1097</a> | 511.73   | 1021.45  | 1021.45  | 1.17  | 0    | 30    | 0.0051 | 2    | R.AEAAMTAADR.A                                           |

413. [SMAG2\\_HUMAN](#) Mass: 75892 Score: 30 Queries matched: 1 emPAI: 0.05

Protein Smaug homolog 2 OS=Homo sapiens GN=SAMD4B PE=1 SV=1

| Query               | Observed | Mr(expt) | Mr(calc) | ppm  | Miss | Score | Expect | Rank | Peptide     |
|---------------------|----------|----------|----------|------|------|-------|--------|------|-------------|
| <a href="#">159</a> | 416.25   | 830.48   | 830.47   | 8.55 | 1    | 30    | 0.011  | 1    | R.VTRTQAR.F |

414. [AIMP1\\_HUMAN](#) Score: 30 Queries matched: 5

Aminoacyl tRNA synthase complex-interacting multifunctional protein 1 OS=Homo sapiens GN=AIMP1 PE=1 SV=2

| Query                | Observed | Mr(expt) | Mr(calc) | ppm   | Miss | Score | Expect | Rank | Peptide                                                   |
|----------------------|----------|----------|----------|-------|------|-------|--------|------|-----------------------------------------------------------|
| <a href="#">82</a>   | 408.25   | 814.49   | 814.49   | -1.27 | 0    | 30    | 0.0069 | 2    | K.QQVSLK.E                                                |
| <a href="#">934</a>  | 496.25   | 990.48   | 990.48   | 2.19  | 0    | 2     | 6.6    | 4    | -.MANNDAVLK.R                                             |
| <a href="#">1903</a> | 581.29   | 1160.57  | 1160.57  | 2.03  | 1    | 6     | 1.8    | 3    | K.EQIKGGTGDEK.K <a href="#">1898</a> <a href="#">1901</a> |

415. [NRAP\\_HUMAN](#) Score: 30 Queries matched: 1

Nebulin-related-anchoring protein OS=Homo sapiens GN=NRAP PE=2 SV=2

| Query              | Observed | Mr(expt) | Mr(calc) | ppm   | Miss | Score | Expect | Rank | Peptide     |
|--------------------|----------|----------|----------|-------|------|-------|--------|------|-------------|
| <a href="#">82</a> | 408.25   | 814.49   | 814.49   | -1.25 | 1    | 30    | 0.0069 | 2    | R.KKPDSIK.F |

416. [SPRE\\_HUMAN](#) Score: 29 Queries matched: 2

Sepiapterin reductase OS=Homo sapiens GN=SPR PE=1 SV=1

| Query                | Observed | Mr(expt) | Mr(calc) | ppm   | Miss | Score | Expect | Rank | Peptide        |
|----------------------|----------|----------|----------|-------|------|-------|--------|------|----------------|
| <a href="#">82</a>   | 408.25   | 814.49   | 814.49   | -1.25 | 1    | 29    | 0.0072 | 4    | R.KGLQELK.A    |
| <a href="#">1258</a> | 524.28   | 1046.55  | 1046.55  | -7.66 | 0    | 17    | 0.18   | 2    | R.AVCLLTGASR.G |

417. [ABHEB\\_HUMAN](#) Mass: 22446 Score: 29 Queries matched: 2 emPAI: 0.17

Alpha/beta hydrolase domain-containing protein 14B OS=Homo sapiens GN=ABHD14B PE=1 SV=1

| Query               | Observed | Mr(expt) | Mr(calc) | ppm   | Miss | Score | Expect | Rank | Peptide                            |
|---------------------|----------|----------|----------|-------|------|-------|--------|------|------------------------------------|
| <a href="#">905</a> | 493.25   | 984.50   | 984.50   | -3.56 | 0    | 29    | 0.0073 | 1    | R.EALPGSGQAR.F <a href="#">903</a> |

418. [ZBT32\\_HUMAN](#) Mass: 53671 Score: 29 Queries matched: 4 emPAI: 0.07

Zinc finger and BTB domain-containing protein 32 OS=Homo sapiens GN=ZBTB32 PE=1 SV=1

| Query               | Observed | Mr(expt) | Mr(calc) | ppm  | Miss | Score | Expect | Rank | Peptide                                                                  |
|---------------------|----------|----------|----------|------|------|-------|--------|------|--------------------------------------------------------------------------|
| <a href="#">325</a> | 434.75   | 867.49   | 867.49   | 1.20 | 0    | 23    | 0.02   | 1    | R.LQAPVGQR.G <a href="#">323</a> <a href="#">324</a> <a href="#">327</a> |

419. [CD151\\_HUMAN](#) Mass: 29132 Score: 29 Queries matched: 5 emPAI: 0.13

CD151 antigen OS=Homo sapiens GN=CD151 PE=1 SV=3

| Query                | Observed | Mr(expt) | Mr(calc) | ppm   | Miss | Score | Expect | Rank | Peptide                                              |
|----------------------|----------|----------|----------|-------|------|-------|--------|------|------------------------------------------------------|
| <a href="#">307</a>  | 432.22   | 862.43   | 862.42   | 4.30  | 0    | 29    | 0.015  | 1    | K.VEGGCITK.L                                         |
| <a href="#">778</a>  | 482.71   | 963.41   | 963.42   | -0.60 | 0    | 16    | 0.063  | 1    | R.VVPDSCKK.T <a href="#">779</a> <a href="#">780</a> |
| <a href="#">1002</a> | 502.27   | 1002.53  | 1002.53  | 1.15  | 0    | 13    | 0.54   | 3    | K.TVVALCGQR.D                                        |

420. [TSN11\\_HUMAN](#) Score: 29 Queries matched: 1

Tetraspanin-11 OS=Homo sapiens GN=TSN11 PE=2 SV=2

| Query               | Observed | Mr(expt) | Mr(calc) | ppm  | Miss | Score | Expect | Rank | Peptide      |
|---------------------|----------|----------|----------|------|------|-------|--------|------|--------------|
| <a href="#">307</a> | 432.22   | 862.43   | 862.42   | 4.30 | 0    | 29    | 0.015  | 1    | K.VEGGCLTK.L |

|                                                                                                |                             |                    |                    |                    |             |           |               |          |                                                                                                                                                                              |
|------------------------------------------------------------------------------------------------|-----------------------------|--------------------|--------------------|--------------------|-------------|-----------|---------------|----------|------------------------------------------------------------------------------------------------------------------------------------------------------------------------------|
| 421.                                                                                           | <a href="#">FILA_HUMAN</a>  | Mass: 435036       | Score: 29          | Queries matched: 6 | emPAI: 0.01 |           |               |          |                                                                                                                                                                              |
| Filaggrin OS=Homo sapiens GN=FLG PE=1 SV=3                                                     |                             |                    |                    |                    |             |           |               |          |                                                                                                                                                                              |
| Query                                                                                          | Observed                    | Mr(expt)           | Mr(calc)           | ppm                | Miss        | Score     | Expect        | Rank     | Peptide                                                                                                                                                                      |
| <a href="#">110</a>                                                                            | 411.73                      | 821.45             | 821.46             | -8.98              | 1           | 4         | 2             | 6        | R.HSGIPRR.Q                                                                                                                                                                  |
| <a href="#">1002</a>                                                                           | 502.27                      | 1002.53            | 1002.53            | -5.31              | 1           | 8         | 1.6           | 5        | R.LSERLEEK.E                                                                                                                                                                 |
| <a href="#">1089</a>                                                                           | 510.76                      | 1019.50            | 1019.51            | -6.73              | 1           | 5         | 3.3           | 9        | K.SSSQVNRSR.H                                                                                                                                                                |
| <a href="#">2806</a>                                                                           | <b>670.30</b>               | <b>1338.59</b>     | <b>1338.60</b>     | <b>-8.72</b>       | <b>1</b>    | <b>25</b> | <b>0.013</b>  | <b>1</b> | <b>R.HHEASSRADSSR.H</b> <a href="#">2805</a> <a href="#">2807</a>                                                                                                            |
| <hr/>                                                                                          |                             |                    |                    |                    |             |           |               |          |                                                                                                                                                                              |
| 422.                                                                                           | <a href="#">CRLD2_HUMAN</a> | Mass: 57366        | Score: 29          | Queries matched: 3 | emPAI: 0.06 |           |               |          |                                                                                                                                                                              |
| Cysteine-rich secretory protein LCCL domain-containing 2 OS=Homo sapiens GN=CRISPLD2 PE=1 SV=1 |                             |                    |                    |                    |             |           |               |          |                                                                                                                                                                              |
| Query                                                                                          | Observed                    | Mr(expt)           | Mr(calc)           | ppm                | Miss        | Score     | Expect        | Rank     | Peptide                                                                                                                                                                      |
| <a href="#">1274</a>                                                                           | <b>525.74</b>               | <b>1049.48</b>     | <b>1049.47</b>     | <b>0.76</b>        | <b>0</b>    | <b>29</b> | <b>0.0066</b> | <b>1</b> | <b>K.IGCAVNTCR.K</b> <a href="#">1272</a>                                                                                                                                    |
| <a href="#">2328</a>                                                                           | 622.82                      | 1243.62            | 1243.62            | 1.59               | 0           | 3         | 3.9           | 7        | R.NGVQESLGTTPR.D                                                                                                                                                             |
| <hr/>                                                                                          |                             |                    |                    |                    |             |           |               |          |                                                                                                                                                                              |
| 423.                                                                                           | <a href="#">TR49C_HUMAN</a> | Score: 29          | Queries matched: 9 |                    |             |           |               |          |                                                                                                                                                                              |
| Tripartite motif-containing protein 49C OS=Homo sapiens GN=TRIM49C PE=2 SV=1                   |                             |                    |                    |                    |             |           |               |          |                                                                                                                                                                              |
| Query                                                                                          | Observed                    | Mr(expt)           | Mr(calc)           | ppm                | Miss        | Score     | Expect        | Rank     | Peptide                                                                                                                                                                      |
| <a href="#">651</a>                                                                            | 466.76                      | 931.50             | 931.50             | -1.93              | 0           | 29        | 0.015         | 2        | K.STEQINLK.T <a href="#">650</a> <a href="#">652</a> <a href="#">653</a> <a href="#">654</a> <a href="#">655</a> <a href="#">656</a> <a href="#">657</a> <a href="#">658</a> |
| Proteins matching the same set of peptides:                                                    |                             |                    |                    |                    |             |           |               |          |                                                                                                                                                                              |
| <a href="#">TRI49_HUMAN</a>                                                                    | Score: 29                   | Queries matched: 9 |                    |                    |             |           |               |          |                                                                                                                                                                              |
| <hr/>                                                                                          |                             |                    |                    |                    |             |           |               |          |                                                                                                                                                                              |
| 424.                                                                                           | <a href="#">FA73B_HUMAN</a> | Score: 29          | Queries matched: 2 |                    |             |           |               |          |                                                                                                                                                                              |
| Protein FAM73B OS=Homo sapiens GN=FAM73B PE=1 SV=1                                             |                             |                    |                    |                    |             |           |               |          |                                                                                                                                                                              |
| Query                                                                                          | Observed                    | Mr(expt)           | Mr(calc)           | ppm                | Miss        | Score     | Expect        | Rank     | Peptide                                                                                                                                                                      |
| <a href="#">1005</a>                                                                           | 502.73                      | 1003.44            | 1003.44            | -1.64              | 0           | 24        | 0.011         | 2        | R.GDSGSTPMPR.D <a href="#">1006</a>                                                                                                                                          |
| <hr/>                                                                                          |                             |                    |                    |                    |             |           |               |          |                                                                                                                                                                              |
| 425.                                                                                           | <a href="#">TMED2_HUMAN</a> | Mass: 22860        | Score: 29          | Queries matched: 1 | emPAI: 0.17 |           |               |          |                                                                                                                                                                              |
| Transmembrane emp24 domain-containing protein 2 OS=Homo sapiens GN=TMED2 PE=1 SV=1             |                             |                    |                    |                    |             |           |               |          |                                                                                                                                                                              |
| Query                                                                                          | Observed                    | Mr(expt)           | Mr(calc)           | ppm                | Miss        | Score     | Expect        | Rank     | Peptide                                                                                                                                                                      |
| <a href="#">1007</a>                                                                           | <b>502.74</b>               | <b>1003.47</b>     | <b>1003.47</b>     | <b>3.20</b>        | <b>0</b>    | <b>29</b> | <b>0.0061</b> | <b>1</b> | <b>R.AINDNTNSR.V</b>                                                                                                                                                         |
| <hr/>                                                                                          |                             |                    |                    |                    |             |           |               |          |                                                                                                                                                                              |
| 426.                                                                                           | <a href="#">BASI_HUMAN</a>  | Mass: 42573        | Score: 29          | Queries matched: 1 | emPAI: 0.09 |           |               |          |                                                                                                                                                                              |
| Basigin OS=Homo sapiens GN=BSG PE=1 SV=2                                                       |                             |                    |                    |                    |             |           |               |          |                                                                                                                                                                              |
| Query                                                                                          | Observed                    | Mr(expt)           | Mr(calc)           | ppm                | Miss        | Score     | Expect        | Rank     | Peptide                                                                                                                                                                      |
| <a href="#">1065</a>                                                                           | <b>507.75</b>               | <b>1013.49</b>     | <b>1013.49</b>     | <b>1.53</b>        | <b>0</b>    | <b>29</b> | <b>0.0084</b> | <b>1</b> | <b>R.FFVSSSQGR.S</b>                                                                                                                                                         |
| <hr/>                                                                                          |                             |                    |                    |                    |             |           |               |          |                                                                                                                                                                              |
| 427.                                                                                           | <a href="#">UNC80_HUMAN</a> | Mass: 367152       | Score: 28          | Queries matched: 5 | emPAI: 0.01 |           |               |          |                                                                                                                                                                              |
| Protein unc-80 homolog OS=Homo sapiens GN=UNC80 PE=2 SV=2                                      |                             |                    |                    |                    |             |           |               |          |                                                                                                                                                                              |
| Query                                                                                          | Observed                    | Mr(expt)           | Mr(calc)           | ppm                | Miss        | Score     | Expect        | Rank     | Peptide                                                                                                                                                                      |
| <a href="#">633</a>                                                                            | 465.24                      | 928.46             | 928.45             | 8.09               | 0           | 3         | 3             | 3        | K.EAHGNVFR.R                                                                                                                                                                 |
| <a href="#">847</a>                                                                            | 488.25                      | 974.49             | 974.48             | 8.54               | 0           | 9         | 1.3           | 5        | R.SSPINSQSR.T                                                                                                                                                                |
| <a href="#">1466</a>                                                                           | 544.29                      | 1086.57            | 1086.56            | 9.75               | 0           | 2         | 6.8           | 7        | R.WNLIHYNK.T                                                                                                                                                                 |
| <a href="#">1694</a>                                                                           | <b>566.29</b>               | <b>1130.57</b>     | <b>1130.58</b>     | <b>-6.81</b>       | <b>1</b>    | <b>28</b> | <b>0.011</b>  | <b>1</b> | <b>K.RSSPINSQSR.T</b>                                                                                                                                                        |
| <a href="#">2254</a>                                                                           | 615.78                      | 1229.55            | 1229.54            | 3.43               | 0           | 7         | 0.66          | 2        | R.QDELMYMLR.K                                                                                                                                                                |
| <hr/>                                                                                          |                             |                    |                    |                    |             |           |               |          |                                                                                                                                                                              |
| 428.                                                                                           | <a href="#">FAT2_HUMAN</a>  | Mass: 482097       | Score: 28          | Queries matched: 4 | emPAI: 0.01 |           |               |          |                                                                                                                                                                              |
| Protocadherin Fat 2 OS=Homo sapiens GN=FAT2 PE=1 SV=2                                          |                             |                    |                    |                    |             |           |               |          |                                                                                                                                                                              |
| Query                                                                                          | Observed                    | Mr(expt)           | Mr(calc)           | ppm                | Miss        | Score     | Expect        | Rank     | Peptide                                                                                                                                                                      |
| <a href="#">109</a>                                                                            | 411.69                      | 821.37             | 821.38             | -6.22              | 0           | 7         | 1.1           | 8        | K.GNNGSAFR.V                                                                                                                                                                 |
| <a href="#">116</a>                                                                            | 412.70                      | 823.38             | 823.38             | -0.61              | 0           | 1         | 4.7           | 7        | R.DGQVSYR.L                                                                                                                                                                  |
| <a href="#">850</a>                                                                            | <b>488.27</b>               | <b>974.52</b>      | <b>974.51</b>      | <b>8.10</b>        | <b>0</b>    | <b>28</b> | <b>0.017</b>  | <b>1</b> | <b>K.SSNTALLNR.E</b>                                                                                                                                                         |
| <a href="#">1634</a>                                                                           | 560.27                      | 1118.52            | 1118.53            | -6.76              | 1           | 1         | 5.4           | 5        | K.LDRENSTER.V                                                                                                                                                                |

|                                                                                   |                             |              |                     |                     |                                                                                                                         |
|-----------------------------------------------------------------------------------|-----------------------------|--------------|---------------------|---------------------|-------------------------------------------------------------------------------------------------------------------------|
| 429.                                                                              | <a href="#">PPIA_HUMAN</a>  | Mass: 18229  | Score: 28           | Queries matched: 3  | emPAI: 0.47                                                                                                             |
| Peptidyl-prolyl cis-trans isomerase A OS=Homo sapiens GN=PPIA PE=1 SV=2           |                             |              |                     |                     |                                                                                                                         |
| Query                                                                             | Observed                    | Mr(expt)     | Mr(calc)            | ppm                 | Miss Score Expect Rank Peptide                                                                                          |
| <a href="#">247</a>                                                               | 424.71                      | 847.41       | 847.41              | 8.06                | 0 23 0.048 1 K.TEWLDGK.H                                                                                                |
| <a href="#">1634</a>                                                              | 560.27                      | 1118.52      | 1118.53             | -3.35               | 0 22 0.037 1 K.ITIADCGQLE.-                                                                                             |
| <a href="#">3772</a>                                                              | 807.88                      | 1613.74      | 1613.73             | 2.23                | 0 14 0.17 1 R.IIPGFMCQGGDFTR.H                                                                                          |
| 430.                                                                              | <a href="#">WNT3A_HUMAN</a> | Score: 28    | Queries matched: 2  |                     |                                                                                                                         |
| Protein Wnt-3a OS=Homo sapiens GN=WNT3A PE=1 SV=2                                 |                             |              |                     |                     |                                                                                                                         |
| Query                                                                             | Observed                    | Mr(expt)     | Mr(calc)            | ppm                 | Miss Score Expect Rank Peptide                                                                                          |
| <a href="#">1839</a>                                                              | 576.31                      | 1150.60      | 1150.59             | 9.62                | 0 28 0.015 2 R.QAIASHMHLK.C <a href="#">1836</a>                                                                        |
| 431.                                                                              | <a href="#">CS018_HUMAN</a> | Score: 28    | Queries matched: 4  |                     |                                                                                                                         |
| Uncharacterized protein C19orf18 OS=Homo sapiens GN=C19orf18 PE=2 SV=1            |                             |              |                     |                     |                                                                                                                         |
| Query                                                                             | Observed                    | Mr(expt)     | Mr(calc)            | ppm                 | Miss Score Expect Rank Peptide                                                                                          |
| <a href="#">86</a>                                                                | 408.71                      | 815.41       | 815.41              | 0.04                | 0 25 0.025 2 R.LAQAEER.Q <a href="#">83</a> <a href="#">84</a> <a href="#">85</a>                                       |
| 432.                                                                              | <a href="#">ANXA3_HUMAN</a> | Mass: 36524  | Score: 28           | Queries matched: 1  | emPAI: 0.10                                                                                                             |
| Annexin A3 OS=Homo sapiens GN=ANXA3 PE=1 SV=3                                     |                             |              |                     |                     |                                                                                                                         |
| Query                                                                             | Observed                    | Mr(expt)     | Mr(calc)            | ppm                 | Miss Score Expect Rank Peptide                                                                                          |
| <a href="#">859</a>                                                               | 489.77                      | 977.52       | 977.52              | -0.51               | 0 28 0.015 1 K.QDAQILYK.A                                                                                               |
| 433.                                                                              | <a href="#">FA43A_HUMAN</a> | Mass: 46203  | Score: 27           | Queries matched: 1  | emPAI: 0.08                                                                                                             |
| Protein FAM43A OS=Homo sapiens GN=FAM43A PE=2 SV=2                                |                             |              |                     |                     |                                                                                                                         |
| Query                                                                             | Observed                    | Mr(expt)     | Mr(calc)            | ppm                 | Miss Score Expect Rank Peptide                                                                                          |
| <a href="#">3640</a>                                                              | 786.84                      | 1571.66      | 1571.67             | -6.61               | 0 27 0.0023 1 R.AAEGDPAEEEEAEQR.A                                                                                       |
| 434.                                                                              | <a href="#">AT2B3_HUMAN</a> | Mass: 135253 | Score: 27           | Queries matched: 15 | emPAI: 0.06                                                                                                             |
| Plasma membrane calcium-transporting ATPase 3 OS=Homo sapiens GN=ATP2B3 PE=1 SV=2 |                             |              |                     |                     |                                                                                                                         |
| Query                                                                             | Observed                    | Mr(expt)     | Mr(calc)            | ppm                 | Miss Score Expect Rank Peptide                                                                                          |
| <a href="#">42</a>                                                                | 405.21                      | 808.41       | 808.41              | -5.73               | 0 24 0.026 2 K.SMSTVIR.M <a href="#">38</a> <a href="#">39</a> <a href="#">40</a> <a href="#">41</a> <a href="#">43</a> |
| <a href="#">2048</a>                                                              | 596.30                      | 1190.58      | 1190.57             | 5.96                | 0 (0) 7.8 6 R.MVTGDNINTAR.A                                                                                             |
| <a href="#">2122</a>                                                              | 604.29                      | 1206.57      | 1206.57             | 2.71                | 0 22 0.043 2 R.MVTGDNINTAR.A <a href="#">2118</a> <a href="#">2119</a> <a href="#">2120</a> <a href="#">2121</a>        |
| <a href="#">3471</a>                                                              | 762.85                      | 1523.69      | 1523.69             | 1.61                | 1 6 1 1 K.QQDGAMESSQTKAK.K <a href="#">3472</a>                                                                         |
| <a href="#">3837</a>                                                              | 821.43                      | 1640.85      | 1640.84             | 6.93                | 0 0 5.9 3 R.QVVAVTGDGTNDGPALK.K                                                                                         |
| 435.                                                                              | <a href="#">AT2B4_HUMAN</a> | Score: 27    | Queries matched: 14 |                     |                                                                                                                         |
| Plasma membrane calcium-transporting ATPase 4 OS=Homo sapiens GN=ATP2B4 PE=1 SV=2 |                             |              |                     |                     |                                                                                                                         |
| Query                                                                             | Observed                    | Mr(expt)     | Mr(calc)            | ppm                 | Miss Score Expect Rank Peptide                                                                                          |
| <a href="#">42</a>                                                                | 405.21                      | 808.41       | 808.41              | -5.73               | 0 24 0.026 2 K.SMSTVIR.N <a href="#">38</a> <a href="#">39</a> <a href="#">40</a> <a href="#">41</a> <a href="#">43</a> |
| <a href="#">368</a>                                                               | 440.22                      | 878.42       | 878.42              | -0.10               | 0 4 3.7 8 K.QDYQAVR.N                                                                                                   |
| <a href="#">2048</a>                                                              | 596.30                      | 1190.58      | 1190.57             | 5.96                | 0 (0) 7.8 6 R.MVTGDNINTAR.A                                                                                             |
| <a href="#">2122</a>                                                              | 604.29                      | 1206.57      | 1206.57             | 2.71                | 0 22 0.043 2 R.MVTGDNINTAR.A <a href="#">2118</a> <a href="#">2119</a> <a href="#">2120</a> <a href="#">2121</a>        |
| <a href="#">3837</a>                                                              | 821.43                      | 1640.85      | 1640.84             | 6.93                | 0 0 5.9 3 R.QVVAVTGDGTNDGPALK.K                                                                                         |
| 436.                                                                              | <a href="#">BCOR_HUMAN</a>  | Score: 27    | Queries matched: 1  |                     |                                                                                                                         |
| BCL-6 corepressor OS=Homo sapiens GN=BCOR PE=1 SV=1                               |                             |              |                     |                     |                                                                                                                         |
| Query                                                                             | Observed                    | Mr(expt)     | Mr(calc)            | ppm                 | Miss Score Expect Rank Peptide                                                                                          |
| <a href="#">981</a>                                                               | 501.27                      | 1000.53      | 1000.53             | 2.25                | 0 27 0.022 2 K.NAGETLLQR.A                                                                                              |

|                                                                                 |                             |              |                    |                    |              |       |        |      |                                                       |
|---------------------------------------------------------------------------------|-----------------------------|--------------|--------------------|--------------------|--------------|-------|--------|------|-------------------------------------------------------|
| 437.                                                                            | <a href="#">TBCB_HUMAN</a>  | Mass: 27594  | Score: 27          | Queries matched: 3 | empPAI: 0.14 |       |        |      |                                                       |
| Tubulin-folding cofactor B OS=Homo sapiens GN=TBCB PE=1 SV=2                    |                             |              |                    |                    |              |       |        |      |                                                       |
| Query                                                                           | Observed                    | Mr(expt)     | Mr(calc)           | ppm                | Miss         | Score | Expect | Rank | Peptide                                               |
| <a href="#">1402</a>                                                            | 536.79                      | 1071.56      | 1071.57            | -6.29              | 0            | 27    | 0.014  | 1    | K.AQASSIPVGSR.C <a href="#">1401</a>                  |
| <a href="#">1539</a>                                                            | 551.27                      | 1100.53      | 1100.52            | 9.39               | 0            | 3     | 3.2    | 5    | R.AQQEAEAAQR.L                                        |
| 438.                                                                            | <a href="#">SH3R3_HUMAN</a> | Score: 27    | Queries matched: 3 |                    |              |       |        |      |                                                       |
| SH3 domain-containing RING finger protein 3 OS=Homo sapiens GN=SH3RF3 PE=1 SV=2 |                             |              |                    |                    |              |       |        |      |                                                       |
| Query                                                                           | Observed                    | Mr(expt)     | Mr(calc)           | ppm                | Miss         | Score | Expect | Rank | Peptide                                               |
| <a href="#">388</a>                                                             | 442.71                      | 883.41       | 883.41             | 0.23               | 0            | 24    | 0.022  | 2    | K.DCLTFTK.D <a href="#">387</a> <a href="#">389</a>   |
| 439.                                                                            | <a href="#">PRAX_HUMAN</a>  | Score: 27    | Queries matched: 5 |                    |              |       |        |      |                                                       |
| Periactin OS=Homo sapiens GN=PRX PE=1 SV=2                                      |                             |              |                    |                    |              |       |        |      |                                                       |
| Query                                                                           | Observed                    | Mr(expt)     | Mr(calc)           | ppm                | Miss         | Score | Expect | Rank | Peptide                                               |
| <a href="#">73</a>                                                              | 406.79                      | 811.56       | 811.55             | 8.02               | 1            | 22    | 0.0071 | 2    | K.LKLPTIK.M <a href="#">72</a>                        |
| <a href="#">1958</a>                                                            | 585.33                      | 1168.65      | 1168.65            | -3.55              | 1            | 3     | 1.9    | 2    | K.VPDMKLPK.L <a href="#">1959</a>                     |
| <a href="#">2107</a>                                                            | 602.31                      | 1202.61      | 1202.60            | 6.66               | 1            | 4     | 3.6    | 4    | K.VPEMKVPEMK.L                                        |
| 440.                                                                            | <a href="#">INT1_HUMAN</a>  | Score: 26    | Queries matched: 1 |                    |              |       |        |      |                                                       |
| Integrator complex subunit 1 OS=Homo sapiens GN=INTS1 PE=1 SV=2                 |                             |              |                    |                    |              |       |        |      |                                                       |
| Query                                                                           | Observed                    | Mr(expt)     | Mr(calc)           | ppm                | Miss         | Score | Expect | Rank | Peptide                                               |
| <a href="#">480</a>                                                             | 451.25                      | 900.49       | 900.49             | 2.31               | 0            | 26    | 0.019  | 2    | R.LAEAAVAEK.R                                         |
| 441.                                                                            | <a href="#">FA83H_HUMAN</a> | Score: 25    | Queries matched: 4 |                    |              |       |        |      |                                                       |
| Protein FAM83H OS=Homo sapiens GN=FAM83H PE=1 SV=3                              |                             |              |                    |                    |              |       |        |      |                                                       |
| Query                                                                           | Observed                    | Mr(expt)     | Mr(calc)           | ppm                | Miss         | Score | Expect | Rank | Peptide                                               |
| <a href="#">460</a>                                                             | 448.22                      | 894.42       | 894.43             | -6.97              | 1            | 3     | 3      | 4    | K.QDSFRSR.L                                           |
| <a href="#">592</a>                                                             | 460.73                      | 919.44       | 919.44             | 0.09               | 0            | 25    | 0.022  | 2    | R.SDSLGTQGR.L <a href="#">591</a> <a href="#">593</a> |
| 442.                                                                            | <a href="#">MTMR6_HUMAN</a> | Score: 25    | Queries matched: 1 |                    |              |       |        |      |                                                       |
| Myotubularin-related protein 6 OS=Homo sapiens GN=MTMR6 PE=1 SV=3               |                             |              |                    |                    |              |       |        |      |                                                       |
| Query                                                                           | Observed                    | Mr(expt)     | Mr(calc)           | ppm                | Miss         | Score | Expect | Rank | Peptide                                               |
| <a href="#">352</a>                                                             | 437.25                      | 872.49       | 872.50             | -4.66              | 0            | 25    | 0.032  | 1    | K.LLEVNGTK.G                                          |
| 443.                                                                            | <a href="#">SRCAP_HUMAN</a> | Mass: 344996 | Score: 25          | Queries matched: 1 | empPAI: 0.01 |       |        |      |                                                       |
| Helicase SRCAP OS=Homo sapiens GN=SRCAP PE=1 SV=3                               |                             |              |                    |                    |              |       |        |      |                                                       |
| Query                                                                           | Observed                    | Mr(expt)     | Mr(calc)           | ppm                | Miss         | Score | Expect | Rank | Peptide                                               |
| <a href="#">760</a>                                                             | 479.79                      | 957.56       | 957.56             | 2.08               | 0            | 25    | 0.016  | 1    | K.LTLTGAQVR.Q                                         |
| 444.                                                                            | <a href="#">WDR35_HUMAN</a> | Mass: 135229 | Score: 25          | Queries matched: 6 | empPAI: 0.03 |       |        |      |                                                       |
| WD repeat-containing protein 35 OS=Homo sapiens GN=WDR35 PE=1 SV=3              |                             |              |                    |                    |              |       |        |      |                                                       |
| Query                                                                           | Observed                    | Mr(expt)     | Mr(calc)           | ppm                | Miss         | Score | Expect | Rank | Peptide                                               |
| <a href="#">496</a>                                                             | 452.24                      | 902.47       | 902.47             | -0.89              | 1            | 25    | 0.031  | 1    | K.IADEEAKK.G <a href="#">497</a>                      |
| <a href="#">2843</a>                                                            | 673.85                      | 1345.68      | 1345.69            | -2.66              | 0            | 3     | 5.4    | 4    | K.EISALSWEGGGLK.I <a href="#">2846</a>                |
| <a href="#">4043</a>                                                            | 856.39                      | 1710.76      | 1710.77            | -7.51              | 1            | 5     | 1.1    | 3    | K.WAKDNPDLFAMMEK.T <a href="#">4042</a>               |
| 445.                                                                            | <a href="#">DPOD1_HUMAN</a> | Score: 25    | Queries matched: 3 |                    |              |       |        |      |                                                       |
| DNA polymerase delta catalytic subunit OS=Homo sapiens GN=POLD1 PE=1 SV=2       |                             |              |                    |                    |              |       |        |      |                                                       |
| Query                                                                           | Observed                    | Mr(expt)     | Mr(calc)           | ppm                | Miss         | Score | Expect | Rank | Peptide                                               |

[462](#) 448.72 895.43 895.43 -4.08 0 24 0.027 2 R.ESELYQK.E [461](#) [463](#)

446. [PM2PB\\_HUMAN](#) Mass: 29106 Score: 25 Queries matched: 1 emPAI: 0.13  
Putative postmeiotic segregation increased 2-like protein 11 OS=Homo sapiens GN=PMS2P11 PE=5 SV=1

| Query                | Observed | Mr(expt) | Mr(calc) | ppm   | Miss | Score | Expect | Rank | Peptide           |
|----------------------|----------|----------|----------|-------|------|-------|--------|------|-------------------|
| <a href="#">3074</a> | 700.83   | 1399.64  | 1399.65  | -7.50 | 0    | 25    | 0.015  | 1    | K.LSAAGSYSDVTDK.A |

447. [CC170\\_HUMAN](#) Score: 24 Queries matched: 4  
Coiled-coil domain-containing protein 170 OS=Homo sapiens GN=CCDC170 PE=2 SV=3

| Query                | Observed | Mr(expt) | Mr(calc) | ppm   | Miss | Score | Expect | Rank | Peptide                          |
|----------------------|----------|----------|----------|-------|------|-------|--------|------|----------------------------------|
| <a href="#">496</a>  | 452.24   | 902.47   | 902.47   | -0.91 | 0    | 24    | 0.037  | 2    | K.LADTNELK.I <a href="#">497</a> |
| <a href="#">1240</a> | 523.29   | 1044.56  | 1044.56  | -0.55 | 1    | 1     | 6.2    | 6    | K.AIEDLNKSR.D                    |
| <a href="#">2481</a> | 635.85   | 1269.68  | 1269.69  | -2.93 | 1    | 5     | 1.9    | 2    | K.ELHMSLLRQK.I                   |

448. [CR3L2\\_HUMAN](#) Score: 24 Queries matched: 2  
Cyclic AMP-responsive element-binding protein 3-like protein 2 OS=Homo sapiens GN=CREB3L2 PE=1 SV=3

| Query               | Observed | Mr(expt) | Mr(calc) | ppm   | Miss | Score | Expect | Rank | Peptide                          |
|---------------------|----------|----------|----------|-------|------|-------|--------|------|----------------------------------|
| <a href="#">496</a> | 452.24   | 902.47   | 902.47   | -0.91 | 0    | 24    | 0.037  | 2    | K.LEGNETLK.V <a href="#">497</a> |

449. [NUDC2\\_HUMAN](#) Score: 24 Queries matched: 3  
NudC domain-containing protein 2 OS=Homo sapiens GN=NUDC2 PE=1 SV=1

| Query               | Observed | Mr(expt) | Mr(calc) | ppm  | Miss | Score | Expect | Rank | Peptide                                              |
|---------------------|----------|----------|----------|------|------|-------|--------|------|------------------------------------------------------|
| <a href="#">884</a> | 491.72   | 981.43   | 981.42   | 4.69 | 0    | 24    | 0.011  | 2    | -.MSAPFEER.S <a href="#">883</a> <a href="#">885</a> |

450. [RPC3\\_HUMAN](#) Score: 24 Queries matched: 4  
DNA-directed RNA polymerase III subunit RPC3 OS=Homo sapiens GN=POLR3C PE=1 SV=1

| Query               | Observed | Mr(expt) | Mr(calc) | ppm  | Miss | Score | Expect | Rank | Peptide                                             |
|---------------------|----------|----------|----------|------|------|-------|--------|------|-----------------------------------------------------|
| <a href="#">105</a> | 410.72   | 819.42   | 819.42   | 0.94 | 0    | (24)  | 0.049  | 2    | -.MTQAEIK.L                                         |
| <a href="#">177</a> | 418.71   | 835.41   | 835.41   | 0.65 | 0    | 24    | 0.045  | 2    | -.MTQAEIK.L <a href="#">175</a> <a href="#">176</a> |

451. [UBP24\\_HUMAN](#) Score: 24 Queries matched: 2  
Ubiquitin carboxyl-terminal hydrolase 24 OS=Homo sapiens GN=USP24 PE=1 SV=3

| Query               | Observed | Mr(expt) | Mr(calc) | ppm  | Miss | Score | Expect | Rank | Peptide                          |
|---------------------|----------|----------|----------|------|------|-------|--------|------|----------------------------------|
| <a href="#">574</a> | 457.26   | 912.51   | 912.50   | 2.58 | 1    | 24    | 0.028  | 2    | K.KDSVSLHK.K <a href="#">573</a> |

452. [5NT3B\\_HUMAN](#) Score: 24 Queries matched: 1  
7-methylguanosine phosphate-specific 5'-nucleotidase OS=Homo sapiens GN=NT5C3B PE=1 SV=4

| Query                | Observed | Mr(expt) | Mr(calc) | ppm  | Miss | Score | Expect | Rank | Peptide       |
|----------------------|----------|----------|----------|------|------|-------|--------|------|---------------|
| <a href="#">1168</a> | 517.77   | 1033.53  | 1033.52  | 3.50 | 1    | 24    | 0.035  | 2    | K.IISEECKER.E |

453. [OR4A5\\_HUMAN](#) Score: 24 Queries matched: 15  
Olfactory receptor 4A5 OS=Homo sapiens GN=OR4A5 PE=2 SV=4

| Query                | Observed | Mr(expt) | Mr(calc) | ppm  | Miss | Score | Expect | Rank | Peptide                                                                                                                                                           |
|----------------------|----------|----------|----------|------|------|-------|--------|------|-------------------------------------------------------------------------------------------------------------------------------------------------------------------|
| <a href="#">2046</a> | 596.30   | 1190.58  | 1190.57  | 5.59 | 1    | (17)  | 0.16   | 2    | R.NSEMRNAIEK.L <a href="#">2045</a> <a href="#">2047</a> <a href="#">2048</a> <a href="#">2051</a> <a href="#">2052</a> <a href="#">2053</a>                      |
| <a href="#">2120</a> | 604.29   | 1206.57  | 1206.57  | 0.83 | 1    | 24    | 0.022  | 2    | R.NSEMRNAIEK.L <a href="#">2118</a> <a href="#">2119</a> <a href="#">2121</a> <a href="#">2122</a> <a href="#">2123</a> <a href="#">2124</a> <a href="#">2125</a> |

454. [GPRL1\\_HUMAN](#) Mass: 27989 Score: 24 Queries matched: 4 emPAI: 0.14  
GLIPR1-like protein 1 OS=Homo sapiens GN=GLIPR1L1 PE=1 SV=2

| Query               | Observed | Mr(expt) | Mr(calc) | ppm   | Miss | Score | Expect | Rank | Peptide                           |
|---------------------|----------|----------|----------|-------|------|-------|--------|------|-----------------------------------|
| <a href="#">707</a> | 471.74   | 941.46   | 941.46   | -0.72 | 0    | 24    | 0.023  | 1    | K.VNPPAADMK.Y <a href="#">706</a> |

[754](#)    **479.73**    **957.45**    **957.46**    **-6.75**    **0**    **(16)**    **0.095**    **1**    **K.VNPPAADMK.Y 756**

- 
455. [BRD7\\_HUMAN](#)    **Score: 24**    **Queries matched: 1**  
 Bromodomain-containing protein 7 OS=Homo sapiens GN=BRD7 PE=1 SV=1  
**Query    Observed    Mr(expt)    Mr(calc)    ppm    Miss    Score    Expect    Rank    Peptide**  
[1040](#)    505.23    1008.45    1008.44    6.81    1    24    0.019    2    K.DKDMLEDK.F
- 
456. [VKGC\\_HUMAN](#)    **Score: 24**    **Queries matched: 4**  
 Vitamin K-dependent gamma-carboxylase OS=Homo sapiens GN=GGCX PE=1 SV=2  
**Query    Observed    Mr(expt)    Mr(calc)    ppm    Miss    Score    Expect    Rank    Peptide**  
[211](#)    421.74    841.46    841.47    -2.26    0    24    0.026    2    K.AELISGPR.Q [212](#) [213](#) [214](#)
- 
457. [H1BP3\\_HUMAN](#)    **Score: 24**    **Queries matched: 2**  
 HCLS1-binding protein 3 OS=Homo sapiens GN=HS1BP3 PE=1 SV=1  
**Query    Observed    Mr(expt)    Mr(calc)    ppm    Miss    Score    Expect    Rank    Peptide**  
[582](#)    458.75    915.48    915.48    7.14    0    24    0.055    2    R.SPGAAGLTSR.D [583](#)
- 
458. [MIEPEP\\_HUMAN](#)    **Score: 23**    **Queries matched: 1**  
 Mitochondrial intermediate peptidase OS=Homo sapiens GN=MIEPEP PE=1 SV=2  
**Query    Observed    Mr(expt)    Mr(calc)    ppm    Miss    Score    Expect    Rank    Peptide**  
[12](#)    401.25    800.48    800.48    6.98    0    23    0.056    3    R.ALQGTIAK.N
- 
459. [MDR3\\_HUMAN](#)    **Score: 23**    **Queries matched: 4**  
 Multidrug resistance protein 3 OS=Homo sapiens GN=ABCB4 PE=1 SV=2  
**Query    Observed    Mr(expt)    Mr(calc)    ppm    Miss    Score    Expect    Rank    Peptide**  
[1143](#)    516.74    1031.46    1031.46    -0.36    0    21    0.021    2    K.FESMYVEK.L [1140](#) [1141](#) [1142](#)
- 
460. [F151A\\_HUMAN](#)    **Score: 23**    **Queries matched: 10**  
 Protein FAM151A OS=Homo sapiens GN=FAM151A PE=2 SV=2  
**Query    Observed    Mr(expt)    Mr(calc)    ppm    Miss    Score    Expect    Rank    Peptide**  
[408](#)    443.76    885.50    885.50    -0.11    0    23    0.049    3    K.QLALNATR.K [400](#) [401](#) [402](#) [404](#) [405](#) [410](#) [411](#) [412](#) [413](#)
- 
461. [OSOX1\\_HUMAN](#)    **Score: 23**    **Queries matched: 1**  
 Sulfhydryl oxidase 1 OS=Homo sapiens GN=QSOX1 PE=1 SV=3  
**Query    Observed    Mr(expt)    Mr(calc)    ppm    Miss    Score    Expect    Rank    Peptide**  
[82](#)    408.25    814.49    814.49    -1.25    1    23    0.032    6    R.KEGAVLAK.K
- 
462. [CTR4\\_HUMAN](#)    **Mass: 68680**    **Score: 23**    **Queries matched: 1**    **emPAI: 0.05**  
 Cationic amino acid transporter 4 OS=Homo sapiens GN=SLC7A4 PE=2 SV=3  
**Query    Observed    Mr(expt)    Mr(calc)    ppm    Miss    Score    Expect    Rank    Peptide**  
[3606](#)    **782.41**    **1562.81**    **1562.79**    **9.61**    **0**    **23**    **0.045**    **1**    **K.SPPSPSPGPSPGLTK.Q**
- 
463. [AP4A\\_HUMAN](#)    **Score: 23**    **Queries matched: 1**  
 Bis(5'-nucleosyl)-tetraphosphatase [asymmetrical] OS=Homo sapiens GN=NUDT2 PE=1 SV=3  
**Query    Observed    Mr(expt)    Mr(calc)    ppm    Miss    Score    Expect    Rank    Peptide**  
[547](#)    455.22    908.42    908.42    -4.60    0    23    0.035    2    K.DYDVEIR.L
- 
464. [AT2B2\\_HUMAN](#)    **Score: 23**    **Queries matched: 8**  
 Plasma membrane calcium-transporting ATPase 2 OS=Homo sapiens GN=ATP2B2 PE=1 SV=2

| Query                                                                                      | Observed                    | Mr(expt)     | Mr(calc)           | ppm                | Miss        | Score | Expect | Rank | Peptide                                                                                             |
|--------------------------------------------------------------------------------------------|-----------------------------|--------------|--------------------|--------------------|-------------|-------|--------|------|-----------------------------------------------------------------------------------------------------|
| <a href="#">303</a>                                                                        | 432.22                      | 862.42       | 862.42             | 2.57               | 0           | 4     | 3.5    | 6    | K.LPDESFR.M                                                                                         |
| <a href="#">2048</a>                                                                       | 596.30                      | 1190.58      | 1190.57            | 5.96               | 0           | (0)   | 7.8    | 6    | R.MVTGDNINTAR.A                                                                                     |
| <a href="#">2122</a>                                                                       | 604.29                      | 1206.57      | 1206.57            | 2.71               | 0           | 22    | 0.043  | 2    | R.MVTGDNINTAR.A <a href="#">2118</a> <a href="#">2119</a> <a href="#">2120</a> <a href="#">2121</a> |
| <a href="#">3837</a>                                                                       | 821.43                      | 1640.85      | 1640.84            | 6.93               | 0           | 0     | 5.9    | 3    | R.QVVAVTGDGTNDGPALK.K                                                                               |
| <hr/>                                                                                      |                             |              |                    |                    |             |       |        |      |                                                                                                     |
| 465.                                                                                       | <a href="#">KANK1_HUMAN</a> | Score: 23    | Queries matched: 1 |                    |             |       |        |      |                                                                                                     |
| KN motif and ankyrin repeat domain-containing protein 1 OS=Homo sapiens GN=KANK1 PE=1 SV=3 |                             |              |                    |                    |             |       |        |      |                                                                                                     |
| Query                                                                                      | Observed                    | Mr(expt)     | Mr(calc)           | ppm                | Miss        | Score | Expect | Rank | Peptide                                                                                             |
| <a href="#">82</a>                                                                         | 408.25                      | 814.49       | 814.49             | -1.27              | 0           | 23    | 0.034  | 7    | R.QLVSQLK.N                                                                                         |
| <hr/>                                                                                      |                             |              |                    |                    |             |       |        |      |                                                                                                     |
| 466.                                                                                       | <a href="#">RHG35_HUMAN</a> | Score: 23    | Queries matched: 1 |                    |             |       |        |      |                                                                                                     |
| Rho GTPase-activating protein 35 OS=Homo sapiens GN=ARHGAP35 PE=1 SV=3                     |                             |              |                    |                    |             |       |        |      |                                                                                                     |
| Query                                                                                      | Observed                    | Mr(expt)     | Mr(calc)           | ppm                | Miss        | Score | Expect | Rank | Peptide                                                                                             |
| <a href="#">82</a>                                                                         | 408.25                      | 814.49       | 814.49             | -1.27              | 0           | 23    | 0.034  | 7    | K.QISQVLK.G                                                                                         |
| <hr/>                                                                                      |                             |              |                    |                    |             |       |        |      |                                                                                                     |
| 467.                                                                                       | <a href="#">RUFY3_HUMAN</a> | Score: 23    | Queries matched: 4 |                    |             |       |        |      |                                                                                                     |
| Protein RUFY3 OS=Homo sapiens GN=RUFY3 PE=1 SV=1                                           |                             |              |                    |                    |             |       |        |      |                                                                                                     |
| Query                                                                                      | Observed                    | Mr(expt)     | Mr(calc)           | ppm                | Miss        | Score | Expect | Rank | Peptide                                                                                             |
| <a href="#">1704</a>                                                                       | 566.78                      | 1131.54      | 1131.55            | -8.86              | 0           | 23    | 0.039  | 3    | R.TAEGQALSEAR.K <a href="#">1703</a> <a href="#">1705</a> <a href="#">1706</a>                      |
| <hr/>                                                                                      |                             |              |                    |                    |             |       |        |      |                                                                                                     |
| 468.                                                                                       | <a href="#">STK4_HUMAN</a>  | Score: 22    | Queries matched: 4 |                    |             |       |        |      |                                                                                                     |
| Serine/threonine-protein kinase 4 OS=Homo sapiens GN=STK4 PE=1 SV=2                        |                             |              |                    |                    |             |       |        |      |                                                                                                     |
| Query                                                                                      | Observed                    | Mr(expt)     | Mr(calc)           | ppm                | Miss        | Score | Expect | Rank | Peptide                                                                                             |
| <a href="#">1161</a>                                                                       | 517.75                      | 1033.49      | 1033.49            | 6.78               | 0           | 22    | 0.038  | 2    | R.AVGDEMGTVR.V <a href="#">1157</a> <a href="#">1158</a> <a href="#">1160</a>                       |
| <hr/>                                                                                      |                             |              |                    |                    |             |       |        |      |                                                                                                     |
| 469.                                                                                       | <a href="#">CCD41_HUMAN</a> | Score: 22    | Queries matched: 4 |                    |             |       |        |      |                                                                                                     |
| Coiled-coil domain-containing protein 41 OS=Homo sapiens GN=CCDC41 PE=2 SV=2               |                             |              |                    |                    |             |       |        |      |                                                                                                     |
| Query                                                                                      | Observed                    | Mr(expt)     | Mr(calc)           | ppm                | Miss        | Score | Expect | Rank | Peptide                                                                                             |
| <a href="#">498</a>                                                                        | 452.26                      | 902.51       | 902.51             | 0.50               | 1           | 7     | 2      | 8    | R.GELVEKTK.D                                                                                        |
| <a href="#">819</a>                                                                        | 486.30                      | 970.58       | 970.58             | -0.34              | 1           | 22    | 0.034  | 2    | K.VLLVEKDR.E <a href="#">820</a>                                                                    |
| <a href="#">2771</a>                                                                       | 666.35                      | 1330.68      | 1330.67            | 2.68               | 1           | 5     | 3      | 7    | R.SQAQLEAEK.T                                                                                       |
| <hr/>                                                                                      |                             |              |                    |                    |             |       |        |      |                                                                                                     |
| 470.                                                                                       | <a href="#">TXLNB_HUMAN</a> | Score: 22    | Queries matched: 4 |                    |             |       |        |      |                                                                                                     |
| Beta-taxilin OS=Homo sapiens GN=TXLNB PE=1 SV=3                                            |                             |              |                    |                    |             |       |        |      |                                                                                                     |
| Query                                                                                      | Observed                    | Mr(expt)     | Mr(calc)           | ppm                | Miss        | Score | Expect | Rank | Peptide                                                                                             |
| <a href="#">1649</a>                                                                       | 562.26                      | 1122.50      | 1122.50            | -0.58              | 0           | (18)  | 0.07   | 2    | K.LEQAQEMMK.E <a href="#">1648</a> <a href="#">1651</a>                                             |
| <a href="#">1650</a>                                                                       | 562.26                      | 1122.50      | 1122.50            | -0.04              | 0           | 22    | 0.027  | 2    | K.LEQAQEMMK.E                                                                                       |
| <hr/>                                                                                      |                             |              |                    |                    |             |       |        |      |                                                                                                     |
| 471.                                                                                       | <a href="#">DYST_HUMAN</a>  | Mass: 865259 | Score: 22          | Queries matched: 9 | emPAI: 0.00 |       |        |      |                                                                                                     |
| Dystonin OS=Homo sapiens GN=DST PE=1 SV=4                                                  |                             |              |                    |                    |             |       |        |      |                                                                                                     |
| Query                                                                                      | Observed                    | Mr(expt)     | Mr(calc)           | ppm                | Miss        | Score | Expect | Rank | Peptide                                                                                             |
| <a href="#">232</a>                                                                        | 423.24                      | 844.47       | 844.47             | 4.22               | 1           | 10    | 1.4    | 3    | K.SPASKLDK.S                                                                                        |
| <a href="#">389</a>                                                                        | 442.72                      | 883.42       | 883.41             | 7.50               | 0           | 21    | 0.048  | 3    | K.CSFLETK.L <a href="#">387</a> <a href="#">388</a>                                                 |
| <a href="#">594</a>                                                                        | 460.75                      | 919.49       | 919.48             | 9.98               | 0           | 6     | 2.5    | 6    | K.LMSLGLDIR.L                                                                                       |
| <a href="#">1948</a>                                                                       | 585.29                      | 1168.57      | 1168.57            | -0.66              | 0           | 5     | 2.3    | 3    | K.EISSHGLPSDK.A <a href="#">1946</a>                                                                |
| <a href="#">2704</a>                                                                       | 659.33                      | 1316.64      | 1316.65            | -7.08              | 1           | 11    | 0.53   | 1    | R.LENCEDRLLR.Q <a href="#">2705</a>                                                                 |
| <hr/>                                                                                      |                             |              |                    |                    |             |       |        |      |                                                                                                     |
| 472.                                                                                       | <a href="#">F117B_HUMAN</a> | Score: 22    | Queries matched: 1 |                    |             |       |        |      |                                                                                                     |
| Protein FAM117B OS=Homo sapiens GN=FAM117B PE=1 SV=2                                       |                             |              |                    |                    |             |       |        |      |                                                                                                     |
| Query                                                                                      | Observed                    | Mr(expt)     | Mr(calc)           | ppm                | Miss        | Score | Expect | Rank | Peptide                                                                                             |

|                                                                                                          |                             |              |                    |                     |             |       |        |       |                                                                                  |             |
|----------------------------------------------------------------------------------------------------------|-----------------------------|--------------|--------------------|---------------------|-------------|-------|--------|-------|----------------------------------------------------------------------------------|-------------|
|                                                                                                          | <a href="#">767</a>         | 480.29       | 958.56             | 958.56              | 1.84        | 1     | 22     | 0.038 | 2                                                                                | K.NKVNFIK.S |
| <hr/>                                                                                                    |                             |              |                    |                     |             |       |        |       |                                                                                  |             |
| 473.                                                                                                     | <a href="#">MA1B1_HUMAN</a> | Mass: 79815  | Score: 22          | Queries matched: 8  | emPAI: 0.05 |       |        |       |                                                                                  |             |
| Endoplasmic reticulum mannosyl-oligosaccharide 1,2-alpha-mannosidase OS=Homo sapiens GN=MAN1B1 PE=1 SV=2 |                             |              |                    |                     |             |       |        |       |                                                                                  |             |
| Query                                                                                                    | Observed                    | Mr(expt)     | Mr(calc)           | ppm                 | Miss        | Score | Expect | Rank  | Peptide                                                                          |             |
| <a href="#">99</a>                                                                                       | 410.20                      | 818.39       | 818.38             | 6.33                | 1           | 22    | 0.039  | 1     | M.AACEGRR.S                                                                      |             |
| <a href="#">1721</a>                                                                                     | 567.78                      | 1133.54      | 1133.53            | 5.13                | 1           | 5     | 2.4    | 5     | K.DGTQEATKR.Q <a href="#">1722</a> <a href="#">1724</a> <a href="#">1725</a>     |             |
| <a href="#">2445</a>                                                                                     | 632.81                      | 1263.61      | 1263.60            | 8.59                | 0           | 15    | 0.24   | 2     | R.ADSYIEYLLK.Q <a href="#">2443</a> <a href="#">2444</a>                         |             |
| <hr/>                                                                                                    |                             |              |                    |                     |             |       |        |       |                                                                                  |             |
| 474.                                                                                                     | <a href="#">TRY3_HUMAN</a>  | Score: 22    | Queries matched: 1 |                     |             |       |        |       |                                                                                  |             |
| Trypsin-3 OS=Homo sapiens GN=PRSS3 PE=1 SV=2                                                             |                             |              |                    |                     |             |       |        |       |                                                                                  |             |
| Query                                                                                                    | Observed                    | Mr(expt)     | Mr(calc)           | ppm                 | Miss        | Score | Expect | Rank  | Peptide                                                                          |             |
| <a href="#">45</a>                                                                                       | 405.73                      | 809.44       | 809.44             | 1.99                | 0           | 22    | 0.028  | 2     | R.LGEHNIK.V                                                                      |             |
| <hr/>                                                                                                    |                             |              |                    |                     |             |       |        |       |                                                                                  |             |
| 475.                                                                                                     | <a href="#">WDR67_HUMAN</a> | Score: 22    | Queries matched: 3 |                     |             |       |        |       |                                                                                  |             |
| WD repeat-containing protein 67 OS=Homo sapiens GN=WDR67 PE=2 SV=2                                       |                             |              |                    |                     |             |       |        |       |                                                                                  |             |
| Query                                                                                                    | Observed                    | Mr(expt)     | Mr(calc)           | ppm                 | Miss        | Score | Expect | Rank  | Peptide                                                                          |             |
| <a href="#">89</a>                                                                                       | 409.21                      | 816.40       | 816.40             | -2.54               | 0           | 6     | 1.6    | 5     | R.LDDEIGR.K                                                                      |             |
| <a href="#">431</a>                                                                                      | 445.26                      | 888.51       | 888.52             | -7.93               | 1           | 22    | 0.052  | 2     | K.MQTRILK.Q                                                                      |             |
| <a href="#">2107</a>                                                                                     | 602.31                      | 1202.61      | 1202.61            | -1.95               | 0           | 0     | 9.4    | 9     | K.LIEAGETQSQK.T                                                                  |             |
| <hr/>                                                                                                    |                             |              |                    |                     |             |       |        |       |                                                                                  |             |
| 476.                                                                                                     | <a href="#">INP4B_HUMAN</a> | Score: 22    | Queries matched: 1 |                     |             |       |        |       |                                                                                  |             |
| Type II inositol 3,4-bisphosphate 4-phosphatase OS=Homo sapiens GN=INPP4B PE=2 SV=4                      |                             |              |                    |                     |             |       |        |       |                                                                                  |             |
| Query                                                                                                    | Observed                    | Mr(expt)     | Mr(calc)           | ppm                 | Miss        | Score | Expect | Rank  | Peptide                                                                          |             |
| <a href="#">4234</a>                                                                                     | 887.89                      | 1773.77      | 1773.78            | -8.14               | 0           | 22    | 0.018  | 2     | K.SSTEESPQDQPPVMR.G                                                              |             |
| <hr/>                                                                                                    |                             |              |                    |                     |             |       |        |       |                                                                                  |             |
| 477.                                                                                                     | <a href="#">M3K9_HUMAN</a>  | Score: 21    | Queries matched: 1 |                     |             |       |        |       |                                                                                  |             |
| Mitogen-activated protein kinase kinase kinase 9 OS=Homo sapiens GN=MAP3K9 PE=1 SV=3                     |                             |              |                    |                     |             |       |        |       |                                                                                  |             |
| Query                                                                                                    | Observed                    | Mr(expt)     | Mr(calc)           | ppm                 | Miss        | Score | Expect | Rank  | Peptide                                                                          |             |
| <a href="#">96</a>                                                                                       | 409.25                      | 816.48       | 816.48             | 0.46                | 1           | 21    | 0.036  | 2     | R.KSLINSR.S                                                                      |             |
| <hr/>                                                                                                    |                             |              |                    |                     |             |       |        |       |                                                                                  |             |
| 478.                                                                                                     | <a href="#">PD2R2_HUMAN</a> | Score: 21    | Queries matched: 1 |                     |             |       |        |       |                                                                                  |             |
| Prostaglandin D2 receptor 2 OS=Homo sapiens GN=PTGDR2 PE=1 SV=3                                          |                             |              |                    |                     |             |       |        |       |                                                                                  |             |
| Query                                                                                                    | Observed                    | Mr(expt)     | Mr(calc)           | ppm                 | Miss        | Score | Expect | Rank  | Peptide                                                                          |             |
| <a href="#">82</a>                                                                                       | 408.25                      | 814.49       | 814.49             | -1.27               | 0           | 21    | 0.044  | 9     | R.QVALAVSK.F                                                                     |             |
| <hr/>                                                                                                    |                             |              |                    |                     |             |       |        |       |                                                                                  |             |
| 479.                                                                                                     | <a href="#">K1671_HUMAN</a> | Mass: 197617 | Score: 21          | Queries matched: 10 | emPAI: 0.02 |       |        |       |                                                                                  |             |
| Uncharacterized protein KIAA1671 OS=Homo sapiens GN=KIAA1671 PE=1 SV=2                                   |                             |              |                    |                     |             |       |        |       |                                                                                  |             |
| Query                                                                                                    | Observed                    | Mr(expt)     | Mr(calc)           | ppm                 | Miss        | Score | Expect | Rank  | Peptide                                                                          |             |
| <a href="#">77</a>                                                                                       | 407.71                      | 813.40       | 813.40             | -2.41               | 0           | 7     | 1.1    | 6     | K.AAESPSPR.L <a href="#">78</a>                                                  |             |
| <a href="#">206</a>                                                                                      | 421.22                      | 840.43       | 840.43             | -6.26               | 0           | 5     | 1.1    | 2     | K.QGSPVEPK.A                                                                     |             |
| <a href="#">924</a>                                                                                      | 495.76                      | 989.51       | 989.52             | -7.63               | 0           | 11    | 0.75   | 2     | R.SGPFVDQLK.Q                                                                    |             |
| <a href="#">1260</a>                                                                                     | 524.75                      | 1047.48      | 1047.48            | -5.82               | 1           | 11    | 0.34   | 2     | K.DSTEEKSPR.K <a href="#">1259</a>                                               |             |
| <a href="#">3099</a>                                                                                     | 704.86                      | 1407.70      | 1407.69            | 8.48                | 0           | 19    | 0.088  | 1     | K.QLAETLETAMGTK.S <a href="#">3096</a> <a href="#">3097</a> <a href="#">3100</a> |             |
| <hr/>                                                                                                    |                             |              |                    |                     |             |       |        |       |                                                                                  |             |
| 480.                                                                                                     | <a href="#">DPYD_HUMAN</a>  | Score: 21    | Queries matched: 1 |                     |             |       |        |       |                                                                                  |             |
| Dihydropyrimidine dehydrogenase [NADP(+)] OS=Homo sapiens GN=DPYD PE=1 SV=2                              |                             |              |                    |                     |             |       |        |       |                                                                                  |             |
| Query                                                                                                    | Observed                    | Mr(expt)     | Mr(calc)           | ppm                 | Miss        | Score | Expect | Rank  | Peptide                                                                          |             |
| <a href="#">82</a>                                                                                       | 408.25                      | 814.49       | 814.49             | -1.23               | 1           | 21    | 0.045  | 10    | K.KIIAENK.I                                                                      |             |



481. [PADI6\\_HUMAN](#) Score: 21 Queries matched: 1

Protein-arginine deiminase type-6 OS=Homo sapiens GN=PADI6 PE=1 SV=3

| Query              | Observed | Mr(expt) | Mr(calc) | ppm   | Miss | Score | Expect | Rank | Peptide     |
|--------------------|----------|----------|----------|-------|------|-------|--------|------|-------------|
| <a href="#">32</a> | 403.73   | 805.45   | 805.45   | -2.74 | 1    | 21    | 0.045  | 2    | R.AMSKTLR.D |

482. [RRP36\\_HUMAN](#) Score: 21 Queries matched: 2

Ribosomal RNA processing protein 36 homolog OS=Homo sapiens GN=RRP36 PE=1 SV=1

| Query               | Observed | Mr(expt) | Mr(calc) | ppm  | Miss | Score | Expect | Rank | Peptide                           |
|---------------------|----------|----------|----------|------|------|-------|--------|------|-----------------------------------|
| <a href="#">574</a> | 457.26   | 912.51   | 912.50   | 2.58 | 0    | 21    | 0.053  | 3    | K.QLVAGNSPK.K <a href="#">573</a> |

483. [UBP54\\_HUMAN](#) Mass: 189609 Score: 21 Queries matched: 4 emPAI: 0.02

Inactive ubiquitin carboxyl-terminal hydrolase 54 OS=Homo sapiens GN=USP54 PE=1 SV=4

| Query                | Observed      | Mr(expt)       | Mr(calc)       | ppm          | Miss     | Score    | Expect     | Rank     | Peptide                          |
|----------------------|---------------|----------------|----------------|--------------|----------|----------|------------|----------|----------------------------------|
| <a href="#">612</a>  | 463.22        | 924.43         | 924.43         | 0.17         | 1        | 21       | 0.043      | 2        | R.DSTGFKDR.S <a href="#">613</a> |
| <a href="#">1129</a> | 515.28        | 1028.54        | 1028.54        | 8.27         | 1        | 5        | 2.8        | 5        | R.AQEQLRR.K                      |
| <a href="#">4258</a> | <b>892.43</b> | <b>1782.84</b> | <b>1782.85</b> | <b>-3.19</b> | <b>1</b> | <b>2</b> | <b>3.7</b> | <b>1</b> | <b>R.SLAEQFORMQGVSMR.D</b>       |

484. [NEBL\\_HUMAN](#) Score: 21 Queries matched: 4

Nebulette OS=Homo sapiens GN=NEBL PE=1 SV=1

| Query               | Observed | Mr(expt) | Mr(calc) | ppm   | Miss | Score | Expect | Rank | Peptide                                                                 |
|---------------------|----------|----------|----------|-------|------|-------|--------|------|-------------------------------------------------------------------------|
| <a href="#">226</a> | 423.20   | 844.39   | 844.39   | -1.33 | 0    | 21    | 0.027  | 2    | K.DSFEIER.V <a href="#">225</a> <a href="#">227</a> <a href="#">228</a> |

485. [TIM21\\_HUMAN](#) Score: 21 Queries matched: 3

Mitochondrial import inner membrane translocase subunit Tim21 OS=Homo sapiens GN=TIMM21 PE=1 SV=1

| Query               | Observed | Mr(expt) | Mr(calc) | ppm  | Miss | Score | Expect | Rank | Peptide                                             |
|---------------------|----------|----------|----------|------|------|-------|--------|------|-----------------------------------------------------|
| <a href="#">462</a> | 448.72   | 895.43   | 895.42   | 3.18 | 0    | 21    | 0.057  | 3    | R.CGLQYQK.K <a href="#">461</a> <a href="#">463</a> |

486. [LINS\\_HUMAN](#) Mass: 87512 Score: 21 Queries matched: 3 emPAI: 0.04

Protein Lines homolog OS=Homo sapiens GN=LINS PE=2 SV=2

| Query               | Observed | Mr(expt) | Mr(calc) | ppm   | Miss | Score | Expect | Rank | Peptide                                             |
|---------------------|----------|----------|----------|-------|------|-------|--------|------|-----------------------------------------------------|
| <a href="#">244</a> | 424.70   | 847.39   | 847.39   | -0.82 | 0    | 21    | 0.051  | 1    | K.VGEDLCR.G <a href="#">245</a> <a href="#">246</a> |

487. [POP1\\_HUMAN](#) Score: 21 Queries matched: 1

Ribonucleases P/MRP protein subunit POP1 OS=Homo sapiens GN=POP1 PE=1 SV=2

| Query               | Observed | Mr(expt) | Mr(calc) | ppm  | Miss | Score | Expect | Rank | Peptide     |
|---------------------|----------|----------|----------|------|------|-------|--------|------|-------------|
| <a href="#">538</a> | 454.27   | 906.53   | 906.52   | 8.49 | 1    | 21    | 0.046  | 2    | K.NLLEKYK.R |

488. [PEG3\\_HUMAN](#) Score: 21 Queries matched: 5

Paternally-expressed gene 3 protein OS=Homo sapiens GN=PEG3 PE=1 SV=1

| Query               | Observed | Mr(expt) | Mr(calc) | ppm  | Miss | Score | Expect | Rank | Peptide                                              |
|---------------------|----------|----------|----------|------|------|-------|--------|------|------------------------------------------------------|
| <a href="#">785</a> | 482.73   | 963.44   | 963.44   | 6.86 | 1    | 21    | 0.043  | 2    | R.ESSDRSQR.F <a href="#">786</a>                     |
| <a href="#">882</a> | 491.72   | 981.42   | 981.42   | 5.17 | 0    | 2     | 2.2    | 3    | R.YHFDTDGK.G <a href="#">878</a> <a href="#">879</a> |

489. [DJB14\\_HUMAN](#) Score: 21 Queries matched: 3

DnaJ homolog subfamily B member 14 OS=Homo sapiens GN=DNAJB14 PE=2 SV=1

| Query                | Observed | Mr(expt) | Mr(calc) | ppm   | Miss | Score | Expect | Rank | Peptide                          |
|----------------------|----------|----------|----------|-------|------|-------|--------|------|----------------------------------|
| <a href="#">617</a>  | 464.21   | 926.42   | 926.42   | -1.54 | 0    | 21    | 0.024  | 2    | K.TDMQYAAK.V                     |
| <a href="#">1016</a> | 503.73   | 1005.44  | 1005.45  | -1.44 | 1    | 5     | 0.98   | 4    | R.NNCWKER.Q <a href="#">1017</a> |

490. [PITM2\\_HUMAN](#) Mass: 149980 Score: 21 Queries matched: 2 emPAI: 0.02

Membrane-associated phosphatidylinositol transfer protein 2 OS=Homo sapiens GN=PITPNM2 PE=1 SV=1

| Query                | Observed | Mr(expt) | Mr(calc) | ppm   | Miss | Score | Expect | Rank | Peptide                                             |
|----------------------|----------|----------|----------|-------|------|-------|--------|------|-----------------------------------------------------|
| <a href="#">330</a>  | 435.25   | 868.49   | 868.50   | -9.82 | 0    | 21    | 0.032  | 1    | R.LEPLLER.R                                         |
| <a href="#">5946</a> | 1603.71  | 4808.11  | 4808.10  | 1.46  | 1    | 4     | 0.37   | 1    | R.RGSVVSMDNDLLSPGILMNAHCCGGGGGGGGSSGGGSSGGSSLESSR.H |

491. [CMBL\\_HUMAN](#) Mass: 28372 Score: 21 Queries matched: 2 emPAI: 0.13

Carboxymethylenebutenolidase homolog OS=Homo sapiens GN=CMBL PE=1 SV=1

| Query               | Observed | Mr(expt) | Mr(calc) | ppm   | Miss | Score | Expect | Rank | Peptide      |
|---------------------|----------|----------|----------|-------|------|-------|--------|------|--------------|
| <a href="#">309</a> | 432.73   | 863.45   | 863.45   | -3.81 | 0    | 5     | 4      | 7    | R.LEYGGLGR.E |
| <a href="#">875</a> | 491.27   | 980.53   | 980.53   | 4.80  | 0    | 21    | 0.046  | 1    | R.EVQVEHIK.A |

492. [KDM2A\\_HUMAN](#) Mass: 135159 Score: 21 Queries matched: 3 emPAI: 0.03

Lysine-specific demethylase 2A OS=Homo sapiens GN=KDM2A PE=1 SV=3

| Query                | Observed | Mr(expt) | Mr(calc) | ppm  | Miss | Score | Expect | Rank | Peptide                                |
|----------------------|----------|----------|----------|------|------|-------|--------|------|----------------------------------------|
| <a href="#">110</a>  | 411.73   | 821.45   | 821.45   | 4.71 | 1    | 21    | 0.041  | 2    | R.YSQRLR.G                             |
| <a href="#">3879</a> | 826.85   | 1651.68  | 1651.67  | 4.68 | 0    | 3     | 0.56   | 1    | R.GSWAQDGEDSWQR.E <a href="#">3880</a> |

493. [ZCHC4\\_HUMAN](#) Score: 20 Queries matched: 4

Zinc finger CCHC domain-containing protein 4 OS=Homo sapiens GN=ZCCHC4 PE=1 SV=3

| Query                | Observed | Mr(expt) | Mr(calc) | ppm  | Miss | Score | Expect | Rank | Peptide                                             |
|----------------------|----------|----------|----------|------|------|-------|--------|------|-----------------------------------------------------|
| <a href="#">389</a>  | 442.72   | 883.42   | 883.41   | 3.70 | 1    | 20    | 0.059  | 4    | K.MKMETTK.G <a href="#">387</a> <a href="#">388</a> |
| <a href="#">3857</a> | 823.36   | 1644.70  | 1644.69  | 6.30 | 1    | 0     | 0.92   | 2    | R.KDCNFFQWEDEK.L                                    |

494. [EXD2\\_HUMAN](#) Mass: 71221 Score: 20 Queries matched: 2 emPAI: 0.05

Exonuclease 3'-5' domain-containing protein 2 OS=Homo sapiens GN=EXD2 PE=1 SV=2

| Query               | Observed | Mr(expt) | Mr(calc) | ppm   | Miss | Score | Expect | Rank | Peptide                         |
|---------------------|----------|----------|----------|-------|------|-------|--------|------|---------------------------------|
| <a href="#">338</a> | 436.23   | 870.44   | 870.44   | -3.57 | 0    | 20    | 0.052  | 1    | R.LLEDPER.R <a href="#">337</a> |

495. [TILB\\_HUMAN](#) Score: 20 Queries matched: 2

Protein TILB homolog OS=Homo sapiens GN=LRRC6 PE=1 SV=3

| Query               | Observed | Mr(expt) | Mr(calc) | ppm   | Miss | Score | Expect | Rank | Peptide                          |
|---------------------|----------|----------|----------|-------|------|-------|--------|------|----------------------------------|
| <a href="#">612</a> | 463.22   | 924.43   | 924.43   | -3.46 | 1    | 20    | 0.05   | 3    | K.SMKTTSDR.S <a href="#">613</a> |

496. [I22R1\\_HUMAN](#) Score: 20 Queries matched: 2

Interleukin-22 receptor subunit alpha-1 OS=Homo sapiens GN=IL22RA1 PE=1 SV=1

| Query               | Observed | Mr(expt) | Mr(calc) | ppm   | Miss | Score | Expect | Rank | Peptide                          |
|---------------------|----------|----------|----------|-------|------|-------|--------|------|----------------------------------|
| <a href="#">612</a> | 463.22   | 924.43   | 924.43   | -3.46 | 1    | 20    | 0.05   | 3    | R.SATKMTDR.F <a href="#">613</a> |

497. [ANKH1\\_HUMAN](#) Score: 20 Queries matched: 5

Ankyrin repeat and KH domain-containing protein 1 OS=Homo sapiens GN=ANKHD1 PE=1 SV=1

| Query                | Observed | Mr(expt) | Mr(calc) | ppm  | Miss | Score | Expect | Rank | Peptide                                              |
|----------------------|----------|----------|----------|------|------|-------|--------|------|------------------------------------------------------|
| <a href="#">151</a>  | 415.23   | 828.45   | 828.45   | 0.38 | 0    | 3     | 3.1    | 3    | K.LNELGQR.I                                          |
| <a href="#">839</a>  | 487.73   | 973.45   | 973.45   | 7.76 | 0    | 20    | 0.052  | 2    | K.DQAAEANK.N <a href="#">837</a> <a href="#">838</a> |
| <a href="#">2002</a> | 590.33   | 1178.65  | 1178.65  | 5.20 | 1    | 3     | 2.6    | 9    | R.KITPLMSAFR.K                                       |

498. [LRC45\\_HUMAN](#) Score: 20 Queries matched: 5

Leucine-rich repeat-containing protein 45 OS=Homo sapiens GN=LRRC45 PE=2 SV=1

| Query                | Observed | Mr(expt) | Mr(calc) | ppm   | Miss | Score | Expect | Rank | Peptide                                                              |
|----------------------|----------|----------|----------|-------|------|-------|--------|------|----------------------------------------------------------------------|
| <a href="#">83</a>   | 408.71   | 815.41   | 815.41   | -1.23 | 0    | 20    | 0.061  | 2    | R.AIQAEER.L <a href="#">84</a> <a href="#">85</a> <a href="#">86</a> |
| <a href="#">2039</a> | 595.34   | 1188.67  | 1188.66  | 7.28  | 1    | 4     | 1.5    | 2    | R.FLDLKGNNLR.A                                                       |

499. [ACOC\\_HUMAN](#) Mass: 98850 Score: 20 Queries matched: 2 emPAI: 0.04

Cytoplasmic aconitate hydratase OS=Homo sapiens GN=AC01 PE=1 SV=3

| Query                | Observed | Mr(expt) | Mr(calc) | ppm   | Miss | Score | Expect | Rank | Peptide                             |
|----------------------|----------|----------|----------|-------|------|-------|--------|------|-------------------------------------|
| <a href="#">1555</a> | 552.76   | 1103.50  | 1103.51  | -5.55 | 0    | 20    | 0.051  | 1    | K.TVVPCCSGPK.R <a href="#">1556</a> |

500. [PARI\\_HUMAN](#) Score: 19 Queries matched: 3

PCNA-interacting partner OS=Homo sapiens GN=PARPBP PE=1 SV=3

| Query                | Observed | Mr(expt) | Mr(calc) | ppm   | Miss | Score | Expect | Rank | Peptide                         |
|----------------------|----------|----------|----------|-------|------|-------|--------|------|---------------------------------|
| <a href="#">684</a>  | 469.72   | 937.42   | 937.43   | -7.03 | 1    | 19    | 0.045  | 3    | K.YNRDNEK.V <a href="#">683</a> |
| <a href="#">1951</a> | 585.30   | 1168.58  | 1168.59  | -7.35 | 0    | 0     | 7.3    | 4    | K.GYAPPPSDPLR.T                 |

Mascot: <http://www.matrixscience.com/>
